# Supplementary material for: Surfaceome CRISPR screen identifies OLFML3 as a rhinovirus-inducible IFN antagonist
Source: Genome Biol. 2021 Oct 22;22:297. doi: 10.1186/s13059-021-02513-w (PMC8532573; doi:10.1186/s13059-021-02513-w)
Supplement: Supplementary file 5 — Additional file 5. MAGeCK analysis of essential and nonessential genes of genome-wide screen. [file 13059_2021_2513_MOESM5_ESM.xlsx]

## Sheet: whone genome mock vs input
id	num	neg|score	neg|p-value	neg|fdr	neg|rank	neg|goodsgrna	neg|lfc	pos|score	pos|p-value	pos|fdr	pos|rank	pos|goodsgrna	pos|lfc
HSPA5	4	5.1051e-10	2.6397e-07	0.000215	1	4	-3.3313	1	1	1	18754	0	-3.3313
FBL	4	5.1637e-10	2.6397e-07	0.000215	2	4	-3.4402	1	1	1	18753	0	-3.4402
SF3B3	4	4.2166e-09	2.6397e-07	0.000215	3	4	-4.8204	1	1	1	18752	0	-4.8204
DDX23	4	5.0521e-09	2.6397e-07	0.000215	4	4	-3.5142	1	1	1	18748	0	-3.5142
KPNB1	4	7.6883e-09	2.6397e-07	0.000215	5	4	-3.9495	1	1	1	18751	0	-3.9495
RPL11	4	8.1448e-09	2.6397e-07	0.000215	6	4	-3.2866	1	1	1	18750	0	-3.2866
RNGTT	4	9.1693e-09	2.6397e-07	0.000215	7	4	-3.6299	1	1	1	18749	0	-3.6299
ARCN1	4	1.1566e-08	2.6397e-07	0.000215	8	4	-3.733	1	1	1	18747	0	-3.733
MEPCE	4	1.3633e-08	2.6397e-07	0.000215	9	4	-2.7584	1	1	1	18746	0	-2.7584
HNRNPU	4	1.5207e-08	2.6397e-07	0.000215	10	4	-3.2996	1	1	1	18745	0	-3.2996
CACTIN	4	1.6043e-08	2.6397e-07	0.000215	11	4	-4.6017	1	1	1	18744	0	-4.6017
PSMC2	4	1.9828e-08	2.6397e-07	0.000215	12	4	-3.007	1	1	1	18743	0	-3.007
POLR2L	4	2.3618e-08	2.6397e-07	0.000215	13	4	-3.1326	1	1	1	18742	0	-3.1326
INTS3	4	3.9796e-08	2.6397e-07	0.000215	14	4	-3.0835	1	1	1	18741	0	-3.0835
XPO1	4	4.1667e-08	2.6397e-07	0.000215	15	4	-3.4293	1	1	1	18740	0	-3.4293
SLC7A6OS	4	4.2789e-08	2.6397e-07	0.000215	16	4	-3.4993	1	1	1	18739	0	-3.4993
BUB3	4	4.7155e-08	2.6397e-07	0.000215	17	4	-3.605	1	1	1	18738	0	-3.605
UPF1	4	7.617e-08	2.6397e-07	0.000215	18	4	-2.4772	1	1	1	18737	0	-2.4772
PREB	4	8.2336e-08	2.6397e-07	0.000215	19	4	-2.7075	1	1	1	18736	0	-2.7075
CDC16	4	8.7145e-08	2.6397e-07	0.000215	20	4	-3.9134	0.99998	0.99998	1	18597	0	-3.9134
GPN2	4	1.0331e-07	2.6397e-07	0.000215	21	4	-3.6618	1	1	1	18704	0	-3.6618
RPS19	4	1.0884e-07	2.6397e-07	0.000215	22	4	-3.0211	1	1	1	18735	0	-3.0211
ANAPC5	4	1.1081e-07	2.6397e-07	0.000215	23	4	-3.8686	1	1	1	18734	0	-3.8686
SAP18	4	1.4488e-07	7.9191e-07	0.000571	24	4	-2.584	1	1	1	18733	0	-2.584
TNPO3	4	1.8725e-07	7.9191e-07	0.000571	25	4	-1.9396	1	1	1	18732	0	-1.9396
PRPF6	4	1.8971e-07	7.9191e-07	0.000571	26	4	-3.188	1	1	1	18731	0	-3.188
RPS11	4	2.0446e-07	1.0559e-06	0.000733	27	4	-2.8089	1	1	1	18730	0	-2.8089
ATP6V1B2	4	2.377e-07	1.3199e-06	0.00075	28	4	-3.1237	1	1	1	18729	0	-3.1237
DDX39B	4	2.5887e-07	1.3199e-06	0.00075	29	4	-3.604	1	1	1	18728	0	-3.604
RFC3	4	2.7288e-07	1.3199e-06	0.00075	30	4	-2.3002	1	1	1	18727	0	-2.3002
RPL36	4	2.7614e-07	1.3199e-06	0.00075	31	4	-3.0813	1	1	1	18726	0	-3.0813
WDR43	4	2.9771e-07	1.3199e-06	0.00075	32	4	-2.951	1	1	1	18725	0	-2.951
RPL8	4	3.012e-07	1.3199e-06	0.00075	33	4	-2.8986	1	1	1	18724	0	-2.8986
LSM6	4	3.3544e-07	1.8478e-06	0.000891	34	4	-2.8568	1	1	1	18723	0	-2.8568
RBM14	4	3.5322e-07	1.8478e-06	0.000891	35	4	-2.8665	1	1	1	18722	0	-2.8665
MARS	4	3.7007e-07	2.1118e-06	0.000891	36	4	-2.5723	1	1	1	18721	0	-2.5723
EIF3D	4	3.8836e-07	2.3757e-06	0.000891	37	4	-2.5849	1	1	1	18720	0	-2.5849
U2AF2	4	4.2077e-07	2.3757e-06	0.000891	38	4	-3.6487	1	1	1	18708	0	-3.6487
ELOB	4	4.2969e-07	2.3757e-06	0.000891	39	4	-2.4937	1	1	1	18719	0	-2.4937
TUBGCP2	4	4.5297e-07	2.3757e-06	0.000891	40	4	-2.4051	1	1	1	18718	0	-2.4051
LSM7	4	4.6351e-07	2.3757e-06	0.000891	41	4	-2.9541	1	1	1	18717	0	-2.9541
CCNH	4	4.6545e-07	2.3757e-06	0.000891	42	4	-2.2277	1	1	1	18716	0	-2.2277
SNRPF	4	4.6582e-07	2.3757e-06	0.000891	43	4	-3.4168	0.99992	0.99992	1	18543	0	-3.4168
QARS	4	4.942e-07	2.3757e-06	0.000891	44	4	-2.9446	1	1	1	18715	0	-2.9446
SEC22B	4	5.2746e-07	2.3757e-06	0.000891	45	4	-2.0795	1	1	1	18714	0	-2.0795
DHX35	4	5.3927e-07	2.3757e-06	0.000891	46	4	-2.6932	1	1	1	18713	0	-2.6932
SNRPD1	4	5.7249e-07	2.3757e-06	0.000891	47	4	-2.9773	1	1	1	18712	0	-2.9773
MED14	4	5.8505e-07	2.3757e-06	0.000891	48	4	-2.1317	1	1	1	18711	0	-2.1317
ATP1A1	4	5.8772e-07	2.3757e-06	0.000891	49	4	-2.8504	0.99902	0.99901	1	18296	0	-2.8504
POLR2F	4	6.0486e-07	2.3757e-06	0.000891	50	4	-3.1993	1	1	1	18710	0	-3.1993
DHX16	4	6.6731e-07	2.9037e-06	0.000908	51	4	-2.2517	1	1	1	18709	0	-2.2517
DCAF1	4	7.1156e-07	2.9037e-06	0.000908	52	4	-2.0244	1	1	1	18707	0	-2.0244
LONP1	4	7.4962e-07	2.9037e-06	0.000908	53	4	-2.2931	1	1	1	18706	0	-2.2931
EIF2B5	4	7.6077e-07	2.9037e-06	0.000908	54	4	-3.0948	1	1	1	18705	0	-3.0948
NDC80	4	7.9496e-07	2.9037e-06	0.000908	55	4	-2.5577	1	1	1	18703	0	-2.5577
VCP	4	8.288e-07	2.9037e-06	0.000908	56	4	-3.0758	1	1	1	18702	0	-3.0758
LRR1	4	8.9337e-07	2.9037e-06	0.000908	57	4	-3.1871	1	1	1	18701	0	-3.1871
TUBB	4	8.9766e-07	2.9037e-06	0.000908	58	3	-4.4426	0.97107	0.97118	1	17311	0	-4.4426
POLR3A	4	9.013e-07	2.9037e-06	0.000908	59	4	-2.3719	1	1	1	18700	0	-2.3719
PRPF19	4	9.2191e-07	2.9037e-06	0.000908	60	4	-3.2925	0.99959	0.99958	1	18396	0	-3.2925
ADSL	4	9.6164e-07	3.4316e-06	0.001055	61	4	-2.6217	1	1	1	18699	0	-2.6217
CENPW	4	1.011e-06	3.9596e-06	0.001179	62	4	-2.7092	1	1	1	18698	0	-2.7092
IPO13	4	1.1024e-06	3.9596e-06	0.001179	63	4	-2.5482	1	1	1	18697	0	-2.5482
SNRPD3	4	1.1117e-06	4.4875e-06	0.001202	64	4	-3.0956	1	1	1	18696	0	-3.0956
UXT	4	1.1173e-06	4.4875e-06	0.001202	65	4	-2.1468	1	1	1	18695	0	-2.1468
UFD1	4	1.1744e-06	4.4875e-06	0.001202	66	4	-2.5652	1	1	1	18694	0	-2.5652
SF3A2	4	1.1961e-06	4.4875e-06	0.001202	67	4	-3.1196	0.99987	0.99987	1	18495	0	-3.1196
SMC1A	4	1.2277e-06	4.4875e-06	0.001202	68	4	-3.1678	1	1	1	18693	0	-3.1678
POLE2	4	1.2745e-06	4.4875e-06	0.001202	69	4	-3.181	1	1	1	18692	0	-3.181
RPN1	4	1.2974e-06	4.4875e-06	0.001202	70	4	-2.5454	1	1	1	18691	0	-2.5454
POLR1B	4	1.3548e-06	5.0154e-06	0.001288	71	4	-2.3875	1	1	1	18690	0	-2.3875
EIF2B3	4	1.5008e-06	5.0154e-06	0.001288	72	4	-2.2137	1	1	1	18689	0	-2.2137
PHB2	4	1.5101e-06	5.0154e-06	0.001288	73	4	-2.3824	1	1	1	18688	0	-2.3824
DHX37	4	1.7065e-06	5.5434e-06	0.001405	74	4	-1.9507	1	1	1	18687	0	-1.9507
CCNA2	4	1.748e-06	6.0713e-06	0.001479	75	4	-2.5881	1	1	1	18686	0	-2.5881
CCT2	4	1.7712e-06	6.0713e-06	0.001479	76	4	-2.7723	0.99996	0.99996	1	18582	0	-2.7723
ARL2	4	1.8035e-06	6.0713e-06	0.001479	77	4	-3.0361	1	1	1	18685	0	-3.0361
EFTUD2	4	1.8991e-06	6.5993e-06	0.001547	78	4	-3.0383	1	1	1	18684	0	-3.0383
ASH2L	4	1.9158e-06	6.5993e-06	0.001547	79	4	-1.9056	1	1	1	18683	0	-1.9056
CCT3	4	1.984e-06	6.5993e-06	0.001547	80	4	-2.4317	1	1	1	18682	0	-2.4317
RABGGTB	4	2.1317e-06	7.6551e-06	0.001709	81	4	-1.6967	1	1	1	18681	0	-1.6967
CCT4	4	2.1873e-06	7.6551e-06	0.001709	82	4	-3.8757	0.99998	0.99998	1	18617	0	-3.8757
NCBP2	4	2.3294e-06	7.6551e-06	0.001709	83	4	-3.6055	1	1	1	18680	0	-3.6055
SMG1	4	2.3544e-06	7.6551e-06	0.001709	84	3	-2.4172	0.8748	0.87481	1	15376	0	-2.4172
PSMA1	4	2.4789e-06	8.1831e-06	0.001764	85	4	-2.0843	1	1	1	18679	0	-2.0843
WDR75	4	2.513e-06	8.1831e-06	0.001764	86	4	-2.5058	1	1	1	18678	0	-2.5058
ZNHIT2	4	2.6035e-06	8.1831e-06	0.001764	87	4	-3.09	1	1	1	18677	0	-3.09
NUP133	4	2.6247e-06	8.711e-06	0.001836	88	4	-3.709	1	1	1	18676	0	-3.709
PSMC5	4	2.682e-06	8.711e-06	0.001836	89	4	-2.2436	1	1	1	18675	0	-2.2436
POLR3E	4	2.8706e-06	1.0823e-05	0.00223	90	4	-2.749	1	1	1	18674	0	-2.749
PCNA	4	2.9049e-06	1.0823e-05	0.00223	91	4	-2.3495	1	1	1	18673	0	-2.3495
DDX49	4	3.0136e-06	1.1351e-05	0.002289	92	4	-1.8939	1	1	1	18672	0	-1.8939
ADAR	4	3.0373e-06	1.1351e-05	0.002289	93	4	-1.7176	1	1	1	18671	0	-1.7176
SRSF2	4	3.0667e-06	1.1879e-05	0.002321	94	4	-2.6174	0.99993	0.99993	1	18552	0	-2.6174
GUK1	4	3.0931e-06	1.1879e-05	0.002321	95	4	-1.6594	1	1	1	18670	0	-1.6594
NXT1	4	3.1782e-06	1.1879e-05	0.002321	96	4	-1.6895	1	1	1	18669	0	-1.6895
RPA3	4	3.4747e-06	1.2407e-05	0.002399	97	4	-1.9341	1	1	1	18668	0	-1.9341
PISD	4	3.6079e-06	1.2935e-05	0.002426	98	4	-2.1726	1	1	1	18667	0	-2.1726
POLR1A	4	3.6305e-06	1.2935e-05	0.002426	99	4	-2.4489	1	1	1	18666	0	-2.4489
SNRPD2	4	3.6622e-06	1.2935e-05	0.002426	100	4	-2.0328	1	1	1	18665	0	-2.0328
INTS6	4	3.7516e-06	1.3462e-05	0.002475	101	4	-4.0087	0.9915	0.99152	1	17889	0	-4.0087
EEF2	4	3.8008e-06	1.3462e-05	0.002475	102	4	-2.6427	1	1	1	18664	0	-2.6427
TRAF2	4	3.8431e-06	1.399e-05	0.002523	103	4	-1.8331	1	1	1	18663	0	-1.8331
RFC5	4	4.0062e-06	1.399e-05	0.002523	104	4	-1.639	1	0.99999	1	18662	0	-1.639
MED11	4	4.065e-06	1.4518e-05	0.002569	105	4	-2.381	1	0.99999	1	18661	0	-2.381
PSMD1	4	4.1895e-06	1.4518e-05	0.002569	106	4	-2.091	1	0.99999	1	18660	0	-2.091
IMP4	4	4.4313e-06	1.6102e-05	0.002822	107	4	-1.9537	1	0.99999	1	18659	0	-1.9537
COPS3	4	4.5749e-06	1.7422e-05	0.00292	108	4	-1.7513	1	0.99999	1	18658	0	-1.7513
TOMM22	4	4.5803e-06	1.7686e-05	0.00292	109	4	-1.6591	1	0.99999	1	18657	0	-1.6591
RUVBL1	4	4.6073e-06	1.7686e-05	0.00292	110	4	-3.4301	1	0.99999	1	18656	0	-3.4301
DHX8	4	4.6562e-06	1.8214e-05	0.00292	111	4	-2.7961	1	0.99999	1	18655	0	-2.7961
PSMB7	4	4.711e-06	1.8214e-05	0.00292	112	4	-1.9461	1	0.99999	1	18654	0	-1.9461
PRPF8	4	4.722e-06	1.8214e-05	0.00292	113	4	-2.7609	1	0.99999	1	18653	0	-2.7609
PSMA5	4	4.7275e-06	1.8214e-05	0.00292	114	4	-2.0076	1	0.99999	1	18652	0	-2.0076
PUF60	4	4.7283e-06	1.8214e-05	0.00292	115	4	-2.8303	0.99999	0.99998	1	18625	0	-2.8303
ZER1	4	4.7662e-06	1.8214e-05	0.00292	116	4	-2.8458	1	0.99999	1	18651	0	-2.8458
HYOU1	4	4.7829e-06	1.8214e-05	0.00292	117	3	-1.9664	0.98796	0.98798	1	17765	0	-1.9664
PSMC4	4	4.838e-06	1.8742e-05	0.002954	118	4	-2.6235	0.99979	0.99979	1	18465	0	-2.6235
PSMD14	4	4.8749e-06	1.8742e-05	0.002954	119	4	-2.9359	0.99995	0.99995	1	18575	0	-2.9359
SOD1	4	5.0435e-06	1.927e-05	0.002987	120	4	-2.4111	0.9966	0.99663	1	18110	0	-2.4111
MCM5	4	5.0498e-06	1.927e-05	0.002987	121	4	-1.8223	0.99999	0.99999	1	18650	0	-1.8223
PGD	4	5.4519e-06	1.9798e-05	0.003043	122	4	-3.8855	0.99999	0.99998	1	18624	0	-3.8855
SGO1	4	5.736e-06	2.0854e-05	0.003154	123	3	-2.399	0.28184	0.42336	1	7800	1	-2.399
INTS9	4	5.7372e-06	2.0854e-05	0.003154	124	4	-2.0923	0.99999	0.99999	1	18649	0	-2.0923
WDR3	4	5.8141e-06	2.1382e-05	0.003208	125	4	-1.9927	0.99999	0.99999	1	18648	0	-1.9927
TFIP11	4	5.944e-06	2.2437e-05	0.003339	126	4	-1.7611	0.99999	0.99999	1	18647	0	-1.7611
POLR2D	4	6.1228e-06	2.2965e-05	0.003339	127	4	-1.8248	0.99999	0.99999	1	18646	0	-1.8248
CNOT3	4	6.2714e-06	2.2965e-05	0.003339	128	4	-1.395	0.99999	0.99999	1	18645	0	-1.395
COPB2	4	6.3399e-06	2.2965e-05	0.003339	129	4	-2.6269	0.99999	0.99999	1	18644	0	-2.6269
EIF4A3	4	6.3997e-06	2.3493e-05	0.003389	130	4	-3.0773	0.9998	0.9998	1	18469	0	-3.0773
PRIM2	4	6.4925e-06	2.4021e-05	0.003439	131	4	-1.7011	0.99999	0.99999	1	18643	0	-1.7011
VPS28	4	6.5563e-06	2.4549e-05	0.003488	132	4	-2.6487	0.99875	0.99874	1	18262	0	-2.6487
DDX21	4	6.7769e-06	2.6133e-05	0.003685	133	4	-2.0336	0.99999	0.99999	1	18642	0	-2.0336
RRP9	4	6.8933e-06	2.6661e-05	0.003731	134	4	-2.2145	0.99999	0.99999	1	18641	0	-2.2145
POLE	4	7.1005e-06	2.7189e-05	0.003777	135	4	-2.3831	0.99999	0.99999	1	18640	0	-2.3831
COPS4	4	7.138e-06	2.7717e-05	0.003822	136	4	-2.1938	0.99999	0.99999	1	18639	0	-2.1938
POLR1C	4	7.8509e-06	3.0885e-05	0.004197	137	4	-3.3212	0.99999	0.99999	1	18629	0	-3.3212
GPN1	4	7.8789e-06	3.0885e-05	0.004197	138	4	-2.3797	0.99999	0.99999	1	18638	0	-2.3797
MCM6	4	7.9438e-06	3.1412e-05	0.004238	139	4	-1.8825	0.99999	0.99999	1	18637	0	-1.8825
PAICS	4	8.2409e-06	3.2468e-05	0.004349	140	4	-1.8416	0.99999	0.99999	1	18636	0	-1.8416
ATIC	4	8.5635e-06	3.3524e-05	0.004459	141	4	-1.604	0.99999	0.99999	1	18635	0	-1.604
CKAP5	4	8.8513e-06	3.4052e-05	0.004497	142	4	-2.8254	0.99999	0.99999	1	18634	0	-2.8254
PTPN23	4	9.0471e-06	3.458e-05	0.004535	143	4	-2.1982	0.99999	0.99999	1	18633	0	-2.1982
TXNL4A	4	9.6165e-06	3.6164e-05	0.00471	144	4	-2.5772	0.99999	0.99999	1	18632	0	-2.5772
RPL18	4	9.8268e-06	3.6692e-05	0.004713	145	3	-2.7671	0.89093	0.89092	1	15671	0	-2.7671
TOMM40	4	9.8535e-06	3.6692e-05	0.004713	146	4	-1.7499	0.99999	0.99999	1	18631	0	-1.7499
POLR2E	4	1.0005e-05	3.7748e-05	0.004816	147	4	-2.8551	0.99993	0.99993	1	18548	0	-2.8551
ANAPC2	4	1.0144e-05	3.8276e-05	0.00485	148	4	-2.4704	0.99999	0.99999	1	18630	0	-2.4704
SAMM50	4	1.0311e-05	3.8804e-05	0.004884	149	4	-1.8002	0.99999	0.99999	1	18628	0	-1.8002
MDN1	4	1.0552e-05	3.9332e-05	0.004917	150	4	-2.3923	0.99994	0.99994	1	18565	0	-2.3923
NUP62	4	1.0865e-05	4.0387e-05	0.005016	151	4	-2.5655	0.99944	0.99945	1	18364	0	-2.5655
COPA	4	1.1053e-05	4.0915e-05	0.005048	152	4	-2.3449	0.99999	0.99998	1	18627	0	-2.3449
CLP1	4	1.1442e-05	4.3027e-05	0.005274	153	4	-2.3337	0.9997	0.9997	1	18433	0	-2.3337
HAUS5	4	1.1878e-05	4.6195e-05	0.005626	154	4	-2.3691	0.99999	0.99998	1	18626	0	-2.3691
TTC27	4	1.2904e-05	5.2002e-05	0.006292	155	4	-2.354	0.99988	0.99989	1	18504	0	-2.354
PRPF31	4	1.385e-05	5.4114e-05	0.006464	156	4	-2.2464	0.99999	0.99998	1	18623	0	-2.2464
AQR	4	1.3863e-05	5.4114e-05	0.006464	157	4	-1.9103	0.99999	0.99998	1	18622	0	-1.9103
DDX41	4	1.3995e-05	5.4642e-05	0.006486	158	4	-2.2205	0.99741	0.9974	1	18158	0	-2.2205
THOC1	4	1.4956e-05	5.6754e-05	0.006611	159	4	-1.5191	0.99999	0.99998	1	18621	0	-1.5191
SRSF1	4	1.5027e-05	5.6754e-05	0.006611	160	4	-2.9001	0.99951	0.99951	1	18381	0	-2.9001
NXF1	4	1.5035e-05	5.6754e-05	0.006611	161	4	-2.7463	0.99998	0.99998	1	18620	0	-2.7463
ABCB7	4	1.53e-05	5.7809e-05	0.006692	162	4	-1.9971	0.99998	0.99998	1	18619	0	-1.9971
SARS2	4	1.5487e-05	5.8865e-05	0.006731	163	4	-1.3699	0.99998	0.99998	1	18618	0	-1.3699
SF1	4	1.5541e-05	5.8865e-05	0.006731	164	3	-2.719	0.96665	0.96672	1	17203	0	-2.719
NUF2	4	1.5581e-05	5.9393e-05	0.006751	165	3	-2.2895	0.98882	0.98883	1	17800	0	-2.2895
DONSON	4	1.5823e-05	6.0449e-05	0.006829	166	4	-2.5056	0.9999	0.99991	1	18526	0	-2.5056
INO80	4	1.648e-05	6.5201e-05	0.007322	167	4	-2.482	0.99981	0.99982	1	18473	0	-2.482
ESPL1	4	1.6632e-05	6.5729e-05	0.007337	168	4	-1.8331	0.99998	0.99998	1	18616	0	-1.8331
RBBP8	4	1.6674e-05	6.6256e-05	0.007353	169	4	-1.8168	0.99998	0.99998	1	18615	0	-1.8168
ANAPC4	4	1.6888e-05	6.6784e-05	0.007368	170	4	-2.4899	0.99998	0.99998	1	18614	0	-2.4899
SLC39A7	4	1.6974e-05	6.7312e-05	0.007382	171	4	-1.8961	0.99998	0.99998	1	18613	0	-1.8961
PI4KA	4	1.7264e-05	6.8368e-05	0.007455	172	4	-1.3116	0.99998	0.99998	1	18612	0	-1.3116
FARSB	4	1.7629e-05	7.048e-05	0.00764	173	3	-1.6953	0.8852	0.88521	1	15558	0	-1.6953
CLTC	4	1.7765e-05	7.1008e-05	0.007653	174	4	-1.7271	0.99998	0.99998	1	18611	0	-1.7271
AAMP	4	1.8921e-05	7.3648e-05	0.007893	175	3	-2.8578	0.93725	0.93733	1	16572	0	-2.8578
DHDDS	4	1.9111e-05	7.4704e-05	0.007899	176	4	-2.2903	0.99998	0.99998	1	18610	0	-2.2903
AARS	4	1.9238e-05	7.4704e-05	0.007899	177	4	-1.9721	0.99998	0.99998	1	18609	0	-1.9721
DDB1	4	1.9334e-05	7.4968e-05	0.007899	178	4	-2.7397	0.99967	0.99966	1	18416	0	-2.7397
BORA	4	1.9556e-05	7.6023e-05	0.007965	179	4	-1.3999	0.99998	0.99998	1	18608	0	-1.3999
CDK9	4	1.9613e-05	7.7343e-05	0.008045	180	4	-3.0238	0.99996	0.99995	1	18580	0	-3.0238
SNAPC3	4	1.9706e-05	7.7871e-05	0.008045	181	3	-1.8359	0.58286	0.65351	1	11565	1	-1.8359
ANAPC11	4	1.9861e-05	7.8399e-05	0.008045	182	4	-2.7679	0.99998	0.99998	1	18607	0	-2.7679
SF3B2	4	1.9941e-05	7.8927e-05	0.008045	183	4	-2.4522	0.99938	0.99939	1	18349	0	-2.4522
ABCE1	4	1.9942e-05	7.8927e-05	0.008045	184	4	-1.6245	0.99998	0.99998	1	18606	0	-1.6245
PSMB1	4	2.0755e-05	8.2623e-05	0.008376	185	3	-3.2734	0.82352	0.82354	1	14477	0	-3.2734
RCC1	4	2.164e-05	8.6846e-05	0.008757	186	4	-2.5252	0.99968	0.99966	1	18418	0	-2.5252
POLR2G	4	2.1859e-05	8.7374e-05	0.008763	187	4	-1.8713	0.99998	0.99998	1	18605	0	-1.8713
COPG1	4	2.2545e-05	9.0542e-05	0.008994	188	4	-3.4302	0.99998	0.99998	1	18604	0	-3.4302
THOC5	4	2.2831e-05	9.1598e-05	0.008994	189	4	-1.7032	0.99998	0.99998	1	18603	0	-1.7032
PSMB6	4	2.2921e-05	9.1598e-05	0.008994	190	4	-2.0549	0.99998	0.99998	1	18602	0	-2.0549
WDR25	4	2.2939e-05	9.1598e-05	0.008994	191	4	-2.7632	0.99998	0.99998	1	18601	0	-2.7632
SART1	4	2.3014e-05	9.2126e-05	0.008999	192	4	-2.4189	0.99968	0.99967	1	18419	0	-2.4189
FARSA	4	2.332e-05	9.3709e-05	0.009106	193	4	-1.8751	0.99998	0.99998	1	18600	0	-1.8751
RBBP5	4	2.3448e-05	9.4237e-05	0.00911	194	4	-1.4507	0.99998	0.99998	1	18599	0	-1.4507
NAA50	4	2.3577e-05	9.4765e-05	0.009114	195	4	-1.7616	0.99998	0.99998	1	18598	0	-1.7616
CENPK	4	2.3801e-05	9.5821e-05	0.009169	196	4	-2.7097	0.99785	0.99784	1	18190	0	-2.7097
MED30	4	2.4989e-05	9.8989e-05	0.009376	197	4	-2.7701	0.99994	0.99994	1	18557	0	-2.7701
GBF1	4	2.5069e-05	9.8989e-05	0.009376	198	3	-2.2871	0.97272	0.97288	1	17343	0	-2.2871
RPL23	4	2.5413e-05	9.9517e-05	0.009379	199	4	-1.5196	0.99997	0.99998	1	18596	0	-1.5196
HAUS3	4	2.5541e-05	0.00010004	0.009381	200	4	-3.1153	0.99993	0.99993	1	18550	0	-3.1153
EIF3G	4	2.5589e-05	0.00010057	0.009384	201	4	-1.2556	0.99997	0.99997	1	18595	0	-1.2556
SF3B6	4	2.6181e-05	0.00010268	0.009533	202	4	-1.6776	0.99997	0.99997	1	18594	0	-1.6776
HSPA9	4	2.676e-05	0.00010585	0.009731	203	3	-2.8857	0.14387	0.2804	0.942922	5486	1	-2.8857
GMPPB	4	2.6958e-05	0.00010585	0.009731	204	4	-2.5908	0.9999	0.9999	1	18524	0	-2.5908
SFPQ	4	2.7201e-05	0.00010744	0.009829	205	3	-1.0587	0.41198	0.55784	1	10027	1	-1.0587
DUT	4	2.7645e-05	0.00010902	0.009925	206	4	-2.3687	0.99997	0.99997	1	18593	0	-2.3687
EIF2B2	4	2.7728e-05	0.00010955	0.009925	207	4	-2.5678	0.99997	0.99997	1	18592	0	-2.5678
SPATA5	4	2.7915e-05	0.00011008	0.009925	208	4	-1.4734	0.99997	0.99997	1	18591	0	-1.4734
BOP1	4	3.0131e-05	0.00011694	0.010438	209	3	-2.3349	0.86103	0.86094	1	15128	0	-2.3349
NUP205	4	3.0575e-05	0.00011747	0.010438	210	4	-1.6602	0.99997	0.99997	1	18590	0	-1.6602
SART3	4	3.0819e-05	0.00011799	0.010438	211	3	-2.9425	0.92043	0.92056	1	16259	0	-2.9425
ETF1	4	3.0912e-05	0.00011799	0.010438	212	4	-2.6968	0.99997	0.99997	1	18589	0	-2.6968
CAPZB	4	3.1457e-05	0.00011905	0.010482	213	4	-2.0045	0.99997	0.99997	1	18588	0	-2.0045
RPAP1	4	3.171e-05	0.00012169	0.010664	214	3	-2.9953	0.97554	0.97574	1	17404	0	-2.9953
MFAP1	4	3.2487e-05	0.00012539	0.010887	215	3	-2.1904	0.98585	0.98584	1	17698	0	-2.1904
PMF1	4	3.2617e-05	0.00012539	0.010887	216	4	-2.666	0.9996	0.99959	1	18401	0	-2.666
MVK	4	3.288e-05	0.00012644	0.010928	217	4	-3.4669	0.99977	0.99977	1	18455	0	-3.4669
DYNLRB1	4	3.3343e-05	0.0001275	0.010968	218	4	-2.2992	0.99996	0.99996	1	18586	0	-2.2992
CPSF1	4	3.3877e-05	0.00012961	0.011099	219	3	-2.5086	0.85727	0.85722	1	15066	0	-2.5086
RPLP2	4	3.5375e-05	0.00013489	0.011499	220	4	-2.8188	0.99948	0.99949	1	18372	0	-2.8188
RBM25	4	3.586e-05	0.00013806	0.011691	221	4	-2.1514	0.99995	0.99995	1	18574	0	-2.1514
EIF3I	4	3.6003e-05	0.00013858	0.011691	222	4	-1.9652	0.99996	0.99996	1	18587	0	-1.9652
SLC20A1	4	3.614e-05	0.00013911	0.011691	223	4	-2.3368	0.99166	0.99168	1	17901	0	-2.3368
SMC3	4	3.621e-05	0.00013964	0.011691	224	4	-2.2994	0.99992	0.99991	1	18538	0	-2.2994
ALDOA	4	3.7649e-05	0.00014281	0.011842	225	4	-1.8933	0.99996	0.99996	1	18585	0	-1.8933
CDC23	4	3.7703e-05	0.00014281	0.011842	226	4	-2.5505	0.98963	0.98961	1	17827	0	-2.5505
PPP1R15B	4	3.7937e-05	0.00014334	0.011842	227	4	-1.5499	0.99996	0.99996	1	18584	0	-1.5499
INTS11	4	3.8137e-05	0.00014492	0.011868	228	4	-1.2435	0.9994	0.99942	1	18354	0	-1.2435
HAUS4	4	3.8175e-05	0.00014492	0.011868	229	4	-2.5746	0.99996	0.99996	1	18583	0	-2.5746
RPS8	4	3.8472e-05	0.00014703	0.011937	230	3	-1.5526	0.78297	0.78591	1	13826	1	-1.5526
PSMD8	4	3.8501e-05	0.00014703	0.011937	231	4	-2.9401	0.99856	0.99852	1	18241	0	-2.9401
SARS	4	4.013e-05	0.00015495	0.012526	232	3	-3.2777	0.93317	0.93326	1	16501	0	-3.2777
PSMB5	4	4.0281e-05	0.00015601	0.012557	233	3	-2.6853	0.4509	0.59117	1	10522	1	-2.6853
HARS	4	4.0983e-05	0.00015759	0.012576	234	4	-2.5924	0.99968	0.99968	1	18423	0	-2.5924
SEC13	4	4.1038e-05	0.00015759	0.012576	235	3	-2.4305	0.89681	0.89677	1	15781	0	-2.4305
SF3B5	4	4.1344e-05	0.00016023	0.012697	236	4	-2.5178	0.99493	0.99493	1	18025	0	-2.5178
PSMD6	4	4.1728e-05	0.00016129	0.012697	237	3	-2.5589	0.95437	0.9544	1	16918	0	-2.5589
DYNC1H1	4	4.2095e-05	0.00016181	0.012697	238	4	-2.8445	0.99996	0.99996	1	18581	0	-2.8445
ISG20L2	4	4.2114e-05	0.00016181	0.012697	239	4	-2.4288	0.9996	0.99959	1	18397	0	-2.4288
SMU1	4	4.2269e-05	0.00016287	0.012727	240	3	-2.2398	0.31924	0.46199	1	8446	1	-2.2398
TOP2A	4	4.3525e-05	0.00016762	0.013044	241	4	-2.0161	0.99048	0.99047	1	17853	0	-2.0161
BRF2	4	4.4242e-05	0.0001692	0.013086	242	3	-2.1893	0.55954	0.64143	1	11367	1	-2.1893
SNRNP40	4	4.4387e-05	0.00016973	0.013086	243	4	-1.4039	0.99996	0.99995	1	18579	0	-1.4039
CENPN	4	4.4644e-05	0.00017026	0.013086	244	3	-1.9194	0.9804	0.9805	1	17537	0	-1.9194
USP39	4	4.5854e-05	0.00017396	0.013316	245	4	-1.2421	0.99995	0.99995	1	18578	0	-1.2421
PSMA7	4	4.644e-05	0.00017818	0.013569	246	4	-3.5121	0.99775	0.99775	1	18184	0	-3.5121
ATP6V0C	4	4.6523e-05	0.00017871	0.013569	247	4	-2.1517	0.99994	0.99994	1	18561	0	-2.1517
RFC1	4	4.6772e-05	0.00018082	0.013674	248	4	-1.8481	0.98966	0.98964	1	17829	0	-1.8481
RAN	4	4.711e-05	0.00018293	0.013778	249	4	-2.398	0.99995	0.99995	1	18577	0	-2.398
NSL1	4	4.7513e-05	0.00018452	0.013842	250	4	-2.0933	0.99995	0.99995	1	18576	0	-2.0933
WEE1	4	4.9795e-05	0.00019402	0.014496	251	4	-2.4563	0.99995	0.99995	1	18573	0	-2.4563
SMC4	4	5.0053e-05	0.0001956	0.014557	252	4	-1.6641	0.99995	0.99994	1	18572	0	-1.6641
SNW1	4	5.0573e-05	0.00019719	0.014617	253	4	-2.0353	0.99995	0.99994	1	18571	0	-2.0353
SNRNP200	4	5.134e-05	0.00020035	0.014735	254	3	-2.185	0.81049	0.8108	1	14260	1	-2.185
BYSL	4	5.1394e-05	0.00020035	0.014735	255	4	-1.3014	0.99995	0.99994	1	18570	0	-1.3014
CCT5	4	5.1937e-05	0.00020194	0.014774	256	3	-2.4717	0.41773	0.56378	1	10104	1	-2.4717
UMPS	4	5.2026e-05	0.00020247	0.014774	257	4	-1.4432	0.99978	0.99978	1	18460	0	-1.4432
CHAF1A	4	5.2358e-05	0.00020458	0.014871	258	4	-1.7714	0.99995	0.99994	1	18569	0	-1.7714
CSE1L	4	5.2923e-05	0.00020669	0.014966	259	3	-1.8171	0.97652	0.97671	1	17433	0	-1.8171
PPP2CA	4	5.337e-05	0.0002088	0.015061	260	4	-1.488	0.99995	0.99994	1	18568	0	-1.488
USP5	4	5.4287e-05	0.0002125	0.01521	261	4	-2.3905	0.9987	0.99867	1	18258	0	-2.3905
HMGCS1	4	5.45e-05	0.0002125	0.01521	262	4	-2.0995	0.99995	0.99994	1	18567	0	-2.0995
NOL9	4	5.5117e-05	0.00021514	0.015283	263	3	-2.4035	0.83141	0.83149	1	14610	0	-2.4035
NARFL	4	5.5158e-05	0.00021514	0.015283	264	4	-2.9954	0.99994	0.99994	1	18566	0	-2.9954
ATP6V1H	4	5.6707e-05	0.000222	0.015711	265	4	-1.6847	0.99347	0.99349	1	17964	0	-1.6847
PMPCB	4	5.7134e-05	0.00022517	0.015713	266	4	-1.7882	0.99994	0.99994	1	18564	0	-1.7882
SUPT6H	4	5.7181e-05	0.00022517	0.015713	267	4	-3.7311	0.99754	0.99753	1	18165	0	-3.7311
NKAP	4	5.7241e-05	0.00022569	0.015713	268	4	-1.3282	0.99994	0.99994	1	18563	0	-1.3282
GRPEL1	4	5.7371e-05	0.00022622	0.015713	269	4	-2.653	0.99828	0.99827	1	18222	0	-2.653
EIF2S1	4	5.7385e-05	0.00022622	0.015713	270	4	-1.8189	0.99994	0.99994	1	18562	0	-1.8189
DDX51	4	5.9715e-05	0.0002352	0.016193	271	4	-1.8984	0.99994	0.99994	1	18560	0	-1.8984
NUP43	4	5.9782e-05	0.00023573	0.016193	272	3	-1.8728	0.97057	0.97065	1	17296	0	-1.8728
EXOSC8	4	5.9826e-05	0.00023573	0.016193	273	4	-2.1927	0.99994	0.99994	1	18559	0	-2.1927
DCTN2	4	6.1094e-05	0.00024312	0.016627	274	4	-1.8116	0.99994	0.99994	1	18558	0	-1.8116
CENPI	4	6.1547e-05	0.0002447	0.016627	275	4	-1.3497	0.99994	0.99994	1	18556	0	-1.3497
CDCA5	4	6.1659e-05	0.0002447	0.016627	276	4	-2.2557	0.99991	0.99991	1	18527	0	-2.2557
NGDN	4	6.2344e-05	0.00024892	0.016853	277	4	-1.3721	0.99994	0.99993	1	18555	0	-1.3721
PFDN2	4	6.265e-05	0.00025051	0.016899	278	4	-2.136	0.99994	0.99993	1	18554	0	-2.136
PSMD12	4	6.342e-05	0.00025209	0.016945	279	4	-2.1159	0.99994	0.99993	1	18553	0	-2.1159
RPL30	4	6.4978e-05	0.00026054	0.017397	280	3	-1.8458	0.089147	0.19532	0.898965	3977	1	-1.8458
RUVBL2	4	6.5426e-05	0.00026107	0.017397	281	3	-2.8864	0.93908	0.93915	1	16604	0	-2.8864
ALG11	4	6.553e-05	0.00026159	0.017397	282	4	-2.2857	0.99924	0.99924	1	18327	0	-2.2857
DHX38	4	6.7335e-05	0.00026846	0.017763	283	4	-1.3711	0.99993	0.99993	1	18551	0	-1.3711
WDR74	4	6.7418e-05	0.00026899	0.017763	284	4	-2.2267	0.99876	0.99875	1	18265	0	-2.2267
PHF5A	4	6.8162e-05	0.00027163	0.017874	285	3	-2.3162	0.96556	0.96561	1	17176	0	-2.3162
PRMT5	4	6.9753e-05	0.00027585	0.018088	286	4	-1.8251	0.99993	0.99993	1	18549	0	-1.8251
TRRAP	4	7.0645e-05	0.00027743	0.018129	287	4	-1.5418	0.99967	0.99966	1	18415	0	-1.5418
NOL10	4	7.1259e-05	0.00027902	0.018169	288	4	-1.4155	0.99993	0.99993	1	18547	0	-1.4155
SUDS3	4	7.4914e-05	0.00029644	0.019237	289	4	-1.3184	0.99993	0.99992	1	18546	0	-1.3184
DNA2	4	7.5046e-05	0.00029749	0.019239	290	4	-1.6706	0.99992	0.99992	1	18545	0	-1.6706
EIF3B	4	7.7983e-05	0.000307	0.019751	291	4	-2.4207	0.99992	0.99992	1	18544	0	-2.4207
CDK1	4	7.8254e-05	0.00030753	0.019751	292	4	-1.7387	0.99992	0.99992	1	18542	0	-1.7387
SPC25	4	7.9209e-05	0.00031069	0.019886	293	4	-1.8097	0.99992	0.99992	1	18541	0	-1.8097
CDC37	4	8.0034e-05	0.00031544	0.020122	294	4	-1.3492	0.99992	0.99992	1	18540	0	-1.3492
OGT	4	8.1424e-05	0.00032072	0.020389	295	4	-1.8822	0.99992	0.99992	1	18539	0	-1.8822
XRCC5	4	8.4642e-05	0.0003297	0.020889	296	4	-2.0398	0.99992	0.99991	1	18537	0	-2.0398
PSMC3	4	8.5932e-05	0.00033498	0.020918	297	4	-1.5724	0.99979	0.99979	1	18466	0	-1.5724
CCDC94	4	8.6578e-05	0.00033551	0.020918	298	4	-1.9658	0.99991	0.99991	1	18536	0	-1.9658
CRNKL1	4	8.6725e-05	0.00033603	0.020918	299	4	-1.8702	0.99991	0.99991	1	18535	0	-1.8702
CWC15	4	8.697e-05	0.00033762	0.020918	300	4	-1.5812	0.99991	0.99991	1	18534	0	-1.5812
PSMG3	4	8.7559e-05	0.0003392	0.020918	301	4	-1.4896	0.99991	0.99991	1	18533	0	-1.4896
DTYMK	4	8.7658e-05	0.0003392	0.020918	302	4	-1.802	0.99991	0.99991	1	18532	0	-1.802
TOP1	4	8.7954e-05	0.00033973	0.020918	303	4	-2.2337	0.99991	0.99991	1	18531	0	-2.2337
C21orf59	4	8.8053e-05	0.00034026	0.020918	304	4	-1.6492	0.99991	0.99991	1	18530	0	-1.6492
PCID2	4	8.8152e-05	0.00034026	0.020918	305	4	-2.5609	0.99991	0.99991	1	18529	0	-2.5609
PPP1R11	4	8.835e-05	0.00034131	0.020918	306	4	-1.3441	0.99991	0.99991	1	18528	0	-1.3441
VPS25	4	8.9588e-05	0.00034659	0.021173	307	4	-3.086	0.99055	0.99053	1	17855	0	-3.086
PFDN6	4	9.4665e-05	0.00036929	0.022486	308	4	-2.3006	0.99955	0.99955	1	18386	0	-2.3006
BARD1	4	9.4931e-05	0.00037141	0.022542	309	4	-1.7996	0.99974	0.99974	1	18445	0	-1.7996
NUP153	4	9.7031e-05	0.00038196	0.023013	310	4	-1.5846	0.9999	0.9999	1	18525	0	-1.5846
RPS5	4	9.7044e-05	0.00038196	0.023013	311	4	-2.6922	0.99782	0.99782	1	18188	0	-2.6922
CAD	4	9.7747e-05	0.00038355	0.023013	312	4	-2.3054	0.9982	0.99819	1	18212	0	-2.3054
POLR2H	4	9.8018e-05	0.00038408	0.023013	313	4	-2.1537	0.99575	0.99572	1	18061	0	-2.1537
THAP11	4	9.988e-05	0.00038883	0.023149	314	4	-0.82972	0.9999	0.9999	1	18523	0	-0.82972
OSBP	4	0.0001001	0.00038988	0.023149	315	4	-2.3932	0.9999	0.9999	1	18522	0	-2.3932
DIEXF	4	0.00010026	0.00039041	0.023149	316	4	-1.3033	0.9999	0.9999	1	18521	0	-1.3033
GAR1	4	0.0001007	0.00039147	0.023149	317	4	-1.4625	0.9999	0.9999	1	18520	0	-1.4625
TIMM13	4	0.00010086	0.00039252	0.023149	318	4	-1.6142	0.9999	0.9999	1	18519	0	-1.6142
STX5	4	0.00010108	0.00039464	0.02319	319	4	-1.8454	0.9999	0.9999	1	18518	0	-1.8454
SNRNP25	4	0.00010152	0.00039569	0.02319	320	4	-2.0203	0.9999	0.9999	1	18517	0	-2.0203
ERCC2	4	0.00010202	0.00039833	0.023272	321	4	-1.3702	0.9999	0.9999	1	18516	0	-1.3702
MTHFD1	4	0.00010424	0.0004015	0.023301	322	4	-1.8554	0.9999	0.9999	1	18515	0	-1.8554
SDAD1	4	0.00010436	0.00040203	0.023301	323	4	-1.9667	0.99385	0.99388	1	17983	0	-1.9667
NAPG	4	0.00010452	0.00040255	0.023301	324	4	-2.174	0.9999	0.9999	1	18514	0	-2.174
CNOT1	4	0.0001051	0.00040414	0.02331	325	4	-1.8002	0.9994	0.99942	1	18356	0	-1.8002
NUTF2	4	0.00010538	0.00040519	0.02331	326	4	-2.4369	0.99863	0.99859	1	18251	0	-2.4369
NARS	4	0.00010595	0.00040889	0.023439	327	4	-1.9546	0.99462	0.99463	1	18015	0	-1.9546
TIMM10	4	0.00010622	0.00040995	0.023439	328	4	-1.2434	0.99989	0.99989	1	18513	0	-1.2434
PPP1R2	4	0.00010708	0.00041417	0.023545	329	4	-1.6424	0.99942	0.99943	1	18359	0	-1.6424
PDCD11	4	0.00010759	0.00041575	0.023545	330	4	-1.4533	0.99989	0.99989	1	18512	0	-1.4533
TAF6	4	0.00010777	0.00041628	0.023545	331	3	-2.8758	0.97518	0.97536	1	17394	0	-2.8758
EIF3A	4	0.00010829	0.00041681	0.023545	332	4	-2.0056	0.99989	0.99989	1	18511	0	-2.0056
ECD	4	0.00010974	0.00042262	0.023789	333	4	-1.4957	0.99989	0.99989	1	18510	0	-1.4957
GNL3	4	0.00010997	0.00042367	0.023789	334	4	-1.4384	0.99989	0.99989	1	18509	0	-1.4384
EXOSC6	4	0.00011167	0.00043001	0.024073	335	4	-2.4271	0.99989	0.99989	1	18508	0	-2.4271
ARMC7	4	0.00011326	0.0004374	0.024328	336	4	-1.9098	0.99988	0.99989	1	18505	0	-1.9098
PLK1	4	0.00011328	0.0004374	0.024328	337	4	-2.4643	0.99989	0.99989	1	18507	0	-2.4643
TRAPPC8	4	0.0001137	0.00043845	0.024328	338	3	-1.4085	0.98389	0.98389	1	17640	0	-1.4085
RBBP6	4	0.00011605	0.00044637	0.024694	339	4	-1.7868	0.99988	0.99989	1	18506	0	-1.7868
INTS1	4	0.00011869	0.00046063	0.025408	340	4	-1.8225	0.99988	0.99989	1	18503	0	-1.8225
GAK	4	0.00011974	0.00046644	0.02559	341	4	-1.479	0.99988	0.99989	1	18502	0	-1.479
MED31	4	0.00011979	0.00046696	0.02559	342	3	-1.5146	0.50913	0.61716	1	10948	1	-1.5146
FDX1L	4	0.00012012	0.00046802	0.02559	343	4	-1.106	0.99988	0.99989	1	18501	0	-1.106
CDC45	4	0.00012131	0.00047066	0.025659	344	4	-2.7576	0.99988	0.99988	1	18500	0	-2.7576
MZT1	4	0.00012323	0.00047752	0.025865	345	4	-2.0551	0.99913	0.99912	1	18311	0	-2.0551
EIF2B4	4	0.00012339	0.00047805	0.025865	346	4	-2.5527	0.99755	0.99753	1	18166	0	-2.5527
NCBP1	4	0.00012355	0.00047858	0.025865	347	4	-1.5837	0.99987	0.99987	1	18494	0	-1.5837
ZMAT5	4	0.00012468	0.0004828	0.026019	348	4	-1.422	0.99988	0.99988	1	18499	0	-1.422
CDC123	4	0.00012545	0.0004865	0.026143	349	4	-1.5375	0.99987	0.99988	1	18498	0	-1.5375
PPAT	4	0.00012687	0.00049283	0.026407	350	4	-1.7324	0.99987	0.99988	1	18497	0	-1.7324
HAUS1	4	0.00012785	0.00049706	0.026558	351	4	-1.4633	0.99987	0.99988	1	18496	0	-1.4633
SMG6	4	0.00013377	0.00052345	0.027889	352	4	-1.326	0.99987	0.99987	1	18493	0	-1.326
KANSL3	4	0.00013418	0.00052768	0.028034	353	4	-1.5331	0.99987	0.99987	1	18492	0	-1.5331
THOC6	4	0.00013493	0.00053084	0.028071	354	4	-1.1101	0.99987	0.99987	1	18491	0	-1.1101
NOL7	4	0.00013554	0.00053137	0.028071	355	4	-1.2646	0.99986	0.99987	1	18490	0	-1.2646
RBM39	4	0.00013726	0.00053824	0.028354	356	4	-1.7891	0.99986	0.99987	1	18489	0	-1.7891
CENPH	4	0.00014159	0.00055618	0.029218	357	3	-2.0095	0.98816	0.98817	1	17771	0	-2.0095
GTF3C3	4	0.00014246	0.00055988	0.029275	358	4	-1.5616	0.99885	0.99883	1	18275	0	-1.5616
TTK	4	0.00014265	0.00056041	0.029275	359	4	-1.7326	0.99986	0.99986	1	18488	0	-1.7326
POLR2C	4	0.00014488	0.00056938	0.02958	360	3	-2.5032	0.9708	0.97089	1	17301	0	-2.5032
SPC24	4	0.00014493	0.00056938	0.02958	361	4	-2.4786	0.99986	0.99986	1	18487	0	-2.4786
CLUAP1	4	0.00014746	0.00057783	0.029908	362	4	-1.2485	0.99985	0.99986	1	18486	0	-1.2485
EIF5	4	0.0001479	0.00057889	0.029908	363	4	-1.2031	0.99985	0.99986	1	18485	0	-1.2031
FBXO5	4	0.000149	0.00058153	0.029961	364	4	-2.0215	0.99985	0.99986	1	18484	0	-2.0215
TBCC	4	0.00014966	0.00058522	0.030069	365	4	-1.8384	0.99985	0.99985	1	18483	0	-1.8384
POLR3B	4	0.00015132	0.00059103	0.030285	366	4	-1.9845	0.99983	0.99984	1	18476	0	-1.9845
CDC20	4	0.00015459	0.00060053	0.030629	367	4	-2.1229	0.99392	0.99395	1	17988	0	-2.1229
DDOST	4	0.00015526	0.00060264	0.030629	368	4	-1.9323	0.99984	0.99985	1	18482	0	-1.9323
CDC73	4	0.00015533	0.00060264	0.030629	369	4	-1.6562	0.99984	0.99985	1	18481	0	-1.6562
WDR7	4	0.00015647	0.00060634	0.03073	370	4	-1.0268	0.99984	0.99985	1	18480	0	-1.0268
GGPS1	4	0.00015699	0.00060792	0.03073	371	4	-3.5557	0.99943	0.99944	1	18360	0	-3.5557
COPB1	4	0.00016041	0.00062007	0.031146	372	3	-2.8236	0.42821	0.5747	1	10270	1	-2.8236
MCM2	4	0.00016129	0.00062112	0.031146	373	4	-2.2877	0.99958	0.99958	1	18393	0	-2.2877
ATP5B	4	0.00016132	0.00062112	0.031146	374	4	-0.94817	0.99984	0.99984	1	18479	0	-0.94817
COPS6	4	0.00016337	0.00062904	0.031423	375	4	-1.8769	0.9996	0.99959	1	18398	0	-1.8769
CCT7	4	0.00016378	0.0006301	0.031423	376	3	-1.9966	0.27494	0.41619	1	7693	1	-1.9966
KIF11	4	0.00016446	0.00063168	0.031423	377	4	-1.3417	0.99984	0.99984	1	18478	0	-1.3417
BUD13	4	0.00016533	0.00063432	0.031471	378	4	-1.1387	0.99983	0.99984	1	18477	0	-1.1387
ACTL6A	4	0.00017522	0.00066705	0.033008	379	4	-1.7409	0.99982	0.99983	1	18475	0	-1.7409
NVL	4	0.00017672	0.00067233	0.033181	380	4	-1.71	0.99982	0.99983	1	18474	0	-1.71
ABT1	4	0.00018333	0.00069028	0.033978	381	4	-1.6157	0.99057	0.99054	1	17856	0	-1.6157
ATP6V0B	4	0.00018622	0.00069662	0.0342	382	3	-2.0436	0.56699	0.64522	1	11433	1	-2.0436
DHX15	4	0.00018767	0.0007019	0.034369	383	3	-2.2902	0.98854	0.98855	1	17789	0	-2.2902
HMGCR	4	0.0001883	0.00070506	0.034434	384	4	-1.8815	0.99392	0.99394	1	17987	0	-1.8815
POLR3F	4	0.00019009	0.00071087	0.034589	385	4	-0.82769	0.99981	0.99981	1	18472	0	-0.82769
CCNK	4	0.00019039	0.00071193	0.034589	386	4	-1.2169	0.99931	0.99932	1	18336	0	-1.2169
DDX10	4	0.00019168	0.00071668	0.03473	387	4	-1.0833	0.99981	0.99981	1	18471	0	-1.0833
LSM8	4	0.00019229	0.00071879	0.034743	388	4	-2.8792	0.9957	0.99568	1	18057	0	-2.8792
TWISTNB	4	0.00019421	0.0007246	0.034933	389	3	-2.2427	0.5032	0.61449	1	10906	1	-2.2427
TERF2	4	0.00019651	0.00073727	0.035453	390	4	-1.0174	0.9998	0.9998	1	18470	0	-1.0174
RBM17	4	0.00019785	0.00074044	0.035514	391	4	-1.7549	0.99966	0.99966	1	18413	0	-1.7549
SMC2	4	0.00020198	0.00075839	0.036283	392	4	-2.3068	0.99958	0.99957	1	18391	0	-2.3068
PSMD2	4	0.00020439	0.00076683	0.036593	393	4	-1.621	0.9998	0.9998	1	18468	0	-1.621
DYNC1I2	4	0.00020506	0.00076947	0.036609	394	4	-1.6089	0.99903	0.99902	1	18297	0	-1.6089
NEDD1	4	0.00020551	0.00077106	0.036609	395	4	-2.0496	0.99979	0.99979	1	18467	0	-2.0496
ATP2A2	4	0.00020839	0.00078162	0.037016	396	4	-2.9641	0.99327	0.99329	1	17955	0	-2.9641
DCTN3	4	0.00020996	0.00078689	0.037172	397	3	-1.9024	0.76903	0.77419	1	13635	1	-1.9024
LSM3	4	0.00021356	0.00080009	0.037681	398	4	-1.4123	0.99979	0.99979	1	18464	0	-1.4123
DHODH	4	0.00021395	0.00080168	0.037681	399	4	-1.5031	0.99979	0.99979	1	18463	0	-1.5031
PRDX1	4	0.00021448	0.00080432	0.03769	400	4	-1.667	0.99912	0.99911	1	18309	0	-1.667
TUBGCP3	4	0.00021472	0.0008059	0.03769	401	4	-1.0897	0.99979	0.99979	1	18462	0	-1.0897
YARS2	4	0.00021851	0.0008191	0.038212	402	4	-1.1433	0.99978	0.99978	1	18461	0	-1.1433
SETD1A	4	0.00021968	0.00082174	0.03824	403	4	-1.152	0.99978	0.99978	1	18459	0	-1.152
WDR46	4	0.00022068	0.00082596	0.038272	404	4	-1.6531	0.9995	0.9995	1	18379	0	-1.6531
XAB2	4	0.00022096	0.00082649	0.038272	405	4	-1.1652	0.99978	0.99978	1	18458	0	-1.1652
CCDC84	4	0.00022277	0.00083283	0.038387	406	4	-1.4417	0.99571	0.99568	1	18058	0	-1.4417
HSD17B12	4	0.00022443	0.00083758	0.038387	407	4	-1.1611	0.99978	0.99978	1	18457	0	-1.1611
EBNA1BP2	4	0.00022464	0.00083863	0.038387	408	3	-1.4665	0.98757	0.98757	1	17752	0	-1.4665
TRAPPC1	4	0.00022511	0.00083916	0.038387	409	4	-1.8521	0.99946	0.99947	1	18366	0	-1.8521
EIF3H	4	0.00022582	0.00084074	0.038387	410	3	-1.5191	0.94238	0.94246	1	16673	0	-1.5191
MRPL18	4	0.00022593	0.00084127	0.038387	411	4	-1.2124	0.99977	0.99977	1	18456	0	-1.2124
GTF2H4	4	0.00023221	0.00086556	0.039352	412	4	-1.2012	0.99977	0.99977	1	18454	0	-1.2012
MCM7	4	0.00023242	0.00086661	0.039352	413	4	-1.7762	0.99977	0.99977	1	18453	0	-1.7762
ZNF574	4	0.0002344	0.00087189	0.039496	414	4	-1.4707	0.99934	0.99935	1	18341	0	-1.4707
UTP3	4	0.00023602	0.00087612	0.039544	415	4	-1.1774	0.99976	0.99977	1	18452	0	-1.1774
PSMB2	4	0.00023658	0.00087717	0.039544	416	4	-1.7128	0.99745	0.99744	1	18161	0	-1.7128
SBNO1	4	0.000238	0.00088087	0.039616	417	4	-1.218	0.99976	0.99976	1	18451	0	-1.218
SF3B1	4	0.00024188	0.00089776	0.040279	418	4	-1.4059	0.99976	0.99976	1	18450	0	-1.4059
TUT1	4	0.00024283	0.0009004	0.040299	419	4	-2.5962	0.99976	0.99976	1	18449	0	-2.5962
PHB	4	0.00024359	0.00090251	0.040299	420	2	-1.3957	0.96497	0.96503	1	17166	0	-1.3957
YARS	4	0.0002467	0.00091096	0.04058	421	4	-1.8598	0.9952	0.99519	1	18030	0	-1.8598
KARS	4	0.00025018	0.00092574	0.041141	422	4	-1.9171	0.99958	0.99958	1	18392	0	-1.9171
NOC3L	4	0.00025457	0.00094369	0.041839	423	4	-1.4488	0.99975	0.99975	1	18448	0	-1.4488
RPL37	4	0.00025506	0.00094792	0.041899	424	3	-1.9823	0.055675	0.13208	0.861505	2787	1	-1.9823
CDC7	4	0.00025556	0.0009495	0.041899	425	4	-2.0219	0.99974	0.99975	1	18447	0	-2.0219
NUP160	4	0.00025679	0.00095267	0.04194	426	3	-2.1986	0.61787	0.67274	1	11877	1	-2.1986
LUC7L3	4	0.000262	0.00096956	0.042584	427	4	-2.1873	0.99974	0.99974	1	18446	0	-2.1873
NUP107	4	0.00026413	0.00097854	0.042877	428	4	-1.7396	0.99974	0.99973	1	18444	0	-1.7396
THOC2	4	0.00026526	0.00098118	0.042885	429	4	-1.8754	0.99973	0.99973	1	18443	0	-1.8754
RPS19BP1	4	0.00026617	0.00098329	0.042885	430	4	-1.2332	0.99973	0.99973	1	18442	0	-1.2332
HECTD1	4	0.00026878	0.00099121	0.042977	431	4	-1.1392	0.99973	0.99973	1	18441	0	-1.1392
SKA1	4	0.00026896	0.00099174	0.042977	432	3	-2.0535	0.50606	0.61577	1	10926	1	-2.0535
PKMYT1	4	0.00026924	0.00099226	0.042977	433	4	-1.5664	0.99973	0.99973	1	18440	0	-1.5664
VPS18	4	0.00027315	0.0010081	0.043562	434	4	-0.99224	0.99973	0.99972	1	18439	0	-0.99224
UTP23	4	0.00027408	0.0010118	0.043621	435	3	-1.7429	0.75534	0.76324	1	13459	1	-1.7429
TUBGCP4	4	0.00028074	0.0010324	0.044407	436	4	-1.029	0.99972	0.99972	1	18438	0	-1.029
RBM22	4	0.000283	0.0010398	0.044622	437	3	-1.7974	0.79304	0.79476	1	13986	1	-1.7974
RANGAP1	4	0.00028753	0.0010546	0.045153	438	4	-2.03	0.99971	0.99971	1	18437	0	-2.03
PPP1R8	4	0.00028921	0.001063	0.045331	439	4	-1.0481	0.99971	0.99971	1	18436	0	-1.0481
ORC1	4	0.00028933	0.0010635	0.045331	440	4	-1.666	0.99931	0.99932	1	18335	0	-1.666
MED18	4	0.00029407	0.0010825	0.046036	441	3	-1.5926	0.42265	0.56887	1	10180	1	-1.5926
TM2D1	4	0.0002964	0.0010889	0.046075	442	4	-0.94393	0.9997	0.9997	1	18435	0	-0.94393
CCDC86	4	0.00029744	0.0010926	0.046075	443	4	-1.5841	0.99898	0.99897	1	18293	0	-1.5841
HINFP	4	0.00029773	0.0010931	0.046075	444	3	-2.0233	0.79464	0.79622	1	14017	1	-2.0233
DBR1	4	0.00029858	0.0010952	0.046075	445	4	-3.4522	0.99887	0.99885	1	18278	0	-3.4522
HIRA	4	0.00029886	0.0010957	0.046075	446	4	-1.4339	0.9997	0.9997	1	18434	0	-1.4339
UQCRC1	4	0.00029998	0.0010984	0.046083	447	4	-1.0485	0.9997	0.9997	1	18432	0	-1.0485
ANLN	4	0.00030242	0.0011105	0.046488	448	4	-2.2524	0.9996	0.99959	1	18402	0	-2.2524
TARS	4	0.00030396	0.0011153	0.046583	449	4	-1.1131	0.9997	0.99969	1	18431	0	-1.1131
DNM2	4	0.00030559	0.0011206	0.046684	450	4	-1.1545	0.99969	0.99969	1	18430	0	-1.1545
CDC5L	4	0.0003061	0.0011227	0.046684	451	4	-1.9533	0.99969	0.99969	1	18429	0	-1.9533
IARS	4	0.00030888	0.0011343	0.047063	452	3	-1.1504	0.98912	0.98912	1	17808	0	-1.1504
TACC3	4	0.00030989	0.0011385	0.047134	453	4	-1.6233	0.99969	0.99969	1	18428	0	-1.6233
CD5	4	0.00031266	0.0011485	0.047383	454	3	-1.3485	0.98836	0.98838	1	17780	0	-1.3485
HEXIM1	4	0.00031308	0.0011496	0.047383	455	4	-0.91274	0.99969	0.99968	1	18427	0	-0.91274
WDR1	4	0.00031488	0.0011554	0.047462	456	4	-1.8793	0.99969	0.99968	1	18426	0	-1.8793
ORAOV1	4	0.00031526	0.001158	0.047462	457	4	-2.3711	0.99968	0.99968	1	18425	0	-2.3711
PSMB3	4	0.00031559	0.0011591	0.047462	458	3	-1.2934	0.92201	0.92217	1	16277	0	-1.2934
ISCA2	4	0.00031746	0.0011654	0.047618	459	4	-0.96712	0.99968	0.99968	1	18424	0	-0.96712
AKIRIN2	4	0.00031979	0.0011728	0.047755	460	4	-1.1981	0.99968	0.99967	1	18422	0	-1.1981
YKT6	4	0.00032012	0.0011739	0.047755	461	4	-2.4943	0.99968	0.99967	1	18421	0	-2.4943
CENPE	4	0.00032209	0.0011802	0.047908	462	4	-1.6443	0.99948	0.99949	1	18371	0	-1.6443
CUL2	4	0.00032358	0.001186	0.04804	463	4	-0.80268	0.99968	0.99967	1	18420	0	-0.80268
HNRNPM	4	0.00032661	0.0011955	0.048321	464	4	-1.4814	0.99967	0.99966	1	18417	0	-1.4814
B3GAT3	4	0.00033287	0.0012166	0.049068	465	4	-0.80109	0.99967	0.99966	1	18414	0	-0.80109
UBE2I	4	0.00033414	0.0012224	0.049197	466	3	-1.5775	0.76238	0.76877	1	13541	1	-1.5775
FAM96B	4	0.00033536	0.0012267	0.049261	467	4	-1.1663	0.99779	0.99779	1	18186	0	-1.1663
EIF5B	4	0.00033772	0.0012314	0.049346	468	4	-1.4444	0.99966	0.99966	1	18412	0	-1.4444
NEDD8	4	0.00033842	0.0012351	0.049389	469	4	-1.5738	0.99632	0.99633	1	18090	0	-1.5738
UBA1	4	0.00034058	0.0012436	0.049621	470	3	-2.112	0.86574	0.86572	1	15224	0	-2.112
NUDCD3	4	0.00034167	0.0012478	0.049684	471	4	-1.445	0.99966	0.99965	1	18411	0	-1.445
SYF2	4	0.00034786	0.0012657	0.050292	472	4	-1.3984	0.99965	0.99965	1	18410	0	-1.3984
WDR70	4	0.00035055	0.0012747	0.050474	473	3	-1.9117	0.94252	0.9426	1	16676	0	-1.9117
SRPRA	4	0.00035118	0.0012784	0.050474	474	3	-1.485	0.98523	0.98524	1	17679	0	-1.485
NUP98	4	0.00035128	0.0012784	0.050474	475	4	-2.1084	0.99743	0.99742	1	18159	0	-2.1084
SACM1L	4	0.00036207	0.0013196	0.051991	476	4	-1.3916	0.99964	0.99963	1	18409	0	-1.3916
HCFC1	4	0.00036336	0.0013254	0.05211	477	4	-1.2417	0.99964	0.99963	1	18408	0	-1.2417
RPL3	4	0.00036501	0.0013323	0.05227	478	3	-2.183	0.91634	0.91642	1	16178	0	-2.183
VPS13D	4	0.00036537	0.0013354	0.052285	479	4	-1.3576	0.99963	0.99963	1	18407	0	-1.3576
TMCO6	4	0.00036782	0.0013476	0.052651	480	4	-1.1168	0.99963	0.99963	1	18406	0	-1.1168
URB2	4	0.00036977	0.0013555	0.05285	481	4	-1.5245	0.98933	0.98933	1	17814	0	-1.5245
UBAP2L	4	0.00037086	0.0013605	0.052857	482	4	-1.3383	0.99963	0.99962	1	18405	0	-1.3383
SCD	4	0.00037134	0.0013613	0.052857	483	3	-1.8852	0.10672	0.22673	0.914613	4552	1	-1.8852
WDR5	4	0.00037501	0.0013729	0.053197	484	3	-1.6949	0.96094	0.96097	1	17069	0	-1.6949
RNF113A	4	0.0003793	0.0013877	0.053659	485	3	-1.5691	0.699	0.72237	1	12763	1	-1.5691
EIF3E	4	0.00037996	0.0013914	0.053691	486	4	-1.0413	0.99962	0.99961	1	18404	0	-1.0413
NCAPH	4	0.0003863	0.0014083	0.054232	487	4	-1.706	0.99951	0.99951	1	18380	0	-1.706
ZNF335	4	0.00039169	0.0014305	0.054973	488	4	-1.6506	0.99959	0.99958	1	18395	0	-1.6506
POLR2B	4	0.00039611	0.0014452	0.055427	489	3	-2.1856	0.98823	0.98824	1	17775	0	-2.1856
MED22	4	0.0003985	0.0014516	0.055448	490	4	-1.004	0.9996	0.9996	1	18403	0	-1.004
SUPT16H	4	0.0003998	0.0014563	0.055448	491	3	-1.5567	0.9571	0.95714	1	16985	0	-1.5567
IARS2	4	0.00040096	0.0014595	0.055448	492	4	-1.4263	0.9996	0.99959	1	18400	0	-1.4263
YY1	4	0.00040142	0.00146	0.055448	493	4	-1.0466	0.9996	0.99959	1	18399	0	-1.0466
POLR3K	4	0.00040159	0.0014605	0.055448	494	4	-1.4461	0.99134	0.99135	1	17886	0	-1.4461
PPIL2	4	0.00040377	0.0014685	0.055636	495	2	-1.1901	0.68331	0.71215	1	12568	1	-1.1901
INTS2	4	0.00041165	0.0015033	0.056772	496	4	-1.6823	0.98996	0.98994	1	17844	0	-1.6823
KIF18A	4	0.000412	0.0015049	0.056772	497	3	-1.7577	0.95155	0.95162	1	16857	0	-1.7577
SUPV3L1	4	0.0004127	0.0015075	0.056772	498	3	-1.7322	0.80128	0.80222	1	14102	1	-1.7322
ATXN10	4	0.00041375	0.0015118	0.056817	499	4	-1.2702	0.99959	0.99958	1	18394	0	-1.2702
RPLP0	4	0.00041692	0.0015218	0.057079	500	3	-1.8471	0.55303	0.6382	1	11312	1	-1.8471
THOC3	4	0.00042544	0.0015482	0.057858	501	4	-1.6528	0.99815	0.99814	1	18205	0	-1.6528
NOP10	4	0.00042571	0.0015487	0.057858	502	4	-1.1365	0.99957	0.99957	1	18390	0	-1.1365
TYMS	4	0.00042903	0.0015614	0.058215	503	3	-2.1937	0.98683	0.98679	1	17729	0	-2.1937
NOP16	4	0.00043155	0.0015693	0.058394	504	4	-2.0832	0.99746	0.99744	1	18162	0	-2.0832
GTF2E2	4	0.00043383	0.0015814	0.05873	505	4	-1.3085	0.99957	0.99956	1	18389	0	-1.3085
DARS	4	0.00043553	0.0015857	0.05877	506	3	-2.8252	0.82872	0.82873	1	14561	0	-2.8252
NOL6	4	0.00043771	0.0015941	0.058967	507	4	-1.2642	0.99359	0.9936	1	17972	0	-1.2642
KIAA1429	4	0.0004399	0.0016026	0.059162	508	3	-1.7137	0.98806	0.98808	1	17767	0	-1.7137
TRAPPC11	4	0.00044446	0.00162	0.059688	509	3	-1.8045	0.48191	0.60482	1	10738	1	-1.8045
HAUS7	4	0.00044909	0.0016448	0.060483	510	4	-1.4282	0.99674	0.99676	1	18118	0	-1.4282
SPATA5L1	4	0.00045075	0.0016543	0.060714	511	4	-0.96096	0.99955	0.99955	1	18388	0	-0.96096
C1orf109	4	0.00045379	0.0016627	0.060905	512	4	-1.2692	0.99955	0.99955	1	18387	0	-1.2692
POLA2	4	0.0004543	0.001667	0.06094	513	4	-2.1486	0.99924	0.99924	1	18326	0	-2.1486
POLD1	4	0.00045579	0.0016723	0.061014	514	4	-1.5764	0.99422	0.99425	1	17998	0	-1.5764
PSMA3	4	0.00045803	0.001677	0.061069	515	4	-1.1773	0.99954	0.99954	1	18385	0	-1.1773
VARS	4	0.00046635	0.0017108	0.062179	516	3	-2.0213	0.98766	0.98766	1	17758	0	-2.0213
UBIAD1	4	0.00047245	0.0017345	0.062716	517	4	-1.4198	0.99769	0.99769	1	18177	0	-1.4198
LSM4	4	0.00047268	0.0017351	0.062716	518	4	-1.1289	0.99953	0.99953	1	18384	0	-1.1289
UQCRC2	4	0.00047303	0.0017356	0.062716	519	4	-0.91746	0.99953	0.99952	1	18383	0	-0.91746
PELO	4	0.00047671	0.0017467	0.062995	520	4	-0.89677	0.99952	0.99952	1	18382	0	-0.89677
GTF2H1	4	0.00047821	0.0017536	0.063121	521	3	-1.7207	0.93131	0.93146	1	16469	0	-1.7207
BUD31	4	0.00048208	0.0017673	0.063493	522	4	-2.369	0.99789	0.99788	1	18196	0	-2.369
DAD1	4	0.0004929	0.0018021	0.064612	523	3	-2.2516	0.98693	0.9869	1	17735	0	-2.2516
MRPL14	4	0.00049382	0.0018053	0.064612	524	3	-1.3659	0.95342	0.95348	1	16901	0	-1.3659
IDH3A	4	0.00050487	0.0018438	0.06574	525	4	-0.88122	0.9995	0.9995	1	18378	0	-0.88122
TPSG1	4	0.00050505	0.0018438	0.06574	526	4	-0.91202	0.99949	0.99949	1	18377	0	-0.91202
SLC4A7	4	0.00050909	0.0018549	0.06601	527	4	-0.88624	0.99949	0.99949	1	18376	0	-0.88624
TPX2	4	0.00051205	0.0018697	0.06641	528	4	-0.97741	0.99949	0.99949	1	18375	0	-0.97741
BICDL2	4	0.00051298	0.0018734	0.066415	529	4	-0.83892	0.99949	0.99949	1	18374	0	-0.83892
CWC22	4	0.00051576	0.0018824	0.066608	530	4	-1.6789	0.99948	0.99949	1	18373	0	-1.6789
SSU72	4	0.00052233	0.0019072	0.067358	531	4	-1.62	0.99934	0.99935	1	18340	0	-1.62
TBCB	4	0.00053014	0.0019304	0.068051	532	3	-1.3887	0.9642	0.96427	1	17148	0	-1.3887
HUWE1	4	0.00053215	0.0019394	0.06813	533	4	-1.5066	0.99947	0.99948	1	18370	0	-1.5066
WAPL	4	0.00053221	0.0019399	0.06813	534	4	-1.9172	0.98926	0.98926	1	17812	0	-1.9172
SLBP	4	0.00053618	0.0019542	0.068502	535	2	-1.0553	0.45705	0.59388	1	10570	1	-1.0553
DMAP1	4	0.00053905	0.0019621	0.068651	536	4	-1.1321	0.99946	0.99947	1	18369	0	-1.1321
PSMB4	4	0.00054078	0.0019695	0.068709	537	4	-1.2609	0.99946	0.99947	1	18368	0	-1.2609
PRELID1	4	0.00054179	0.0019711	0.068709	538	3	-2.0863	0.60694	0.66659	1	11768	1	-2.0863
SKA3	4	0.00054388	0.001979	0.068857	539	4	-0.71143	0.99946	0.99947	1	18367	0	-0.71143
LARS	4	0.00054536	0.0019843	0.068913	540	4	-1.4202	0.9973	0.99729	1	18150	0	-1.4202
NOP14	4	0.0005464	0.0019895	0.068968	541	4	-0.99754	0.99945	0.99946	1	18365	0	-0.99754
RPS4X	4	0.00054895	0.0019964	0.069079	542	3	-2.369	0.60184	0.6638	1	11722	1	-2.369
PSMA6	4	0.00055318	0.0020112	0.069462	543	3	-1.8691	0.60988	0.66824	1	11797	1	-1.8691
RTF1	4	0.00055678	0.0020286	0.069935	544	4	-1.747	0.99944	0.99945	1	18363	0	-1.747
PPP1CB	4	0.0005673	0.0020803	0.071587	545	4	-1.8741	0.99943	0.99944	1	18362	0	-1.8741
DDX59	4	0.0005685	0.0020856	0.071637	546	4	-1.6246	0.99943	0.99944	1	18361	0	-1.6246
CEP192	4	0.00057687	0.0021126	0.072281	547	4	-1.6411	0.9908	0.99078	1	17869	0	-1.6411
EXOSC4	4	0.00057818	0.0021157	0.072281	548	3	-1.5056	0.98874	0.98876	1	17798	0	-1.5056
TBL3	4	0.00057862	0.0021173	0.072281	549	4	-2.0062	0.99877	0.99875	1	18268	0	-2.0062
TMEM258	4	0.00057994	0.0021221	0.072281	550	4	-1.3423	0.99306	0.99307	1	17948	0	-1.3423
CDC40	4	0.00058081	0.0021236	0.072281	551	3	-2.0876	0.98358	0.98357	1	17631	0	-2.0876
SPCS2	4	0.00059416	0.0021643	0.073531	552	4	-1.1902	0.99941	0.99942	1	18358	0	-1.1902
GOSR2	4	0.0005952	0.0021696	0.073577	553	4	-1.4365	0.9994	0.99942	1	18357	0	-1.4365
DHX30	4	0.0006004	0.002188	0.074009	554	4	-0.94823	0.9994	0.99942	1	18355	0	-0.94823
MAD2L1	4	0.00060212	0.0021933	0.074009	555	3	-2.1325	0.81639	0.81649	1	14352	1	-2.1325
RRM1	4	0.00060332	0.0021976	0.074009	556	4	-1.7986	0.9994	0.99941	1	18353	0	-1.7986
SPCS3	4	0.00060374	0.0021981	0.074009	557	4	-1.6133	0.9994	0.99941	1	18352	0	-1.6133
PSMA2	4	0.00060662	0.0022097	0.074266	558	3	-1.5975	0.91887	0.91893	1	16227	0	-1.5975
COPS2	4	0.00061048	0.0022239	0.074612	559	4	-0.90563	0.99939	0.99941	1	18351	0	-0.90563
CEBPZ	4	0.00061569	0.002243	0.075115	560	3	-1.4971	0.97081	0.97091	1	17302	0	-1.4971
TCP1	4	0.00061769	0.0022525	0.075299	561	4	-1.8144	0.99938	0.9994	1	18350	0	-1.8144
DIDO1	4	0.00062669	0.0022815	0.076134	562	4	-1.0156	0.99937	0.99938	1	18348	0	-1.0156
ZDHHC7	4	0.00063101	0.0022957	0.07622	563	4	-0.77443	0.99937	0.99938	1	18347	0	-0.77443
XRCC6	4	0.00063131	0.0022963	0.07622	564	4	-1.7178	0.99353	0.99355	1	17970	0	-1.7178
RBX1	4	0.00063141	0.0022963	0.07622	565	4	-1.8901	0.9962	0.9962	1	18084	0	-1.8901
ANKRD17	4	0.00064433	0.0023422	0.077607	566	4	-1.2875	0.99936	0.99937	1	18346	0	-1.2875
UTP15	4	0.00064697	0.0023496	0.077715	567	4	-1.8737	0.99935	0.99937	1	18345	0	-1.8737
NUDC	4	0.00065362	0.0023744	0.078364	568	4	-1.6118	0.99935	0.99936	1	18344	0	-1.6118
DNMT1	4	0.00065451	0.0023776	0.078364	569	4	-0.94982	0.99935	0.99936	1	18343	0	-0.94982
NUBP1	4	0.00065618	0.0023823	0.078383	570	3	-1.8229	0.96312	0.96316	1	17120	0	-1.8229
CARS	4	0.00065875	0.0023918	0.078558	571	4	-1.3576	0.99934	0.99935	1	18342	0	-1.3576
IMP3	4	0.00066317	0.0024077	0.07894	572	2	-1.1413	0.93963	0.93974	1	16623	0	-1.1413
CACNA1H	4	0.00066706	0.0024219	0.079148	573	4	-1.0497	0.99933	0.99935	1	18339	0	-1.0497
RPL10A	4	0.00066717	0.0024225	0.079148	574	3	-1.3367	0.72236	0.73855	1	13057	1	-1.3367
NSF	4	0.0006691	0.0024314	0.079303	575	3	-1.4645	0.94516	0.94518	1	16728	0	-1.4645
INTS5	4	0.00067205	0.0024399	0.07944	576	4	-1.637	0.99933	0.99934	1	18338	0	-1.637
INTS4	4	0.00068693	0.0024953	0.081104	577	4	-1.1307	0.99931	0.99933	1	18337	0	-1.1307
TICRR	4	0.00069345	0.0025201	0.081769	578	3	-1.2393	0.8983	0.89826	1	15812	0	-1.2393
MED9	4	0.00069569	0.002527	0.081828	579	4	-1.0089	0.9941	0.99413	1	17994	0	-1.0089
CCDC127	4	0.00069691	0.0025307	0.081828	580	4	-1.1047	0.9993	0.99932	1	18334	0	-1.1047
KIN	4	0.00070335	0.0025513	0.082352	581	3	-1.6478	0.10797	0.22895	0.915375	4594	1	-1.6478
UBR4	4	0.00070488	0.0025597	0.082426	582	4	-1.2306	0.9993	0.99931	1	18333	0	-1.2306
ATP6V0E1	4	0.00070511	0.0025624	0.082426	583	4	-1.0329	0.99929	0.99931	1	18332	0	-1.0329
NOM1	4	0.00070734	0.0025708	0.082556	584	3	-1.6339	0.60456	0.66529	1	11749	1	-1.6339
ATP1B3	4	0.00071485	0.0026004	0.083221	585	3	-1.355	0.98488	0.98489	1	17669	0	-1.355
CCT6A	4	0.00071487	0.0026004	0.083221	586	3	-1.6414	0.98632	0.9863	1	17714	0	-1.6414
NUP88	4	0.00071787	0.0026056	0.083248	587	3	-1.3117	0.97724	0.97745	1	17448	0	-1.3117
PCYT1A	4	0.00072544	0.0026305	0.083897	588	3	-1.4338	0.24124	0.38145	0.995058	7126	1	-1.4338
USO1	4	0.00074323	0.0026938	0.085627	589	3	-1.5583	0.96964	0.9697	1	17276	0	-1.5583
CWC25	4	0.00074329	0.0026938	0.085627	590	4	-0.81954	0.99926	0.99926	1	18331	0	-0.81954
FIP1L1	4	0.00075042	0.0027181	0.086253	591	4	-1.0861	0.99925	0.99925	1	18330	0	-1.0861
RAD21	4	0.00075373	0.0027308	0.086508	592	4	-1.5987	0.9987	0.99868	1	18259	0	-1.5987
PAXBP1	4	0.00075487	0.002736	0.086529	593	4	-1.3784	0.99925	0.99925	1	18329	0	-1.3784
NFYA	4	0.00075859	0.0027477	0.08675	594	4	-1.1088	0.99924	0.99924	1	18328	0	-1.1088
SLC12A7	4	0.00076313	0.002763	0.087087	595	3	-1.3366	0.97579	0.97597	1	17413	0	-1.3366
ADAMTS10	4	0.00076508	0.0027714	0.08711	596	4	-0.75047	0.99923	0.99923	1	18325	0	-0.75047
CDT1	4	0.00076576	0.002773	0.08711	597	3	-1.8444	0.17222	0.31007	0.960786	5977	1	-1.8444
DNAJC8	4	0.00076834	0.0027841	0.087312	598	4	-1.302	0.99923	0.99923	1	18324	0	-1.302
ELAVL3	4	0.00077539	0.0028078	0.087911	599	4	-1.1877	0.99922	0.99922	1	18323	0	-1.1877
ZC3H3	4	0.00078555	0.0028406	0.088787	600	4	-0.83853	0.99921	0.99921	1	18322	0	-0.83853
RBM42	4	0.00078759	0.002849	0.08887	601	4	-1.4555	0.99921	0.99921	1	18321	0	-1.4555
NUDT21	4	0.00078859	0.0028527	0.08887	602	4	-1.4745	0.9992	0.9992	1	18320	0	-1.4745
NUP85	4	0.00079047	0.0028601	0.088953	603	4	-2.1048	0.99643	0.99644	1	18100	0	-2.1048
UBL5	4	0.00079972	0.0028934	0.089838	604	4	-1.4078	0.99105	0.99104	1	17880	0	-1.4078
MFN2	4	0.00080357	0.0029087	0.089964	605	4	-0.83503	0.9992	0.99919	1	18319	0	-0.83503
RPP40	4	0.00080409	0.0029103	0.089964	606	4	-1.2833	0.9992	0.99919	1	18318	0	-1.2833
GMPS	4	0.00080513	0.0029119	0.089964	607	4	-0.93899	0.99919	0.99919	1	18317	0	-0.93899
SRSF7	4	0.00080696	0.0029166	0.089964	608	3	-1.8273	0.92508	0.92525	1	16342	0	-1.8273
DDX54	4	0.00081322	0.0029346	0.090369	609	4	-1.1495	0.99919	0.99918	1	18316	0	-1.1495
PCBP1	4	0.00082296	0.0029662	0.091195	610	4	-1.2751	0.99918	0.99917	1	18315	0	-1.2751
RNPC3	4	0.00082985	0.0029916	0.091823	611	4	-1.5148	0.99917	0.99916	1	18314	0	-1.5148
MTPAP	4	0.00083392	0.0030074	0.092158	612	3	-1.5339	0.95936	0.95943	1	17034	0	-1.5339
EXOSC5	4	0.00083947	0.0030296	0.092687	613	4	-0.90985	0.99916	0.99915	1	18313	0	-0.90985
GTF3C1	4	0.00084959	0.0030708	0.093793	614	3	-1.287	0.53752	0.63055	1	11186	1	-1.287
CSNK2B	4	0.00085405	0.0030882	0.094019	615	4	-0.85118	0.99915	0.99914	1	18312	0	-0.85118
ZC3H8	4	0.00085467	0.0030882	0.094019	616	3	-2.0173	0.98882	0.98882	1	17799	0	-2.0173
CCDC12	4	0.00085863	0.0031014	0.094268	617	3	-1.4668	0.26812	0.40919	1	7581	1	-1.4668
SNAPC1	4	0.00086209	0.0031156	0.094548	618	3	-1.6134	0.40217	0.5477	1	9853	1	-1.6134
MED20	4	0.00086374	0.0031209	0.094555	619	3	-1.985	0.84612	0.84605	1	14856	0	-1.985
B3GALT5	4	0.0008713	0.0031515	0.095329	620	4	-0.76609	0.99913	0.99912	1	18310	0	-0.76609
INCENP	4	0.00087402	0.0031626	0.09551	621	4	-1.3844	0.99843	0.99842	1	18231	0	-1.3844
TRIP13	4	0.00087822	0.0031832	0.095951	622	4	-1.3781	0.99912	0.99911	1	18308	0	-1.3781
ILF2	4	0.00087949	0.0031874	0.095951	623	3	-0.94568	0.95458	0.95462	1	16921	0	-0.94568
GEMIN4	4	0.0008815	0.0031969	0.096082	624	3	-1.3591	0.97813	0.97831	1	17466	0	-1.3591
MCRS1	4	0.00088728	0.0032149	0.096467	625	3	-1.704	0.32177	0.46449	1	8487	1	-1.704
CINP	4	0.00089106	0.0032239	0.096554	626	4	-0.80483	0.99911	0.9991	1	18307	0	-0.80483
U2SURP	4	0.00089302	0.0032281	0.096554	627	4	-1.0068	0.99911	0.9991	1	18306	0	-1.0068
EXOSC7	4	0.00089733	0.0032397	0.096601	628	3	-1.1883	0.96046	0.96052	1	17055	0	-1.1883
NUP93	4	0.00090035	0.0032492	0.096601	629	4	-1.2917	0.9991	0.99909	1	18305	0	-1.2917
CRCP	4	0.000901	0.0032497	0.096601	630	3	-1.7646	0.93605	0.93609	1	16548	0	-1.7646
DHX33	4	0.00090177	0.0032503	0.096601	631	4	-0.95924	0.9991	0.99909	1	18304	0	-0.95924
CWF19L2	4	0.0009077	0.0032687	0.096997	632	3	-1.0805	0.97116	0.97128	1	17312	0	-1.0805
FAM32A	4	0.00091833	0.0033078	0.098001	633	3	-1.7281	0.97886	0.97901	1	17491	0	-1.7281
RPL4	4	0.00092476	0.0033384	0.098721	634	4	-1.5961	0.99505	0.99504	1	18027	0	-1.5961
ARGLU1	4	0.00092723	0.0033427	0.098721	635	4	-1.2738	0.99907	0.99906	1	18303	0	-1.2738
TGIF1	4	0.00094001	0.0033875	0.099889	636	4	-1.0376	0.99906	0.99905	1	18302	0	-1.0376
RANBP2	4	0.00094382	0.0034002	0.100026	637	4	-1.1673	0.99906	0.99905	1	18301	0	-1.1673
PRMT1	4	0.0009447	0.0034028	0.100026	638	4	-0.98454	0.99906	0.99905	1	18300	0	-0.98454
USPL1	4	0.00095382	0.0034361	0.100846	639	4	-1.2	0.99905	0.99904	1	18299	0	-1.2
PDCD6	4	0.0009633	0.0034688	0.101648	640	4	-1.0716	0.99904	0.99903	1	18298	0	-1.0716
HTATSF1	4	0.00097114	0.0035005	0.102303	641	2	-1.1981	0.44512	0.5887	1	10484	1	-1.1981
CHERP	4	0.00097205	0.0035021	0.102303	642	3	-1.8049	0.97538	0.97556	1	17400	0	-1.8049
CENPC	4	0.00098254	0.0035369	0.10316	643	3	-1.7869	0.86566	0.86563	1	15222	0	-1.7869
SDE2	4	0.00098812	0.0035586	0.10363	644	3	-1.7723	0.96681	0.96688	1	17209	0	-1.7723
FPGS	4	0.00099858	0.0035924	0.10429	645	4	-0.8697	0.999	0.99899	1	18295	0	-0.8697
CLNS1A	4	0.0010103	0.0036335	0.105322	646	3	-1.7529	0.50894	0.61708	1	10947	1	-1.7529
ATP5O	4	0.0010136	0.0036452	0.105394	647	4	-0.80631	0.99899	0.99897	1	18294	0	-0.80631
SMG5	4	0.0010145	0.0036473	0.105394	648	4	-1.6287	0.99413	0.99416	1	17995	0	-1.6287
TCERG1	4	0.0010167	0.0036557	0.105476	649	4	-0.96202	0.99898	0.99897	1	18292	0	-0.96202
PABPN1	4	0.0010189	0.0036663	0.105618	650	3	-1.1752	0.79014	0.79217	1	13943	1	-1.1752
SEH1L	4	0.0010236	0.0036819	0.105904	651	4	-1.1284	0.99898	0.99896	1	18291	0	-1.1284
SNAPC5	4	0.001027	0.0036927	0.105966	652	2	-0.61014	0.80957	0.80991	1	14239	1	-0.61014
TIMM44	4	0.0010278	0.0036953	0.105966	653	4	-2.3515	0.99857	0.99853	1	18244	0	-2.3515
SNRPB	4	0.0010316	0.0037143	0.106349	654	3	-1.2647	0.2962	0.43816	1	8035	1	-1.2647
SRSF3	4	0.0010375	0.0037354	0.106643	655	3	-1.4299	0.22537	0.36515	0.989253	6866	1	-1.4299
NDUFA13	4	0.001038	0.003736	0.106643	656	4	-1.3852	0.99896	0.99895	1	18290	0	-1.3852
KAT8	4	0.0010432	0.0037592	0.107143	657	4	-1.8464	0.99867	0.99863	1	18256	0	-1.8464
NFU1	4	0.0010468	0.0037766	0.107476	658	4	-1.1384	0.99895	0.99894	1	18289	0	-1.1384
GTF2A1	4	0.001049	0.0037824	0.107478	659	4	-1.1153	0.99104	0.99104	1	17879	0	-1.1153
TIMM23	4	0.0010506	0.0037903	0.10754	660	4	-0.92902	0.99895	0.99894	1	18288	0	-0.92902
SPTLC2	4	0.0010531	0.0038009	0.107677	661	4	-0.80029	0.99895	0.99893	1	18287	0	-0.80029
POLR3H	4	0.0010587	0.0038215	0.108097	662	4	-1.3512	0.99565	0.99563	1	18055	0	-1.3512
NSMCE3	4	0.0010691	0.00386	0.109023	663	4	-0.7792	0.99893	0.99892	1	18286	0	-0.7792
DNAJA3	4	0.0010836	0.0039144	0.110392	664	4	-1.4406	0.99659	0.99662	1	18109	0	-1.4406
TTF1	4	0.0010948	0.0039561	0.111401	665	4	-1.1373	0.99891	0.99889	1	18285	0	-1.1373
EIF2S2	4	0.001101	0.0039778	0.111843	666	4	-0.87261	0.9989	0.99888	1	18284	0	-0.87261
ALG14	4	0.0011033	0.0039878	0.111844	667	4	-0.99724	0.9989	0.99888	1	18283	0	-0.99724
SYMPK	4	0.0011061	0.0039941	0.111844	668	4	-2.0249	0.99587	0.99584	1	18067	0	-2.0249
CHMP6	4	0.0011069	0.0039957	0.111844	669	3	-1.37	0.81486	0.81498	1	14329	1	-1.37
NKX2-8	4	0.0011149	0.0040253	0.112331	670	4	-0.77234	0.99889	0.99887	1	18282	0	-0.77234
MIS12	4	0.0011159	0.0040274	0.112331	671	4	-1.5583	0.99888	0.99887	1	18281	0	-1.5583
ATP6V0D1	4	0.0011172	0.0040311	0.112331	672	4	-1.2336	0.99888	0.99886	1	18280	0	-1.2336
TMED2	4	0.0011195	0.0040411	0.112417	673	4	-1.4235	0.99888	0.99886	1	18279	0	-1.4235
SF3A1	4	0.0011217	0.0040461	0.112417	674	3	-1.2162	0.98249	0.98253	1	17605	0	-1.2162
YTHDC1	4	0.0011278	0.0040622	0.112697	675	4	-2.0049	0.99649	0.99651	1	18103	0	-2.0049
PLRG1	4	0.0011349	0.0040886	0.113262	676	4	-1.8605	0.99887	0.99885	1	18277	0	-1.8605
GLIS2	4	0.0011393	0.004105	0.113547	677	4	-1.1985	0.99886	0.99884	1	18276	0	-1.1985
IGF1R	4	0.0011468	0.0041325	0.114138	678	3	-1.3487	0.90104	0.90104	1	15868	0	-1.3487
TTI2	4	0.0011585	0.0041773	0.115208	679	4	-1.2765	0.99806	0.99805	1	18203	0	-1.2765
WDR83	4	0.0011599	0.0041842	0.115228	680	3	-1.0824	0.96484	0.9649	1	17161	0	-1.0824
FNTA	4	0.0011631	0.0041958	0.115326	681	4	-0.73642	0.99884	0.99882	1	18274	0	-0.73642
MED24	4	0.0011645	0.0042	0.115326	682	4	-0.66482	0.99884	0.99882	1	18273	0	-0.66482
BANF1	4	0.0011696	0.0042159	0.115591	683	3	-1.2064	0.73	0.74399	1	13147	1	-1.2064
PNO1	4	0.0011752	0.0042338	0.115914	684	3	-1.169	0.82208	0.82208	1	14457	1	-1.169
OXA1L	4	0.0011905	0.0042834	0.116989	685	3	-0.88614	0.96298	0.96302	1	17117	0	-0.88614
DCAF15	4	0.0011912	0.0042856	0.116989	686	3	-1.0417	0.98762	0.98762	1	17755	0	-1.0417
INTS7	4	0.0012103	0.0043595	0.118833	687	3	-1.1319	0.72348	0.73937	1	13068	1	-1.1319
POLR2I	4	0.001222	0.0043969	0.119445	688	4	-2.1194	0.99786	0.99785	1	18192	0	-2.1194
ATP6V1F	4	0.0012243	0.0044038	0.119445	689	4	-1.7386	0.99794	0.99793	1	18197	0	-1.7386
PDCD2	4	0.0012257	0.0044091	0.119445	690	4	-1.2083	0.99877	0.99876	1	18272	0	-1.2083
PRPF38B	4	0.0012264	0.0044101	0.119445	691	4	-1.6343	0.99877	0.99875	1	18271	0	-1.6343
CDCA8	4	0.0012274	0.0044149	0.119445	692	4	-0.92557	0.99877	0.99875	1	18270	0	-0.92557
ATP6V1C1	4	0.0012296	0.0044207	0.119445	693	4	-0.82769	0.99877	0.99875	1	18269	0	-0.82769
TFAP2A	4	0.0012328	0.0044323	0.119445	694	4	-0.63678	0.99877	0.99875	1	18267	0	-0.63678
HSF1	4	0.0012332	0.0044328	0.119445	695	4	-1.5597	0.99877	0.99875	1	18266	0	-1.5597
WDR82	4	0.0012382	0.004454	0.119842	696	4	-1.4511	0.99876	0.99874	1	18264	0	-1.4511
DLGAP4	4	0.0012447	0.004473	0.120181	697	4	-0.96831	0.99876	0.99874	1	18263	0	-0.96831
ADSS	4	0.0012701	0.0045601	0.122284	698	4	-1.741	0.99873	0.99871	1	18261	0	-1.741
COX17	4	0.0012712	0.0045643	0.122284	699	4	-0.97272	0.99873	0.99871	1	18260	0	-0.97272
PFAS	4	0.0012989	0.0046546	0.124525	700	3	-1.7426	0.91518	0.91527	1	16157	0	-1.7426
TOP3A	4	0.0013071	0.0046826	0.125058	701	4	-1.1377	0.99827	0.99826	1	18218	0	-1.1377
ESF1	4	0.0013082	0.0046878	0.125058	702	4	-1.0551	0.99869	0.99866	1	18257	0	-1.0551
NUMA1	4	0.0013289	0.0047575	0.126557	703	4	-1.2957	0.99857	0.99853	1	18243	0	-1.2957
MRPL27	4	0.0013407	0.0047955	0.127238	704	4	-1.1744	0.99866	0.99862	1	18255	0	-1.1744
TUBGCP6	4	0.0013433	0.0048035	0.127238	705	3	-2.8768	0.94383	0.94394	1	16705	0	-2.8768
PDCD6IP	4	0.0013464	0.0048151	0.127242	706	4	-1.1047	0.99865	0.99862	1	18254	0	-1.1047
IK	4	0.0013471	0.0048172	0.127242	707	3	-1.0243	0.9763	0.9765	1	17429	0	-1.0243
PPP2R1A	4	0.0013484	0.0048246	0.127258	708	2	-1.2673	0.74956	0.75864	1	13393	1	-1.2673
TWNK	4	0.0013556	0.0048499	0.127746	709	4	-1.0242	0.99864	0.99861	1	18253	0	-1.0242
RCL1	4	0.0013716	0.0049025	0.128949	710	4	-1.1859	0.99836	0.99834	1	18227	0	-1.1859
FAM107A	4	0.0013742	0.0049106	0.128983	711	4	-0.99359	0.99863	0.99859	1	18252	0	-0.99359
MICAL2	4	0.0013882	0.0049587	0.130018	712	4	-0.90305	0.99861	0.99857	1	18250	0	-0.90305
SNAPC4	4	0.0013902	0.0049655	0.130018	713	4	-1.1887	0.99525	0.99524	1	18037	0	-1.1887
MED26	4	0.0013913	0.0049708	0.130018	714	4	-1.1941	0.99861	0.99857	1	18249	0	-1.1941
PPWD1	4	0.001405	0.005022	0.131174	715	3	-1.7373	0.98271	0.98276	1	17612	0	-1.7373
DEXI	4	0.0014098	0.00504	0.13146	716	4	-0.95644	0.99859	0.99855	1	18248	0	-0.95644
TUBG1	4	0.0014128	0.0050484	0.131498	717	3	-1.2197	0.84091	0.84081	1	14765	0	-1.2197
ZPR1	4	0.0014167	0.0050637	0.131713	718	3	-1.6965	0.77556	0.77954	1	13733	1	-1.6965
DGCR14	4	0.0014209	0.0050759	0.131846	719	4	-1.4238	0.99858	0.99855	1	18247	0	-1.4238
DCP1A	4	0.0014237	0.0050849	0.131897	720	4	-1.0441	0.99858	0.99854	1	18246	0	-1.0441
MRPS16	4	0.0014285	0.0051028	0.13218	721	4	-0.85253	0.99857	0.99853	1	18245	0	-0.85253
UBA52	4	0.001441	0.0051477	0.133158	722	3	-1.339	0.97011	0.97017	1	17286	0	-1.339
NAA15	4	0.0014446	0.0051577	0.133234	723	4	-0.79695	0.99856	0.99852	1	18242	0	-0.79695
NEPRO	4	0.0014492	0.0051735	0.133459	724	4	-1.3911	0.99062	0.99061	1	17861	0	-1.3911
LRP8	4	0.0014628	0.00522	0.134219	725	4	-0.83343	0.99854	0.9985	1	18240	0	-0.83343
SP9	4	0.0014632	0.0052216	0.134219	726	4	-0.81668	0.99854	0.9985	1	18239	0	-0.81668
OPA3	4	0.0014653	0.0052269	0.134219	727	4	-0.5913	0.99853	0.9985	1	18238	0	-0.5913
HAUS6	4	0.0014669	0.0052316	0.134219	728	3	-1.1754	0.81026	0.81057	1	14254	1	-1.1754
PDCD7	4	0.0014701	0.0052427	0.134319	729	4	-0.93298	0.99853	0.9985	1	18237	0	-0.93298
SPI1	4	0.001473	0.0052522	0.134379	730	4	-1.2836	0.99853	0.9985	1	18236	0	-1.2836
RPP30	4	0.0014936	0.0053245	0.135755	731	3	-1.2857	0.03508	0.091192	0.823074	2003	1	-1.2857
CLPP	4	0.0014948	0.0053272	0.135755	732	4	-0.72994	0.99851	0.99848	1	18235	0	-0.72994
ICE1	4	0.0014952	0.0053277	0.135755	733	4	-0.99447	0.9985	0.99848	1	18234	0	-0.99447
RNPS1	4	0.0015009	0.0053478	0.136082	734	4	-2.0219	0.99724	0.99723	1	18144	0	-2.0219
LARS2	4	0.0015239	0.0054423	0.138299	735	4	-1.0828	0.99099	0.99098	1	17875	0	-1.0828
UPF2	4	0.0015294	0.0054607	0.13858	736	4	-1.5175	0.99847	0.99844	1	18233	0	-1.5175
EIF2S3	4	0.001543	0.0055003	0.139397	737	4	-1.146	0.99307	0.99308	1	17949	0	-1.146
POP1	4	0.0015488	0.0055215	0.1395	738	3	-1.3692	0.97335	0.97352	1	17360	0	-1.3692
ISCU	4	0.0015495	0.0055262	0.1395	739	2	-2.173	0.98155	0.9816	1	17577	0	-2.173
RFC2	4	0.0015495	0.0055267	0.1395	740	3	-1.1853	0.98388	0.98388	1	17639	0	-1.1853
GTF3A	4	0.0015572	0.0055494	0.139885	741	3	-1.2292	0.95687	0.95692	1	16980	0	-1.2292
CAVIN3	4	0.0015597	0.0055574	0.139896	742	3	-1.0033	0.92354	0.92372	1	16313	0	-1.0033
MCM4	4	0.0015634	0.00557	0.140027	743	4	-1.167	0.99844	0.99842	1	18232	0	-1.167
SH3BP1	4	0.0015771	0.0056218	0.14103	744	4	-0.87751	0.99842	0.99841	1	18230	0	-0.87751
ZC3H13	4	0.0015778	0.0056249	0.14103	745	3	-1.0648	0.97412	0.97427	1	17367	0	-1.0648
KAT5	4	0.0015849	0.0056503	0.141476	746	4	-1.4656	0.99188	0.9919	1	17907	0	-1.4656
HNRNPH1	4	0.0015879	0.005663	0.141604	747	4	-1.2479	0.99841	0.99839	1	18229	0	-1.2479
MARS2	4	0.0015934	0.0056835	0.14193	748	4	-1.2134	0.99693	0.99696	1	18132	0	-1.2134
TAF7	4	0.0016012	0.0057115	0.142439	749	3	-1.793	0.93686	0.93693	1	16567	0	-1.793
NOP58	4	0.0016113	0.0057532	0.143288	750	3	-1.4528	0.16393	0.30138	0.956036	5836	1	-1.4528
RAD51	4	0.0016371	0.0058509	0.145527	751	3	-1.4079	0.84854	0.84848	1	14903	0	-1.4079
VPS72	4	0.0016427	0.0058662	0.145715	752	4	-1.2175	0.99836	0.99834	1	18228	0	-1.2175
SYCP2L	4	0.001652	0.0058963	0.146269	753	4	-0.81127	0.99835	0.99833	1	18226	0	-0.81127
MRPS15	4	0.0016649	0.0059364	0.14707	754	3	-1.1407	0.27087	0.41199	1	7630	1	-1.1407
HEATR1	4	0.0016825	0.005994	0.148169	755	3	-1.1493	0.84082	0.84073	1	14762	0	-1.1493
GTF2F2	4	0.0016834	0.0059966	0.148169	756	3	-1.0146	0.70557	0.72678	1	12845	1	-1.0146
RPL35A	3	0.0016867	0.0048003	0.127238	757	2	-2.4984	0.87829	0.87838	1	15426	0	-2.4984
BUB1	4	0.0016957	0.0060436	0.149134	758	4	-0.97778	0.9983	0.99829	1	18225	0	-0.97778
CIT	4	0.0017062	0.0060758	0.149731	759	4	-1.5948	0.99829	0.99829	1	18224	0	-1.5948
ERH	4	0.0017179	0.0061154	0.150507	760	2	-0.60414	0.0055104	0.019029	0.663375	504	1	-0.60414
S1PR5	4	0.0017199	0.0061233	0.150507	761	4	-0.86885	0.99828	0.99827	1	18223	0	-0.86885
YPEL5	4	0.0017282	0.0061619	0.150964	762	4	-0.62239	0.99827	0.99826	1	18221	0	-0.62239
CC2D1B	4	0.00173	0.0061655	0.150964	763	4	-0.9825	0.99827	0.99826	1	18220	0	-0.9825
SETD1B	4	0.0017305	0.0061661	0.150964	764	4	-1.1303	0.99827	0.99826	1	18219	0	-1.1303
NPLOC4	4	0.001734	0.0061761	0.151013	765	4	-1.2483	0.99365	0.99366	1	17976	0	-1.2483
KIF20A	4	0.001737	0.0061851	0.151035	766	4	-0.86301	0.99826	0.99826	1	18217	0	-0.86301
QRSL1	4	0.0017466	0.006221	0.151714	767	3	-1.3697	0.88531	0.88533	1	15559	0	-1.3697
CCDC130	4	0.0017532	0.0062432	0.151907	768	3	-1.5484	0.46431	0.59702	1	10617	1	-1.5484
SNAPC2	4	0.0017542	0.0062458	0.151907	769	4	-0.64886	0.99825	0.99824	1	18216	0	-0.64886
YRDC	4	0.0017559	0.0062532	0.151907	770	2	-1.5713	0.81332	0.81354	1	14305	1	-1.5713
NCAPD2	4	0.0017785	0.0063377	0.153561	771	4	-0.84685	0.99822	0.99822	1	18215	0	-0.84685
CYTH4	4	0.0017851	0.0063593	0.153842	772	4	-0.9447	0.99821	0.9982	1	18214	0	-0.9447
SNRNP70	4	0.0017888	0.0063656	0.153842	773	2	-1.511	0.77219	0.77676	1	13684	1	-1.511
HSCB	4	0.0017967	0.0063878	0.154179	774	4	-1.5236	0.99617	0.99617	1	18081	0	-1.5236
FAM50A	4	0.0017998	0.0063984	0.154235	775	4	-1.1509	0.9982	0.99819	1	18213	0	-1.1509
ANKLE2	4	0.0018122	0.0064311	0.154825	776	4	-1.0041	0.99819	0.99818	1	18211	0	-1.0041
RPL34	2	0.0018243	0.0035707	0.103822	777	2	-3.4198	0.99818	0.99815	1	18210	0	-3.4198
RICTOR	4	0.0018276	0.0064929	0.156112	778	4	-1.0793	0.99817	0.99816	1	18209	0	-1.0793
CXXC1	4	0.0018309	0.0065045	0.156121	779	4	-1.492	0.99589	0.99586	1	18070	0	-1.492
TXNRD1	4	0.0018331	0.0065135	0.156121	780	4	-1.4872	0.99528	0.99528	1	18041	0	-1.4872
PTP4A1	4	0.0018348	0.0065182	0.156121	781	4	-1.1873	0.99817	0.99816	1	18208	0	-1.1873
MRPS34	4	0.001844	0.0065594	0.156907	782	4	-0.75949	0.99816	0.99815	1	18207	0	-0.75949
SYVN1	4	0.0018517	0.006589	0.157413	783	4	-0.5462	0.99815	0.99814	1	18206	0	-0.5462
ATP6V1D	4	0.0018576	0.0066095	0.157704	784	4	-1.2281	0.99814	0.99813	1	18204	0	-1.2281
DAP3	4	0.0018646	0.0066317	0.158021	785	3	-1.1202	0.98	0.9801	1	17525	0	-1.1202
RPS3	4	0.0018667	0.0066423	0.158021	786	3	-1.4381	0.8256	0.8256	1	14502	0	-1.4381
TMX2	4	0.0018683	0.0066481	0.158021	787	3	-1.2081	0.9787	0.97887	1	17487	0	-1.2081
INO80B	4	0.0019197	0.0068329	0.162207	788	3	-1.7146	0.97321	0.97338	1	17355	0	-1.7146
UBALD1	4	0.00197	0.0070066	0.165851	789	3	-1.1947	0.9038	0.90387	1	15920	0	-1.1947
HNRNPK	4	0.0019719	0.0070129	0.165851	790	3	-1.1298	0.93106	0.93119	1	16463	0	-1.1298
TSR1	4	0.0019966	0.0071048	0.167516	791	4	-1.0757	0.998	0.998	1	18202	0	-1.0757
RPAP2	4	0.0019987	0.0071111	0.167516	792	4	-0.81714	0.998	0.99799	1	18201	0	-0.81714
CENPA	4	0.0020004	0.007119	0.167516	793	4	-1.2869	0.99373	0.99375	1	17979	0	-1.2869
HIST1H3I	4	0.0020063	0.0071364	0.167715	794	3	-1.001	0.76632	0.77192	1	13596	1	-1.001
MRPS35	4	0.0020162	0.0071803	0.168534	795	4	-0.73318	0.99798	0.99798	1	18200	0	-0.73318
NAPA	4	0.0020214	0.0071945	0.168657	796	2	-1.3378	0.88216	0.8822	1	15501	0	-1.3378
TTC1	4	0.002038	0.00726	0.169979	797	4	-1.1852	0.99796	0.99796	1	18199	0	-1.1852
PSMD4	4	0.0020566	0.0073281	0.171258	798	3	-1.8214	0.98794	0.98797	1	17764	0	-1.8214
HAPLN2	4	0.002058	0.0073328	0.171258	799	4	-0.85805	0.99794	0.99794	1	18198	0	-0.85805
HIST1H2AB	4	0.0020731	0.0073872	0.172313	800	3	-1.367	0.98414	0.98414	1	17650	0	-1.367
LIMS2	4	0.0020832	0.0074184	0.172825	801	3	-1.0132	0.68244	0.71155	1	12559	1	-1.0132
TONSL	4	0.0020863	0.0074337	0.172966	802	4	-0.93803	0.99677	0.9968	1	18122	0	-0.93803
SLC33A1	4	0.0021086	0.0075181	0.174715	803	3	-0.95938	0.96914	0.9692	1	17265	0	-0.95938
DPAGT1	4	0.002118	0.0075524	0.175295	804	4	-1.1535	0.99788	0.99787	1	18195	0	-1.1535
SAP130	4	0.0021199	0.007563	0.175323	805	4	-1.4141	0.99234	0.99235	1	17927	0	-1.4141
GPN3	4	0.0021309	0.0076026	0.175929	806	3	-1.2459	0.96297	0.963	1	17116	0	-1.2459
RTCB	4	0.0021342	0.0076079	0.175929	807	4	-0.87698	0.99787	0.99786	1	18194	0	-0.87698
ZNF407	4	0.002139	0.0076301	0.176224	808	4	-0.70541	0.99786	0.99786	1	18193	0	-0.70541
KIAA0391	4	0.0021444	0.0076549	0.176545	809	4	-0.81765	0.99786	0.99785	1	18191	0	-0.81765
RPA1	4	0.002155	0.0076908	0.176973	810	3	-1.1157	0.98488	0.98489	1	17668	0	-1.1157
DDX46	4	0.002161	0.0077135	0.177277	811	3	-1.5312	0.98573	0.98572	1	17694	0	-1.5312
PCBP2	4	0.0021631	0.0077235	0.177291	812	4	-1.4561	0.99668	0.99671	1	18115	0	-1.4561
CACHD1	4	0.002175	0.007761	0.177933	813	4	-0.75458	0.99783	0.99783	1	18189	0	-0.75458
VMP1	4	0.0021787	0.0077747	0.17803	814	3	-1.3613	0.85375	0.85369	1	15000	0	-1.3613
METTL3	4	0.002186	0.0078037	0.178477	815	3	-1.4179	0.98209	0.98214	1	17593	0	-1.4179
RPL27	4	0.0021913	0.0078238	0.178718	816	3	-1.2126	0.98112	0.98117	1	17566	0	-1.2126
SMARCB1	4	0.0021975	0.0078444	0.178971	817	4	-0.78381	0.9978	0.9978	1	18187	0	-0.78381
GPS1	4	0.0022035	0.0078629	0.179174	818	3	-1.4251	0.96366	0.96372	1	17134	0	-1.4251
GINS1	4	0.0022279	0.0079574	0.181032	819	2	-1.0058	0.97125	0.97137	1	17313	0	-1.0058
NOP56	4	0.0022291	0.0079637	0.181032	820	3	-2.1285	0.24623	0.3866	0.995756	7222	1	-2.1285
MT1B	3	0.0022491	0.0063377	0.153561	821	3	-0.63644	0.99775	0.9978	1	18185	0	-0.63644
MAP3K11	4	0.0022544	0.0080572	0.182833	822	4	-0.87183	0.99775	0.99775	1	18183	0	-0.87183
OPA1	4	0.0022572	0.0080624	0.182833	823	4	-1.2379	0.99774	0.99775	1	18182	0	-1.2379
PRIM1	4	0.0022648	0.0080883	0.183198	824	3	-1.3538	0.90573	0.90578	1	15953	0	-1.3538
MRPL9	4	0.0022696	0.0081031	0.183312	825	4	-0.99815	0.99773	0.99774	1	18181	0	-0.99815
EIF6	4	0.0022781	0.0081305	0.18349	826	3	-1.3474	0.9718	0.97194	1	17327	0	-1.3474
NDUFB10	4	0.0022781	0.0081305	0.18349	827	4	-0.95665	0.99772	0.99773	1	18180	0	-0.95665
MPG	4	0.0022883	0.0081672	0.184024	828	4	-0.86904	0.99771	0.99771	1	18179	0	-0.86904
EXOSC3	4	0.00229	0.0081738	0.184024	829	4	-0.98425	0.99771	0.99771	1	18178	0	-0.98425
TMED10	4	0.0022958	0.0081928	0.184231	830	2	-0.72749	0.16372	0.30115	0.955843	5832	2	-0.72749
MAT2A	4	0.0023051	0.0082309	0.184864	831	3	-1.6319	0.98042	0.98052	1	17539	0	-1.6319
PEBP4	4	0.0023141	0.0082599	0.185294	832	4	-0.90511	0.99769	0.99769	1	18176	0	-0.90511
UCHL1	4	0.0023417	0.0083533	0.186912	833	4	-0.47361	0.99766	0.99765	1	18175	0	-0.47361
RIOK2	4	0.0023426	0.008356	0.186912	834	3	-1.3771	0.95141	0.95149	1	16852	0	-1.3771
LRRC66	4	0.0023464	0.0083692	0.186912	835	4	-0.64608	0.99765	0.99765	1	18174	0	-0.64608
DCTN1	4	0.0023469	0.0083755	0.186912	836	4	-1.3906	0.99765	0.99765	1	18173	0	-1.3906
C18orf21	4	0.0023498	0.0083818	0.186912	837	4	-0.95568	0.99765	0.99764	1	18172	0	-0.95568
CTNNBL1	4	0.0023693	0.0084436	0.188066	838	4	-1.0491	0.98956	0.98954	1	17825	0	-1.0491
TM9SF1	4	0.0023792	0.0084779	0.188593	839	3	-1.4059	0.71977	0.7367	1	13020	1	-1.4059
RPS14	4	0.0023825	0.0084906	0.188593	840	4	-0.90699	0.99762	0.99761	1	18171	0	-0.90699
MRPL34	4	0.0023843	0.0084975	0.188593	841	4	-0.94992	0.99762	0.9976	1	18170	0	-0.94992
VPS13A	4	0.0023984	0.0085434	0.189151	842	4	-1.0002	0.9976	0.99759	1	18169	0	-1.0002
DLST	4	0.002399	0.0085439	0.189151	843	4	-0.68898	0.9976	0.99759	1	18168	0	-0.68898
RCC1L	4	0.0024043	0.0085561	0.189151	844	4	-0.78132	0.9976	0.99758	1	18167	0	-0.78132
CHAF1B	4	0.0024058	0.0085629	0.189151	845	3	-1.5228	0.94187	0.94194	1	16665	0	-1.5228
SNRNP48	4	0.0024158	0.0085988	0.18972	846	3	-1.0437	0.98752	0.98752	1	17750	0	-1.0437
AMD1	4	0.0024292	0.0086511	0.190649	847	3	-1.154	0.90891	0.90893	1	16026	0	-1.154
GARS	4	0.0024795	0.0088137	0.194005	848	2	-1.0172	0.94908	0.94914	1	16805	0	-1.0172
TXN	3	0.002489	0.0069876	0.165669	849	3	-1.2039	0.99751	0.99753	1	18164	0	-1.2039
RACK1	4	0.0025054	0.0089034	0.195751	850	3	-1.7152	0.56839	0.64591	1	11445	1	-1.7152
COG3	4	0.00251	0.0089211	0.195802	851	4	-0.84814	0.99749	0.99748	1	18163	0	-0.84814
KRTCAP2	4	0.0025117	0.0089267	0.195802	852	3	-1.2155	0.93076	0.93088	1	16453	0	-1.2155
PIK3IP1	4	0.002548	0.0090418	0.198095	853	4	-0.52153	0.99745	0.99744	1	18160	0	-0.52153
SKIV2L2	4	0.0025674	0.0091067	0.199285	854	3	-1.2754	0.98425	0.98425	1	17651	0	-1.2754
SRBD1	4	0.0026007	0.0092229	0.201357	855	3	-1.2773	0.97704	0.97725	1	17443	0	-1.2773
LAS1L	4	0.0026078	0.0092524	0.201767	856	4	-1.1541	0.99739	0.99738	1	18157	0	-1.1541
MRPS26	4	0.0026112	0.0092635	0.201774	857	3	-1.0307	0.87124	0.87122	1	15320	0	-1.0307
UBA2	4	0.0026382	0.0093485	0.20339	858	3	-1.2024	0.64833	0.69043	1	12193	1	-1.2024
ZW10	4	0.0026412	0.0093628	0.203464	859	4	-0.75244	0.99736	0.99735	1	18156	0	-0.75244
TTC17	4	0.0026469	0.0093749	0.203492	860	4	-0.63449	0.99735	0.99735	1	18155	0	-0.63449
RRP12	4	0.0026545	0.009395	0.203691	861	4	-1.2255	0.99735	0.99734	1	18154	0	-1.2255
ARHGAP19	4	0.0026698	0.0094409	0.204139	862	4	-0.67831	0.99733	0.99732	1	18153	0	-0.67831
SNUPN	4	0.0026705	0.0094425	0.204139	863	4	-0.99793	0.99733	0.99732	1	18152	0	-0.99793
KANSL1	4	0.0026717	0.0094483	0.204139	864	4	-0.7213	0.99733	0.99732	1	18151	0	-0.7213
NFS1	4	0.0026801	0.0094757	0.204463	865	3	-1.474	0.98761	0.98761	1	17754	0	-1.474
AASDHPPT	4	0.0026857	0.0094926	0.204463	866	4	-1.2195	0.99445	0.99447	1	18007	0	-1.2195
CDAN1	4	0.0026902	0.0095069	0.204463	867	3	-1.3044	0.53492	0.62928	1	11170	1	-1.3044
PSMC6	4	0.0026902	0.0095069	0.204463	868	3	-0.71731	0.40106	0.54655	1	9831	1	-0.71731
SHMT2	4	0.0027137	0.009595	0.206123	869	2	-1.0784	0.45526	0.59309	1	10561	1	-1.0784
NUP58	4	0.0027205	0.0096204	0.206431	870	3	-1.7879	0.9785	0.97867	1	17478	0	-1.7879
XRN2	4	0.002734	0.0096647	0.206946	871	3	-1.1171	0.66719	0.70186	1	12403	1	-1.1171
SUPT4H1	4	0.0027362	0.0096727	0.206946	872	4	-0.96725	0.99726	0.99726	1	18149	0	-0.96725
GNG5	3	0.0027382	0.0076628	0.176545	873	3	-1.2285	0.99726	0.9973	1	18148	0	-1.2285
CPSF2	4	0.0027421	0.0096922	0.206946	874	4	-1.045	0.99726	0.99725	1	18147	0	-1.045
NHLRC4	4	0.0027428	0.0096948	0.206946	875	4	-0.61366	0.99726	0.99725	1	18146	0	-0.61366
UTP20	4	0.0027539	0.0097397	0.207444	876	4	-0.53625	0.99725	0.99724	1	18145	0	-0.53625
SMNDC1	4	0.0027579	0.0097508	0.207444	877	4	-1.4942	0.99147	0.99149	1	17888	0	-1.4942
SHQ1	4	0.0027604	0.0097561	0.207444	878	3	-1.0578	0.96786	0.96794	1	17229	0	-1.0578
MAD2L2	4	0.002764	0.0097677	0.207455	879	4	-1.4183	0.99582	0.99579	1	18063	0	-1.4183
PITRM1	4	0.0027933	0.0098775	0.20955	880	4	-1.0669	0.9945	0.99452	1	18011	0	-1.0669
POP7	4	0.0027986	0.0098949	0.209683	881	2	-1.0738	0.30242	0.44451	1	8125	2	-1.0738
GEMIN5	4	0.0028226	0.0099789	0.211082	882	3	-1.6997	0.73764	0.74954	1	13244	1	-1.6997
ZNF830	4	0.0028258	0.0099921	0.211082	883	4	-0.92488	0.99717	0.99718	1	18143	0	-0.92488
MRPL36	4	0.0028272	0.0099947	0.211082	884	4	-0.77196	0.99717	0.99718	1	18142	0	-0.77196
UQCRQ	4	0.0028325	0.010015	0.211153	885	4	-0.72915	0.99717	0.99717	1	18141	0	-0.72915
CHADL	4	0.0028352	0.010021	0.211153	886	4	-0.517	0.99716	0.99717	1	18140	0	-0.517
ATG9A	4	0.0028524	0.01008	0.21216	887	4	-1.3893	0.99529	0.99528	1	18042	0	-1.3893
RPP21	4	0.0028624	0.010121	0.212705	888	4	-1.2038	0.99374	0.99377	1	17980	0	-1.2038
TSEN34	4	0.0028649	0.010128	0.212705	889	3	-1.0878	0.97687	0.97707	1	17437	0	-1.0878
SPSB4	4	0.0028762	0.010163	0.213198	890	4	-0.46281	0.99712	0.99713	1	18139	0	-0.46281
CAMLG	4	0.0028884	0.010207	0.213878	891	4	-0.78861	0.99711	0.99712	1	18138	0	-0.78861
GLE1	4	0.0028961	0.010229	0.214103	892	4	-1.2752	0.99194	0.99195	1	17909	0	-1.2752
NDUFV1	4	0.0029313	0.010359	0.21658	893	4	-0.83252	0.99707	0.99708	1	18137	0	-0.83252
MED6	4	0.0029371	0.010386	0.216901	894	3	-1.2529	0.63177	0.68066	1	12016	1	-1.2529
ENDOD1	4	0.0029443	0.010411	0.217134	895	4	-0.89309	0.99706	0.99707	1	18136	0	-0.89309
PICK1	4	0.0029476	0.01042	0.217134	896	3	-1.0874	0.96939	0.96944	1	17270	0	-1.0874
C11orf98	4	0.002963	0.010469	0.217783	897	3	-0.91778	0.98912	0.98913	1	17810	0	-0.91778
DKC1	4	0.0029652	0.010475	0.217783	898	3	-1.68	0.84033	0.84025	1	14747	0	-1.68
NPHP1	4	0.0029761	0.010513	0.21809	899	4	-0.84645	0.99702	0.99705	1	18135	0	-0.84645
SNRPC	4	0.002981	0.010528	0.218177	900	4	-0.71986	0.99702	0.99704	1	18134	0	-0.71986
POP5	4	0.002997	0.010589	0.218973	901	3	-1.0283	0.72098	0.73757	1	13037	1	-1.0283
PIGM	4	0.0029976	0.01059	0.218973	902	4	-0.74584	0.997	0.99703	1	18133	0	-0.74584
GABPA	4	0.0030516	0.010764	0.222331	903	4	-1.2072	0.99071	0.9907	1	17865	0	-1.2072
DHPS	4	0.0030645	0.010801	0.222849	904	3	-1.099	0.80814	0.80853	1	14211	1	-1.099
TFPT	4	0.0030729	0.010825	0.223093	905	4	-0.6102	0.99693	0.99695	1	18131	0	-0.6102
COG8	4	0.0030843	0.010874	0.223848	906	4	-0.88816	0.99692	0.99694	1	18130	0	-0.88816
PPP1R10	4	0.0031079	0.010957	0.225318	907	4	-0.91548	0.99689	0.99692	1	18129	0	-0.91548
THEGL	4	0.0031129	0.010972	0.225386	908	4	-0.75599	0.99689	0.99691	1	18128	0	-0.75599
RPE	4	0.003122	0.011007	0.225588	909	3	-1.5419	0.75065	0.75953	1	13402	1	-1.5419
BRCA1	4	0.0031235	0.011016	0.225588	910	4	-1.2203	0.99679	0.99682	1	18123	0	-1.2203
SEC16A	4	0.0031244	0.011018	0.225588	911	3	-0.95613	0.49877	0.61249	1	10868	1	-0.95613
HIGD2A	4	0.0031294	0.011035	0.225688	912	4	-0.68691	0.99687	0.9969	1	18127	0	-0.68691
WDHD1	4	0.0031459	0.011098	0.226725	913	3	-1.283	0.98346	0.98346	1	17627	0	-1.283
USP7	4	0.0031554	0.011137	0.227136	914	4	-0.74431	0.99684	0.99688	1	18126	0	-0.74431
RHBDF1	4	0.0031568	0.011142	0.227136	915	4	-0.7941	0.99684	0.99687	1	18125	0	-0.7941
TIMM29	4	0.0031691	0.011188	0.227825	916	3	-1.1996	0.65039	0.69169	1	12223	1	-1.1996
ZC3H11A	4	0.0031772	0.011218	0.228157	917	4	-0.86774	0.99682	0.99685	1	18124	0	-0.86774
WDR55	4	0.0031804	0.011229	0.228157	918	3	-1.2292	0.95181	0.95189	1	16862	0	-1.2292
ZNF511	4	0.0031924	0.011274	0.228809	919	3	-1.1659	0.16031	0.2976	0.954042	5771	1	-1.1659
FNDC7	4	0.0031964	0.011286	0.228809	920	3	-0.78399	0.83807	0.83801	1	14711	0	-0.78399
CSAD	4	0.0032044	0.011308	0.229011	921	4	-0.91747	0.9962	0.9962	1	18085	0	-0.91747
VPS9D1	4	0.0032314	0.011394	0.230289	922	4	-0.61525	0.99677	0.9968	1	18121	0	-0.61525
INTS14	4	0.0032321	0.011395	0.230289	923	4	-0.73981	0.99677	0.9968	1	18120	0	-0.73981
SRRT	4	0.0032506	0.011469	0.231533	924	4	-1.7411	0.99675	0.99677	1	18119	0	-1.7411
ARFRP1	4	0.0032729	0.011549	0.232902	925	4	-1.0027	0.99673	0.99675	1	18117	0	-1.0027
RPL38	3	0.0033116	0.009217	0.201357	926	3	-0.93373	0.99669	0.99674	1	18116	0	-0.93373
ERCC3	4	0.0033181	0.011699	0.235672	927	3	-1.8396	0.94635	0.9464	1	16755	0	-1.8396
MRPS14	4	0.0033359	0.011755	0.236398	928	3	-0.9184	0.95902	0.95909	1	17026	0	-0.9184
PRPF4	4	0.0033384	0.011761	0.236398	929	3	-1.3715	0.89994	0.89993	1	15842	0	-1.3715
ACTA2	4	0.0033566	0.011822	0.237385	930	3	-1.0375	0.76847	0.77373	1	13628	1	-1.0375
PROB1	4	0.0033654	0.01185	0.237534	931	4	-0.8149	0.99663	0.99667	1	18114	0	-0.8149
HIST2H2BE	4	0.0033669	0.011855	0.237534	932	4	-0.98179	0.99663	0.99666	1	18113	0	-0.98179
MYOZ1	4	0.0033806	0.011897	0.238115	933	4	-0.98267	0.99662	0.99665	1	18112	0	-0.98267
PSMD7	4	0.0033883	0.011921	0.238347	934	4	-0.92721	0.99661	0.99664	1	18111	0	-0.92721
BSDC1	4	0.0033926	0.011937	0.238366	935	3	-0.9068	0.47011	0.59954	1	10651	1	-0.9068
ADAT1	4	0.0033958	0.011948	0.238366	936	1	0.18588	0.35177	0.49561	1	8998	2	0.18588
MAK16	4	0.0034093	0.011993	0.239018	937	3	-1.466	0.98096	0.98104	1	17559	0	-1.466
GNL2	4	0.0034209	0.012036	0.239616	938	3	-1.046	0.89485	0.89484	1	15742	0	-1.046
ARHGDIG	4	0.0034289	0.012064	0.239918	939	4	-0.96287	0.99657	0.9966	1	18108	0	-0.96287
ITPK1	4	0.003449	0.01213	0.240985	940	4	-1.1451	0.99655	0.99658	1	18107	0	-1.1451
PSMD3	4	0.0034537	0.012143	0.240992	941	4	-0.76615	0.99655	0.99658	1	18106	0	-0.76615
ZNHIT6	4	0.0034597	0.012167	0.241208	942	3	-1.5518	0.96917	0.96922	1	17266	0	-1.5518
FASN	4	0.0034731	0.012221	0.241823	943	4	-0.60001	0.99653	0.99655	1	18105	0	-0.60001
WDR33	4	0.0034739	0.012224	0.241823	944	3	-1.3106	0.8637	0.86365	1	15187	0	-1.3106
EFHD2	4	0.0034766	0.012237	0.241823	945	3	-0.87597	0.78255	0.78554	1	13819	1	-0.87597
TRIAP1	4	0.0034836	0.012253	0.241892	946	4	-1.0732	0.99077	0.99076	1	17868	0	-1.0732
EIF1AX	3	0.0034943	0.0096996	0.206946	947	3	-1.0293	0.99651	0.99655	1	18104	0	-1.0293
PSMD13	4	0.0035081	0.012338	0.243303	948	4	-1.4513	0.99605	0.99603	1	18075	0	-1.4513
NIF3L1	4	0.0035234	0.012387	0.243966	949	2	-0.57077	0.30132	0.4434	1	8107	2	-0.57077
2021-09-05	4	0.0035272	0.012397	0.243966	950	3	-0.90062	0.98713	0.98711	1	17737	0	-0.90062
BVES	4	0.0035358	0.012424	0.244119	951	4	-0.78969	0.99646	0.99648	1	18102	0	-0.78969
RANBP3	4	0.0035374	0.012431	0.244119	952	4	-0.56599	0.99646	0.99648	1	18101	0	-0.56599
MAB21L3	4	0.0035746	0.012546	0.246121	953	4	-0.60037	0.99643	0.99644	1	18099	0	-0.60037
TGM7	4	0.0036073	0.012657	0.248027	954	4	-0.70841	0.99639	0.99641	1	18098	0	-0.70841
MICALCL	4	0.0036169	0.01269	0.248263	955	4	-0.87161	0.99638	0.99639	1	18097	0	-0.87161
UTP4	4	0.0036185	0.012695	0.248263	956	4	-0.8803	0.99638	0.99639	1	18096	0	-0.8803
ATP5A1	4	0.0036274	0.012728	0.248654	957	4	-1.0358	0.99637	0.99638	1	18095	0	-1.0358
RREB1	4	0.0036378	0.012764	0.249096	958	4	-0.57975	0.99636	0.99638	1	18094	0	-0.57975
CHD1	4	0.0036471	0.0128	0.249527	959	4	-0.8909	0.99385	0.99388	1	17982	0	-0.8909
TBCA	2	0.0036473	0.0070995	0.167516	960	2	-2.4987	0.99635	0.99632	1	18093	0	-2.4987
SHROOM3	4	0.0036548	0.012825	0.249756	961	4	-0.83391	0.99635	0.99635	1	18092	0	-0.83391
MEF2B	4	0.0036718	0.012883	0.250632	962	4	-0.64603	0.99633	0.99634	1	18091	0	-0.64603
SLC2A11	4	0.0036777	0.012901	0.250721	963	3	-1.0703	0.50862	0.61693	1	10942	1	-1.0703
SRCAP	4	0.003685	0.012918	0.250789	964	3	-1.2033	0.66733	0.70195	1	12404	1	-1.2033
ELP4	4	0.0037371	0.013101	0.254073	965	4	-0.84002	0.99626	0.99627	1	18089	0	-0.84002
MRPL30	4	0.0037544	0.013162	0.254899	966	4	-0.72389	0.99625	0.99626	1	18088	0	-0.72389
DDX18	4	0.0037588	0.013176	0.254899	967	3	-1.4226	0.94061	0.94067	1	16644	0	-1.4226
TBCE	4	0.0037619	0.013184	0.254899	968	4	-0.96622	0.99624	0.99624	1	18087	0	-0.96622
SRRM2	4	0.0037776	0.013244	0.255618	969	4	-0.8124	0.99622	0.99622	1	18086	0	-0.8124
WDR12	4	0.0037802	0.013248	0.255618	970	4	-1.2725	0.99573	0.9957	1	18059	0	-1.2725
SAE1	4	0.0037961	0.013297	0.256291	971	3	-1.2108	0.9806	0.98069	1	17549	0	-1.2108
DPF2	4	0.0038142	0.013352	0.256964	972	4	-0.96662	0.99619	0.99619	1	18083	0	-0.96662
PTGIS	4	0.0038167	0.013359	0.256964	973	4	-0.72443	0.99618	0.99619	1	18082	0	-0.72443
RRP15	4	0.0038376	0.013439	0.258019	974	4	-0.60935	0.99616	0.99616	1	18080	0	-0.60935
SFSWAP	4	0.0038385	0.013442	0.258019	975	4	-0.81841	0.99616	0.99616	1	18079	0	-0.81841
NDUFAB1	4	0.0038578	0.013501	0.258899	976	4	-0.80527	0.99614	0.99614	1	18078	0	-0.80527
CABP5	4	0.0038696	0.013537	0.259322	977	3	-0.8152	0.72598	0.74117	1	13094	1	-0.8152
ACTR10	4	0.0038918	0.013611	0.260462	978	3	-1.1608	0.97484	0.975	1	17383	0	-1.1608
C12orf45	4	0.0039018	0.013641	0.260698	979	4	-0.47874	0.9961	0.99609	1	18077	0	-0.47874
UNC5CL	4	0.0039052	0.013651	0.260698	980	4	-0.61196	0.99609	0.99608	1	18076	0	-0.61196
PES1	4	0.0039243	0.013709	0.26155	981	3	-1.1852	0.40482	0.55037	1	9902	1	-1.1852
EME2	4	0.003938	0.013761	0.262271	982	4	-1.0401	0.9936	0.99362	1	17973	0	-1.0401
TGFBRAP1	4	0.0039534	0.013804	0.262829	983	3	-1.084	0.75046	0.75937	1	13401	1	-1.084
KMT2D	4	0.0039995	0.013985	0.265996	984	3	-0.98439	0.97187	0.97202	1	17329	0	-0.98439
RFC4	4	0.0040213	0.014069	0.267061	985	2	-0.96468	0.58876	0.65665	1	11618	1	-0.96468
TNS2	4	0.0040325	0.0141	0.267372	986	4	-0.75788	0.99597	0.99594	1	18074	0	-0.75788
STX18	4	0.0040473	0.014152	0.268082	987	4	-0.66453	0.99595	0.99593	1	18073	0	-0.66453
MRPL38	4	0.0040823	0.014268	0.269737	988	4	-0.5835	0.99592	0.99589	1	18072	0	-0.5835
TSG101	4	0.0040885	0.014294	0.269954	989	4	-1.0316	0.99591	0.99588	1	18071	0	-1.0316
SIN3A	4	0.004101	0.014335	0.270456	990	3	-0.68933	0.62122	0.67461	1	11913	1	-0.68933
MASTL	4	0.0041055	0.014349	0.270456	991	3	-0.79453	0.73724	0.74923	1	13237	1	-0.79453
RPF2	4	0.0041133	0.014372	0.270612	992	3	-1.0098	0.96589	0.96596	1	17181	0	-1.0098
ELP6	4	0.0041238	0.014413	0.271115	993	4	-0.76072	0.99588	0.99585	1	18069	0	-0.76072
SYNGAP1	4	0.0041291	0.014432	0.271191	994	4	-0.47574	0.99587	0.99584	1	18068	0	-0.47574
MLST8	4	0.0041344	0.014455	0.271356	995	4	-0.9183	0.99587	0.99584	1	18066	0	-0.9183
GFER	4	0.0041401	0.014471	0.271381	996	3	-1.1964	0.98444	0.98444	1	17656	0	-1.1964
APBB2	4	0.0041559	0.014511	0.271685	997	3	-0.95887	0.98663	0.98659	1	17722	0	-0.95887
POLD3	4	0.0041584	0.014518	0.271685	998	4	-1.2604	0.99584	0.99582	1	18065	0	-1.2604
CLCC1	4	0.0041611	0.01453	0.271685	999	4	-0.52419	0.99584	0.99581	1	18064	0	-0.52419
NR4A2	4	0.0041972	0.014656	0.273761	1000	3	-0.79997	0.98062	0.98071	1	17553	0	-0.79997
TMEM186	4	0.0042076	0.014689	0.2741	1001	4	-0.5051	0.99579	0.99577	1	18062	0	-0.5051
ZSCAN32	4	0.0042388	0.014791	0.275727	1002	3	-0.94267	0.48618	0.60675	1	10768	1	-0.94267
SRM	4	0.0042564	0.014854	0.276633	1003	4	-0.71691	0.99574	0.99572	1	18060	0	-0.71691
NT5DC3	4	0.0043065	0.015014	0.279335	1004	4	-0.63787	0.99569	0.99567	1	18056	0	-0.63787
SPOUT1	4	0.0043553	0.015179	0.282129	1005	3	-1.0105	0.82524	0.82524	1	14494	0	-1.0105
DDX27	4	0.0043835	0.015264	0.283418	1006	3	-1.3735	0.96881	0.9689	1	17258	0	-1.3735
FANCM	4	0.0044044	0.015327	0.284323	1007	3	-1.0998	0.98107	0.98112	1	17563	0	-1.0998
VPS33A	4	0.0044143	0.015352	0.284502	1008	3	-0.87566	0.89677	0.89673	1	15780	0	-0.87566
CAPN11	4	0.0044374	0.015428	0.285628	1009	3	-1.1021	0.59149	0.65816	1	11638	1	-1.1021
ROPN1L	4	0.0044871	0.015603	0.288579	1010	4	-0.89323	0.99327	0.99328	1	17954	0	-0.89323
DHRS11	4	0.0045112	0.015687	0.289855	1011	4	-0.63396	0.99549	0.99547	1	18054	0	-0.63396
MYPN	4	0.004515	0.015703	0.289862	1012	4	-0.95998	0.99548	0.99547	1	18053	0	-0.95998
DNAJC9	4	0.0045492	0.015821	0.291738	1013	4	-0.48065	0.99545	0.99544	1	18052	0	-0.48065
C19orf38	4	0.0045588	0.01585	0.291997	1014	4	-0.88553	0.99544	0.99543	1	18051	0	-0.88553
OSTM1	4	0.0045836	0.015938	0.29321	1015	4	-0.48315	0.99542	0.9954	1	18050	0	-0.48315
CPNE5	4	0.004586	0.015947	0.29321	1016	3	-1.0846	0.95693	0.95699	1	16981	0	-1.0846
EPRS	4	0.0046063	0.01601	0.294067	1017	3	-0.89853	0.95501	0.95505	1	16930	0	-0.89853
ELL	4	0.0046124	0.016034	0.294214	1018	4	-0.91892	0.99539	0.99538	1	18049	0	-0.91892
AFG3L2	4	0.0046201	0.016054	0.294214	1019	4	-0.8448	0.99538	0.99537	1	18048	0	-0.8448
RPS6	4	0.0046266	0.016076	0.294214	1020	3	-1.2018	0.6834	0.7122	1	12570	1	-1.2018
CHUK	4	0.0046279	0.01608	0.294214	1021	4	-0.76256	0.99537	0.99536	1	18047	0	-0.76256
LIN7C	4	0.0046569	0.016172	0.295597	1022	4	-0.73378	0.99534	0.99533	1	18046	0	-0.73378
XPO5	4	0.0046666	0.016204	0.295897	1023	4	-0.53696	0.99533	0.99532	1	18045	0	-0.53696
CTU2	4	0.004689	0.016281	0.297015	1024	4	-0.6901	0.99531	0.9953	1	18044	0	-0.6901
CTDSPL	4	0.0046958	0.016306	0.297179	1025	4	-0.75941	0.9953	0.9953	1	18043	0	-0.75941
PAM16	4	0.004721	0.0164	0.298571	1026	3	-1.4318	0.97939	0.97953	1	17505	0	-1.4318
TOX4	4	0.0047242	0.016414	0.298571	1027	4	-1.0326	0.99528	0.99527	1	18040	0	-1.0326
AARS2	4	0.004735	0.016451	0.29894	1028	4	-1.0828	0.99527	0.99526	1	18039	0	-1.0828
CNPY3	4	0.0047428	0.016482	0.29894	1029	4	-0.73096	0.99526	0.99525	1	18038	0	-0.73096
FBXO42	4	0.0047429	0.016482	0.29894	1030	3	-1.097	0.98126	0.98131	1	17572	0	-1.097
SRRM1	4	0.0047566	0.016524	0.299271	1031	4	-0.95071	0.99524	0.99523	1	18036	0	-0.95071
ZNF382	4	0.0047596	0.016532	0.299271	1032	4	-0.57708	0.99524	0.99523	1	18035	0	-0.57708
S100A12	4	0.0047734	0.016597	0.300096	1033	4	-0.54024	0.99523	0.99522	1	18034	0	-0.54024
SLF1	4	0.0047773	0.01661	0.300096	1034	4	-0.9652	0.99522	0.99521	1	18033	0	-0.9652
C19orf53	4	0.0047872	0.016643	0.300398	1035	4	-0.70524	0.99521	0.9952	1	18032	0	-0.70524
DummyGuide_1305	1	0.0047942	0.004709	0.125443	1036	1	-1.9383	0.99521	0.99527	1	18031	0	-1.9383
HYPK	4	0.0047966	0.016675	0.300658	1037	4	-0.9901	0.99438	0.9944	1	18003	0	-0.9901
CCNL1	4	0.0048006	0.016689	0.300658	1038	3	-1.5373	0.57903	0.65148	1	11535	1	-1.5373
TSR2	4	0.00488	0.016944	0.304959	1039	4	-0.87671	0.99512	0.99512	1	18029	0	-0.87671
SS18L2	4	0.0049032	0.017022	0.306062	1040	3	-1.0446	0.95145	0.95153	1	16854	0	-1.0446
MCAT	4	0.0049223	0.017089	0.306973	1041	4	-0.49031	0.99508	0.99508	1	18028	0	-0.49031
ATP5L	4	0.0049578	0.017199	0.308669	1042	4	-0.92586	0.99504	0.99504	1	18026	0	-0.92586
THAP1	4	0.0049685	0.017231	0.308942	1043	4	-1.0584	0.99277	0.99279	1	17940	0	-1.0584
SPRTN	4	0.0049777	0.017268	0.309116	1044	4	-0.82132	0.98982	0.98979	1	17840	0	-0.82132
PRKDC	4	0.004983	0.017284	0.309116	1045	4	-1.0468	0.99153	0.99154	1	17893	0	-1.0468
UBE3A	4	0.0049848	0.01729	0.309116	1046	3	-1.1914	0.97488	0.97504	1	17386	0	-1.1914
CMPK1	4	0.0049978	0.017326	0.309453	1047	3	-1.1342	0.96153	0.96155	1	17080	0	-1.1342
RPF1	4	0.0050432	0.017488	0.31206	1048	4	-1.1196	0.98954	0.98952	1	17824	0	-1.1196
BCL2L1	4	0.0050829	0.017612	0.313611	1049	4	-0.53182	0.99492	0.99492	1	18024	0	-0.53182
HSPB7	4	0.005086	0.017624	0.313611	1050	4	-0.65729	0.99491	0.99492	1	18023	0	-0.65729
LIN52	4	0.0050869	0.017628	0.313611	1051	3	-1.4017	0.95878	0.95884	1	17019	0	-1.4017
MB21D1	4	0.0050923	0.017648	0.313611	1052	4	-0.83172	0.99491	0.99491	1	18022	0	-0.83172
PATJ	4	0.0050954	0.017659	0.313611	1053	4	-0.54294	0.9949	0.9949	1	18021	0	-0.54294
NPIPB15	4	0.0051207	0.01774	0.314757	1054	2	-0.74514	0.65066	0.69186	1	12227	1	-0.74514
RPL35	3	0.005145	0.014222	0.26915	1055	2	-1.9286	0.9409	0.94103	1	16651	0	-1.9286
SLX4	4	0.0051632	0.017863	0.316257	1056	4	-0.73868	0.99484	0.99483	1	18020	0	-0.73868
CES2	4	0.0051642	0.017866	0.316257	1057	4	-0.57809	0.99484	0.99483	1	18019	0	-0.57809
YAE1D1	4	0.0051666	0.017875	0.316257	1058	3	-1.548	0.9013	0.90132	1	15870	0	-1.548
MAD2L1BP	4	0.0051726	0.017897	0.316351	1059	4	-0.50046	0.99483	0.99483	1	18018	0	-0.50046
LIN9	4	0.0051999	0.017998	0.317834	1060	4	-0.75522	0.9948	0.9948	1	18017	0	-0.75522
CRP	4	0.0052087	0.01803	0.318074	1061	3	-0.89019	0.98005	0.98016	1	17527	0	-0.89019
ZBTB17	4	0.0052142	0.018046	0.318074	1062	3	-1.0894	0.80654	0.80708	1	14177	1	-1.0894
SMARCD1	4	0.0052253	0.018079	0.318356	1063	4	-0.68936	0.99477	0.99478	1	18016	0	-0.68936
HIST2H2AC	4	0.0052473	0.018161	0.319502	1064	3	-1.0697	0.81906	0.81912	1	14406	1	-1.0697
TAF8	4	0.0052639	0.018215	0.319998	1065	3	-1.0446	0.95354	0.9536	1	16903	0	-1.0446
C11orf70	4	0.0052676	0.018223	0.319998	1066	3	-1.1114	0.9531	0.95319	1	16894	0	-1.1114
NAT10	4	0.0052775	0.018253	0.320226	1067	3	-1.0635	0.5819	0.65298	1	11558	1	-1.0635
AATF	4	0.0053194	0.018387	0.322268	1068	3	-0.97236	0.94048	0.94055	1	16639	0	-0.97236
RPS13	4	0.0053568	0.018507	0.324075	1069	2	-1.0101	0.77338	0.77773	1	13703	1	-1.0101
WNK1	4	0.0053697	0.018547	0.324257	1070	3	-0.94299	0.9435	0.94361	1	16697	0	-0.94299
ALDH18A1	4	0.0053734	0.018556	0.324257	1071	3	-0.82305	0.93944	0.93954	1	16616	0	-0.82305
WARS	4	0.0053772	0.01857	0.324257	1072	3	-1.0097	0.92532	0.92549	1	16347	0	-1.0097
SNX32	4	0.0053884	0.018601	0.324499	1073	4	-1.0656	0.99225	0.99227	1	17921	0	-1.0656
BRCA2	4	0.0053978	0.018632	0.32475	1074	3	-0.93991	0.77782	0.78142	1	13761	1	-0.93991
MBD3L3	2	0.0054228	0.010508	0.21809	1075	2	-1.3499	0.99458	0.99455	1	18014	0	-1.3499
RPL3L	4	0.0054562	0.018848	0.327996	1076	2	-0.14176	0.24725	0.38768	0.995825	7243	2	-0.14176
ZNF362	4	0.005458	0.018854	0.327996	1077	3	-1.1561	0.31319	0.45573	1	8329	1	-1.1561
CLASRP	4	0.0054716	0.018898	0.328462	1078	4	-0.54487	0.99453	0.99454	1	18013	0	-0.54487
PIGS	4	0.0054826	0.018928	0.328681	1079	4	-0.40523	0.99452	0.99453	1	18012	0	-0.40523
SNRNP27	4	0.0054977	0.018992	0.329494	1080	3	-1.0179	0.98193	0.98199	1	17587	0	-1.0179
RAD17	4	0.0055111	0.019033	0.329894	1081	4	-0.64612	0.99449	0.99451	1	18010	0	-0.64612
ZC3H18	4	0.0055166	0.019052	0.329919	1082	4	-0.73344	0.99448	0.9945	1	18009	0	-0.73344
PRDM1	4	0.0055265	0.019079	0.330089	1083	3	-0.91009	0.9864	0.98637	1	17715	0	-0.91009
RPAIN	4	0.0055398	0.019122	0.330524	1084	4	-0.6532	0.99446	0.99448	1	18008	0	-0.6532
C22orf31	4	0.0055605	0.019176	0.331141	1085	3	-0.98907	0.98648	0.98645	1	17716	0	-0.98907
IL3	4	0.0055788	0.019241	0.33157	1086	3	-0.96962	0.62386	0.67613	1	11943	1	-0.96962
DNM1L	4	0.0055863	0.019266	0.33157	1087	4	-0.67491	0.99441	0.99443	1	18006	0	-0.67491
SNIP1	4	0.0055884	0.019271	0.33157	1088	3	-0.82522	0.8337	0.83371	1	14641	0	-0.82522
CCDC151	4	0.0055886	0.019271	0.33157	1089	4	-0.92354	0.99441	0.99442	1	18005	0	-0.92354
WDR18	4	0.0055979	0.019301	0.331783	1090	4	-1.1284	0.99198	0.99199	1	17911	0	-1.1284
L1TD1	4	0.0056153	0.019367	0.332613	1091	4	-0.47265	0.99438	0.9944	1	18004	0	-0.47265
MAST4	4	0.005622	0.019389	0.33268	1092	4	-1.0007	0.99438	0.99439	1	18002	0	-1.0007
CEP85	4	0.00565	0.019478	0.333905	1093	4	-0.53326	0.99435	0.99437	1	18001	0	-0.53326
WNT8B	4	0.005665	0.019527	0.334432	1094	3	-1.1059	0.92397	0.92413	1	16319	0	-1.1059
GADD45GIP1	4	0.0056837	0.019589	0.335202	1095	3	-0.94129	0.94765	0.94773	1	16776	0	-0.94129
HAUS2	4	0.005705	0.019659	0.336079	1096	3	-0.98841	0.98786	0.98788	1	17760	0	-0.98841
SERPINB9	4	0.0057379	0.019774	0.337738	1097	4	-0.68237	0.99426	0.99429	1	18000	0	-0.68237
KCTD10	4	0.0057777	0.019887	0.339368	1098	4	-0.6807	0.99422	0.99426	1	17999	0	-0.6807
DRP2	4	0.0058007	0.019964	0.340374	1099	3	-0.68539	0.97172	0.97184	1	17322	0	-0.68539
SPDL1	4	0.0058302	0.020058	0.341364	1100	3	-1.2295	0.95315	0.95324	1	16896	0	-1.2295
CUL9	4	0.0058303	0.020059	0.341364	1101	4	-0.55028	0.99417	0.9942	1	17997	0	-0.55028
MYC	4	0.0058538	0.020132	0.342082	1102	3	-1.0315	0.0019299	0.0068709	0.581922	207	1	-1.0315
CHMP2A	4	0.0058556	0.020137	0.342082	1103	4	-0.59877	0.99414	0.99418	1	17996	0	-0.59877
PITPNB	4	0.0058716	0.020199	0.342812	1104	3	-1.1202	0.89801	0.89797	1	15804	0	-1.1202
PDPR	4	0.0058815	0.020234	0.343102	1105	3	-0.82414	0.94264	0.94272	1	16679	0	-0.82414
IMPDH2	4	0.0058974	0.020286	0.343668	1106	3	-0.88491	0.98217	0.9822	1	17597	0	-0.88491
SUPT5H	4	0.0059111	0.020338	0.343932	1107	4	-0.90668	0.99409	0.99412	1	17993	0	-0.90668
MRPS10	4	0.0059113	0.020338	0.343932	1108	3	-0.93418	0.29243	0.43428	1	7967	1	-0.93418
METTL16	4	0.0059272	0.020395	0.344577	1109	3	-1.2251	0.13819	0.27449	0.937145	5403	1	-1.2251
LCK	4	0.0059367	0.020434	0.344653	1110	4	-0.45476	0.99406	0.9941	1	17992	0	-0.45476
KDM4A	4	0.005939	0.020443	0.344653	1111	4	-0.77061	0.99406	0.9941	1	17991	0	-0.77061
LSM11	4	0.0059421	0.020454	0.344653	1112	3	-1.1001	0.91723	0.91731	1	16192	0	-1.1001
USE1	4	0.0059646	0.020521	0.345473	1113	4	-0.58584	0.99404	0.99408	1	17990	0	-0.58584
LRP4	4	0.0059857	0.020605	0.346575	1114	4	-1.047	0.99401	0.99406	1	17989	0	-1.047
ZBTB25	4	0.0059963	0.02064	0.34685	1115	2	-0.6243	0.11091	0.23422	0.916346	4684	1	-0.6243
RAD9A	4	0.0060273	0.020749	0.348365	1116	3	-0.79558	0.84593	0.84584	1	14854	0	-0.79558
XIAP	4	0.0060408	0.020796	0.348842	1117	3	-0.86659	0.96111	0.96112	1	17074	0	-0.86659
ZNF76	4	0.0060535	0.020838	0.349229	1118	3	-1.053	0.67742	0.70831	1	12508	1	-1.053
RPAP3	4	0.0060755	0.020907	0.350084	1119	4	-0.94507	0.99153	0.99155	1	17894	0	-0.94507
SLC25A3	4	0.0060904	0.020949	0.350478	1120	3	-1.3104	0.87692	0.87696	1	15409	0	-1.3104
BCS1L	4	0.0061	0.020981	0.350695	1121	4	-0.57939	0.9939	0.99392	1	17986	0	-0.57939
PIAS3	4	0.0061167	0.021029	0.351185	1122	4	-0.70609	0.99388	0.99391	1	17985	0	-0.70609
TIGD3	4	0.0061262	0.02106	0.351393	1123	4	-1.1537	0.99387	0.9939	1	17984	0	-1.1537
PAQR8	4	0.0061764	0.02123	0.353796	1124	4	-0.73957	0.99382	0.99385	1	17981	0	-0.73957
ORC2	4	0.0061835	0.021252	0.353796	1125	4	-0.96085	0.9897	0.98968	1	17832	0	-0.96085
PSTK	4	0.0061876	0.021261	0.353796	1126	4	-1.0693	0.98973	0.98971	1	17833	0	-1.0693
WDR73	4	0.0062405	0.021438	0.356422	1127	3	-1.4644	0.78428	0.78705	1	13841	1	-1.4644
SHISA4	4	0.0062574	0.021489	0.356747	1128	4	-1.0099	0.99101	0.991	1	17877	0	-1.0099
TAF10	4	0.0062595	0.021495	0.356747	1129	3	-1.0151	0.9686	0.96869	1	17253	0	-1.0151
DLG5	4	0.0063105	0.021649	0.358979	1130	4	-0.87674	0.99369	0.99371	1	17978	0	-0.87674
AMN	4	0.0063484	0.021772	0.3607	1131	4	-0.46007	0.99365	0.99367	1	17977	0	-0.46007
EHBP1L1	4	0.0063655	0.021832	0.361369	1132	4	-0.51514	0.99363	0.99365	1	17975	0	-0.51514
MRPS11	4	0.0063753	0.021866	0.361578	1133	4	-0.58893	0.99362	0.99364	1	17974	0	-0.58893
SENP6	4	0.0063798	0.021883	0.361578	1134	3	-1.311	0.9383	0.93833	1	16593	0	-1.311
MRPL16	4	0.0063923	0.021917	0.361826	1135	3	-0.95803	0.090415	0.1976	0.901008	4013	1	-0.95803
SMC6	4	0.0064237	0.022014	0.363102	1136	3	-0.91142	0.70709	0.72782	1	12865	1	-0.91142
AGTR2	4	0.0064357	0.022059	0.363522	1137	4	-0.3958	0.99356	0.99358	1	17971	0	-0.3958
DDX55	4	0.0064434	0.022083	0.363603	1138	2	-0.8593	0.74302	0.75363	1	13304	1	-0.8593
BAG6	4	0.0064615	0.022142	0.364248	1139	4	-0.93234	0.99076	0.99075	1	17867	0	-0.93234
FKBP2	4	0.0064721	0.022166	0.364254	1140	3	-0.86804	0.96478	0.96483	1	17159	0	-0.86804
SNF8	4	0.0064803	0.022198	0.364254	1141	4	-1.3118	0.99352	0.99354	1	17969	0	-1.3118
TAF5	4	0.0064852	0.022211	0.364254	1142	3	-0.50284	0.94257	0.94265	1	16677	0	-0.50284
SLC16A14	4	0.0064995	0.022262	0.364254	1143	3	-0.93674	0.389	0.53399	1	9632	1	-0.93674
POLR3D	4	0.0065002	0.022264	0.364254	1144	4	-0.74038	0.9935	0.99353	1	17968	0	-0.74038
MRPL41	4	0.0065039	0.022274	0.364254	1145	4	-0.64485	0.9935	0.99352	1	17967	0	-0.64485
APOL1	4	0.0065077	0.022287	0.364254	1146	4	-0.40807	0.99349	0.99352	1	17966	0	-0.40807
ZNRD1	4	0.0065102	0.022297	0.364254	1147	4	-0.50577	0.99349	0.99351	1	17965	0	-0.50577
CIAPIN1	4	0.0065393	0.022395	0.365489	1148	3	-0.66011	0.97756	0.97778	1	17455	0	-0.66011
TELO2	4	0.0065439	0.022412	0.365489	1149	4	-1.0976	0.99346	0.99347	1	17963	0	-1.0976
NDUFS3	4	0.0065673	0.022489	0.366307	1150	4	-1.2579	0.99045	0.99043	1	17852	0	-1.2579
C1orf131	4	0.0065715	0.022501	0.366307	1151	4	-1.1352	0.99343	0.99345	1	17962	0	-1.1352
MYH9	4	0.0065941	0.022573	0.36713	1152	4	-0.66369	0.99341	0.99343	1	17961	0	-0.66369
RINT1	4	0.0065991	0.022591	0.36713	1153	4	-0.46307	0.9934	0.99342	1	17960	0	-0.46307
BUD23	4	0.0066067	0.022615	0.367198	1154	4	-0.68505	0.99339	0.99342	1	17959	0	-0.68505
RFX5	4	0.0066218	0.022666	0.36772	1155	4	-0.6641	0.99338	0.9934	1	17958	0	-0.6641
GEMIN6	4	0.0066687	0.022829	0.369949	1156	4	-0.80655	0.99333	0.99335	1	17957	0	-0.80655
ATP6V1A	4	0.0066742	0.022843	0.369949	1157	3	-0.96693	0.8212	0.82121	1	14440	1	-0.96693
CIAO1	4	0.0067021	0.022936	0.370699	1158	3	-1.0139	0.95911	0.95918	1	17027	0	-1.0139
CCDC182	4	0.006703	0.022937	0.370699	1159	4	-0.48836	0.9933	0.99331	1	17956	0	-0.48836
CRYBB1	4	0.0067064	0.022949	0.370699	1160	3	-0.6255	0.95357	0.95363	1	16905	0	-0.6255
APOL2	4	0.0067401	0.023074	0.372399	1161	4	-0.56017	0.99326	0.99328	1	17953	0	-0.56017
ABCF1	4	0.0067529	0.023113	0.372717	1162	4	-1.1425	0.99325	0.99326	1	17952	0	-1.1425
PDE12	4	0.0067811	0.023202	0.373826	1163	4	-0.49509	0.99322	0.99323	1	17951	0	-0.49509
FCF1	4	0.00681	0.023297	0.375027	1164	3	-0.96501	0.58483	0.65458	1	11576	1	-0.96501
NLE1	4	0.0068327	0.023353	0.375614	1165	4	-1.0191	0.99317	0.99319	1	17950	0	-1.0191
NRBF2	4	0.0068478	0.023405	0.376123	1166	3	-0.95055	0.98682	0.98678	1	17728	0	-0.95055
P2RY6	4	0.0069269	0.023642	0.37946	1167	2	-0.65261	0.85382	0.85375	1	15002	0	-0.65261
SEC14L6	4	0.0069308	0.023653	0.37946	1168	3	-0.98352	0.94702	0.9471	1	16768	0	-0.98352
ALDH1L2	4	0.0069446	0.023696	0.37983	1169	4	-0.4172	0.99306	0.99307	1	17947	0	-0.4172
PPP1R7	4	0.0069534	0.023722	0.37992	1170	3	-1.3959	0.052283	0.12544	0.853934	2665	1	-1.3959
OGDHL	4	0.0070551	0.024061	0.385011	1171	4	-0.50778	0.99294	0.99296	1	17946	0	-0.50778
ATP5D	4	0.0070697	0.024109	0.385459	1172	4	-0.48941	0.99293	0.99295	1	17945	0	-0.48941
ADM2	4	0.0071149	0.024266	0.387636	1173	4	-0.43858	0.99289	0.9929	1	17944	0	-0.43858
MRPL11	4	0.0071376	0.024343	0.388536	1174	4	-0.92791	0.99286	0.99288	1	17943	0	-0.92791
PGP	4	0.007147	0.024378	0.388761	1175	4	-0.67571	0.99285	0.99287	1	17942	0	-0.67571
STRN	4	0.0071576	0.024415	0.38902	1176	3	-0.94528	0.82574	0.82575	1	14505	0	-0.94528
GABPB1	4	0.0071818	0.024491	0.3899	1177	4	-0.79369	0.99282	0.99283	1	17941	0	-0.79369
TTC7A	4	0.0071936	0.024529	0.390182	1178	3	-1.0905	0.95079	0.95085	1	16836	0	-1.0905
ELOA2	4	0.0072072	0.024567	0.390418	1179	3	-1.0232	0.55493	0.63913	1	11327	1	-1.0232
DHX9	4	0.0072139	0.024586	0.390418	1180	4	-0.94896	0.98966	0.98964	1	17830	0	-0.94896
HOXC4	4	0.0072681	0.024747	0.392487	1181	4	-0.94395	0.99273	0.99274	1	17939	0	-0.94395
TEFM	4	0.0072708	0.024758	0.392487	1182	4	-0.66524	0.99273	0.99274	1	17938	0	-0.66524
TUFM	4	0.0073006	0.024855	0.393654	1183	4	-0.51922	0.9927	0.99272	1	17937	0	-0.51922
GPATCH1	4	0.0073073	0.024874	0.393654	1184	2	-0.90335	0.96857	0.96867	1	17249	0	-0.90335
PEX13	4	0.0073333	0.024954	0.394591	1185	4	-0.49987	0.99267	0.99269	1	17936	0	-0.49987
CBWD6	2	0.0073443	0.014011	0.266228	1186	1	-0.96896	0.18678	0.25064	0.921326	6238	1	-0.96896
NPAT	4	0.0073594	0.025028	0.395427	1187	3	-0.96135	0.49945	0.61279	1	10872	1	-0.96135
KDM8	4	0.0074182	0.025217	0.398086	1188	4	-0.59763	0.99258	0.9926	1	17935	0	-0.59763
MARCKS	4	0.0074347	0.025265	0.398272	1189	4	-0.38096	0.99257	0.99258	1	17934	0	-0.38096
DPY30	4	0.0074374	0.025277	0.398272	1190	3	-0.75182	0.96638	0.96646	1	17195	0	-0.75182
EP400	4	0.0074435	0.025293	0.398272	1191	2	-0.52806	0.32398	0.46677	1	8518	2	-0.52806
HHLA3	4	0.0075067	0.025504	0.400403	1192	3	-0.72084	0.96548	0.96554	1	17174	0	-0.72084
EHMT2	4	0.0075107	0.02552	0.400403	1193	4	-0.50018	0.99249	0.99251	1	17933	0	-0.50018
ARNT	4	0.007516	0.025531	0.400403	1194	3	-0.902	0.98609	0.9861	1	17706	0	-0.902
MRPS18A	4	0.0075205	0.025541	0.400403	1195	4	-0.6469	0.99248	0.99249	1	17932	0	-0.6469
PLAC9	4	0.0075253	0.025556	0.400403	1196	4	-1.293	0.99083	0.99082	1	17871	0	-1.293
RAE1	4	0.0075258	0.025556	0.400403	1197	2	-0.69772	0.62605	0.67739	1	11964	1	-0.69772
SLC39A6	4	0.0075748	0.025706	0.402407	1198	4	-0.57395	0.99243	0.99244	1	17931	0	-0.57395
GPR149	4	0.0076044	0.025797	0.403165	1199	3	-0.88661	0.75144	0.76016	1	13418	1	-0.88661
LYRM4	4	0.0076196	0.025838	0.403165	1200	2	-0.62972	0.078602	0.17568	0.893647	3585	1	-0.62972
CFAP20	4	0.0076231	0.025846	0.403165	1201	3	-1.2183	0.56612	0.64476	1	11427	1	-1.2183
PRSS22	4	0.0076336	0.025875	0.403165	1202	4	-0.55967	0.99237	0.99238	1	17930	0	-0.55967
WDR83OS	4	0.0076348	0.025878	0.403165	1203	3	-0.94627	0.93006	0.93018	1	16440	0	-0.94627
TTC28	4	0.0076364	0.025883	0.403165	1204	4	-0.42873	0.99236	0.99238	1	17929	0	-0.42873
ANKRD33B	4	0.0076618	0.025956	0.403855	1205	4	-0.51507	0.99234	0.99235	1	17928	0	-0.51507
INTS8	4	0.0076773	0.025998	0.403855	1206	4	-0.47396	0.99232	0.99234	1	17926	0	-0.47396
KRI1	4	0.0076806	0.026006	0.403855	1207	2	-0.96846	0.89785	0.89782	1	15801	0	-0.96846
WTAP	4	0.0076829	0.026013	0.403855	1208	4	-0.78486	0.99232	0.99233	1	17925	0	-0.78486
CCDC74B	4	0.0077041	0.026079	0.404544	1209	4	-0.48553	0.9923	0.99231	1	17924	0	-0.48553
C1QBP	4	0.0077268	0.026156	0.405396	1210	4	-0.55913	0.99227	0.99228	1	17923	0	-0.55913
PYURF	4	0.0077438	0.026206	0.405838	1211	4	-0.68864	0.99226	0.99227	1	17922	0	-0.68864
PRKRA	4	0.0077765	0.026316	0.407211	1212	4	-0.64399	0.99222	0.99223	1	17920	0	-0.64399
DTX4	4	0.0077865	0.026346	0.407332	1213	4	-0.47339	0.99221	0.99222	1	17919	0	-0.47339
COMTD1	4	0.0078051	0.026408	0.407951	1214	4	-0.35895	0.99219	0.99221	1	17918	0	-0.35895
NRDE2	4	0.00782	0.026459	0.408398	1215	3	-1.3423	0.9003	0.90029	1	15852	0	-1.3423
GTF2B	4	0.0078308	0.026488	0.408518	1216	3	-1.1309	0.98514	0.98514	1	17677	0	-1.1309
RAB25	4	0.0078652	0.026599	0.40989	1217	4	-0.42526	0.99213	0.99214	1	17917	0	-0.42526
EIF2B1	4	0.0078832	0.026656	0.41044	1218	3	-0.91544	0.52223	0.62332	1	11066	1	-0.91544
SLC25A28	4	0.0079263	0.026795	0.412023	1219	3	-0.8773	0.38474	0.5296	1	9551	1	-0.8773
METTL14	4	0.0079287	0.026803	0.412023	1220	3	-1.3574	0.92732	0.92748	1	16383	0	-1.3574
NBAS	4	0.0079552	0.026877	0.412751	1221	3	-1.1937	0.97417	0.97433	1	17369	0	-1.1937
MRPL44	4	0.0079606	0.026895	0.412751	1222	4	-0.804	0.992	0.99201	1	17914	0	-0.804
ATG4C	4	0.0079721	0.026933	0.412996	1223	4	-0.50925	0.99203	0.99204	1	17916	0	-0.50925
FRMPD1	4	0.007991	0.026994	0.413415	1224	4	-0.5571	0.99201	0.99202	1	17915	0	-0.5571
TSR3	4	0.0080002	0.027021	0.413415	1225	2	-0.51189	0.29942	0.44146	1	8080	2	-0.51189
IBA57	4	0.0080026	0.027026	0.413415	1226	4	-1.1965	0.992	0.99201	1	17913	0	-1.1965
DPM3	4	0.0080143	0.02706	0.413602	1227	4	-0.80655	0.99199	0.992	1	17912	0	-0.80655
ZBTB39	4	0.0080391	0.027147	0.414596	1228	4	-0.66295	0.99196	0.99197	1	17910	0	-0.66295
ADPRHL1	4	0.0080493	0.027177	0.41471	1229	3	-0.83651	0.76496	0.7708	1	13579	1	-0.83651
C19orf43	4	0.0081035	0.027352	0.417037	1230	4	-0.71822	0.9919	0.99191	1	17908	0	-0.71822
GSC2	4	0.0081222	0.027413	0.417623	1231	3	-0.85893	0.05505	0.13088	0.860049	2762	1	-0.85893
TAF1B	4	0.0081637	0.027539	0.419034	1232	3	-0.9409	0.076605	0.17192	0.891145	3520	1	-0.9409
C19orf70	4	0.0081669	0.02755	0.419034	1233	4	-0.54999	0.99183	0.99185	1	17906	0	-0.54999
GNMT	4	0.0081802	0.027586	0.41924	1234	4	-0.39023	0.99182	0.99183	1	17905	0	-0.39023
MMS22L	4	0.0082336	0.027755	0.421474	1235	4	-0.73102	0.99177	0.99178	1	17904	0	-0.73102
DOCK6	4	0.0082604	0.027845	0.422502	1236	4	-0.58922	0.99174	0.99175	1	17903	0	-0.58922
GTF2A2	4	0.0083052	0.027983	0.42425	1237	4	-1.0233	0.99169	0.99171	1	17902	0	-1.0233
FAM136A	4	0.0083562	0.028144	0.426234	1238	4	-0.5883	0.99164	0.99166	1	17900	0	-0.5883
PRPF18	4	0.0083607	0.02816	0.426234	1239	3	-0.93508	0.90587	0.90592	1	15956	0	-0.93508
RASGRP2	4	0.0083908	0.028247	0.427208	1240	4	-0.45843	0.99161	0.99163	1	17899	0	-0.45843
RASD2	4	0.0084204	0.028343	0.428154	1241	3	-1.1275	0.83065	0.83072	1	14597	0	-1.1275
TARS2	4	0.0084241	0.028355	0.428154	1242	4	-0.66951	0.99158	0.9916	1	17898	0	-0.66951
TARBP2	4	0.0084559	0.028465	0.429429	1243	4	-0.60907	0.99154	0.99156	1	17897	0	-0.60907
MPHOSPH10	4	0.008462	0.028487	0.429429	1244	4	-0.53977	0.99154	0.99155	1	17896	0	-0.53977
C9orf50	4	0.008468	0.028508	0.429429	1245	4	-0.43563	0.99153	0.99155	1	17895	0	-0.43563
PPRC1	4	0.0084817	0.028547	0.429444	1246	4	-0.82561	0.99152	0.99153	1	17892	0	-0.82561
LAMB2	4	0.0084863	0.02857	0.429444	1247	4	-0.5132	0.99151	0.99153	1	17891	0	-0.5132
EXOSC9	4	0.0084893	0.028578	0.429444	1248	4	-0.45523	0.99151	0.99153	1	17890	0	-0.45523
FOXI3	4	0.0084979	0.028606	0.42952	1249	3	-0.7068	0.92089	0.92102	1	16263	0	-0.7068
PPIE	4	0.0085234	0.028693	0.43021	1250	3	-0.86077	0.56525	0.64435	1	11419	1	-0.86077
POP4	4	0.0085255	0.028698	0.43021	1251	4	-1.2291	0.99085	0.99084	1	17872	0	-1.2291
USP14	4	0.0085526	0.028786	0.431187	1252	2	-0.33048	0.17052	0.3083	0.960151	5949	2	-0.33048
PHF12	4	0.0085701	0.028844	0.431368	1253	2	-0.55334	0.8312	0.83127	1	14605	0	-0.55334
LMTK3	4	0.0085702	0.028844	0.431368	1254	4	-0.62354	0.99143	0.99145	1	17887	0	-0.62354
GFPT1	4	0.008591	0.028917	0.432121	1255	3	-0.77361	0.96365	0.96371	1	17133	0	-0.77361
TOMM20	4	0.0086125	0.028984	0.432778	1256	3	-1.2576	0.54386	0.63363	1	11234	1	-1.2576
GTF3C2	4	0.0086463	0.02911	0.434231	1257	2	-0.56569	0.46288	0.59643	1	10604	1	-0.56569
PRPF3	4	0.0086522	0.029128	0.434231	1258	3	-1.3985	0.65809	0.69632	1	12313	1	-1.3985
IVNS1ABP	4	0.0086746	0.029216	0.435199	1259	3	-0.88914	0.7515	0.76021	1	13419	1	-0.88914
GPX7	4	0.0086993	0.029296	0.435765	1260	3	-0.94161	0.59043	0.65757	1	11631	1	-0.94161
CEBPB	4	0.0087043	0.029314	0.435765	1261	4	-0.68898	0.9913	0.9913	1	17885	0	-0.68898
C9orf16	4	0.0087077	0.029324	0.435765	1262	4	-0.85791	0.98982	0.98979	1	17839	0	-0.85791
UTP6	4	0.008757	0.029483	0.437148	1263	2	-0.81179	0.91356	0.9136	1	16126	0	-0.81179
RAD51C	4	0.0087618	0.029499	0.437148	1264	4	-0.59171	0.99124	0.99125	1	17884	0	-0.59171
C9orf84	4	0.0087665	0.029516	0.437148	1265	4	-0.51541	0.99123	0.99124	1	17883	0	-0.51541
ALG2	4	0.0087681	0.029521	0.437148	1266	4	-1.1056	0.99123	0.99124	1	17882	0	-1.1056
CDK11B	4	0.0087715	0.029533	0.437148	1267	3	-0.91976	0.9806	0.9807	1	17550	0	-0.91976
POLR3C	4	0.0088717	0.029846	0.441426	1268	3	-0.83526	0.91983	0.91997	1	16249	0	-0.83526
DDX43	4	0.0088982	0.029925	0.442256	1269	4	-0.5315	0.9911	0.99109	1	17881	0	-0.5315
CRB2	4	0.0089598	0.030122	0.444816	1270	4	-0.48654	0.99104	0.99103	1	17878	0	-0.48654
WAC	4	0.0089856	0.030207	0.445712	1271	3	-1.1335	0.98242	0.98247	1	17603	0	-1.1335
KIF14	4	0.0090027	0.030264	0.446014	1272	4	-0.84329	0.991	0.99099	1	17876	0	-0.84329
CLPTM1	4	0.0090082	0.030279	0.446014	1273	3	-1.0074	0.7785	0.78199	1	13773	1	-1.0074
UBE2V1	4	0.0090168	0.030307	0.446014	1274	3	-0.94401	0.83667	0.83668	1	14686	0	-0.94401
TRIM8	4	0.0090201	0.030323	0.446014	1275	3	-0.90625	0.94215	0.94222	1	16668	0	-0.90625
PRC1	4	0.0090742	0.030505	0.44835	1276	3	-1.5245	0.98522	0.98523	1	17678	0	-1.5245
RMND1	4	0.0090824	0.030532	0.448394	1277	4	-0.55125	0.99092	0.99091	1	17874	0	-0.55125
C22orf46	4	0.0091	0.030582	0.448779	1278	4	-0.46217	0.9909	0.99089	1	17873	0	-0.46217
KAT2A	4	0.0091524	0.03075	0.450882	1279	3	-1.3029	0.98491	0.98492	1	17671	0	-1.3029
KNL1	4	0.0091869	0.030863	0.452193	1280	4	-1.0015	0.99081	0.9908	1	17870	0	-1.0015
TCHHL1	4	0.0092056	0.030929	0.452806	1281	3	-0.77429	0.9607	0.96076	1	17059	0	-0.77429
PRPF40A	4	0.0092129	0.030954	0.452816	1282	3	-0.85122	0.92446	0.92462	1	16329	0	-0.85122
RRM2	4	0.0092711	0.031137	0.455141	1283	4	-0.72646	0.99073	0.99073	1	17866	0	-0.72646
SYT11	4	0.0093036	0.031243	0.456336	1284	3	-0.98262	0.81063	0.81093	1	14262	1	-0.98262
RNF123	4	0.0093118	0.031271	0.456389	1285	4	-0.48695	0.99069	0.99068	1	17864	0	-0.48695
SRP19	4	0.0093343	0.03133	0.456889	1286	3	-0.86106	0.92241	0.92255	1	16286	0	-0.86106
PWP1	4	0.009351	0.031389	0.457396	1287	4	-0.52593	0.99065	0.99063	1	17863	0	-0.52593
FGF21	4	0.0093756	0.031481	0.458378	1288	4	-0.56592	0.99062	0.99062	1	17862	0	-0.56592
C1orf56	4	0.0093904	0.031523	0.458535	1289	4	-0.68916	0.99061	0.9906	1	17860	0	-0.68916
ENGASE	4	0.0093953	0.03154	0.458535	1290	4	-0.6432	0.9906	0.9906	1	17859	0	-0.6432
FAM20B	4	0.0094076	0.03158	0.45863	1291	3	-0.83502	0.98513	0.98513	1	17676	0	-0.83502
C1QTNF1	4	0.0094133	0.031596	0.45863	1292	4	-0.76224	0.99059	0.99058	1	17858	0	-0.76224
PAFAH1B1	4	0.0094265	0.031629	0.45875	1293	4	-0.74065	0.99057	0.99056	1	17857	0	-0.74065
FBXO28	4	0.0094451	0.03169	0.459262	1294	3	-0.91576	0.9855	0.9855	1	17684	0	-0.91576
RUFY2	4	0.0094529	0.031723	0.459262	1295	4	-0.52153	0.99055	0.99053	1	17854	0	-0.52153
SRPRB	4	0.0094594	0.031737	0.459262	1296	3	-0.71413	0.81962	0.81966	1	14418	1	-0.71413
TRIM46	4	0.0094693	0.031769	0.459365	1297	3	-0.9266	0.91224	0.91225	1	16103	0	-0.9266
CAGE1	4	0.0094827	0.031809	0.459591	1298	3	-0.8328	0.65891	0.69682	1	12325	1	-0.8328
SDHB	4	0.0095123	0.031903	0.460587	1299	3	-0.77135	0.44003	0.58657	1	10450	1	-0.77135
PDGFRA	4	0.0095258	0.03195	0.460802	1300	3	-0.85303	0.36802	0.51235	1	9275	1	-0.85303
AMPD1	4	0.0095447	0.032009	0.460802	1301	3	-0.8236	0.9185	0.91857	1	16219	0	-0.8236
TRNT1	4	0.0095486	0.032022	0.460802	1302	4	-1.2358	0.98978	0.98975	1	17836	0	-1.2358
RTEL1	4	0.0095528	0.032034	0.460802	1303	3	-1.0336	0.98828	0.9883	1	17778	0	-1.0336
MEIG1	4	0.0095548	0.03204	0.460802	1304	2	-0.43131	0.24422	0.3845	0.995676	7184	2	-0.43131
MYBPC3	4	0.0095745	0.032112	0.461473	1305	3	-0.94192	0.78534	0.78798	1	13866	1	-0.94192
DNTTIP2	4	0.0095934	0.032167	0.461916	1306	3	-1.039	0.96993	0.96998	1	17282	0	-1.039
SLC30A9	4	0.0096741	0.032435	0.465063	1307	4	-0.53519	0.99033	0.99032	1	17851	0	-0.53519
P3H1	4	0.0096754	0.032436	0.465063	1308	2	-0.30306	0.47358	0.60113	1	10686	1	-0.30306
ZNF136	4	0.0096845	0.032468	0.465161	1309	3	-1.0192	0.092086	0.20069	0.902715	4069	1	-1.0192
NTF4	4	0.009701	0.032521	0.465267	1310	4	-0.54825	0.9903	0.99029	1	17850	0	-0.54825
GLIS1	4	0.0097077	0.032544	0.465267	1311	4	-0.59939	0.99029	0.99028	1	17849	0	-0.59939
NOP53	4	0.0097093	0.032549	0.465267	1312	3	-1.2959	0.89167	0.89166	1	15684	0	-1.2959
CATSPER3	4	0.0097195	0.032586	0.465433	1313	4	-0.39589	0.99028	0.99027	1	17848	0	-0.39589
ECT2	4	0.0097953	0.032813	0.468327	1314	3	-1.0148	0.98001	0.98011	1	17526	0	-1.0148
LENG8	4	0.0098118	0.032865	0.468633	1315	3	-0.79086	0.14227	0.27875	0.94141	5462	1	-0.79086
RAB11B	4	0.0098227	0.032901	0.468633	1316	4	-0.50305	0.99018	0.99016	1	17847	0	-0.50305
FAM186A	4	0.009831	0.032926	0.468633	1317	3	-0.93077	0.93061	0.93074	1	16450	0	-0.93077
COPS5	4	0.0098337	0.032935	0.468633	1318	3	-1.1124	0.82106	0.82109	1	14437	1	-1.1124
APOA1	4	0.009853	0.032988	0.469036	1319	3	-0.65476	0.6246	0.67655	1	11948	1	-0.65476
ZNF75A	4	0.009865	0.033029	0.469258	1320	3	-1.0318	0.79878	0.79995	1	14071	1	-1.0318
ATXN7L2	4	0.0098944	0.033118	0.470177	1321	3	-0.92655	0.88854	0.88855	1	15610	0	-0.92655
LAMTOR2	4	0.0099025	0.033144	0.470181	1322	3	-1.1321	0.88009	0.88013	1	15458	0	-1.1321
PRG3	4	0.0099454	0.033272	0.471644	1323	4	-0.45599	0.99005	0.99002	1	17846	0	-0.45599
BOLA3	4	0.0099581	0.033304	0.471744	1324	3	-0.83467	0.87353	0.87353	1	15356	0	-0.83467
LOXL1	4	0.010019	0.0335	0.47416	1325	4	-0.49948	0.98998	0.98995	1	17845	0	-0.49948
DNM3	4	0.010054	0.033608	0.475184	1326	4	-0.57741	0.98995	0.98992	1	17843	0	-0.57741
FAM178B	4	0.010058	0.033623	0.475184	1327	3	-0.73454	0.57099	0.64725	1	11475	1	-0.73454
EFCAB12	4	0.010068	0.033655	0.475184	1328	4	-0.46223	0.98993	0.9899	1	17842	0	-0.46223
KMT5A	4	0.010075	0.033674	0.475184	1329	3	-1.2071	0.91088	0.91089	1	16070	0	-1.2071
ASIC1	4	0.01009	0.033719	0.475467	1330	4	-0.58203	0.98991	0.98988	1	17841	0	-0.58203
CTDSPL2	4	0.010162	0.033943	0.478264	1331	3	-0.77916	0.97757	0.97778	1	17456	0	-0.77916
GUCA2B	4	0.010187	0.034024	0.478621	1332	3	-0.79515	0.35868	0.50269	1	9122	1	-0.79515
MS4A12	4	0.010193	0.034039	0.478621	1333	4	-0.48397	0.98981	0.98978	1	17838	0	-0.48397
TOP1MT	4	0.010194	0.034045	0.478621	1334	4	-0.52985	0.98981	0.98977	1	17837	0	-0.52985
FAM49A	4	0.010231	0.034155	0.479812	1335	2	-0.35612	0.16293	0.30033	0.955487	5814	2	-0.35612
TKT	4	0.01025	0.034219	0.48035	1336	4	-1.052	0.98975	0.98972	1	17835	0	-1.052
PPCS	4	0.010266	0.034275	0.480776	1337	4	-0.53528	0.98973	0.98971	1	17834	0	-0.53528
EIF1AD	4	0.010301	0.034387	0.481985	1338	3	-1.0435	0.9554	0.95545	1	16940	0	-1.0435
PPP4C	4	0.010309	0.034415	0.482017	1339	3	-0.80855	0.49056	0.60868	1	10806	1	-0.80855
TMEM219	4	0.010319	0.034452	0.482175	1340	4	-0.44551	0.98968	0.98965	1	17831	0	-0.44551
MTERF4	4	0.010352	0.034564	0.48338	1341	4	-0.5104	0.98965	0.98962	1	17828	0	-0.5104
SNRNP35	4	0.010377	0.034637	0.484038	1342	4	-1.1796	0.98962	0.9896	1	17826	0	-1.1796
BCKDK	4	0.010403	0.034724	0.484902	1343	3	-0.79148	0.68572	0.71368	1	12595	1	-0.79148
C5orf49	4	0.010443	0.034854	0.486346	1344	3	-0.8517	0.34726	0.49096	1	8911	1	-0.8517
ZNF488	4	0.010484	0.034993	0.48714	1345	4	-0.31923	0.98952	0.9895	1	17823	0	-0.31923
MIS18A	4	0.010487	0.035001	0.48714	1346	4	-0.93352	0.98951	0.98949	1	17822	0	-0.93352
MTG2	4	0.010498	0.035035	0.48714	1347	4	-0.78867	0.9895	0.98949	1	17821	0	-0.78867
GTF2E1	4	0.010499	0.035038	0.48714	1348	3	-0.77342	0.97538	0.97555	1	17399	0	-0.77342
HOMER3	4	0.0105	0.035041	0.48714	1349	4	-0.54941	0.9895	0.98949	1	17820	0	-0.54941
GPIHBP1	4	0.010507	0.035067	0.48714	1350	4	-0.53626	0.98949	0.98948	1	17819	0	-0.53626
KLRK1	4	0.010595	0.035337	0.489588	1351	3	-0.88081	0.91021	0.91024	1	16058	0	-0.88081
RND1	4	0.010596	0.03534	0.489588	1352	4	-0.66465	0.9894	0.9894	1	17818	0	-0.66465
RRP7A	4	0.010602	0.035354	0.489588	1353	4	-0.56807	0.9894	0.9894	1	17817	0	-0.56807
CERS2	4	0.010605	0.035362	0.489588	1354	4	-0.48948	0.98939	0.98939	1	17816	0	-0.48948
WDR26	4	0.010609	0.035373	0.489588	1355	4	-1.0195	0.98939	0.98939	1	17815	0	-1.0195
RFWD3	4	0.010661	0.035538	0.491497	1356	2	-0.69946	0.93555	0.9356	1	16539	0	-0.69946
GINS2	4	0.010705	0.03565	0.492154	1357	3	-0.89987	0.98609	0.9861	1	17707	0	-0.89987
RMDN3	4	0.010706	0.035658	0.492154	1358	4	-0.62856	0.98929	0.98929	1	17813	0	-0.62856
CMAS	4	0.010708	0.035664	0.492154	1359	3	-0.96478	0.96152	0.96154	1	17079	0	-0.96478
MNAT1	4	0.010739	0.035762	0.493153	1360	3	-0.85993	0.98656	0.98652	1	17718	0	-0.85993
NUBP2	4	0.010752	0.0358	0.493307	1361	3	-0.81385	0.92611	0.92628	1	16363	0	-0.81385
ZSCAN20	4	0.010792	0.035908	0.494286	1362	3	-0.99812	0.92667	0.92685	1	16373	0	-0.99812
PLEKHM2	4	0.01083	0.035981	0.494286	1363	3	-0.89886	0.87321	0.87321	1	15352	0	-0.89886
RANBP17	4	0.010837	0.035993	0.494286	1364	2	-0.7498	0.22708	0.36688	0.99081	6887	2	-0.7498
PRKX	4	0.010842	0.036004	0.494286	1365	3	-1.0129	0.983	0.98304	1	17617	0	-1.0129
ZRSR2	4	0.01085	0.036024	0.494286	1366	3	-0.98524	0.96661	0.96668	1	17200	0	-0.98524
MCL1	4	0.01086	0.036051	0.494286	1367	3	-0.93622	0.95106	0.95114	1	16841	0	-0.93622
CMTM3	4	0.010863	0.036055	0.494286	1368	2	-0.31616	0.96678	0.96685	1	17208	0	-0.31616
SNRPA1	4	0.010981	0.036314	0.497469	1369	3	-0.82108	0.51351	0.61917	1	10995	1	-0.82108
MBD6	4	0.010994	0.036351	0.497604	1370	2	-0.45196	0.77272	0.77719	1	13690	1	-0.45196
EEFSEC	4	0.011096	0.036587	0.500477	1371	3	-0.60294	0.84069	0.84059	1	14758	0	-0.60294
RIT1	4	0.011114	0.036634	0.500754	1372	3	-0.7602	0.94605	0.9461	1	16749	0	-0.7602
GPKOW	4	0.011126	0.036665	0.500808	1373	3	-0.89968	0.6712	0.70436	1	12440	1	-0.89968
FBXO11	4	0.011156	0.03673	0.501337	1374	3	-0.82493	0.98439	0.9844	1	17654	0	-0.82493
TRAPPC5	4	0.011212	0.036853	0.502285	1375	3	-0.93092	0.62548	0.67707	1	11958	1	-0.93092
CHM	4	0.011232	0.036898	0.50252	1376	2	-0.81944	0.94587	0.94591	1	16743	0	-0.81944
HCFC1R1	4	0.011245	0.036924	0.50252	1377	3	-0.86181	0.72435	0.73998	1	13079	1	-0.86181
RBM8A	4	0.011258	0.036951	0.50252	1378	3	-1.2908	0.011564	0.038321	0.701484	993	1	-1.2908
TBC1D17	4	0.011278	0.036999	0.502809	1379	2	-0.55739	0.013127	0.043118	0.709238	1101	2	-0.55739
CHRM4	4	0.011338	0.037127	0.504187	1380	2	-0.59245	0.62896	0.67905	1	11994	1	-0.59245
TANK	4	0.011372	0.037213	0.504983	1381	2	-0.74439	0.47874	0.60342	1	10723	1	-0.74439
SEC61A1	4	0.011402	0.037283	0.50557	1382	3	-0.87335	0.5926	0.65874	1	11646	1	-0.87335
CCDC174	4	0.011447	0.037386	0.506599	1383	3	-0.56367	0.95063	0.9507	1	16834	0	-0.56367
NAGPA	4	0.011502	0.037496	0.507728	1384	3	-0.75124	0.76467	0.77056	1	13577	1	-0.75124
FRS3	4	0.011564	0.03763	0.509169	1385	2	-0.22428	0.23687	0.37702	0.993668	7054	2	-0.22428
PPIL4	4	0.011587	0.037686	0.509558	1386	3	-0.99389	0.63907	0.6849	1	12091	1	-0.99389
FAM212B	4	0.011726	0.037996	0.513386	1387	2	-0.32466	0.80511	0.80572	1	14157	1	-0.32466
CD1C	4	0.011749	0.03805	0.51375	1388	3	-0.92526	0.98288	0.98292	1	17614	0	-0.92526
TP53RK	4	0.011885	0.038347	0.517384	1389	3	-0.81536	0.85984	0.85975	1	15108	0	-0.81536
TLX1	4	0.011917	0.038433	0.518172	1390	3	-0.7953	0.057238	0.13507	0.864775	2842	1	-0.7953
RNF40	4	0.011939	0.038483	0.518468	1391	2	-0.87808	0.065124	0.15027	0.879979	3108	1	-0.87808
NXNL1	4	0.011964	0.03854	0.518662	1392	3	-0.69719	0.98903	0.98903	1	17806	0	-0.69719
OXSR1	4	0.01197	0.038553	0.518662	1393	3	-0.58672	0.98866	0.98868	1	17792	0	-0.58672
ASNA1	4	0.012014	0.038657	0.51931	1394	3	-0.8081	0.96662	0.96669	1	17201	0	-0.8081
SNX22	4	0.01202	0.038669	0.51931	1395	3	-0.63082	0.85948	0.85938	1	15100	0	-0.63082
MIER1	4	0.012039	0.038704	0.51931	1396	3	-0.77364	0.9335	0.9336	1	16508	0	-0.77364
EP300	4	0.012042	0.038711	0.51931	1397	3	-0.69294	0.95947	0.95954	1	17035	0	-0.69294
PYROXD2	4	0.012092	0.038824	0.520453	1398	3	-0.70871	0.95302	0.9531	1	16891	0	-0.70871
MOGS	4	0.012125	0.0389	0.520982	1399	2	-0.71935	0.77378	0.77805	1	13708	1	-0.71935
TMEM151B	4	0.012133	0.038919	0.520982	1400	3	-1.2702	0.90266	0.90271	1	15899	0	-1.2702
ZNF696	4	0.012161	0.038987	0.521515	1401	3	-1.0293	0.9841	0.98411	1	17647	0	-1.0293
OR6C70	4	0.012199	0.039076	0.522328	1402	3	-1.0231	0.96021	0.96028	1	17050	0	-1.0231
STMN3	4	0.01231	0.039323	0.525257	1403	3	-1.0426	0.46189	0.59601	1	10593	1	-1.0426
TBC1D2	4	0.012325	0.039359	0.525369	1404	2	-0.63602	0.83904	0.83897	1	14726	0	-0.63602
USF2	4	0.012415	0.039557	0.527462	1405	2	-0.7313	0.73814	0.74991	1	13246	1	-0.7313
FAM8A1	4	0.012422	0.039572	0.527462	1406	2	-0.57823	0.72783	0.74246	1	13123	1	-0.57823
NPY2R	4	0.012438	0.039611	0.527551	1407	3	-0.64759	0.91048	0.91049	1	16065	0	-0.64759
MED7	4	0.01245	0.039638	0.527551	1408	3	-0.90124	0.47737	0.60279	1	10716	1	-0.90124
ZFC3H1	4	0.012464	0.039663	0.527551	1409	3	-0.77813	0.98573	0.98572	1	17693	0	-0.77813
CALR3	4	0.012485	0.039706	0.527624	1410	2	-0.65072	0.76454	0.77048	1	13576	1	-0.65072
LARGE2	4	0.012495	0.039725	0.527624	1411	3	-0.87934	0.79621	0.7976	1	14039	1	-0.87934
DIS3	4	0.012653	0.04006	0.531693	1412	3	-0.71468	0.97937	0.97952	1	17503	0	-0.71468
MYBPHL	4	0.012696	0.040162	0.532675	1413	3	-0.54457	0.92475	0.9249	1	16335	0	-0.54457
NEUROG1	4	0.012714	0.040199	0.532782	1414	3	-0.66486	0.36315	0.5073	1	9187	1	-0.66486
ATP6V1G1	4	0.012776	0.040349	0.534391	1415	3	-0.78736	0.79314	0.79486	1	13989	1	-0.78736
NELFB	4	0.012805	0.040406	0.534769	1416	3	-0.72115	0.96258	0.96262	1	17106	0	-0.72115
TMEM208	4	0.012835	0.040467	0.535202	1417	3	-0.78463	0.41103	0.55688	1	10013	1	-0.78463
PTK2	4	0.012864	0.040529	0.535641	1418	3	-0.69744	0.96078	0.96082	1	17065	0	-0.69744
CCDC97	4	0.012929	0.040685	0.537327	1419	3	-0.78213	0.68715	0.7146	1	12610	1	-0.78213
ATP5H	4	0.012971	0.040768	0.537929	1420	2	-0.7071	0.59407	0.65951	1	11655	1	-0.7071
TAF2	4	0.012978	0.040788	0.537929	1421	2	-0.84299	0.42543	0.57177	1	10225	2	-0.84299
TANGO6	4	0.012992	0.040818	0.537948	1422	3	-1.1328	0.97911	0.97925	1	17496	0	-1.1328
RPS16	4	0.013034	0.040912	0.538808	1423	3	-1.107	0.054946	0.13069	0.860049	2752	1	-1.107
UBE4B	4	0.013104	0.041059	0.540368	1424	3	-0.70702	0.98842	0.98845	1	17784	0	-0.70702
ARIH1	4	0.01318	0.041215	0.542038	1425	3	-0.89805	0.84685	0.84678	1	14865	0	-0.89805
RGS4	4	0.013236	0.041354	0.543489	1426	3	-0.76775	0.31781	0.4605	1	8418	1	-0.76775
PIN1	4	0.013343	0.041588	0.546173	1427	3	-0.77961	0.97866	0.97883	1	17485	0	-0.77961
HNMT	4	0.013357	0.041619	0.5462	1428	2	-0.74791	0.81329	0.8135	1	14304	1	-0.74791
TLR9	4	0.013423	0.041768	0.547777	1429	3	-0.71528	0.98748	0.98748	1	17748	0	-0.71528
TUBB4B	4	0.013511	0.041966	0.549982	1430	3	-0.65925	0.86715	0.86707	1	15246	0	-0.65925
TRAPPC4	4	0.013578	0.042126	0.551693	1431	3	-1.2014	0.97466	0.97481	1	17379	0	-1.2014
MED27	4	0.013666	0.042323	0.553892	1432	3	-0.65315	0.50236	0.61411	1	10893	1	-0.65315
NUPR1	4	0.013738	0.042486	0.55564	1433	3	-0.84655	0.86922	0.86919	1	15280	0	-0.84655
FBF1	4	0.013774	0.042562	0.556239	1434	1	0.28372	0.36822	0.51257	1	9280	2	0.28372
PYDC1	4	0.013814	0.042659	0.55712	1435	2	-0.39939	0.75869	0.76581	1	13499	1	-0.39939
TUBGCP5	4	0.01384	0.04272	0.557532	1436	3	-0.59256	0.98248	0.98252	1	17604	0	-0.59256
RDH13	4	0.013954	0.042984	0.56058	1437	3	-1.0652	0.98239	0.98243	1	17601	0	-1.0652
COX6B1	4	0.013967	0.043014	0.560583	1438	3	-0.86438	0.98824	0.98825	1	17776	0	-0.86438
DACT1	4	0.014019	0.043131	0.561467	1439	3	-0.97942	0.36887	0.51326	1	9289	1	-0.97942
DIP2B	4	0.014025	0.043141	0.561467	1440	3	-0.69628	0.97944	0.97957	1	17508	0	-0.69628
REV3L	4	0.014088	0.04329	0.563014	1441	3	-0.86967	0.95671	0.95676	1	16977	0	-0.86967
AP3D1	4	0.014105	0.043329	0.563125	1442	3	-0.65264	0.85943	0.85933	1	15099	0	-0.65264
ADRM1	4	0.014138	0.043406	0.563736	1443	3	-0.75596	0.84484	0.84476	1	14834	0	-0.75596
SCFD1	4	0.014199	0.043545	0.565148	1444	3	-0.90039	0.83854	0.83848	1	14717	0	-0.90039
TOR2A	4	0.014258	0.043681	0.566524	1445	3	-0.63066	0.80573	0.80631	1	14167	1	-0.63066
ACIN1	4	0.014279	0.043726	0.566714	1446	3	-0.80764	0.14106	0.27748	0.940061	5441	1	-0.80764
NOMO1	4	0.014373	0.043934	0.569023	1447	3	-0.80807	0.97959	0.97973	1	17514	0	-0.80807
MCM3AP	4	0.014401	0.044008	0.569587	1448	3	-1.0265	0.96549	0.96555	1	17175	0	-1.0265
GSPT1	4	0.01442	0.044053	0.569775	1449	3	-1.1918	0.59567	0.6604	1	11665	1	-1.1918
NUP54	4	0.014472	0.04417	0.570897	1450	3	-1.1789	0.64064	0.68584	1	12111	1	-1.1789
KRR1	4	0.014517	0.044273	0.571833	1451	2	-0.76956	0.33653	0.47984	1	8738	2	-0.76956
TAF1C	4	0.014556	0.044365	0.572619	1452	3	-0.85962	0.98553	0.98553	1	17685	0	-0.85962
SURF6	4	0.014733	0.044756	0.576782	1453	3	-0.87325	0.85017	0.85009	1	14939	0	-0.87325
DDX47	4	0.01475	0.044794	0.576782	1454	2	-0.87391	0.88547	0.88548	1	15562	0	-0.87391
ALYREF	4	0.014754	0.044803	0.576782	1455	3	-0.71843	0.69942	0.72268	1	12767	1	-0.71843
SLC22A18AS	4	0.014758	0.04481	0.576782	1456	3	-0.86382	0.69253	0.71812	1	12682	1	-0.86382
RABGGTA	4	0.014804	0.044924	0.577658	1457	3	-0.90552	0.98227	0.98231	1	17599	0	-0.90552
RHOC	4	0.014815	0.044952	0.577658	1458	3	-0.66656	0.96312	0.96317	1	17122	0	-0.66656
FRAT2	4	0.014822	0.044971	0.577658	1459	3	-0.74499	0.90965	0.90967	1	16044	0	-0.74499
CSNK1A1	4	0.014841	0.04501	0.577771	1460	3	-0.89178	0.85505	0.85498	1	15020	0	-0.89178
BIRC5	4	0.014854	0.04505	0.577891	1461	3	-0.70079	0.72305	0.73904	1	13065	1	-0.70079
SNU13	4	0.01493	0.045244	0.579973	1462	3	-0.83858	0.1742	0.31211	0.962017	6009	1	-0.83858
SLC6A17	4	0.015023	0.04546	0.582349	1463	3	-0.84297	0.92645	0.92663	1	16369	0	-0.84297
RBM15	4	0.015063	0.045553	0.582744	1464	3	-0.96037	0.73678	0.74887	1	13231	1	-0.96037
PLK4	4	0.015146	0.045734	0.584654	1465	3	-0.81969	0.95644	0.9565	1	16969	0	-0.81969
DDX24	4	0.015186	0.045806	0.585187	1466	3	-1.046	0.32481	0.46765	1	8529	1	-1.046
DAB2	4	0.015226	0.045894	0.585907	1467	3	-0.78973	0.96204	0.96206	1	17096	0	-0.78973
TMEM63B	4	0.015273	0.045992	0.586558	1468	3	-0.78737	0.9153	0.9154	1	16158	0	-0.78737
IL23R	4	0.01528	0.046008	0.586558	1469	3	-0.96074	0.95979	0.95985	1	17042	0	-0.96074
THOC7	4	0.015324	0.046112	0.587485	1470	3	-1.0191	0.82536	0.82535	1	14496	0	-1.0191
FGFR1	4	0.015382	0.046233	0.58816	1471	3	-0.77587	0.878	0.87804	1	15420	0	-0.77587
PSMD11	4	0.015397	0.046268	0.58816	1472	3	-0.91403	0.93782	0.93788	1	16583	0	-0.91403
TCTEX1D1	4	0.015401	0.046282	0.58816	1473	3	-0.86783	0.98123	0.98129	1	17570	0	-0.86783
URB1	4	0.015405	0.04629	0.58816	1474	3	-1.2069	0.97198	0.97213	1	17332	0	-1.2069
PRELID3B	4	0.015549	0.046619	0.591805	1475	3	-0.67731	0.73766	0.74955	1	13245	1	-0.67731
P2RX4	4	0.015559	0.04664	0.591805	1476	2	-0.43263	0.073475	0.16603	0.889997	3404	2	-0.43263
UNC93B1	4	0.01559	0.046709	0.592282	1477	2	-0.41445	0.12556	0.25975	0.926466	5164	2	-0.41445
RRAGA	4	0.015629	0.046795	0.592972	1478	3	-0.66479	0.84993	0.84987	1	14935	0	-0.66479
SKP2	4	0.015662	0.046876	0.593588	1479	3	-0.85478	0.97723	0.97744	1	17447	0	-0.85478
NMT1	4	0.015784	0.047161	0.596633	1480	3	-0.88398	0.45461	0.59278	1	10554	1	-0.88398
WDFY4	4	0.015792	0.04718	0.596633	1481	2	-0.28925	0.34493	0.48849	1	8876	2	-0.28925
MCM3	4	0.015839	0.047279	0.597492	1482	3	-0.91208	0.38746	0.53241	1	9603	1	-0.91208
ADO	4	0.015872	0.047362	0.59813	1483	2	-0.38234	0.51465	0.61972	1	11001	1	-0.38234
TOPBP1	4	0.015944	0.047528	0.599416	1484	3	-0.82452	0.21956	0.35914	0.985997	6767	1	-0.82452
CENPF	4	0.015982	0.047628	0.600277	1485	3	-0.78052	0.90062	0.90062	1	15860	0	-0.78052
TBCD	4	0.016066	0.047812	0.602188	1486	2	-0.52454	0.24757	0.38802	0.996018	7248	2	-0.52454
PIM3	4	0.016097	0.047882	0.602339	1487	2	-0.27826	0.11351	0.23886	0.916346	4786	2	-0.27826
MRPL43	4	0.016102	0.047892	0.602339	1488	3	-0.69354	0.98112	0.98117	1	17565	0	-0.69354
IGBP1	4	0.016124	0.047937	0.602339	1489	3	-0.92676	0.98809	0.98811	1	17768	0	-0.92676
BIRC2	4	0.016183	0.048067	0.602339	1490	3	-0.77709	0.87016	0.87011	1	15299	0	-0.77709
SLC26A5	4	0.016196	0.04809	0.602339	1491	3	-0.74633	0.91109	0.91109	1	16076	0	-0.74633
SLC1A5	4	0.016199	0.048097	0.602339	1492	2	-0.46979	0.19624	0.33485	0.970645	6403	2	-0.46979
ALG1	4	0.016211	0.048133	0.602339	1493	3	-0.80629	0.86041	0.86032	1	15118	0	-0.80629
OR1N1	4	0.016215	0.048138	0.602339	1494	2	-0.74335	0.63684	0.68359	1	12067	1	-0.74335
COA7	4	0.016215	0.048139	0.602339	1495	3	-0.81378	0.82996	0.83001	1	14583	0	-0.81378
FNBP4	4	0.016219	0.048145	0.602339	1496	3	-0.85863	0.98304	0.98307	1	17620	0	-0.85863
BLOC1S2	4	0.016264	0.048259	0.60337	1497	3	-0.64207	0.97813	0.97831	1	17465	0	-0.64207
SLC5A11	4	0.016291	0.048325	0.603786	1498	3	-0.72527	0.90282	0.90287	1	15903	0	-0.72527
EIF3M	4	0.016373	0.048502	0.605592	1499	2	-0.37813	0.39224	0.53731	1	9688	2	-0.37813
BEST4	4	0.016397	0.04855	0.605795	1500	3	-0.60165	0.98873	0.98875	1	17796	0	-0.60165
C20orf194	4	0.016436	0.048637	0.606128	1501	3	-0.60376	0.51705	0.62085	1	11019	1	-0.60376
TRMT112	4	0.016439	0.048642	0.606128	1502	3	-0.81479	0.97861	0.97877	1	17483	0	-0.81479
AMPD2	4	0.016462	0.048694	0.606383	1503	3	-0.72197	0.22389	0.36364	0.988684	6838	1	-0.72197
ALDH3A2	4	0.016546	0.048882	0.60832	1504	3	-0.75442	0.96116	0.96117	1	17076	0	-0.75442
CENPT	4	0.01657	0.048933	0.608546	1505	3	-0.57998	0.83479	0.83483	1	14653	0	-0.57998
CRLF1	4	0.016603	0.049004	0.609022	1506	3	-0.68342	0.96077	0.96082	1	17064	0	-0.68342
MPP3	4	0.016635	0.049078	0.609537	1507	2	-0.69834	0.79441	0.79602	1	14010	1	-0.69834
TSGA10IP	4	0.016659	0.049122	0.609691	1508	2	-0.79654	0.96693	0.967	1	17212	0	-0.79654
SCGN	4	0.016678	0.049161	0.609765	1509	2	-0.22973	0.10226	0.21879	0.909947	4408	1	-0.22973
ZMAT2	4	0.016707	0.049223	0.610135	1510	3	-1.0183	0.77879	0.78223	1	13774	1	-1.0183
LRTM1	4	0.01673	0.049275	0.610372	1511	3	-0.59332	0.96705	0.96712	1	17215	0	-0.59332
PELP1	4	0.016787	0.049395	0.61146	1512	3	-1.0172	0.6254	0.67702	1	11957	1	-1.0172
PNPT1	4	0.016869	0.049564	0.613146	1513	3	-0.70586	0.19963	0.3384	0.971389	6471	1	-0.70586
RGS3	4	0.016899	0.049625	0.613493	1514	2	-0.71352	0.48727	0.60723	1	10777	1	-0.71352
SOCS3	4	0.016947	0.049745	0.614288	1515	3	-0.97666	0.38975	0.53477	1	9646	1	-0.97666
PFDN1	4	0.016951	0.049755	0.614288	1516	3	-0.75803	0.86534	0.86532	1	15214	0	-0.75803
PDAP1	4	0.016995	0.049857	0.614789	1517	2	-0.60623	0.43128	0.57777	1	10317	1	-0.60623
HSD17B3	4	0.016998	0.049861	0.614789	1518	3	-0.61721	0.73278	0.74602	1	13181	1	-0.61721
CCDC88A	4	0.017035	0.049956	0.615379	1519	2	-0.32058	0.11365	0.23909	0.916346	4794	2	-0.32058
FAM3D	4	0.017043	0.049975	0.615379	1520	2	-0.73402	0.8736	0.8736	1	15357	0	-0.73402
FA2H	4	0.017154	0.050207	0.617834	1521	3	-0.55046	0.79159	0.79346	1	13966	1	-0.55046
TLR4	4	0.017189	0.050292	0.618317	1522	2	-0.5668	0.51885	0.62168	1	11035	1	-0.5668
TRPV3	4	0.017213	0.050346	0.618317	1523	2	-0.39947	0.36396	0.50815	1	9203	2	-0.39947
MTOR	4	0.017229	0.050375	0.618317	1524	3	-1.141	0.8875	0.88751	1	15592	0	-1.141
KLHDC7B	4	0.017278	0.050488	0.618317	1525	2	-0.58489	0.62787	0.6784	1	11984	1	-0.58489
HINT3	4	0.017279	0.050492	0.618317	1526	3	-0.54181	0.91147	0.91148	1	16083	0	-0.54181
DDX4	4	0.017283	0.050502	0.618317	1527	3	-0.59479	0.92877	0.92893	1	16409	0	-0.59479
CCDC172	4	0.017286	0.050508	0.618317	1528	2	-0.54952	0.21435	0.35374	0.983246	6683	2	-0.54952
AGO2	4	0.017287	0.05051	0.618317	1529	3	-0.65559	0.93348	0.93358	1	16507	0	-0.65559
PGLYRP3	4	0.017307	0.050558	0.618508	1530	3	-0.57306	0.989	0.98901	1	17805	0	-0.57306
EIF4G2	4	0.017366	0.050689	0.619699	1531	3	-0.94535	0.95915	0.95922	1	17028	0	-0.94535
EXOSC2	4	0.017537	0.051044	0.62363	1532	3	-0.66274	0.97563	0.97582	1	17408	0	-0.66274
ZG16B	4	0.017592	0.051164	0.624674	1533	3	-0.62889	0.9053	0.90534	1	15941	0	-0.62889
SERPINC1	4	0.017608	0.051196	0.624674	1534	3	-0.64948	0.048306	0.11756	0.848808	2509	1	-0.64948
NOP2	4	0.017718	0.051413	0.62692	1535	2	-0.60068	0.78687	0.78933	1	13895	1	-0.60068
SLC35B1	4	0.017792	0.051576	0.628494	1536	3	-0.76224	0.90844	0.90848	1	16013	0	-0.76224
POU2F1	4	0.01786	0.051715	0.629532	1537	3	-0.73944	0.080953	0.1801	0.893647	3670	1	-0.73944
DGCR8	4	0.017876	0.051747	0.629532	1538	3	-0.91599	0.90904	0.90907	1	16028	0	-0.91599
EMG1	4	0.017884	0.051762	0.629532	1539	3	-0.74686	0.9759	0.9761	1	17416	0	-0.74686
CNIH2	4	0.017916	0.051838	0.630054	1540	3	-0.73641	0.9769	0.9771	1	17438	0	-0.73641
NPEPPS	4	0.017948	0.051904	0.630441	1541	3	-0.6366	0.86235	0.86233	1	15157	0	-0.6366
HFE2	4	0.017993	0.051997	0.630692	1542	3	-0.77537	0.91956	0.91968	1	16242	0	-0.77537
MYOG	4	0.018001	0.052012	0.630692	1543	3	-0.67322	0.80544	0.80604	1	14160	1	-0.67322
BRD4	4	0.018017	0.052054	0.630692	1544	3	-0.67915	0.71813	0.73553	1	13001	1	-0.67915
OR1L8	4	0.01802	0.052059	0.630692	1545	2	-0.06899	0.60268	0.66426	1	11730	1	-0.06899
OLFML3	4	0.018056	0.052143	0.631308	1546	3	-0.64824	0.98622	0.98621	1	17710	0	-0.64824
HMGCS2	4	0.018106	0.052254	0.632242	1547	3	-0.73298	0.77901	0.78243	1	13779	1	-0.73298
JUNB	4	0.018134	0.052316	0.632588	1548	3	-1.0252	0.90599	0.90604	1	15959	0	-1.0252
KRT36	4	0.018187	0.052439	0.63366	1549	3	-0.57119	0.96979	0.96984	1	17280	0	-0.57119
MCOLN2	4	0.018255	0.052585	0.63475	1550	3	-0.86957	0.98186	0.98192	1	17585	0	-0.86957
HSPD1	4	0.01826	0.052597	0.63475	1551	3	-1.0557	0.9627	0.96273	1	17107	0	-1.0557
DHX58	4	0.018297	0.05268	0.635347	1552	3	-0.68473	0.10652	0.22636	0.914527	4544	1	-0.68473
NUP214	4	0.018355	0.052804	0.636088	1553	3	-0.85358	0.97145	0.97158	1	17318	0	-0.85358
UHRF1	4	0.01837	0.052839	0.636088	1554	3	-0.89692	0.81258	0.81279	1	14296	1	-0.89692
RTFDC1	4	0.018372	0.052843	0.636088	1555	2	-0.54927	0.62968	0.67947	1	12001	1	-0.54927
RPL13	4	0.018428	0.052981	0.637337	1556	3	-0.73066	0.8961	0.89609	1	15767	0	-0.73066
TPPP	4	0.018493	0.05313	0.638712	1557	3	-0.79275	0.88266	0.88271	1	15511	0	-0.79275
PPP2R5D	4	0.018518	0.053182	0.638931	1558	3	-0.72765	0.98548	0.98548	1	17683	0	-0.72765
SEC61G	4	0.018547	0.053249	0.639327	1559	3	-1.0782	0.97048	0.97055	1	17293	0	-1.0782
LEXM	4	0.018699	0.053561	0.642588	1560	3	-0.82594	0.81905	0.8191	1	14405	1	-0.82594
PIK3C3	4	0.018741	0.053643	0.642588	1561	3	-0.76775	0.98729	0.98727	1	17741	0	-0.76775
HIST1H4F	4	0.018757	0.053676	0.642588	1562	3	-0.94697	0.89055	0.89055	1	15662	0	-0.94697
GCDH	4	0.018761	0.053684	0.642588	1563	3	-0.84925	0.79082	0.79277	1	13950	1	-0.84925
FOXQ1	4	0.018765	0.053692	0.642588	1564	3	-0.63601	0.69836	0.72194	1	12754	1	-0.63601
COMMD5	4	0.018815	0.053796	0.643429	1565	3	-0.59993	0.8079	0.80832	1	14206	1	-0.59993
ZNF366	4	0.018844	0.053855	0.643719	1566	3	-0.75234	0.88765	0.88766	1	15596	0	-0.75234
NTHL1	4	0.018873	0.053916	0.644034	1567	3	-0.69958	0.87034	0.8703	1	15301	0	-0.69958
ANAPC10	4	0.018892	0.053961	0.64416	1568	2	-0.96908	0.97863	0.97879	1	17484	0	-0.96908
FBP1	4	0.018957	0.054106	0.645482	1569	3	-0.71793	0.44505	0.58867	1	10483	1	-0.71793
NELFCD	4	0.018986	0.05416	0.64572	1570	3	-0.56123	0.9839	0.9839	1	17641	0	-0.56123
NOP9	4	0.019057	0.054332	0.647088	1571	3	-0.81399	0.98502	0.98502	1	17672	0	-0.81399
ELP3	4	0.019061	0.054344	0.647088	1572	3	-0.84448	0.98593	0.98592	1	17700	0	-0.84448
C11orf91	4	0.019166	0.054569	0.649354	1573	3	-0.77887	0.7906	0.79257	1	13947	1	-0.77887
LRRC73	4	0.019283	0.054843	0.6522	1574	2	-0.64987	0.95155	0.95163	1	16858	0	-0.64987
GRIK5	4	0.019301	0.054889	0.652333	1575	3	-0.67953	0.87531	0.87535	1	15384	0	-0.67953
RBM19	4	0.019385	0.055091	0.654067	1576	3	-0.82022	0.98302	0.98306	1	17619	0	-0.82022
TMEM30A	4	0.019402	0.055128	0.654067	1577	3	-0.72897	0.85043	0.85037	1	14944	0	-0.72897
RALGPS1	4	0.019432	0.055184	0.654067	1578	3	-0.68464	0.95238	0.95246	1	16880	0	-0.68464
OVGP1	4	0.019437	0.055199	0.654067	1579	3	-0.60783	0.78843	0.79068	1	13923	1	-0.60783
PCDHA2	4	0.019454	0.055233	0.654067	1580	2	-0.72855	0.13228	0.26828	0.932123	5304	1	-0.72855
AHCTF1	4	0.019479	0.055287	0.654067	1581	3	-0.81858	0.035345	0.091751	0.823156	2015	1	-0.81858
RCOR1	4	0.019499	0.055326	0.654067	1582	3	-0.85865	0.84199	0.84191	1	14786	0	-0.85865
NSMCE4A	4	0.019505	0.055337	0.654067	1583	3	-0.74819	0.8189	0.81895	1	14398	1	-0.74819
FAM234A	4	0.019512	0.055348	0.654067	1584	3	-0.69666	0.7275	0.74224	1	13117	1	-0.69666
CTR9	4	0.019582	0.055495	0.6553	1585	2	-0.65424	0.96897	0.96903	1	17260	0	-0.65424
SH2B3	4	0.019597	0.055523	0.6553	1586	3	-0.66131	0.74909	0.7583	1	13385	1	-0.66131
MAEA	4	0.019661	0.055664	0.656304	1587	3	-0.61869	0.73913	0.75065	1	13258	1	-0.61869
GPR61	4	0.019677	0.055698	0.656304	1588	2	-0.29695	0.23921	0.37938	0.994912	7093	2	-0.29695
ARHGAP1	4	0.019687	0.055713	0.656304	1589	3	-0.6588	0.91303	0.91305	1	16116	0	-0.6588
ASB6	4	0.019712	0.055778	0.656657	1590	3	-0.71558	0.97607	0.97628	1	17423	0	-0.71558
KMO	4	0.019729	0.055824	0.65674	1591	2	-0.53678	0.31343	0.456	1	8336	1	-0.53678
SSH1	4	0.019746	0.055855	0.65674	1592	3	-0.6614	0.97093	0.97103	1	17306	0	-0.6614
EVI5L	4	0.019832	0.056053	0.658655	1593	3	-0.63365	0.75287	0.76131	1	13434	1	-0.63365
PKM	4	0.019884	0.056186	0.659726	1594	3	-0.61004	0.98571	0.9857	1	17692	0	-0.61004
MTMR3	4	0.019897	0.056214	0.659726	1595	2	-0.0046356	0.31071	0.45315	1	8284	2	-0.0046356
FOXA3	4	0.019987	0.056417	0.661691	1596	3	-0.74477	0.38187	0.52662	1	9506	1	-0.74477
GOLGA2	4	0.020047	0.056547	0.662652	1597	3	-0.89165	0.85577	0.85573	1	15033	0	-0.89165
ATRIP	4	0.020058	0.05657	0.662652	1598	2	-0.38214	0.31076	0.45319	1	8286	1	-0.38214
IGFL3	4	0.020117	0.056698	0.663746	1599	3	-0.6705	0.66549	0.70081	1	12386	1	-0.6705
MSS51	4	0.020151	0.056771	0.664185	1600	3	-0.84678	0.69992	0.72302	1	12773	1	-0.84678
SRP14	4	0.020181	0.056838	0.664548	1601	3	-0.7989	0.10527	0.22415	0.912254	4508	1	-0.7989
PNKD	4	0.020229	0.056947	0.664951	1602	3	-0.8839	0.9881	0.98811	1	17769	0	-0.8839
EIF3J	4	0.020264	0.057009	0.664951	1603	3	-0.59627	0.90095	0.90094	1	15867	0	-0.59627
FRRS1	4	0.020277	0.057034	0.664951	1604	3	-0.82732	0.96387	0.96394	1	17136	0	-0.82732
LDHC	4	0.020281	0.057045	0.664951	1605	3	-1.0367	0.96411	0.96417	1	17145	0	-1.0367
RPIA	4	0.020283	0.057049	0.664951	1606	2	-0.74268	0.31561	0.45823	1	8379	1	-0.74268
MED17	4	0.020406	0.057304	0.667502	1607	3	-0.88523	0.73664	0.74877	1	13230	1	-0.88523
KIF15	4	0.020433	0.057363	0.66777	1608	1	-0.032353	0.74347	0.75399	1	13313	1	-0.032353
DENND2D	4	0.020486	0.057486	0.668197	1609	3	-0.80028	0.69944	0.72269	1	12768	1	-0.80028
MOB4	4	0.020491	0.057498	0.668197	1610	3	-0.66173	0.85276	0.85268	1	14985	0	-0.66173
NDST1	4	0.020493	0.057506	0.668197	1611	3	-0.70997	0.54462	0.63402	1	11243	1	-0.70997
CSTF1	4	0.020579	0.057692	0.669913	1612	3	-0.69115	0.89296	0.89291	1	15708	0	-0.69115
MAP4K2	4	0.020592	0.057725	0.669913	1613	3	-0.52315	0.75272	0.7612	1	13430	1	-0.52315
CHMP3	4	0.020622	0.057793	0.670288	1614	3	-0.61705	0.68029	0.71018	1	12538	1	-0.61705
GPT	4	0.020688	0.057929	0.671441	1615	3	-0.62676	0.59985	0.66268	1	11706	1	-0.62676
ZNF408	4	0.020741	0.058044	0.672311	1616	3	-0.54487	0.98601	0.98602	1	17703	0	-0.54487
HNRNPH2	4	0.020755	0.058075	0.672311	1617	3	-0.67432	0.72977	0.74383	1	13142	1	-0.67432
ZCCHC14	4	0.020799	0.058162	0.672898	1618	3	-0.57927	0.15428	0.29125	0.950429	5659	1	-0.57927
FEN1	4	0.020843	0.058259	0.673606	1619	3	-0.79425	0.9005	0.90049	1	15856	0	-0.79425
HJURP	4	0.020883	0.058339	0.674112	1620	3	-0.94533	0.96278	0.96282	1	17112	0	-0.94533
UBE2J2	4	0.020934	0.058441	0.674539	1621	2	-0.38813	0.26363	0.40467	1	7507	2	-0.38813
ROMO1	4	0.020952	0.058487	0.674539	1622	2	-0.79249	0.46093	0.5956	1	10586	1	-0.79249
DDN	4	0.020976	0.058535	0.674539	1623	3	-0.69847	0.91835	0.91841	1	16217	0	-0.69847
CASTOR1	4	0.020978	0.05854	0.674539	1624	2	-0.58183	0.91708	0.91716	1	16189	0	-0.58183
ZRANB2	4	0.020994	0.058579	0.674539	1625	3	-0.71725	0.97852	0.97868	1	17479	0	-0.71725
LSM2	4	0.021022	0.058634	0.674539	1626	3	-0.46654	0.73395	0.74683	1	13197	1	-0.46654
RPTOR	4	0.021022	0.058635	0.674539	1627	3	-0.70133	0.9707	0.97079	1	17300	0	-0.70133
COX7C	4	0.021038	0.058663	0.674539	1628	3	-0.78913	0.95235	0.95244	1	16879	0	-0.78913
SMPDL3B	4	0.021056	0.058703	0.674581	1629	3	-0.95823	0.91588	0.91597	1	16169	0	-0.95823
LOC730098	4	0.021181	0.058982	0.677375	1630	3	-0.69686	0.49741	0.61182	1	10855	1	-0.69686
TXN2	4	0.021235	0.059086	0.677416	1631	3	-0.66925	0.76201	0.76845	1	13533	1	-0.66925
FAU	4	0.021236	0.059089	0.677416	1632	2	-0.23429	0.16139	0.29873	0.95519	5788	2	-0.23429
MINDY1	4	0.021239	0.059094	0.677416	1633	3	-0.78155	0.90839	0.90842	1	16010	0	-0.78155
ZBTB8OS	4	0.021261	0.059145	0.677583	1634	3	-0.84838	0.4332	0.57979	1	10349	1	-0.84838
NUFIP1	4	0.021279	0.05919	0.677683	1635	3	-0.79368	0.98347	0.98348	1	17628	0	-0.79368
VPS37C	4	0.021324	0.059275	0.678064	1636	3	-0.71389	0.9873	0.98727	1	17742	0	-0.71389
ALDH7A1	4	0.021347	0.059321	0.678064	1637	3	-0.7087	0.19192	0.33048	0.968789	6323	1	-0.7087
SNRPB2	4	0.02136	0.059347	0.678064	1638	3	-0.77548	0.82857	0.82858	1	14557	0	-0.77548
MYBBP1A	4	0.02137	0.059368	0.678064	1639	2	-0.55703	0.51834	0.62145	1	11028	1	-0.55703
ATP6V1E2	4	0.021423	0.059469	0.678802	1640	3	-0.74275	0.31765	0.46035	1	8415	1	-0.74275
MRPL2	4	0.021613	0.059893	0.681987	1641	3	-0.78547	0.98765	0.98765	1	17757	0	-0.78547
NADK2	4	0.021635	0.059942	0.682132	1642	3	-0.82718	0.96157	0.96159	1	17084	0	-0.82718
SEC31B	4	0.021663	0.060008	0.682283	1643	3	-0.77208	0.9718	0.97193	1	17326	0	-0.77208
DNLZ	4	0.021672	0.060028	0.682283	1644	3	-0.6938	0.98349	0.98349	1	17630	0	-0.6938
SLC25A10	4	0.02174	0.060176	0.683309	1645	3	-0.59565	0.57326	0.64841	1	11491	1	-0.59565
HES3	4	0.021746	0.060191	0.683309	1646	3	-0.76562	0.98555	0.98554	1	17686	0	-0.76562
APBA1	4	0.021767	0.060233	0.683375	1647	3	-0.61252	0.11181	0.23581	0.916346	4717	1	-0.61252
NOC2L	4	0.021812	0.060332	0.683727	1648	3	-0.76777	0.9457	0.94573	1	16740	0	-0.76777
HAO2	4	0.021831	0.060367	0.683727	1649	3	-0.69716	0.9883	0.98832	1	17779	0	-0.69716
TADA2A	4	0.021835	0.060374	0.683727	1650	3	-0.70082	0.94743	0.94752	1	16773	0	-0.70082
NOL8	4	0.021904	0.060518	0.68494	1651	3	-0.98286	0.97595	0.97614	1	17417	0	-0.98286
C1QTNF8	4	0.021954	0.060629	0.68572	1652	3	-0.83012	0.83571	0.83572	1	14669	0	-0.83012
YIF1A	4	0.021968	0.06066	0.68572	1653	3	-0.58457	0.97274	0.9729	1	17345	0	-0.58457
KIF23	4	0.022045	0.060817	0.687084	1654	3	-1.1272	0.98433	0.98434	1	17653	0	-1.1272
NIP7	4	0.022253	0.061273	0.691821	1655	3	-0.87074	0.33075	0.47386	1	8642	1	-0.87074
IER3	4	0.022303	0.061376	0.692572	1656	3	-0.56941	0.77998	0.78327	1	13789	1	-0.56941
NDUFS7	4	0.022335	0.061455	0.693037	1657	2	-0.55647	0.70947	0.72939	1	12885	1	-0.55647
COX20	4	0.022368	0.061529	0.693132	1658	3	-0.96601	0.98206	0.98212	1	17592	0	-0.96601
NFE2L1	4	0.022372	0.061537	0.693132	1659	3	-0.84567	0.39335	0.53853	1	9707	1	-0.84567
PLK2	4	0.022391	0.061576	0.693155	1660	3	-0.51496	0.48694	0.60708	1	10774	1	-0.51496
ALDOB	4	0.022446	0.061684	0.693957	1661	3	-0.6525	0.58582	0.6551	1	11583	1	-0.6525
GTSE1	4	0.022619	0.062051	0.697661	1662	3	-0.7325	0.98907	0.98908	1	17807	0	-0.7325
ALAS1	4	0.02267	0.062159	0.698459	1663	3	-0.52928	0.93141	0.93153	1	16470	0	-0.52928
DUSP2	4	0.022697	0.062219	0.698716	1664	3	-0.73213	0.13702	0.27325	0.935864	5383	1	-0.73213
PRDM10	4	0.022734	0.062309	0.699306	1665	3	-0.81292	0.95559	0.95565	1	16945	0	-0.81292
HEMGN	4	0.022867	0.062573	0.701683	1666	3	-0.98121	0.70956	0.72945	1	12886	1	-0.98121
METAP2	4	0.022876	0.062595	0.701683	1667	3	-1.1315	0.96722	0.96727	1	17217	0	-1.1315
WNT1	4	0.022979	0.062807	0.703635	1668	3	-0.79451	0.95637	0.95644	1	16967	0	-0.79451
JAK1	4	0.022993	0.062845	0.703635	1669	3	-0.81093	0.61977	0.6738	1	11898	1	-0.81093
NYNRIN	4	0.023054	0.062977	0.704692	1670	3	-0.7103	0.13321	0.26926	0.932357	5322	1	-0.7103
KTI12	4	0.023177	0.06324	0.707212	1671	3	-0.90419	0.83369	0.8337	1	14640	0	-0.90419
DENR	4	0.02333	0.063577	0.710197	1672	2	-0.69013	0.65364	0.69362	1	12256	1	-0.69013
ELF2	4	0.023333	0.063582	0.710197	1673	3	-0.64567	0.97984	0.97996	1	17522	0	-0.64567
RASIP1	4	0.023366	0.063665	0.710395	1674	3	-0.75121	0.45142	0.5914	1	10528	1	-0.75121
CHMP1A	4	0.023371	0.063676	0.710395	1675	3	-0.96689	0.98745	0.98745	1	17747	0	-0.96689
KHSRP	4	0.023395	0.063723	0.710502	1676	2	-0.48134	0.43173	0.57823	1	10323	2	-0.48134
RNMT	4	0.023452	0.06384	0.71138	1677	3	-0.61787	0.98413	0.98413	1	17649	0	-0.61787
XPNPEP1	4	0.023471	0.063888	0.711498	1678	3	-0.78262	0.67269	0.70531	1	12457	1	-0.78262
KCMF1	4	0.023547	0.064048	0.712851	1679	3	-0.62164	0.90051	0.9005	1	15857	0	-0.62164
PSMG4	4	0.023589	0.064137	0.713414	1680	3	-0.82546	0.98288	0.98293	1	17615	0	-0.82546
TPH2	4	0.023693	0.064373	0.715615	1681	2	-0.69107	0.8473	0.84724	1	14876	0	-0.69107
RFT1	4	0.023749	0.064489	0.716038	1682	2	-0.13607	0.64006	0.68548	1	12103	1	-0.13607
MAD1L1	4	0.02375	0.06449	0.716038	1683	3	-0.79238	0.96155	0.96157	1	17083	0	-0.79238
UCHL5	4	0.023787	0.064567	0.716038	1684	3	-0.54718	0.96559	0.96565	1	17178	0	-0.54718
NFE2L2	4	0.023806	0.064608	0.716038	1685	2	-0.70997	0.92776	0.92793	1	16396	0	-0.70997
USP38	4	0.023806	0.064609	0.716038	1686	3	-0.88494	0.92742	0.92758	1	16389	0	-0.88494
C1orf123	4	0.02383	0.064656	0.716038	1687	3	-0.5744	0.69046	0.71676	1	12648	1	-0.5744
PPP6R2	4	0.023856	0.064713	0.716038	1688	1	0.17194	0.40984	0.55557	1	9989	2	0.17194
CNTN2	4	0.023869	0.064742	0.716038	1689	3	-0.65445	0.85325	0.85321	1	14991	0	-0.65445
ISLR2	4	0.024018	0.065054	0.71893	1690	3	-0.69548	0.98753	0.98753	1	17751	0	-0.69548
PSKH1	4	0.0241	0.065238	0.720536	1691	3	-0.59751	0.77674	0.78053	1	13748	1	-0.59751
COX4I2	4	0.024168	0.065379	0.720862	1692	3	-0.544	0.45194	0.59164	1	10533	1	-0.544
SNRPA	4	0.024178	0.065397	0.720862	1693	3	-1.1006	0.75358	0.76186	1	13440	1	-1.1006
ATP6AP2	4	0.024201	0.065442	0.720862	1694	3	-0.69773	0.87568	0.87573	1	15387	0	-0.69773
CHST13	4	0.02422	0.065487	0.720862	1695	2	-0.65393	0.22231	0.36197	0.988684	6807	1	-0.65393
PPP6R3	4	0.024222	0.065492	0.720862	1696	3	-0.60482	0.91705	0.91712	1	16188	0	-0.60482
MAML2	4	0.024236	0.065524	0.720862	1697	3	-0.60015	0.97319	0.97335	1	17353	0	-0.60015
SLC6A12	4	0.024246	0.065547	0.720862	1698	3	-0.58882	0.6219	0.67497	1	11920	1	-0.58882
ASB4	4	0.024258	0.065578	0.720862	1699	2	-0.69484	0.68379	0.71247	1	12579	1	-0.69484
DDX3X	4	0.024284	0.065626	0.720862	1700	1	-0.056871	0.94833	0.94839	1	16788	0	-0.056871
WDR54	4	0.024299	0.065652	0.720862	1701	3	-0.69408	0.98842	0.98845	1	17785	0	-0.69408
GINS3	4	0.024343	0.065738	0.721391	1702	3	-0.76836	0.93622	0.93625	1	16552	0	-0.76836
MRPL57	4	0.02441	0.065882	0.722295	1703	2	-0.65229	0.97128	0.97139	1	17314	0	-0.65229
CIDEA	4	0.024446	0.065952	0.722295	1704	3	-0.78221	0.72826	0.74275	1	13128	1	-0.78221
BNIP1	4	0.024451	0.065963	0.722295	1705	3	-0.92064	0.64683	0.68957	1	12181	1	-0.92064
ADCY5	4	0.024457	0.065975	0.722295	1706	2	-0.69919	0.97565	0.97584	1	17411	0	-0.69919
GPR137C	4	0.024497	0.06604	0.722585	1707	1	-0.076895	0.91488	0.91496	1	16151	0	-0.076895
INPP5D	4	0.024539	0.066129	0.722758	1708	3	-0.67628	0.3499	0.49367	1	8968	1	-0.67628
HEATR6	4	0.024549	0.066152	0.722758	1709	3	-0.6784	0.81651	0.8166	1	14355	1	-0.6784
FH	4	0.024558	0.066171	0.722758	1710	3	-0.61044	0.97197	0.97212	1	17330	0	-0.61044
SP140L	4	0.024588	0.066236	0.723029	1711	3	-0.57609	0.70701	0.72776	1	12864	1	-0.57609
SCYL1	4	0.024609	0.066273	0.723029	1712	2	-0.8779	0.95574	0.95581	1	16950	0	-0.8779
RNF8	4	0.024724	0.066521	0.724996	1713	2	-0.60459	0.83244	0.83246	1	14620	0	-0.60459
CSTF3	4	0.02473	0.066531	0.724996	1714	3	-0.68955	0.49282	0.60975	1	10828	1	-0.68955
HMBS	4	0.024752	0.066578	0.725087	1715	2	-0.47084	0.92092	0.92104	1	16264	0	-0.47084
GTPBP8	4	0.0248	0.066676	0.725624	1716	2	-0.64431	0.60675	0.66647	1	11767	1	-0.64431
MAP3K7	4	0.024814	0.066704	0.725624	1717	3	-0.84736	0.98671	0.98667	1	17724	0	-0.84736
WDR92	4	0.024871	0.066831	0.726575	1718	3	-0.77055	0.96836	0.96844	1	17241	0	-0.77055
NUDT13	4	0.024997	0.067105	0.728818	1719	3	-0.60739	0.47231	0.60054	1	10677	1	-0.60739
GLYCTK	4	0.025002	0.067115	0.728818	1720	3	-0.58714	0.45035	0.59095	1	10517	1	-0.58714
BRD8	4	0.025086	0.067296	0.730361	1721	3	-0.77204	0.9399	0.93998	1	16627	0	-0.77204
UNC119	4	0.025156	0.06744	0.731508	1722	3	-0.68649	0.75762	0.765	1	13487	1	-0.68649
SLC2A6	4	0.025186	0.067504	0.731744	1723	3	-0.62207	0.97392	0.97408	1	17365	0	-0.62207
SLIT1	4	0.025203	0.06754	0.731744	1724	2	-0.57036	0.80648	0.80701	1	14175	1	-0.57036
TTBK1	4	0.025286	0.067713	0.733191	1725	3	-0.6998	0.10337	0.22075	0.909947	4447	1	-0.6998
DLG2	4	0.025318	0.067798	0.73347	1726	2	-0.3941	0.083861	0.18553	0.893753	3792	2	-0.3941
NDOR1	4	0.025328	0.067817	0.73347	1727	2	-0.72841	0.88564	0.88566	1	15565	0	-0.72841
BCL7C	4	0.025355	0.067882	0.733749	1728	3	-0.55443	0.97239	0.97256	1	17338	0	-0.55443
DCAF7	4	0.025434	0.068038	0.735014	1729	2	-0.034888	0.036854	0.094781	0.824712	2075	2	-0.034888
PTGER4	4	0.025463	0.0681	0.735264	1730	2	-0.29088	0.34574	0.48937	1	8889	2	-0.29088
PYCARD	4	0.025551	0.068285	0.736835	1731	3	-0.61598	0.9406	0.94066	1	16643	0	-0.61598
MRPL42	4	0.025601	0.068384	0.737476	1732	3	-0.59928	0.54922	0.63626	1	11273	1	-0.59928
NTRK1	4	0.025638	0.068457	0.737791	1733	3	-0.88181	0.65501	0.69443	1	12273	1	-0.88181
LCE1A	4	0.025657	0.068502	0.737791	1734	2	-0.53258	0.26536	0.40644	1	7538	1	-0.53258
NDUFB2	4	0.025672	0.068531	0.737791	1735	3	-0.80188	0.98681	0.98677	1	17727	0	-0.80188
DNAJC17	4	0.025705	0.068594	0.738044	1736	2	-0.54378	0.098746	0.21259	0.904998	4303	1	-0.54378
IMMT	4	0.025727	0.068639	0.738109	1737	3	-0.65854	0.96509	0.96515	1	17167	0	-0.65854
PIP4K2B	4	0.025773	0.06873	0.738327	1738	3	-0.55347	0.72489	0.74037	1	13085	1	-0.55347
DTL	4	0.025788	0.06876	0.738327	1739	3	-1.176	0.96783	0.96791	1	17228	0	-1.176
DACT3	4	0.025793	0.068778	0.738327	1740	2	-0.93411	0.91014	0.91016	1	16057	0	-0.93411
DMPK	4	0.025828	0.068861	0.738597	1741	3	-0.6127	0.040313	0.10172	0.837324	2202	1	-0.6127
WDR72	4	0.025842	0.068882	0.738597	1742	2	-0.34621	0.39381	0.53899	1	9717	2	-0.34621
FAM109B	4	0.025874	0.068944	0.738849	1743	3	-0.58489	0.96028	0.96035	1	17052	0	-0.58489
POLR1E	4	0.02591	0.069026	0.739297	1744	3	-0.87817	0.96814	0.96821	1	17238	0	-0.87817
SPEM1	4	0.025945	0.069091	0.739576	1745	3	-0.51795	0.83488	0.83492	1	14655	0	-0.51795
MRPS21	4	0.025995	0.0692	0.740318	1746	3	-0.57881	0.36365	0.50784	1	9196	1	-0.57881
ATOH8	4	0.026027	0.069262	0.740556	1747	2	-0.48994	0.38893	0.53391	1	9631	2	-0.48994
FIBCD1	4	0.026097	0.069411	0.741331	1748	3	-0.62852	0.96903	0.96909	1	17262	0	-0.62852
PDRG1	4	0.026098	0.069413	0.741331	1749	1	0.12558	0.79061	0.79259	1	13948	1	0.12558
CELF3	4	0.026193	0.069638	0.743304	1750	2	-0.32826	0.78613	0.78869	1	13883	1	-0.32826
TRA2B	4	0.026306	0.069882	0.744985	1751	3	-0.52671	0.97889	0.97904	1	17494	0	-0.52671
FMO5	4	0.026311	0.069892	0.744985	1752	3	-0.87168	0.84562	0.84552	1	14846	0	-0.87168
FKBP5	4	0.026322	0.069914	0.744985	1753	3	-0.84549	0.84326	0.84316	1	14809	0	-0.84549
TRMT5	4	0.026379	0.070039	0.745889	1754	3	-0.75218	0.97811	0.97829	1	17464	0	-0.75218
ICK	4	0.026429	0.070145	0.746589	1755	3	-0.69292	0.83372	0.83372	1	14642	0	-0.69292
RPS23	4	0.026458	0.070197	0.746722	1756	2	-0.7105	0.77076	0.77559	1	13663	1	-0.7105
RHBDL2	4	0.026517	0.070303	0.747432	1757	3	-0.61108	0.94831	0.94837	1	16787	0	-0.61108
OR8K5	4	0.026547	0.070374	0.747755	1758	2	-0.38638	0.27186	0.41301	1	7644	2	-0.38638
LRRC10B	4	0.026586	0.070463	0.748279	1759	2	-0.6223	0.73752	0.74945	1	13241	1	-0.6223
CCDC6	4	0.026619	0.070537	0.748645	1760	3	-0.67398	0.9794	0.97954	1	17506	0	-0.67398
NDFIP2	4	0.026656	0.070635	0.749258	1761	3	-0.7226	0.46479	0.59721	1	10618	1	-0.7226
MRPL28	4	0.026687	0.070701	0.749534	1762	3	-0.71568	0.98232	0.98236	1	17600	0	-0.71568
GNB1L	4	0.026707	0.070746	0.749586	1763	3	-0.89886	0.9607	0.96075	1	17058	0	-0.89886
PMPCA	4	0.026791	0.070933	0.750525	1764	3	-0.69606	0.62702	0.6779	1	11976	1	-0.69606
USP53	4	0.026795	0.070939	0.750525	1765	3	-0.67429	0.77125	0.77599	1	13670	1	-0.67429
MIEF2	4	0.026805	0.070956	0.750525	1766	3	-0.73863	0.85385	0.8538	1	15003	0	-0.73863
DNAJC5	4	0.026826	0.070994	0.750525	1767	3	-0.72689	0.97605	0.97625	1	17422	0	-0.72689
SOWAHC	4	0.026914	0.07119	0.751999	1768	3	-0.73015	0.91	0.91002	1	16053	0	-0.73015
PLIN3	4	0.02694	0.071244	0.751999	1769	3	-0.75895	0.97955	0.97969	1	17512	0	-0.75895
TMEM170B	4	0.026945	0.071254	0.751999	1770	3	-0.51012	0.42218	0.56839	1	10173	1	-0.51012
GEMIN7	4	0.026977	0.071313	0.752194	1771	3	-0.75104	0.6209	0.67443	1	11908	1	-0.75104
CHST2	4	0.027001	0.071359	0.752261	1772	3	-0.74955	0.58376	0.65399	1	11572	1	-0.74955
C4orf26	4	0.027121	0.071603	0.754403	1773	3	-0.71158	0.96689	0.96696	1	17211	0	-0.71158
UQCRFS1	4	0.027165	0.071703	0.755035	1774	2	0.077631	0.0018212	0.0064633	0.581922	195	2	0.077631
AK5	4	0.027221	0.071836	0.755407	1775	3	-0.57444	0.96097	0.96099	1	17070	0	-0.57444
TTI1	4	0.027237	0.071867	0.755407	1776	3	-0.77648	0.91216	0.91218	1	16098	0	-0.77648
CYC1	4	0.027248	0.071887	0.755407	1777	3	-0.58993	0.96618	0.96626	1	17189	0	-0.58993
MYO5B	4	0.027253	0.071899	0.755407	1778	3	-0.60351	0.64897	0.69083	1	12204	1	-0.60351
MVD	4	0.02729	0.071979	0.755821	1779	3	-0.77366	0.82956	0.82958	1	14577	0	-0.77366
CUL1	4	0.027321	0.072035	0.75598	1780	3	-0.70746	0.61232	0.66959	1	11829	1	-0.70746
RGS7BP	4	0.02737	0.072131	0.756565	1781	3	-0.65875	0.46213	0.59612	1	10596	1	-0.65875
RAB40C	4	0.027426	0.072244	0.757332	1782	3	-0.62595	0.86698	0.8669	1	15244	0	-0.62595
DRC1	4	0.027489	0.072375	0.757853	1783	3	-0.64393	0.91635	0.91643	1	16179	0	-0.64393
ZC3H12A	4	0.027494	0.072386	0.757853	1784	3	-0.67479	0.88338	0.88343	1	15522	0	-0.67479
SDHA	4	0.027526	0.072448	0.757853	1785	3	-0.86568	0.86196	0.86191	1	15148	0	-0.86568
PALB2	4	0.027537	0.072477	0.757853	1786	1	0.43258	0.074833	0.16856	0.890439	3449	3	0.43258
LRRC38	4	0.027547	0.072496	0.757853	1787	3	-0.54032	0.57205	0.64778	1	11485	1	-0.54032
ZNF334	4	0.027641	0.072699	0.75916	1788	3	-0.62753	0.55668	0.64	1	11346	1	-0.62753
PROSER1	4	0.027644	0.072702	0.75916	1789	1	0.31923	0.0765	0.17173	0.891145	3513	3	0.31923
PTCD2	4	0.027673	0.072763	0.759371	1790	3	-0.66358	0.36439	0.5086	1	9212	1	-0.66358
SLC4A5	4	0.027689	0.072805	0.759389	1791	3	-0.73059	0.97821	0.97839	1	17469	0	-0.73059
CDSN	4	0.02771	0.07285	0.759435	1792	3	-0.52678	0.9853	0.9853	1	17680	0	-0.52678
DR1	4	0.027789	0.073034	0.760938	1793	3	-0.61783	0.87154	0.87153	1	15325	0	-0.61783
TSPAN18	4	0.027901	0.07326	0.762445	1794	3	-0.71214	0.98459	0.98459	1	17659	0	-0.71214
API5	4	0.027962	0.073384	0.763307	1795	2	-0.27064	0.060407	0.14115	0.872341	2943	2	-0.27064
TEAD1	4	0.028033	0.073534	0.763379	1796	3	-0.63577	0.97204	0.97219	1	17333	0	-0.63577
GART	4	0.028053	0.073569	0.763379	1797	3	-0.86237	0.056457	0.13361	0.862881	2818	1	-0.86237
OTUD4	4	0.02807	0.073603	0.763379	1798	1	0.4557	0.065226	0.15046	0.879979	3111	3	0.4557
CARM1	4	0.028071	0.073604	0.763379	1799	3	-0.67475	0.98568	0.98567	1	17690	0	-0.67475
BFSP2	4	0.028076	0.073617	0.763379	1800	3	-0.57941	0.78709	0.78951	1	13898	1	-0.57941
C2CD4D	4	0.028093	0.073659	0.763379	1801	2	-0.72781	0.80508	0.80569	1	14156	1	-0.72781
KBTBD4	4	0.028113	0.073696	0.763379	1802	3	-0.74172	0.70226	0.72456	1	12804	1	-0.74172
TRAM2	4	0.028123	0.073717	0.763379	1803	1	-0.03564	0.86867	0.86862	1	15270	0	-0.03564
PIWIL4	4	0.028193	0.073855	0.763974	1804	3	-0.71248	0.96412	0.96419	1	17146	0	-0.71248
MYO10	4	0.028284	0.074044	0.765501	1805	3	-0.48765	0.97092	0.97102	1	17305	0	-0.48765
ALG13	4	0.028311	0.074094	0.765597	1806	3	-0.64395	0.72604	0.74121	1	13095	1	-0.64395
MRPS18B	4	0.02837	0.074227	0.76655	1807	3	-0.95105	0.98359	0.98359	1	17632	0	-0.95105
OR4A15	4	0.02851	0.074503	0.768978	1808	3	-0.71026	0.18279	0.32097	0.965401	6164	1	-0.71026
MRPL4	4	0.028542	0.074572	0.769268	1809	3	-0.67545	0.98532	0.98532	1	17681	0	-0.67545
DDX20	4	0.028666	0.074838	0.771583	1810	3	-0.71919	0.84073	0.84063	1	14760	0	-0.71919
GSTA1	4	0.028753	0.075026	0.772677	1811	2	-0.33552	0.47045	0.59969	1	10658	1	-0.33552
AURKB	4	0.028825	0.075194	0.77374	1812	2	-0.71153	0.88416	0.88419	1	15539	0	-0.71153
KLHL42	4	0.028845	0.075235	0.77374	1813	2	-0.5884	0.52073	0.62259	1	11053	1	-0.5884
SPNS2	4	0.028855	0.075253	0.77374	1814	3	-0.68091	0.89322	0.89318	1	15712	0	-0.68091
PTPRS	4	0.028915	0.075371	0.774297	1815	3	-0.53771	0.77114	0.7759	1	13666	1	-0.53771
XXYLT1	4	0.028922	0.07539	0.774297	1816	1	0.10767	0.32901	0.47204	1	8618	2	0.10767
SECTM1	4	0.029018	0.075592	0.775949	1817	3	-0.4777	0.77928	0.78265	1	13782	1	-0.4777
SMIM10	4	0.029056	0.07567	0.77632	1818	3	-0.78729	0.22123	0.36084	0.987777	6790	1	-0.78729
TNNI1	4	0.029132	0.075852	0.777758	1819	2	-0.80142	0.96945	0.96952	1	17272	0	-0.80142
SNAP23	4	0.02923	0.076065	0.779524	1820	3	-0.82834	0.85138	0.85131	1	14962	0	-0.82834
NME3	4	0.029266	0.076132	0.77978	1821	3	-0.7972	0.88963	0.88962	1	15640	0	-0.7972
TAF4	4	0.029368	0.076344	0.781522	1822	2	-0.75872	0.96028	0.96034	1	17051	0	-0.75872
MTRF1L	4	0.029472	0.076568	0.782784	1823	3	-0.75247	0.98489	0.98489	1	17670	0	-0.75247
ANG	4	0.029477	0.07658	0.782784	1824	3	-0.56247	0.95762	0.95768	1	16995	0	-0.56247
NUP210L	4	0.029515	0.07665	0.782784	1825	3	-0.68733	0.96797	0.96805	1	17233	0	-0.68733
RIOK1	4	0.029526	0.076681	0.782784	1826	3	-0.91477	0.98686	0.98682	1	17732	0	-0.91477
DNHD1	4	0.029537	0.076707	0.782784	1827	3	-0.77673	0.93469	0.93478	1	16526	0	-0.77673
RAB3GAP2	4	0.029542	0.076717	0.782784	1828	3	-0.70326	0.89011	0.89011	1	15651	0	-0.70326
IL25	4	0.029565	0.07676	0.782795	1829	2	-0.70841	0.8679	0.86784	1	15262	0	-0.70841
TAF1D	4	0.029614	0.076872	0.78351	1830	2	-0.38806	0.85201	0.85192	1	14970	0	-0.38806
MFSD11	4	0.029636	0.076918	0.783552	1831	3	-0.73949	0.13395	0.27005	0.933365	5333	1	-0.73949
PLD1	4	0.029713	0.077081	0.784539	1832	3	-0.65154	0.97563	0.97582	1	17409	0	-0.65154
SLC18A1	4	0.02972	0.077099	0.784539	1833	2	-0.15351	0.79428	0.7959	1	14008	1	-0.15351
OR2A2	4	0.029773	0.077221	0.785347	1834	1	0.14731	0.31431	0.4569	1	8357	2	0.14731
DCTN6	4	0.02979	0.077262	0.785347	1835	3	-0.78254	0.47513	0.6018	1	10696	1	-0.78254
SUGP1	4	0.029813	0.077306	0.785372	1836	3	-0.54968	0.65687	0.69559	1	12296	1	-0.54968
ALG3	4	0.029884	0.077442	0.786054	1837	3	-0.56713	0.97096	0.97107	1	17309	0	-0.56713
NEMF	4	0.02989	0.077457	0.786054	1838	3	-0.52675	0.95404	0.95409	1	16912	0	-0.52675
BRF1	4	0.029986	0.077664	0.787728	1839	3	-0.50828	0.97887	0.97902	1	17492	0	-0.50828
SEMA4F	4	0.030052	0.077815	0.788839	1840	3	-0.89441	0.9551	0.95514	1	16932	0	-0.89441
FOXRED2	4	0.030083	0.077866	0.788926	1841	3	-0.6674	0.84238	0.84229	1	14791	0	-0.6674
OR7G3	4	0.030114	0.077937	0.78895	1842	2	-0.66011	0.93302	0.9331	1	16497	0	-0.66011
C22orf39	4	0.030129	0.077961	0.78895	1843	3	-0.65125	0.80434	0.80503	1	14145	1	-0.65125
RBM28	4	0.030146	0.078006	0.78895	1844	2	-0.7935	0.80546	0.80606	1	14161	1	-0.7935
EIF4A1	4	0.030162	0.078042	0.78895	1845	3	-0.6378	0.71221	0.73129	1	12925	1	-0.6378
EFNA3	4	0.030179	0.078079	0.78895	1846	3	-0.66194	0.76097	0.76762	1	13524	1	-0.66194
SCGB2B2	4	0.030207	0.078133	0.789075	1847	3	-0.7708	0.57225	0.64787	1	11488	1	-0.7708
CLIP4	4	0.030396	0.078551	0.792871	1848	2	-0.69986	0.98046	0.98056	1	17541	0	-0.69986
CAMKV	4	0.030447	0.078658	0.79352	1849	3	-0.55817	0.73893	0.7505	1	13254	1	-0.55817
TM2D3	4	0.030497	0.078755	0.793526	1850	3	-0.65999	0.5445	0.63396	1	11242	1	-0.65999
DUPD1	4	0.030517	0.078799	0.793526	1851	1	0.060273	0.25661	0.39731	1	7393	2	0.060273
RRP1	4	0.030533	0.078829	0.793526	1852	2	-0.83344	0.98799	0.98802	1	17766	0	-0.83344
LRFN1	4	0.030553	0.078869	0.793526	1853	3	-0.52337	0.50558	0.61553	1	10920	1	-0.52337
PNPLA8	4	0.03057	0.078903	0.793526	1854	3	-0.64962	0.92911	0.92925	1	16418	0	-0.64962
STAT3	4	0.030576	0.078913	0.793526	1855	3	-0.60246	0.98841	0.98843	1	17783	0	-0.60246
OR5K1	4	0.030621	0.079021	0.7938	1856	3	-0.51728	0.39861	0.54395	1	9791	1	-0.51728
ARL11	4	0.03066	0.079107	0.7938	1857	3	-0.78087	0.93531	0.93537	1	16535	0	-0.78087
PRSS27	4	0.030669	0.079128	0.7938	1858	2	-0.50359	0.76708	0.7726	1	13604	1	-0.50359
TWF2	4	0.030677	0.079145	0.7938	1859	3	-0.64662	0.76229	0.76868	1	13539	1	-0.64662
DPH3	4	0.03069	0.07918	0.7938	1860	2	-0.26951	0.27709	0.41842	1	7733	2	-0.26951
AMBN	4	0.030711	0.079219	0.7938	1861	3	-0.53074	0.98794	0.98796	1	17763	0	-0.53074
ANP32E	4	0.03073	0.079255	0.7938	1862	2	-0.24892	0.68184	0.71116	1	12553	1	-0.24892
C1orf198	4	0.030739	0.079278	0.7938	1863	3	-0.63419	0.09249	0.20142	0.902715	4087	1	-0.63419
CPSF3	4	0.030889	0.079576	0.796356	1864	1	-0.006006	0.62875	0.67894	1	11992	1	-0.006006
BRAP	4	0.030943	0.079712	0.797259	1865	2	-0.5853	0.5278	0.62592	1	11110	1	-0.5853
ZCCHC9	4	0.030959	0.079751	0.797259	1866	3	-0.65777	0.79388	0.79555	1	14001	1	-0.65777
POLQ	4	0.031089	0.080021	0.798525	1867	3	-0.45907	0.97969	0.97983	1	17519	0	-0.45907
CAMK2N1	4	0.031095	0.080033	0.798525	1868	3	-0.60268	0.57935	0.65164	1	11538	1	-0.60268
NFYB	4	0.031101	0.080047	0.798525	1869	2	-0.42486	0.051918	0.12472	0.8535	2646	2	-0.42486
MAPKAPK5	4	0.031112	0.080068	0.798525	1870	3	-0.55664	0.068172	0.15603	0.884016	3214	1	-0.55664
RNASE1	4	0.031123	0.080091	0.798525	1871	3	-0.59093	0.97874	0.9789	1	17489	0	-0.59093
EXOC1	4	0.031254	0.08036	0.800778	1872	3	-0.66476	0.27263	0.41383	1	7654	1	-0.66476
HIST2H3D	4	0.031322	0.080488	0.801484	1873	3	-0.60213	0.94871	0.94877	1	16794	0	-0.60213
PANK3	4	0.031334	0.080516	0.801484	1874	3	-0.7145	0.95113	0.95121	1	16844	0	-0.7145
HMOX2	4	0.031493	0.080833	0.804215	1875	3	-0.67967	0.98648	0.98645	1	17717	0	-0.67967
DCTN5	4	0.031527	0.080906	0.804513	1876	1	0.23999	0.16592	0.3035	0.958342	5864	2	0.23999
P2RY2	4	0.031591	0.081029	0.805304	1877	3	-0.65204	0.29992	0.442	1	8091	1	-0.65204
PHAX	4	0.031633	0.081104	0.805628	1878	2	-0.5422	0.48181	0.60477	1	10737	1	-0.5422
PRM3	4	0.031711	0.081261	0.805876	1879	3	-0.83781	0.32764	0.4706	1	8592	1	-0.83781
CSHL1	4	0.031717	0.081274	0.805876	1880	2	-0.478	0.2549	0.39551	0.999758	7367	1	-0.478
CCDC114	4	0.031723	0.081288	0.805876	1881	3	-0.71352	0.68743	0.71477	1	12613	1	-0.71352
KIF4B	4	0.031729	0.081301	0.805876	1882	3	-0.6424	0.89224	0.89221	1	15695	0	-0.6424
IST1	4	0.031832	0.081502	0.807438	1883	3	-0.45063	0.40009	0.54549	1	9816	1	-0.45063
NCAPG	4	0.03193	0.081696	0.807908	1884	3	-0.551	0.79087	0.79281	1	13951	1	-0.551
NELFE	4	0.031942	0.081714	0.807908	1885	3	-0.5789	0.98599	0.98599	1	17702	0	-0.5789
RHOA	4	0.031959	0.081757	0.807908	1886	3	-0.51617	0.96487	0.96493	1	17163	0	-0.51617
LOR	4	0.031962	0.081764	0.807908	1887	2	-0.58253	0.96857	0.96866	1	17248	0	-0.58253
FRMD4A	4	0.031976	0.081795	0.807908	1888	3	-0.51497	0.39686	0.54217	1	9764	1	-0.51497
SIGLECL1	4	0.031999	0.081838	0.807908	1889	3	-0.47259	0.703	0.72506	1	12818	1	-0.47259
GKN2	4	0.032005	0.081851	0.807908	1890	2	-0.44786	0.7954	0.79688	1	14027	1	-0.44786
NDUFB4	4	0.032026	0.0819	0.807967	1891	3	-0.74636	0.89024	0.89024	1	15654	0	-0.74636
A3GALT2	4	0.032074	0.082005	0.808578	1892	3	-0.68603	0.86755	0.86749	1	15255	0	-0.68603
ZBTB11	4	0.032133	0.082132	0.808944	1893	3	-0.96644	0.96841	0.96849	1	17243	0	-0.96644
CTHRC1	4	0.032138	0.082146	0.808944	1894	3	-0.5303	0.97683	0.97703	1	17436	0	-0.5303
C3	4	0.032155	0.082191	0.808944	1895	3	-0.58255	0.68747	0.7148	1	12615	1	-0.58255
GPR12	4	0.032164	0.082214	0.808944	1896	2	-0.37395	0.79702	0.79834	1	14051	1	-0.37395
RAB13	4	0.032225	0.08234	0.809605	1897	3	-0.73085	0.74099	0.7521	1	13282	1	-0.73085
ZDHHC6	4	0.032241	0.082378	0.809605	1898	2	-0.25538	0.024017	0.068379	0.783421	1585	2	-0.25538
RARS	4	0.03227	0.082437	0.809605	1899	2	-0.55017	0.72744	0.74219	1	13115	1	-0.55017
CLCN4	4	0.032277	0.082456	0.809605	1900	3	-0.70288	0.9463	0.94635	1	16753	0	-0.70288
GLRX5	4	0.032305	0.082525	0.809605	1901	2	-0.58246	0.95922	0.9593	1	17031	0	-0.58246
LRRC7	4	0.032312	0.082541	0.809605	1902	3	-0.56377	0.97692	0.97712	1	17439	0	-0.56377
KDM1A	4	0.032393	0.082702	0.810348	1903	3	-0.95766	0.83986	0.8398	1	14739	0	-0.95766
TMC3	4	0.032402	0.082723	0.810348	1904	2	-0.40462	0.56859	0.64603	1	11448	1	-0.40462
TRABD2A	4	0.032417	0.082746	0.810348	1905	3	-0.56269	0.95209	0.95218	1	16874	0	-0.56269
GBP1	4	0.03252	0.082966	0.812075	1906	3	-0.66249	0.87492	0.87495	1	15379	0	-0.66249
GAPDH	4	0.032564	0.083064	0.812374	1907	2	-0.24368	0.011312	0.037542	0.70131	976	2	-0.24368
PHF21A	4	0.032574	0.083083	0.812374	1908	3	-0.56655	0.9885	0.98852	1	17788	0	-0.56655
PYCR3	4	0.032644	0.083222	0.81325	1909	3	-0.78767	0.26786	0.40895	1	7577	1	-0.78767
C7orf61	4	0.032661	0.083259	0.81325	1910	2	-0.5368	0.92329	0.92346	1	16304	0	-0.5368
ABHD11	4	0.032761	0.083484	0.814562	1911	3	-0.671	0.87069	0.87065	1	15306	0	-0.671
VBP1	4	0.032779	0.083523	0.814562	1912	3	-0.4785	0.8082	0.80859	1	14213	1	-0.4785
RNF175	4	0.032791	0.083544	0.814562	1913	3	-0.8257	0.70789	0.72835	1	12874	1	-0.8257
MCMBP	4	0.032814	0.083601	0.814562	1914	3	-0.6048	0.55594	0.63964	1	11337	1	-0.6048
HNRNPC	2	0.032816	0.059752	0.680795	1915	2	-1.4856	0.94046	0.94036	1	16637	0	-1.4856
SELENOT	4	0.032845	0.083645	0.814562	1916	3	-0.73097	0.98478	0.98479	1	17665	0	-0.73097
HPCAL4	4	0.032849	0.083654	0.814562	1917	3	-0.59985	0.90138	0.90142	1	15874	0	-0.59985
UQCC1	4	0.032879	0.083723	0.814645	1918	3	-0.56425	0.97715	0.97736	1	17445	0	-0.56425
CHCHD10	4	0.03289	0.083753	0.814645	1919	3	-0.64242	0.92192	0.92208	1	16276	0	-0.64242
IGSF10	4	0.03291	0.083793	0.814645	1920	2	-0.42622	0.40157	0.54707	1	9841	2	-0.42622
PANX1	4	0.032931	0.083848	0.814757	1921	3	-0.5669	0.85907	0.85896	1	15094	0	-0.5669
PHACTR2	4	0.032964	0.083917	0.815	1922	2	-0.34078	0.19838	0.33708	0.971344	6446	2	-0.34078
MOV10L1	4	0.032984	0.08396	0.815	1923	3	-0.58915	0.87029	0.87025	1	15300	0	-0.58915
GEMIN2	4	0.033066	0.084119	0.815846	1924	3	-0.56667	0.36373	0.50793	1	9198	1	-0.56667
TRIM45	4	0.033073	0.084134	0.815846	1925	3	-0.61927	0.95621	0.95628	1	16960	0	-0.61927
CITED2	4	0.033161	0.084322	0.817251	1926	3	-0.51887	0.81469	0.81482	1	14326	1	-0.51887
PRDM13	4	0.033197	0.084399	0.817532	1927	3	-0.66312	0.67196	0.70484	1	12449	1	-0.66312
SLC25A51	4	0.033214	0.084438	0.817532	1928	3	-0.69529	0.74093	0.75205	1	13281	1	-0.69529
VPS36	4	0.03325	0.084506	0.817764	1929	3	-0.63141	0.98218	0.98222	1	17598	0	-0.63141
RBM48	4	0.033279	0.084579	0.818047	1930	2	-0.64432	0.48211	0.60491	1	10740	1	-0.64432
FGF7	4	0.033331	0.084698	0.818779	1931	1	0.15495	0.37131	0.51577	1	9325	2	0.15495
PAF1	4	0.03342	0.084885	0.820158	1932	3	-1.1014	0.2295	0.3694	0.99081	6924	1	-1.1014
ITPKA	4	0.03351	0.08508	0.821627	1933	3	-0.49539	0.93478	0.93486	1	16527	0	-0.49539
PLA2G4D	4	0.033534	0.085124	0.821627	1934	3	-0.57265	0.8646	0.86456	1	15203	0	-0.57265
GRB2	4	0.033595	0.085241	0.822335	1935	3	-0.75554	0.88995	0.88994	1	15648	0	-0.75554
CCT8L2	4	0.033683	0.085416	0.822786	1936	3	-0.61243	0.60545	0.66579	1	11755	1	-0.61243
BMS1	4	0.033694	0.085441	0.822786	1937	2	-0.63163	0.88183	0.88186	1	15495	0	-0.63163
CHKB	4	0.033701	0.085456	0.822786	1938	3	-0.67982	0.86858	0.86853	1	15268	0	-0.67982
ATRX	4	0.033705	0.085464	0.822786	1939	2	-0.24842	0.138	0.27429	0.936799	5401	2	-0.24842
NSMF	4	0.033759	0.085574	0.823078	1940	2	-0.46283	0.69805	0.72174	1	12750	1	-0.46283
GREB1L	4	0.033772	0.085599	0.823078	1941	3	-0.60074	0.98822	0.98823	1	17774	0	-0.60074
SLC9A5	4	0.033802	0.085655	0.823078	1942	3	-0.65964	0.93603	0.93608	1	16547	0	-0.65964
ABCC12	4	0.033808	0.08567	0.823078	1943	3	-0.54354	0.95753	0.95759	1	16992	0	-0.54354
KCNK5	4	0.034001	0.086093	0.826685	1944	2	-0.6714	0.88659	0.88659	1	15578	0	-0.6714
KRT78	4	0.034021	0.086133	0.826685	1945	3	-0.3661	0.92057	0.92071	1	16261	0	-0.3661
KIF7	4	0.034056	0.086208	0.826981	1946	3	-0.73952	0.98079	0.98086	1	17555	0	-0.73952
COPS8	4	0.034156	0.086425	0.828549	1947	3	-0.68394	0.98305	0.98308	1	17621	0	-0.68394
PIF1	4	0.034168	0.08646	0.828549	1948	3	-0.51667	0.57418	0.64888	1	11498	1	-0.51667
SGSM1	4	0.034221	0.086557	0.829056	1949	2	-0.41262	0.74595	0.75587	1	13343	1	-0.41262
TSEN54	4	0.034243	0.086608	0.829123	1950	2	-0.68793	0.9108	0.91081	1	16069	0	-0.68793
HBQ1	4	0.034403	0.086939	0.831862	1951	3	-0.63514	0.89373	0.89368	1	15721	0	-0.63514
DDX6	4	0.034427	0.086987	0.831903	1952	3	-0.47256	0.98744	0.98743	1	17746	0	-0.47256
CDKN2AIP	4	0.034498	0.087137	0.832912	1953	3	-0.67698	0.94217	0.94224	1	16669	0	-0.67698
LDLRAD1	4	0.034596	0.087317	0.834208	1954	3	-0.58796	0.79303	0.79475	1	13985	1	-0.58796
BPHL	4	0.034681	0.08748	0.835336	1955	3	-0.6498	0.82599	0.826	1	14510	0	-0.6498
RFK	4	0.034774	0.087676	0.836661	1956	2	-0.5252	0.97496	0.97512	1	17388	0	-0.5252
HTT	4	0.034809	0.087756	0.836661	1957	3	-0.54112	0.8491	0.84903	1	14915	0	-0.54112
CDIP1	4	0.034833	0.087808	0.836661	1958	3	-0.73075	0.98849	0.98851	1	17787	0	-0.73075
CREB3L1	4	0.034863	0.087869	0.836661	1959	3	-0.77678	0.98893	0.98893	1	17801	0	-0.77678
C9orf78	4	0.034869	0.087883	0.836661	1960	1	0.054367	0.3484	0.49213	1	8934	2	0.054367
C1orf216	4	0.03487	0.087886	0.836661	1961	3	-0.57772	0.93526	0.93533	1	16533	0	-0.57772
CFAP221	4	0.035007	0.088163	0.83886	1962	2	-0.41883	0.75568	0.76351	1	13463	1	-0.41883
CTSW	4	0.03503	0.088207	0.83886	1963	2	-0.54087	0.94065	0.9407	1	16645	0	-0.54087
SIRT6	4	0.03508	0.088326	0.839254	1964	1	0.58181	0.012818	0.042179	0.709238	1081	3	0.58181
GPRIN2	4	0.035089	0.088338	0.839254	1965	3	-0.42709	0.87544	0.87548	1	15385	0	-0.42709
GCM1	4	0.035119	0.088404	0.839461	1966	2	-0.54165	0.68219	0.71138	1	12558	1	-0.54165
MYBPH	4	0.035186	0.08856	0.839891	1967	2	-0.17882	0.71375	0.73238	1	12944	1	-0.17882
VDAC2	4	0.035219	0.088632	0.839891	1968	2	-0.54542	0.030305	0.081403	0.814034	1807	1	-0.54542
PRSS33	4	0.035253	0.088708	0.839891	1969	2	-0.52399	0.96285	0.96288	1	17114	0	-0.52399
NHLRC2	4	0.035264	0.088736	0.839891	1970	3	-0.67545	0.88869	0.88869	1	15615	0	-0.67545
TOMM34	4	0.035279	0.08877	0.839891	1971	3	-0.62484	0.97511	0.97529	1	17391	0	-0.62484
GRIK3	4	0.035291	0.088792	0.839891	1972	3	-0.74573	0.71381	0.73242	1	12947	1	-0.74573
WDFY3	4	0.035303	0.088812	0.839891	1973	3	-0.53105	0.020808	0.061656	0.767146	1456	1	-0.53105
EIF1B	4	0.035334	0.088872	0.839891	1974	3	-0.49725	0.67978	0.70984	1	12533	1	-0.49725
ATAD1	4	0.035342	0.088889	0.839891	1975	2	-0.41673	0.41308	0.55894	1	10045	2	-0.41673
ACO2	4	0.035346	0.088897	0.839891	1976	3	-0.50643	0.96408	0.96415	1	17144	0	-0.50643
BAIAP2L2	4	0.035376	0.088965	0.840106	1977	2	-0.46277	0.80391	0.80463	1	14136	1	-0.46277
MED15	4	0.035488	0.089194	0.841726	1978	2	-0.64813	0.92901	0.92916	1	16415	0	-0.64813
MLYCD	4	0.035506	0.089226	0.841726	1979	3	-0.56631	0.88911	0.8891	1	15627	0	-0.56631
G6PD	4	0.035557	0.089328	0.842259	1980	1	-0.18502	0.55092	0.63713	1	11294	1	-0.18502
CYB5D2	4	0.035636	0.089477	0.842864	1981	3	-0.62844	0.9121	0.91212	1	16096	0	-0.62844
TULP1	4	0.035648	0.089502	0.842864	1982	3	-0.62148	0.9882	0.98821	1	17773	0	-0.62148
GINS4	4	0.03566	0.089527	0.842864	1983	3	-0.53453	0.84393	0.84385	1	14816	0	-0.53453
NOC4L	4	0.035701	0.089608	0.843206	1984	3	-0.58068	0.98847	0.98849	1	17786	0	-0.58068
XRRA1	4	0.035728	0.089661	0.84328	1985	3	-0.48704	0.98724	0.98722	1	17739	0	-0.48704
DAP	4	0.035768	0.08974	0.843597	1986	2	-0.65743	0.94654	0.94659	1	16760	0	-0.65743
CRHBP	4	0.035821	0.089848	0.844191	1987	3	-0.51904	0.75498	0.76294	1	13454	1	-0.51904
FTSJ3	4	0.035889	0.089985	0.845057	1988	3	-0.50693	0.98557	0.98557	1	17687	0	-0.50693
IL1R1	4	0.035928	0.090077	0.845341	1989	2	-0.0097802	0.33252	0.47566	1	8670	2	-0.0097802
RAB3GAP1	4	0.035945	0.090105	0.845341	1990	3	-0.72951	0.48118	0.60448	1	10734	1	-0.72951
NOXA1	4	0.03597	0.090154	0.845379	1991	3	-0.45969	0.85047	0.85041	1	14945	0	-0.45969
INTS13	4	0.035994	0.090205	0.845426	1992	3	-0.64416	0.78982	0.79192	1	13936	1	-0.64416
C2orf73	4	0.036026	0.090267	0.845588	1993	3	-0.54481	0.98329	0.98331	1	17624	0	-0.54481
LRRC24	4	0.036044	0.090312	0.845591	1994	3	-0.47804	0.80336	0.80415	1	14126	1	-0.47804
MTRF1	4	0.036088	0.090409	0.846078	1995	3	-0.58859	0.92577	0.92594	1	16353	0	-0.58859
DUS2	4	0.036119	0.090462	0.846149	1996	3	-0.52326	0.93845	0.93847	1	16597	0	-0.52326
RARA	4	0.036169	0.090562	0.846656	1997	3	-0.61665	0.96753	0.96758	1	17223	0	-0.61665
IFT122	4	0.0362	0.090631	0.84688	1998	3	-0.55924	0.895	0.89499	1	15744	0	-0.55924
MTHFD2	4	0.03623	0.090694	0.847045	1999	3	-0.6106	0.92941	0.92954	1	16426	0	-0.6106
[truncated: 16,755 more rows]
