# Supplementary material for: Surfaceome CRISPR screen identifies OLFML3 as a rhinovirus-inducible IFN antagonist
Source: Genome Biol. 2021 Oct 22;22:297. doi: 10.1186/s13059-021-02513-w (PMC8532573; doi:10.1186/s13059-021-02513-w)
Supplement: Supplementary file 6 — Additional file 6. MAGeCK analysis of essential and nonessential genes of surfaceome screen. [file 13059_2021_2513_MOESM6_ESM.xlsx]

## Sheet: Surfaceome mock vs input
id	num	neg|score	neg|p-value	neg|fdr	neg|rank	neg|goodsgrna	neg|lfc	pos|score	pos|p-value	pos|fdr	pos|rank	pos|goodsgrna	pos|lfc
PHB2	12	1.1966e-18	2.112e-06	0.000291	1	11	-2.8236	0.93475	0.97491	0.999998	2162	1	-2.8236
ATP1A1	12	9.4729e-16	2.112e-06	0.000291	2	12	-2.8094	1	1	0.999998	2340	0	-2.8094
GMPPB	12	4.2232e-15	2.112e-06	0.000291	3	12	-1.9532	1	1	0.999998	2341	0	-1.9532
TUBB	12	4.3265e-14	2.112e-06	0.000291	4	11	-2.0002	0.99999	1	0.999998	2336	0	-2.0002
HNRNPU	12	7.9989e-14	2.112e-06	0.000291	5	12	-1.8992	1	1	0.999998	2339	0	-1.8992
RPN1	12	1.7859e-13	2.112e-06	0.000291	6	12	-1.5949	1	1	0.999998	2344	0	-1.5949
AARS	12	2.1037e-13	2.112e-06	0.000291	7	12	-2.2045	1	1	0.999998	2343	0	-2.2045
RPL3	8	5.3932e-12	2.112e-06	0.000291	8	8	-2.0056	0.99998	0.99999	0.999998	2333	0	-2.0056
NOP56	12	1.4473e-11	2.112e-06	0.000291	9	10	-1.9312	0.66471	0.87127	0.999998	1853	2	-1.9312
UBA1	12	3.2278e-11	2.112e-06	0.000291	10	12	-1.9579	1	1	0.999998	2342	0	-1.9579
CCT4	12	3.9e-10	2.112e-06	0.000291	11	11	-2.0775	0.64907	0.8626	0.999998	1833	1	-2.0775
CLTC	12	5.7144e-10	2.112e-06	0.000291	12	11	-1.5262	0.90986	0.96841	0.999998	2133	1	-1.5262
HYOU1	12	7.4746e-09	2.112e-06	0.000291	13	11	-1.4484	0.99123	0.99282	0.999998	2269	1	-1.4484
ATP6AP1	12	3.0898e-08	2.112e-06	0.000291	14	9	-1.2398	0.99943	0.99931	0.999998	2320	0	-1.2398
SNRPD2	12	3.1424e-08	2.112e-06	0.000291	15	10	-1.3077	0.99507	0.99496	0.999998	2287	1	-1.3077
RPL18	12	3.1872e-08	2.112e-06	0.000291	16	10	-1.4376	0.42007	0.71381	0.999998	1521	2	-1.4376
SLC4A7	12	3.9089e-08	2.112e-06	0.000291	17	11	-0.91714	0.99931	0.99917	0.999998	2317	0	-0.91714
PFN1	12	2.877e-07	1.056e-05	0.001238	18	11	-1.1488	0.90718	0.96774	0.999998	2126	1	-1.1488
UQCRC2	12	3.0218e-07	1.056e-05	0.001238	19	11	-0.93544	0.437	0.72822	0.999998	1542	1	-0.93544
GMPS	12	5.463e-07	1.056e-05	0.001238	20	10	-0.93894	0.98432	0.99031	0.999998	2246	1	-0.93894
RPN2	12	6.55e-07	1.4784e-05	0.001575	21	12	-0.94294	1	1	0.999998	2338	0	-0.94294
RPLP2	12	1.087e-06	1.4784e-05	0.001575	22	7	-0.37241	0.062133	0.21774	0.599039	575	3	-0.37241
RPL28	11	1.7831e-06	2.3232e-05	0.002269	23	9	-1.0046	0.99368	0.99359	0.999998	2281	1	-1.0046
IGF1R	12	1.9937e-06	2.3232e-05	0.002269	24	10	-0.77806	0.99907	0.99891	0.999998	2315	0	-0.77806
SEC22B	12	2.97e-06	3.168e-05	0.00297	25	12	-1.0125	0.99999	1	0.999998	2337	0	-1.0125
ENO1	12	4.562e-06	6.5472e-05	0.005903	26	11	-0.93109	0.99972	0.99969	0.999998	2327	0	-0.93109
HNRNPK	12	9.7119e-06	9.0815e-05	0.007884	27	8	-0.84778	0.60109	0.83566	0.999998	1757	2	-0.84778
B3GNT2	12	1.093e-05	0.00010349	0.008663	28	11	-0.63758	0.80525	0.93092	0.999998	1999	1	-0.63758
MYH9	12	1.3025e-05	0.00011194	0.009047	29	11	-0.56017	0.99641	0.99623	0.999998	2293	1	-0.56017
XRCC6	12	1.5886e-05	0.00013306	0.010396	30	8	-0.99242	0.68704	0.88387	0.999998	1890	2	-0.99242
TFRC	12	1.9973e-05	0.00015417	0.011658	31	11	-0.84041	0.22373	0.5091	0.892552	1170	1	-0.84041
ITGAV	12	2.222e-05	0.00016685	0.012222	32	10	-0.43904	0.99952	0.99945	0.999998	2322	0	-0.43904
PCBP2	12	3.1963e-05	0.000264	0.0182	33	8	-0.89837	0.45833	0.74688	0.999998	1575	2	-0.89837
BVES	12	3.3461e-05	0.00027667	0.018529	34	8	-0.95034	0.58212	0.8249	0.999998	1733	3	-0.95034
PDE4B	12	4.7052e-05	0.00039917	0.024622	35	10	-0.62903	0.99998	0.99999	0.999998	2334	0	-0.62903
ATG9A	12	5.9677e-05	0.00050899	0.030592	36	10	-0.7149	0.99764	0.99754	0.999998	2305	0	-0.7149
PRKCSH	12	8.3448e-05	0.00069484	0.040718	37	11	-0.38562	0.99756	0.99744	0.999998	2304	0	-0.38562
SLC12A7	12	9.7584e-05	0.00078777	0.045037	38	9	-0.77058	0.96829	0.98666	0.999998	2224	1	-0.77058
LTBP3	12	0.0001004	0.00082156	0.045851	39	10	-0.43484	0.88605	0.96302	0.999998	2099	1	-0.43484
CACHD1	12	0.00011018	0.00089759	0.047415	40	11	-0.48931	0.91757	0.97021	0.999998	2143	1	-0.48931
BIRC6	12	0.00011227	0.00091027	0.047415	41	11	-0.51539	0.995	0.9949	0.999998	2286	1	-0.51539
ATP1B3	12	0.00012032	0.00098207	0.050043	42	9	-0.64513	0.61052	0.84096	0.999998	1773	2	-0.64513
TM2D1	12	0.00012784	0.0010433	0.052033	43	10	-0.5264	0.58749	0.82794	0.999998	1740	2	-0.5264
DummyGuide_1750	1	0.00020619	0.00018797	0.013351	44	1	-1.6039	0.99979	0.9998	0.999998	2329	0	-1.6039
NOTCH2	12	0.00031479	0.0024647	0.107561	45	9	-0.54603	0.99861	0.99855	0.999998	2310	0	-0.54603
SLC6A9	12	0.00032107	0.0025238	0.107561	46	9	-0.48637	0.47069	0.75721	0.999998	1598	3	-0.48637
DummyGuide_1265	1	0.00032401	0.00031046	0.020215	47	1	-2.1494	0.99968	0.99968	0.999998	2326	0	-2.1494
DummyGuide_1364	1	0.00038292	0.00039072	0.024622	48	1	-2.1754	0.99962	0.99964	0.999998	2324	0	-2.1754
INTS12	12	0.00052834	0.0040149	0.159507	49	10	-0.46203	0.99464	0.99463	0.999998	2282	1	-0.46203
SCN2A	12	0.00052876	0.0040149	0.159507	50	6	-0.40575	0.77505	0.92031	0.999998	1972	3	-0.40575
ZNF844	12	0.00062926	0.0046907	0.178936	51	9	-0.45832	0.79358	0.92664	0.999998	1987	2	-0.45832
SLC1A4	12	0.00063219	0.0047076	0.178936	52	10	-0.42877	0.94079	0.97666	0.999998	2172	2	-0.42877
SV2A	12	0.00063606	0.004733	0.178936	53	9	-0.47049	0.99987	0.99987	0.999998	2330	0	-0.47049
RPL35A	3	0.00064215	0.0020634	0.096733	54	3	-1.9226	0.99936	0.99943	0.999998	2319	0	-1.9226
DummyGuide_1305	1	0.0008542	0.00087225	0.047415	55	1	-1.5903	0.99915	0.99915	0.999998	2316	0	-1.5903
PPIB	12	0.00087012	0.0061438	0.221554	56	9	-0.42974	0.99634	0.99618	0.999998	2292	1	-0.42974
RSL1D1	12	0.00093836	0.0065577	0.232898	57	9	-0.58187	0.99892	0.99879	0.999998	2314	0	-0.58187
MMP13	12	0.00097229	0.0068365	0.235658	58	3	0.17233	0.089458	0.28294	0.674672	712	6	0.17233
FSTL1	12	0.0010826	0.0075926	0.251739	59	8	-0.35656	0.30121	0.60313	0.955235	1343	2	-0.35656
DummyGuide_1083	1	0.0010898	0.0010708	0.05229	60	1	-1.8019	0.99891	0.99894	0.999998	2313	0	-1.8019
HSPD1	5	0.0011061	0.0048217	0.179397	61	4	-1.0589	0.99063	0.99052	0.999998	2266	0	-1.0589
SORT1	12	0.0011395	0.0079009	0.251739	62	10	-0.49592	0.99999	1	0.999998	2335	0	-0.49592
PTPRJ	12	0.0012232	0.0084458	0.26396	63	9	-0.40563	0.95528	0.98145	0.999998	2194	1	-0.40563
IL17RD	12	0.0012476	0.0086021	0.265307	64	10	-0.36233	0.97466	0.9882	0.999998	2235	1	-0.36233
DGCR2	12	0.0013434	0.0091555	0.272339	65	8	-0.46215	0.99645	0.99629	0.999998	2294	0	-0.46215
KITLG	12	0.0013653	0.0092949	0.272339	66	6	-0.35352	0.90957	0.96831	0.999998	2132	2	-0.35352
DummyGuide_1172	1	0.0014433	0.0014045	0.067185	67	1	-1.8948	0.99856	0.99862	0.999998	2309	0	-1.8948
TACSTD2	12	0.001483	0.0099707	0.283729	68	9	-0.38764	0.40798	0.70288	0.999998	1497	3	-0.38764
PGS1	12	0.0015043	0.010047	0.283729	69	9	-0.54454	0.61013	0.84076	0.999998	1772	2	-0.54454
PTGER3	12	0.0016009	0.0106	0.291055	70	8	-0.44913	0.99681	0.99664	0.999998	2295	0	-0.44913
PPT1	12	0.0016398	0.010803	0.291055	71	9	-0.40663	0.87052	0.95669	0.999998	2076	2	-0.40663
SSR1	12	0.0016995	0.011141	0.296748	72	9	-0.41725	0.013	0.06454	0.360196	194	1	-0.41725
IL17D	12	0.0017659	0.011436	0.297855	73	6	-0.22599	0.81333	0.93407	0.999998	2007	3	-0.22599
FAT4	12	0.0018302	0.011838	0.304918	74	8	-0.51143	0.43725	0.72843	0.999998	1543	2	-0.51143
LRRC8B	12	0.0020052	0.012792	0.325926	75	9	-0.43229	0.54305	0.80304	0.999998	1692	3	-0.43229
ITGAM	12	0.0021283	0.013439	0.332426	76	9	-0.51778	0.9295	0.97335	0.999998	2155	2	-0.51778
CD63	12	0.0021791	0.013747	0.332426	77	8	-0.4133	0.98725	0.99131	0.999998	2253	1	-0.4133
ITGA11	12	0.0021793	0.013747	0.332426	78	7	-0.50247	0.90782	0.96791	0.999998	2127	2	-0.50247
SLC36A4	12	0.0022539	0.014182	0.332426	79	9	-0.48211	0.99471	0.99469	0.999998	2283	1	-0.48211
DummyGuide_1953	1	0.0024448	0.0023929	0.107561	80	1	-1.219	0.99756	0.99756	0.999998	2303	0	-1.219
DummyGuide_1643	1	0.0025037	0.0024436	0.107561	81	1	-1.9592	0.9975	0.99753	0.999998	2302	0	-1.9592
DummyGuide_1836	1	0.0026215	0.0025154	0.107561	82	1	-1.8056	0.99738	0.99743	0.999998	2299	0	-1.8056
DummyGuide_1926	1	0.0027393	0.0025914	0.108469	83	1	-1.7962	0.99726	0.99727	0.999998	2298	0	-1.7962
HEXB	12	0.0028227	0.017426	0.383316	84	4	0.056614	0.23538	0.52523	0.903916	1199	6	0.056614
S1PR1	12	0.0028341	0.017498	0.383316	85	8	-0.38219	0.94096	0.97672	0.999998	2173	2	-0.38219
DummyGuide_1436	1	0.0028571	0.0027223	0.111951	86	1	-1.4461	0.99714	0.99716	0.999998	2297	0	-1.4461
TPI1	10	0.0028723	0.016252	0.366289	87	7	-0.52079	0.15043	0.38412	0.783622	953	2	-0.52079
GAPDH	9	0.0029474	0.016421	0.366572	88	5	-0.22927	0.16913	0.40084	0.798477	1013	4	-0.22927
RCN1	12	0.0029757	0.018169	0.394344	89	7	-0.35735	0.068467	0.23351	0.624107	606	4	-0.35735
IGSF3	12	0.0030873	0.018706	0.402262	90	9	-0.34674	0.99977	0.99974	0.999998	2328	0	-0.34674
PSAP	12	0.0031521	0.019069	0.406346	91	8	-0.53438	0.93607	0.97534	0.999998	2166	1	-0.53438
COL1A1	12	0.0032247	0.019356	0.40875	92	9	-0.48955	0.93594	0.97532	0.999998	2165	2	-0.48955
LIPA	12	0.0035053	0.020907	0.429712	93	8	-0.34446	0.63049	0.8521	0.999998	1801	1	-0.34446
BSG	12	0.0035789	0.021236	0.429712	94	6	-0.13579	0.81241	0.93366	0.999998	2005	3	-0.13579
DPP4	12	0.0035794	0.021236	0.429712	95	7	-0.23766	0.65284	0.86489	0.999998	1838	1	-0.23766
CDSN	12	0.0035905	0.021266	0.429712	96	9	-0.3185	0.74802	0.91046	0.999998	1947	3	-0.3185
TRAP1	12	0.0040554	0.023682	0.470423	97	8	-0.36921	0.99621	0.99603	0.999998	2291	1	-0.36921
TNC	12	0.0042046	0.0244	0.480614	98	4	0.0099713	0.47814	0.76336	0.999998	1613	2	0.0099713
LEMD2	12	0.0044325	0.02557	0.499464	99	9	-0.48752	0.79891	0.92852	0.999998	1992	2	-0.48752
GPR155	12	0.0045399	0.026144	0.49992	100	9	-0.28717	0.96421	0.98487	0.999998	2215	1	-0.28717
C4A	12	0.0046267	0.026664	0.501822	101	8	-0.20114	0.64526	0.86037	0.999998	1826	3	-0.20114
CASC4	12	0.0046411	0.026761	0.501822	102	7	-0.30774	0.84228	0.94545	0.999998	2043	2	-0.30774
CD5	12	0.0048533	0.027809	0.512415	103	7	-0.31636	0.98717	0.99129	0.999998	2252	1	-0.31636
INHBE	12	0.004885	0.027982	0.512415	104	8	-0.40729	0.99877	0.99863	0.999998	2311	0	-0.40729
MAN2B1	12	0.0049933	0.028518	0.51819	105	8	-0.32055	0.70411	0.89314	0.999998	1907	3	-0.32055
DummyGuide_1685	1	0.0051546	0.0050836	0.186185	106	1	-1.2832	0.99485	0.99507	0.999998	2285	0	-1.2832
IGFBP3	12	0.005289	0.029988	0.52896	107	6	-0.13984	0.68347	0.88204	0.999998	1880	4	-0.13984
TSPAN18	12	0.0052991	0.030026	0.52896	108	8	-0.37084	0.96641	0.98587	0.999998	2219	1	-0.37084
LRRC8C	12	0.0053221	0.030123	0.52896	109	8	-0.39109	0.49766	0.77722	0.999998	1640	2	-0.39109
SLC29A2	12	0.0054617	0.030867	0.52896	110	9	-0.29511	0.93123	0.97388	0.999998	2157	2	-0.29511
CLPTM1L	12	0.0055325	0.031209	0.52896	111	9	-0.40458	0.99947	0.99939	0.999998	2321	0	-0.40458
CFH	12	0.0055655	0.031331	0.52896	112	7	-0.26122	0.95265	0.98057	0.999998	2190	2	-0.26122
MARCKS	12	0.0055971	0.031509	0.52896	113	9	-0.32834	0.88283	0.9617	0.999998	2094	1	-0.32834
NAGPA	12	0.005984	0.033363	0.543076	114	7	-0.45012	0.35607	0.6549	0.987112	1420	5	-0.45012
FGFR1	12	0.006101	0.033959	0.548959	115	8	-0.37941	0.99225	0.99328	0.999998	2276	1	-0.37941
S1PR3	12	0.0062982	0.035032	0.558665	116	5	-0.083115	0.17591	0.43821	0.840567	1029	3	-0.083115
ABCA8	12	0.0062985	0.035036	0.558665	117	5	0.1082	0.02644	0.11442	0.459235	316	6	0.1082
ACP2	12	0.0063715	0.035407	0.559406	118	9	-0.42436	0.97334	0.988	0.999998	2232	1	-0.42436
SCAP	12	0.0063971	0.03556	0.559406	119	9	-0.45103	0.99994	0.99996	0.999998	2332	0	-0.45103
EDNRA	12	0.0066057	0.036539	0.565739	120	8	-0.34347	0.079973	0.26124	0.652121	661	4	-0.34347
FAM20B	12	0.0067006	0.036983	0.565739	121	7	-0.48228	0.9588	0.98278	0.999998	2203	2	-0.48228
APLNR	12	0.0067091	0.037021	0.565739	122	9	-0.1959	0.98401	0.99025	0.999998	2245	1	-0.1959
PTPRF	12	0.0067343	0.037169	0.565739	123	9	-0.29951	0.90901	0.96819	0.999998	2130	2	-0.29951
TMEM132A	12	0.0068102	0.03749	0.566943	124	9	-0.22378	0.99743	0.99729	0.999998	2301	0	-0.22378
ROBO1	12	0.0069	0.037929	0.56991	125	8	-0.45379	0.84953	0.94832	0.999998	2051	2	-0.45379
DummyGuide_1897	1	0.0070987	0.0068112	0.235658	126	1	-1.3082	0.9929	0.99306	0.999998	2278	0	-1.3082
GLCE	12	0.0071213	0.038981	0.581983	127	9	-0.25872	0.86503	0.95454	0.999998	2067	2	-0.25872
CD1B	12	0.0072901	0.039792	0.586618	128	9	-0.26862	0.86752	0.9555	0.999998	2072	2	-0.26862
PLD3	12	0.0076961	0.041819	0.601379	129	8	-0.3962	0.8101	0.93272	0.999998	2004	3	-0.3962
DummyGuide_1828	1	0.0078645	0.007525	0.251739	130	1	-1.6225	0.99214	0.99228	0.999998	2275	0	-1.6225
DCHS1	12	0.0079477	0.042935	0.608285	131	8	-0.29089	0.98037	0.98945	0.999998	2240	1	-0.29089
DummyGuide_1601	1	0.0079823	0.007694	0.251739	132	1	-1.1166	0.99202	0.99216	0.999998	2273	0	-1.1166
DummyGuide_1996	1	0.0080412	0.0077489	0.251739	133	1	-1.7952	0.99196	0.99212	0.999998	2271	0	-1.7952
RPL35	3	0.0081439	0.0223	0.446772	134	2	-1.818	0.84969	0.8503	0.999998	2052	0	-1.818
DummyGuide_1143	1	0.0082769	0.0079474	0.251739	135	1	-1.428	0.99172	0.99188	0.999998	2270	0	-1.428
VDAC2	4	0.0085788	0.028957	0.522125	136	3	-0.78358	0.3991	0.54719	0.919155	1491	1	-0.78358
TYR	12	0.0087589	0.046348	0.642662	137	7	-0.36819	0.99343	0.99389	0.999998	2279	1	-0.36819
CD2	12	0.0088109	0.046609	0.642662	138	7	-0.43814	0.91497	0.96961	0.999998	2139	2	-0.43814
SLITRK4	12	0.008959	0.047154	0.646373	139	5	-0.03724	0.091599	0.28775	0.679713	723	4	-0.03724
RPL9	1	0.0095729	0.0091681	0.272339	140	1	-1.7182	0.99043	0.99062	0.999998	2265	0	-1.7182
RPS23	8	0.0096205	0.042787	0.608285	141	5	-0.37563	0.19905	0.42859	0.826969	1098	2	-0.37563
DummyGuide_1963	1	0.0096318	0.0092442	0.272339	142	1	-1.2564	0.99037	0.99056	0.999998	2264	0	-1.2564
GPI	12	0.0097897	0.050597	0.681717	143	8	-0.28603	0.8043	0.93059	0.999998	1997	2	-0.28603
PRNP	12	0.0097921	0.050605	0.681717	144	8	-0.39357	0.60813	0.83972	0.999998	1770	4	-0.39357
DummyGuide_1974	1	0.0098085	0.0094934	0.274722	145	1	-1.1274	0.99019	0.99037	0.999998	2262	0	-1.1274
NCR3	12	0.010005	0.051459	0.686572	146	6	-0.31282	0.78145	0.92254	0.999998	1977	1	-0.31282
OLFML2B	12	0.010028	0.051551	0.686572	147	8	-0.31424	0.83142	0.94125	0.999998	2024	1	-0.31424
DummyGuide_1876	1	0.010574	0.010292	0.287188	148	1	-1.1588	0.98943	0.98962	0.999998	2260	0	-1.1588
TNXB	12	0.010661	0.054073	0.716088	149	4	0.23158	0.044373	0.17204	0.544027	460	7	0.23158
CP	12	0.010802	0.054698	0.720297	150	8	-0.30974	0.64272	0.85908	0.999998	1822	2	-0.30974
DummyGuide_1389	1	0.010987	0.010693	0.291055	151	1	-1.2671	0.98901	0.98926	0.999998	2258	0	-1.2671
MSLN	12	0.011054	0.055746	0.728675	152	8	-0.36875	0.77288	0.91952	0.999998	1969	3	-0.36875
C4BPB	12	0.011143	0.056088	0.728675	153	5	-0.10402	0.44319	0.73353	0.999998	1550	4	-0.10402
DummyGuide_1476	1	0.011694	0.011365	0.297855	154	1	-1.3802	0.98831	0.98851	0.999998	2255	0	-1.3802
SSR2	12	0.01213	0.06008	0.757133	155	7	-0.35252	0.528	0.79469	0.999998	1675	3	-0.35252
LEPR	12	0.013133	0.064198	0.785178	156	8	-0.27592	0.55799	0.81155	0.999998	1708	3	-0.27592
CTSK	12	0.013272	0.064658	0.785178	157	8	-0.45085	0.99207	0.99321	0.999998	2274	1	-0.45085
CA12	12	0.01338	0.064996	0.785178	158	7	-0.38157	0.98309	0.99008	0.999998	2242	1	-0.38157
DummyGuide_1977	1	0.013402	0.013147	0.331364	159	1	-1.0671	0.9866	0.98671	0.999998	2251	0	-1.0671
HPX	12	0.013406	0.065077	0.785178	160	7	-0.37144	0.9654	0.98543	0.999998	2218	2	-0.37144
OLFML3	12	0.013526	0.065575	0.785178	161	6	-0.16283	0.95954	0.98308	0.999998	2206	1	-0.16283
TMEM106B	12	0.013698	0.0662	0.785178	162	4	0.079509	0.067268	0.23063	0.622082	602	4	0.079509
MFNG	12	0.013744	0.066428	0.785178	163	8	-0.30266	0.99954	0.99948	0.999998	2323	0	-0.30266
CSF1	12	0.013752	0.066466	0.785178	164	7	-0.37475	0.96796	0.98655	0.999998	2223	2	-0.37475
ROR1	12	0.013896	0.067037	0.785178	165	8	-0.34234	0.81379	0.93424	0.999998	2009	3	-0.34234
RTN4	12	0.014116	0.067928	0.785178	166	8	-0.41467	0.81958	0.93641	0.999998	2018	3	-0.41467
EMP1	12	0.014135	0.068	0.785178	167	4	0.058694	0.86619	0.95498	0.999998	2070	1	0.058694
DummyGuide_1147	1	0.014227	0.013958	0.332426	168	1	-1.1803	0.98577	0.98593	0.999998	2250	0	-1.1803
HSPA8	10	0.0144	0.065575	0.785178	169	6	-0.49064	0.44575	0.71017	0.999998	1557	3	-0.49064
DummyGuide_1979	1	0.014404	0.01411	0.332426	170	1	-1.9781	0.9856	0.98576	0.999998	2249	0	-1.9781
DummyGuide_1455	1	0.014462	0.014148	0.332426	171	1	-1.1139	0.98554	0.98573	0.999998	2248	0	-1.1139
SUSD2	12	0.014476	0.069267	0.792632	172	8	-0.33545	0.96516	0.98532	0.999998	2217	1	-0.33545
EXTL2	12	0.014553	0.069541	0.792632	173	8	-0.39882	0.77361	0.91973	0.999998	1970	2	-0.39882
S1PR5	12	0.014591	0.06966	0.792632	174	6	-0.23076	0.81328	0.93405	0.999998	2006	2	-0.23076
CERCAM	12	0.014835	0.070623	0.796654	175	8	-0.32315	0.73877	0.90741	0.999998	1940	3	-0.32315
IL2RB	12	0.014922	0.07107	0.796654	176	8	-0.2832	0.87974	0.96047	0.999998	2088	2	-0.2832
F2	12	0.014932	0.071117	0.796654	177	8	-0.29994	0.99783	0.99771	0.999998	2306	0	-0.29994
ZDHHC23	12	0.015004	0.071421	0.796654	178	4	0.030148	0.1634	0.41867	0.820176	990	5	0.030148
MYOF	12	0.015072	0.071712	0.796654	179	7	-0.18022	0.83499	0.9426	0.999998	2028	3	-0.18022
DummyGuide_1783	1	0.015464	0.015149	0.351583	180	1	-1.4435	0.98454	0.98477	0.999998	2247	0	-1.4435
PLXNB3	12	0.015539	0.073685	0.806726	181	7	-0.35769	0.59496	0.83224	0.999998	1749	3	-0.35769
CLPTM1	12	0.015818	0.074716	0.806726	182	7	-0.22503	0.22649	0.51311	0.896302	1175	2	-0.22503
ABCA1	12	0.015836	0.074783	0.806726	183	7	-0.31314	0.58828	0.82837	0.999998	1741	3	-0.31314
SLAMF1	12	0.015865	0.074859	0.806726	184	6	-0.1988	0.63382	0.85412	0.999998	1808	3	-0.1988
COL6A6	12	0.015893	0.074973	0.806726	185	5	-0.042214	0.26302	0.56313	0.929567	1267	3	-0.042214
ABCC5	12	0.016093	0.075721	0.810457	186	4	0.20957	0.020859	0.094429	0.429789	273	6	0.20957
DummyGuide_1714	1	0.016171	0.015948	0.365616	187	1	-1.1734	0.98383	0.98401	0.999998	2244	0	-1.1734
DummyGuide_1221	1	0.016289	0.016066	0.365616	188	1	-1.3748	0.98371	0.98389	0.999998	2243	0	-1.3748
IL13RA2	12	0.017248	0.080232	0.849813	189	5	-0.12639	0.25423	0.5513	0.921057	1249	5	-0.12639
PLXND1	12	0.017312	0.080486	0.849813	190	8	-0.34147	0.73017	0.90465	0.999998	1936	2	-0.34147
LRP4	12	0.017954	0.082914	0.867641	191	8	-0.3043	0.91471	0.96953	0.999998	2138	2	-0.3043
GRIK3	12	0.018214	0.08392	0.873806	192	7	-0.33958	0.8378	0.94366	0.999998	2035	1	-0.33958
PIGS	12	0.018804	0.08623	0.880356	193	8	-0.33601	0.80854	0.93211	0.999998	2003	2	-0.33601
SEL1L	12	0.019038	0.087134	0.880356	194	8	-0.34777	0.92136	0.97118	0.999998	2149	1	-0.34777
SCARB2	12	0.01937	0.08833	0.883197	195	5	-0.10486	0.74192	0.90851	0.999998	1943	3	-0.10486
TMEM106C	12	0.019544	0.088955	0.883197	196	5	-0.044346	0.37935	0.67672	0.998769	1459	5	-0.044346
TMEM2	12	0.019612	0.089221	0.883197	197	7	-0.34843	0.89868	0.96575	0.999998	2116	2	-0.34843
MPZL1	12	0.019668	0.089512	0.883197	198	7	-0.28705	0.49194	0.77385	0.999998	1634	3	-0.28705
KIAA0319L	12	0.019722	0.089702	0.883197	199	6	-0.27752	0.27533	0.57769	0.940997	1294	3	-0.27752
CELSR2	12	0.01981	0.090028	0.883197	200	6	-0.22102	0.56628	0.81624	0.999998	1719	2	-0.22102
ATP6V0A1	12	0.020151	0.091303	0.884359	201	7	-0.38718	0.88654	0.96314	0.999998	2101	1	-0.38718
GRID1	12	0.020484	0.092537	0.888361	202	4	0.040362	0.45469	0.74369	0.999998	1566	4	0.040362
HS2ST1	12	0.020554	0.092853	0.888361	203	8	-0.37864	0.15556	0.40636	0.805474	971	1	-0.37864
DummyGuide_1390	1	0.020589	0.020581	0.429712	204	1	-1.2185	0.97941	0.97931	0.999998	2238	0	-1.2185
HEG1	12	0.020876	0.09399	0.889672	205	8	-0.33775	0.99965	0.99961	0.999998	2325	0	-0.33775
MIA3	12	0.020912	0.094129	0.889672	206	6	-0.29444	0.85865	0.95194	0.999998	2057	3	-0.29444
TMED4	12	0.021235	0.095384	0.894317	207	5	0.025542	0.25153	0.54755	0.919155	1244	4	0.025542
EPHA3	12	0.021458	0.09619	0.894723	208	5	-0.10138	0.38145	0.67879	0.998769	1464	4	-0.10138
ITGB5	12	0.022091	0.098636	0.9073	209	8	-0.22134	0.35849	0.65717	0.98807	1424	2	-0.22134
B4GALT3	12	0.022115	0.098704	0.9073	210	8	-0.34776	0.98842	0.99168	0.999998	2256	1	-0.34776
CXADR	4	0.022314	0.066952	0.785178	211	2	-0.12497	0.00035341	0.0013327	0.143134	10	2	-0.12497
P3H1	12	0.022643	0.1006	0.912745	212	5	0.030188	0.32905	0.62953	0.972388	1380	5	0.030188
NCSTN	12	0.022728	0.10085	0.912745	213	5	-0.097502	0.9892	0.99194	0.999998	2259	1	-0.097502
SLCO4C1	12	0.02361	0.10418	0.935719	214	8	-0.3604	0.4699	0.75652	0.999998	1596	3	-0.3604
ITGA10	12	0.023699	0.10446	0.935719	215	6	-0.28625	0.83562	0.94286	0.999998	2032	3	-0.28625
SELP	12	0.023774	0.10476	0.935719	216	5	-0.035447	0.26899	0.571	0.935305	1281	4	-0.035447
CD1D	12	0.023843	0.10499	0.935719	217	8	-0.24591	0.95033	0.97981	0.999998	2188	1	-0.24591
GPR176	12	0.024253	0.10639	0.937486	218	8	-0.25912	0.63353	0.85391	0.999998	1806	4	-0.25912
HMCN1	12	0.024389	0.10686	0.938128	219	7	-0.25223	0.97034	0.98745	0.999998	2230	1	-0.25223
FCRL2	12	0.024876	0.10853	0.946612	220	5	-0.1571	0.94506	0.97798	0.999998	2182	2	-0.1571
TMEM63B	12	0.025675	0.11144	0.954212	221	7	-0.30485	0.42264	0.71596	0.999998	1523	1	-0.30485
DummyGuide_1237	1	0.025773	0.025815	0.49992	222	1	-1.2015	0.97423	0.97421	0.999998	2234	0	-1.2015
MGAT5	12	0.026181	0.11323	0.954212	223	7	-0.40346	0.48549	0.76944	0.999998	1627	4	-0.40346
DummyGuide_1404	1	0.026186	0.026233	0.49992	224	1	-0.79461	0.97381	0.97385	0.999998	2233	0	-0.79461
P4HA1	12	0.026273	0.11358	0.954212	225	8	-0.22062	0.81618	0.93519	0.999998	2011	3	-0.22062
FUT11	12	0.026483	0.11427	0.954212	226	7	-0.29125	0.015093	0.072545	0.385589	216	3	-0.29125
GDPD5	12	0.026493	0.11431	0.954212	227	8	-0.23977	0.62593	0.84962	0.999998	1792	2	-0.23977
ENPEP	12	0.026521	0.11439	0.954212	228	6	-0.17444	0.54689	0.80512	0.999998	1699	2	-0.17444
PIGN	12	0.02696	0.11596	0.963505	229	7	-0.2167	0.25531	0.5526	0.921916	1253	4	-0.2167
THBS1	12	0.027232	0.11701	0.963505	230	7	-0.32267	0.21698	0.49936	0.887958	1150	4	-0.32267
DummyGuide_1934	1	0.027423	0.02739	0.509547	231	1	-0.86904	0.97258	0.97268	0.999998	2231	0	-0.86904
SEL1L3	12	0.02815	0.12023	0.980662	232	5	0.015398	0.30866	0.61015	0.959206	1355	5	0.015398
KLRC1	12	0.028227	0.12049	0.980662	233	5	0.0069562	0.12463	0.35664	0.756521	875	5	0.0069562
MMGT1	12	0.028685	0.12209	0.986804	234	8	-0.26511	0.95749	0.98231	0.999998	2199	2	-0.26511
NRP1	12	0.029061	0.12333	0.990217	235	4	-0.032482	0.72524	0.90296	0.999998	1933	3	-0.032482
F2R	12	0.029143	0.12362	0.990217	236	7	-0.32026	0.7499	0.91111	0.999998	1948	3	-0.32026
CRB2	12	0.029366	0.12445	0.992204	237	8	-0.22657	0.83266	0.94169	0.999998	2025	1	-0.22657
ECE1	12	0.02958	0.12528	0.992762	238	6	-0.15022	0.32291	0.62372	0.969487	1370	5	-0.15022
FAP	12	0.029825	0.12614	0.992762	239	3	0.038311	0.53471	0.79836	0.999998	1683	3	0.038311
SEMA4D	12	0.029967	0.12664	0.992762	240	5	-0.035629	0.25021	0.54569	0.918237	1241	4	-0.035629
HSP90AB1	12	0.029997	0.12675	0.992762	241	6	-0.17878	0.99849	0.99845	0.999998	2308	0	-0.17878
GNPTG	12	0.030363	0.12806	0.992762	242	7	-0.272	0.42527	0.71819	0.999998	1528	4	-0.272
LDLR	12	0.030365	0.12807	0.992762	243	8	-0.2715	0.9908	0.99264	0.999998	2268	1	-0.2715
DummyGuide_1410	1	0.030663	0.030702	0.52896	244	1	-1.3562	0.96934	0.96938	0.999998	2228	0	-1.3562
TMEM87B	12	0.030966	0.13015	0.996528	245	6	-0.20928	0.58085	0.82421	0.999998	1731	2	-0.20928
MFAP5	12	0.031326	0.13138	0.996528	246	8	-0.20661	0.11725	0.34439	0.74814	839	3	-0.20661
DummyGuide_1188	1	0.031429	0.031369	0.52896	247	1	-0.81122	0.96857	0.96865	0.999998	2226	0	-0.81122
RAB5C	12	0.031484	0.13187	0.996528	248	8	-0.27828	0.45652	0.74528	0.999998	1572	3	-0.27828
CELSR1	12	0.031547	0.13209	0.996528	249	8	-0.2821	0.91969	0.97069	0.999998	2147	2	-0.2821
DummyGuide_1206	1	0.031664	0.031593	0.52896	250	1	-0.89524	0.96834	0.96843	0.999998	2225	0	-0.89524
SLC39A6	12	0.031786	0.13289	0.996528	251	6	-0.26871	0.38706	0.68393	0.999998	1473	4	-0.26871
CASP7	12	0.031845	0.13307	0.996528	252	5	0.10409	0.057457	0.20584	0.581841	539	5	0.10409
CRLF1	12	0.032003	0.13366	0.996528	253	6	-0.14728	0.48125	0.76587	0.999998	1619	3	-0.14728
FAM189B	12	0.032119	0.13407	0.996528	254	8	-0.23021	0.13598	0.37549	0.777163	912	2	-0.23021
DummyGuide_1285	1	0.032194	0.032117	0.531132	255	1	-0.85363	0.96781	0.96795	0.999998	2222	0	-0.85363
MFAP3	12	0.032215	0.1344	0.996528	256	4	0.019259	0.45601	0.74484	0.999998	1569	2	0.019259
DummyGuide_1421	1	0.032253	0.032176	0.531132	257	1	-0.6916	0.96775	0.9679	0.999998	2221	0	-0.6916
NOCT	12	0.032366	0.13488	0.996528	258	7	-0.31868	0.96903	0.98689	0.999998	2227	1	-0.31868
MCOLN1	12	0.032699	0.13597	0.999084	259	8	-0.24461	0.52437	0.79269	0.999998	1669	3	-0.24461
DummyGuide_1892	1	0.032901	0.032839	0.538288	260	1	-1.0372	0.9671	0.96725	0.999998	2220	0	-1.0372
TRHDE	12	0.03329	0.13812	0.999981	261	7	-0.31644	0.46186	0.74975	0.999998	1580	4	-0.31644
SLAMF7	12	0.033292	0.13812	0.999981	262	6	-0.19657	0.85815	0.95176	0.999998	2055	2	-0.19657
TSPAN15	12	0.033527	0.1388	0.999981	263	6	-0.19056	0.25831	0.5567	0.924816	1259	4	-0.19056
DPP7	12	0.033759	0.13955	0.999981	264	7	-0.26623	0.67165	0.87515	0.999998	1863	2	-0.26623
MBTPS2	12	0.034087	0.14049	0.999981	265	7	-0.28605	0.55833	0.81175	0.999998	1709	2	-0.28605
CLEC5A	12	0.034953	0.14304	0.999981	266	4	0.24467	0.024086	0.10618	0.447604	300	7	0.24467
IL1R2	12	0.03515	0.14359	0.999981	267	7	-0.28693	0.77756	0.92113	0.999998	1975	2	-0.28693
TEN1	12	0.035698	0.1451	0.999981	268	6	-0.29236	0.26372	0.56398	0.930313	1268	2	-0.29236
NEU1	12	0.035805	0.14538	0.999981	269	7	-0.28838	0.26207	0.56208	0.929139	1266	2	-0.28838
CD1C	12	0.036018	0.14605	0.999981	270	7	-0.25352	0.031008	0.13046	0.476304	368	1	-0.25352
DummyGuide_1982	1	0.036082	0.035885	0.560759	271	1	-0.94698	0.96392	0.9641	0.999998	2214	0	-0.94698
FLT3	12	0.036296	0.1468	0.999981	272	6	-0.24476	0.68929	0.88491	0.999998	1893	3	-0.24476
ABCA5	12	0.036619	0.14778	0.999981	273	5	-0.012843	0.22653	0.51316	0.896302	1176	4	-0.012843
NCLN	12	0.036669	0.1479	0.999981	274	5	-0.12457	0.92479	0.97206	0.999998	2150	2	-0.12457
LAMP2	12	0.037083	0.14905	0.999981	275	5	-0.075002	0.9027	0.96671	0.999998	2121	2	-0.075002
SLC9A1	12	0.038536	0.15299	0.999981	276	7	-0.17299	0.44406	0.73428	0.999998	1554	3	-0.17299
ERLIN1	12	0.038642	0.15328	0.999981	277	5	-0.070641	0.86336	0.95385	0.999998	2064	2	-0.070641
DummyGuide_1046	1	0.039794	0.039729	0.586618	278	1	-0.79467	0.96021	0.96031	0.999998	2207	0	-0.79467
CMKLR1	12	0.039799	0.15653	0.999981	279	6	-0.17389	0.083242	0.26861	0.659978	682	5	-0.17389
FKBP7	12	0.040102	0.15739	0.999981	280	7	-0.27689	0.84123	0.94502	0.999998	2042	3	-0.27689
KCNK17	12	0.040609	0.15892	0.999981	281	7	-0.26797	0.52193	0.79131	0.999998	1667	3	-0.26797
EPCAM	12	0.041002	0.15995	0.999981	282	6	-0.25324	0.94374	0.97759	0.999998	2181	2	-0.25324
DummyGuide_1909	1	0.041031	0.040911	0.59935	283	1	-0.8553	0.95897	0.9591	0.999998	2204	0	-0.8553
TMEM131	12	0.04119	0.16046	0.999981	284	5	-0.021323	0.76658	0.91717	0.999998	1964	3	-0.021323
DummyGuide_1554	1	0.041561	0.041532	0.601379	285	1	-1.0719	0.95844	0.95855	0.999998	2202	0	-1.0719
DummyGuide_1299	1	0.041797	0.041765	0.601379	286	1	-1.0125	0.9582	0.95829	0.999998	2201	0	-1.0125
TMEFF1	12	0.041956	0.16249	0.999981	287	7	-0.30054	0.71437	0.89883	0.999998	1921	3	-0.30054
TYRO3	12	0.042713	0.1645	0.999981	288	7	-0.30036	0.5434	0.80321	0.999998	1695	3	-0.30036
DNASE1L1	12	0.04295	0.16516	0.999981	289	7	-0.23928	0.60197	0.83622	0.999998	1760	3	-0.23928
GPNMB	12	0.042958	0.16518	0.999981	290	6	-0.16157	0.087801	0.27924	0.671769	704	4	-0.16157
DummyGuide_1441	1	0.043034	0.043078	0.608285	291	1	-0.86352	0.95697	0.95707	0.999998	2198	0	-0.86352
CSF2RB	12	0.043299	0.16611	0.999981	292	3	0.083525	0.46801	0.75499	0.999998	1595	5	0.083525
DummyGuide_1987	1	0.043682	0.043703	0.613417	293	1	-0.97186	0.95632	0.9564	0.999998	2197	0	-0.97186
DummyGuide_1964	1	0.044153	0.04421	0.616838	294	1	-0.92594	0.95585	0.95584	0.999998	2196	0	-0.92594
PCDH19	12	0.044267	0.16896	0.999981	295	6	-0.25174	0.17914	0.44316	0.843155	1037	3	-0.25174
BSCL2	12	0.044284	0.169	0.999981	296	7	-0.28831	0.93907	0.97617	0.999998	2168	2	-0.28831
MRGPRF	12	0.044377	0.16928	0.999981	297	4	-0.0036735	0.29199	0.59413	0.952672	1321	4	-0.0036735
RET	12	0.045054	0.17095	0.999981	298	5	-0.020991	0.56639	0.81631	0.999998	1720	4	-0.020991
B4GALT5	12	0.04513	0.17113	0.999981	299	7	-0.2716	0.26952	0.57169	0.935757	1282	2	-0.2716
SLCO4A1	12	0.045333	0.17164	0.999981	300	6	-0.17251	0.9413	0.97684	0.999998	2174	2	-0.17251
AMIGO2	12	0.045346	0.17169	0.999981	301	4	0.12239	0.43657	0.72793	0.999998	1540	5	0.12239
CPD	12	0.045988	0.17338	0.999981	302	7	-0.29317	0.97965	0.98932	0.999998	2239	1	-0.29317
CLN5	12	0.046115	0.17366	0.999981	303	5	-0.098403	0.23983	0.53136	0.909788	1209	2	-0.098403
NEO1	12	0.047041	0.17629	0.999981	304	7	-0.26675	0.58623	0.82721	0.999998	1738	4	-0.26675
CNTN3	12	0.047319	0.17708	0.999981	305	4	0.14272	0.23721	0.52779	0.906325	1205	6	0.14272
ADAMTSL4	12	0.047397	0.1773	0.999981	306	7	-0.23783	0.29508	0.59708	0.953933	1327	2	-0.23783
DummyGuide_1353	1	0.049573	0.049803	0.678707	307	1	-0.9658	0.95043	0.95048	0.999998	2189	0	-0.9658
CES1	12	0.049872	0.18414	0.999981	308	7	-0.22955	0.16775	0.4255	0.8251	1008	4	-0.22955
PI16	12	0.049968	0.1844	0.999981	309	7	-0.26063	0.96087	0.98352	0.999998	2209	2	-0.26063
OSTM1	12	0.049975	0.18443	0.999981	310	7	-0.30343	0.9807	0.98953	0.999998	2241	1	-0.30343
SEMA4F	12	0.049976	0.18443	0.999981	311	5	-0.0087048	0.1507	0.39868	0.796853	957	5	-0.0087048
KLRB1	12	0.050082	0.18469	0.999981	312	6	-0.21162	0.77635	0.92079	0.999998	1974	3	-0.21162
DSG2	12	0.050659	0.18629	0.999981	313	6	-0.15954	0.41193	0.70644	0.999998	1505	4	-0.15954
IGSF8	12	0.051233	0.18771	0.999981	314	7	-0.2723	0.86024	0.95264	0.999998	2059	2	-0.2723
KIDINS220	12	0.051413	0.18823	0.999981	315	3	0.22425	0.045311	0.17432	0.546328	466	7	0.22425
PECAM1	12	0.0516	0.18871	0.999981	316	6	0.029514	0.0037861	0.022376	0.250959	80	6	0.029514
CD58	12	0.051651	0.18884	0.999981	317	3	0.1016	0.70485	0.89355	0.999998	1908	4	0.1016
HSPG2	12	0.051677	0.1889	0.999981	318	7	-0.21183	0.66259	0.87009	0.999998	1851	3	-0.21183
SEMA4C	12	0.052472	0.19091	0.999981	319	7	-0.23409	0.8847	0.96245	0.999998	2098	2	-0.23409
MCEMP1	12	0.053124	0.19264	0.999981	320	7	-0.22904	0.94809	0.97901	0.999998	2186	2	-0.22904
MERTK	12	0.053376	0.19341	0.999981	321	7	-0.28309	0.96233	0.98416	0.999998	2211	1	-0.28309
WNT11	12	0.053422	0.19352	0.999981	322	7	-0.19833	0.75089	0.91145	0.999998	1950	2	-0.19833
LAIR1	12	0.053519	0.19376	0.999981	323	5	0.068479	0.17887	0.44274	0.843076	1035	5	0.068479
CXCR3	12	0.054676	0.19664	0.999981	324	5	-0.03844	0.22408	0.50959	0.892728	1171	4	-0.03844
TNFRSF17	12	0.055218	0.19808	0.999981	325	7	-0.23099	0.61348	0.84267	0.999998	1778	3	-0.23099
PLAU	12	0.056156	0.20057	0.999981	326	7	-0.2255	0.96463	0.98508	0.999998	2216	2	-0.2255
LAMB2	12	0.056283	0.20081	0.999981	327	6	-0.26715	0.94968	0.97955	0.999998	2187	2	-0.26715
DummyGuide_1703	1	0.056583	0.05654	0.728675	328	1	-0.6846	0.94342	0.9434	0.999998	2180	0	-0.6846
DummyGuide_1538	1	0.056642	0.056578	0.728675	329	1	-1.0346	0.94336	0.94334	0.999998	2179	0	-1.0346
DummyGuide_1173	1	0.057349	0.057343	0.734486	330	1	-0.64475	0.94265	0.94273	0.999998	2177	0	-0.64475
TMEM30A	12	0.057457	0.20369	0.999981	331	5	-0.098852	0.45579	0.74464	0.999998	1567	4	-0.098852
DummyGuide_1099	1	0.058645	0.058652	0.747175	332	1	-0.88903	0.94135	0.94144	0.999998	2175	0	-0.88903
PTBP1	12	0.058839	0.20718	0.999981	333	6	-0.17303	0.4083	0.70314	0.999998	1498	5	-0.17303
CALR	12	0.059464	0.20872	0.999981	334	5	-0.055746	0.96106	0.9836	0.999998	2210	2	-0.055746
DummyGuide_1561	1	0.059529	0.059556	0.754589	335	1	-0.73521	0.94047	0.94049	0.999998	2171	0	-0.73521
SEMA4A	12	0.060657	0.21188	0.999981	336	6	-0.070549	0.48703	0.77059	0.999998	1629	3	-0.070549
DummyGuide_1495	1	0.060766	0.060815	0.762297	337	1	-0.70249	0.93923	0.93923	0.999998	2169	0	-0.70249
ITGA5	12	0.06096	0.21272	0.999981	338	7	-0.25342	0.43155	0.72365	0.999998	1533	3	-0.25342
CD160	12	0.06143	0.21398	0.999981	339	6	-0.14754	0.99533	0.99521	0.999998	2288	1	-0.14754
OLFML2A	12	0.061966	0.2154	0.999981	340	7	-0.22124	0.67436	0.87666	0.999998	1866	3	-0.22124
FCGR3A	12	0.062133	0.21579	0.999981	341	7	-0.23352	0.70639	0.89439	0.999998	1911	3	-0.23352
NPR2	12	0.062694	0.21728	0.999981	342	6	-0.21425	0.6693	0.87379	0.999998	1859	3	-0.21425
ARSB	12	0.06278	0.21747	0.999981	343	5	-0.073839	0.39154	0.68796	0.999998	1480	4	-0.073839
EPHB2	12	0.0628	0.21751	0.999981	344	4	0.065864	0.24104	0.53329	0.911769	1210	6	0.065864
ICAM1	12	0.062926	0.21784	0.999981	345	7	-0.23871	0.60382	0.83724	0.999998	1763	3	-0.23871
C3	12	0.062995	0.21806	0.999981	346	7	-0.22734	0.95513	0.9814	0.999998	2192	2	-0.22734
LILRB1	12	0.063968	0.2207	0.999981	347	5	-0.14072	0.34997	0.64909	0.982221	1415	3	-0.14072
POMT1	12	0.064069	0.22092	0.999981	348	7	-0.23072	0.94278	0.97727	0.999998	2178	2	-0.23072
MXRA5	12	0.064127	0.22105	0.999981	349	3	0.33858	0.012756	0.063505	0.356282	191	8	0.33858
DummyGuide_1790	1	0.064477	0.064532	0.785178	350	1	-0.73083	0.93552	0.93555	0.999998	2164	0	-0.73083
PPT2	12	0.064668	0.22248	0.999981	351	5	-0.09809	0.56391	0.81485	0.999998	1716	4	-0.09809
SLC6A15	12	0.064796	0.22286	0.999981	352	5	0.12918	0.13081	0.36697	0.769386	894	6	0.12918
LY75	12	0.065372	0.22423	0.999981	353	4	0.0016727	0.50103	0.77904	0.999998	1648	4	0.0016727
TLR4	12	0.065469	0.2245	0.999981	354	5	-0.004239	0.87978	0.96049	0.999998	2089	3	-0.004239
DummyGuide_1768	1	0.06648	0.066618	0.785178	355	1	-0.68408	0.93352	0.93362	0.999998	2161	0	-0.68408
MPHOSPH9	12	0.066623	0.2274	0.999981	356	3	0.038285	0.68605	0.88334	0.999998	1886	4	0.038285
TSPAN2	12	0.066753	0.22768	0.999981	357	7	-0.19633	0.84932	0.94823	0.999998	2049	2	-0.19633
RYR3	12	0.066789	0.22778	0.999981	358	4	0.0095207	0.71589	0.89969	0.999998	1923	4	0.0095207
ST3GAL5	12	0.067228	0.22885	0.999981	359	7	-0.24414	0.83977	0.94447	0.999998	2039	3	-0.24414
DummyGuide_1002	1	0.067835	0.06786	0.785178	360	1	-0.58521	0.93216	0.93227	0.999998	2158	0	-0.58521
CD200	12	0.068065	0.23095	0.999981	361	5	-0.098098	0.99033	0.99241	0.999998	2263	1	-0.098098
VIPR1	12	0.068761	0.23256	0.999981	362	6	-0.15652	0.48524	0.7692	0.999998	1626	4	-0.15652
ST6GALNAC3	12	0.069321	0.23393	0.999981	363	7	-0.22087	0.98901	0.99188	0.999998	2257	1	-0.22087
PLXNC1	12	0.069676	0.23475	0.999981	364	7	-0.27195	0.86095	0.95292	0.999998	2060	1	-0.27195
MGAT4B	12	0.069919	0.23531	0.999981	365	6	-0.16075	0.37224	0.67014	0.994811	1448	4	-0.16075
PCDHGB4	12	0.069937	0.23537	0.999981	366	6	-0.067177	0.66705	0.87256	0.999998	1857	3	-0.067177
COL11A1	12	0.070125	0.23591	0.999981	367	7	-0.21623	0.7937	0.92667	0.999998	1988	3	-0.21623
TBXA2R	12	0.070267	0.23624	0.999981	368	5	-0.12251	0.93112	0.97385	0.999998	2156	2	-0.12251
CPM	12	0.070725	0.23754	0.999981	369	5	-0.15318	0.83673	0.9433	0.999998	2033	3	-0.15318
CGN	12	0.070739	0.23759	0.999981	370	7	-0.20256	0.99994	0.99995	0.999998	2331	0	-0.20256
TMEM26	12	0.070924	0.23818	0.999981	371	7	-0.22609	0.65811	0.86769	0.999998	1846	3	-0.22609
TOR1AIP2	12	0.071517	0.23962	0.999981	372	6	-0.13728	0.28734	0.58939	0.950151	1312	2	-0.13728
CD22	12	0.072229	0.24144	0.999981	373	7	-0.2102	0.34662	0.64586	0.979234	1410	3	-0.2102
MAN2A2	12	0.072595	0.24222	0.999981	374	6	-0.19949	0.66008	0.86877	0.999998	1848	3	-0.19949
ITGA9	12	0.073108	0.24337	0.999981	375	7	-0.23644	0.86227	0.95342	0.999998	2063	3	-0.23644
CD6	12	0.07336	0.24403	0.999981	376	7	-0.18401	0.99356	0.99401	0.999998	2280	1	-0.18401
EDEM3	12	0.073402	0.24414	0.999981	377	7	-0.1874	0.95515	0.98141	0.999998	2193	2	-0.1874
DummyGuide_1466	1	0.073432	0.073546	0.806726	378	1	-0.54357	0.92657	0.92692	0.999998	2153	0	-0.54357
SEMA6B	12	0.073749	0.24495	0.999981	379	6	-0.2148	0.089453	0.28292	0.674672	710	3	-0.2148
PLXNB1	12	0.074312	0.24647	0.999981	380	7	-0.21048	0.91509	0.96963	0.999998	2140	2	-0.21048
HEXA	12	0.074657	0.24726	0.999981	381	6	-0.17807	0.164	0.41954	0.820176	994	4	-0.17807
GGT7	12	0.074683	0.24734	0.999981	382	5	-0.090113	0.58874	0.82859	0.999998	1743	3	-0.090113
CD14	12	0.074797	0.24767	0.999981	383	6	-0.095155	0.33609	0.63601	0.976281	1392	5	-0.095155
DummyGuide_1624	1	0.074963	0.075028	0.806726	384	1	-0.62289	0.92504	0.92551	0.999998	2151	0	-0.62289
UGGT2	12	0.075925	0.25042	0.999981	385	6	-0.22296	0.2096	0.48869	0.8798	1134	4	-0.22296
ADCY6	12	0.076176	0.25096	0.999981	386	7	-0.23951	0.61636	0.84427	0.999998	1782	4	-0.23951
PTK7	12	0.076306	0.25119	0.999981	387	7	-0.21695	0.99272	0.99353	0.999998	2277	1	-0.21695
LUM	12	0.076422	0.25148	0.999981	388	6	-0.12077	0.15654	0.40785	0.807437	974	5	-0.12077
NRCAM	12	0.076693	0.25221	0.999981	389	4	-0.033602	0.21302	0.4936	0.885907	1138	5	-0.033602
CLEC2B	12	0.077956	0.25515	0.999981	390	3	0.24509	0.021672	0.097508	0.435251	280	7	0.24509
ERO1B	12	0.07816	0.25564	0.999981	391	6	-0.12111	0.1373	0.37739	0.777163	916	4	-0.12111
PLXNB2	12	0.078662	0.25677	0.999981	392	6	-0.13151	0.88372	0.96208	0.999998	2097	2	-0.13151
HLA-F	12	0.078757	0.25703	0.999981	393	7	-0.21567	0.38462	0.68153	0.999693	1469	3	-0.21567
JAM2	12	0.07919	0.25812	0.999981	394	6	-0.064119	0.46634	0.75357	0.999998	1592	2	-0.064119
RPL37A	4	0.079315	0.17817	0.999981	395	3	-0.35313	0.3599	0.50778	0.892078	1426	1	-0.35313
TXNDC15	12	0.079399	0.25865	0.999981	396	7	-0.2462	0.89588	0.96505	0.999998	2115	2	-0.2462
DummyGuide_1679	1	0.079676	0.079962	0.849813	397	1	-0.5319	0.92032	0.9208	0.999998	2148	0	-0.5319
GDF15	12	0.079801	0.25963	0.999981	398	3	-0.010786	0.70651	0.89445	0.999998	1912	3	-0.010786
PCDHGA12	12	0.080351	0.2609	0.999981	399	6	-0.025664	0.28515	0.5873	0.949012	1306	5	-0.025664
TOR1B	12	0.08044	0.26109	0.999981	400	6	-0.20629	0.66014	0.86882	0.999998	1849	3	-0.20629
LMNA	12	0.080628	0.26152	0.999981	401	6	-0.14788	0.90017	0.9661	0.999998	2119	2	-0.14788
ADAM19	12	0.081282	0.26293	0.999981	402	3	-0.05136	0.35642	0.65527	0.987112	1421	4	-0.05136
DummyGuide_1919	1	0.081384	0.081681	0.858567	403	1	-0.61952	0.91862	0.91911	0.999998	2145	0	-0.61952
SLC7A5	12	0.081689	0.26383	0.999981	404	7	-0.18208	0.20602	0.48348	0.875282	1126	3	-0.18208
APOD	12	0.082197	0.26496	0.999981	405	6	-0.10216	0.59834	0.83412	0.999998	1754	3	-0.10216
HTR1D	12	0.082303	0.2652	0.999981	406	7	-0.19217	0.96961	0.9871	0.999998	2229	1	-0.19217
TLR3	12	0.082625	0.26608	0.999981	407	7	-0.22309	0.57511	0.82096	0.999998	1729	4	-0.22309
FAS	12	0.083895	0.26917	0.999981	408	3	0.10578	0.35725	0.65601	0.987597	1422	5	0.10578
DummyGuide_1742	1	0.083976	0.084249	0.873806	409	1	-0.50992	0.91602	0.91646	0.999998	2142	0	-0.50992
DummyGuide_1939	1	0.084801	0.085039	0.878113	410	1	-0.68155	0.9152	0.91571	0.999998	2141	0	-0.68155
EPX	12	0.085012	0.27175	0.999981	411	6	-0.19588	0.25778	0.55596	0.924229	1257	3	-0.19588
SIGLEC6	12	0.085199	0.27218	0.999981	412	1	0.20337	0.023615	0.10461	0.446127	293	8	0.20337
P2RX4	12	0.085422	0.27269	0.999981	413	2	0.13009	0.19786	0.47159	0.869034	1096	5	0.13009
NAAA	12	0.085424	0.2727	0.999981	414	7	-0.2439	0.68851	0.88452	0.999998	1891	2	-0.2439
TOR3A	12	0.08585	0.27366	0.999981	415	5	-0.025503	0.20503	0.48199	0.874456	1118	5	-0.025503
DummyGuide_1114	1	0.08592	0.086053	0.880356	416	1	-0.5059	0.91408	0.91461	0.999998	2137	0	-0.5059
TMEM104	12	0.086474	0.27518	0.999981	417	7	-0.1935	0.67965	0.87978	0.999998	1875	2	-0.1935
SUSD1	12	0.086545	0.27534	0.999981	418	7	-0.16941	0.13536	0.37452	0.777163	909	3	-0.16941
CLCN6	12	0.086686	0.27574	0.999981	419	7	-0.18034	0.66743	0.87276	0.999998	1858	4	-0.18034
DummyGuide_1510	1	0.086922	0.086906	0.880356	420	1	-0.47374	0.91308	0.91359	0.999998	2136	0	-0.47374
DummyGuide_1947	1	0.08704	0.087046	0.880356	421	1	-0.62355	0.91296	0.9135	0.999998	2135	0	-0.62355
TSPAN6	12	0.088677	0.28028	0.999981	422	6	-0.12805	0.66654	0.87225	0.999998	1855	4	-0.12805
TSPAN1	12	0.088828	0.28063	0.999981	423	7	-0.23004	0.94169	0.97695	0.999998	2176	2	-0.23004
LOXL4	12	0.088834	0.28064	0.999981	424	6	-0.15611	0.12017	0.34931	0.749796	855	3	-0.15611
MUC16	12	0.088939	0.28088	0.999981	425	5	-0.093508	0.68429	0.88244	0.999998	1881	2	-0.093508
LRFN1	12	0.089442	0.28209	0.999981	426	6	-0.22777	0.73237	0.90532	0.999998	1937	3	-0.22777
DummyGuide_1835	1	0.090044	0.090053	0.883197	427	1	-0.61806	0.90996	0.91044	0.999998	2134	0	-0.61806
TMED7	12	0.090264	0.28403	0.999981	428	3	0.16546	0.046687	0.17792	0.550504	475	6	0.16546
TNFRSF8	12	0.090348	0.28421	0.999981	429	7	-0.23007	0.18943	0.45873	0.856511	1077	3	-0.23007
NPTN	12	0.090525	0.28458	0.999981	430	5	-0.03277	0.80446	0.93065	0.999998	1998	3	-0.03277
DummyGuide_1997	1	0.090633	0.090678	0.884359	431	1	-0.6088	0.90937	0.90989	0.999998	2131	0	-0.6088
DummyGuide_1932	1	0.091163	0.091236	0.884359	432	1	-0.5829	0.90884	0.90936	0.999998	2129	0	-0.5829
NPR1	12	0.091168	0.28609	0.999981	433	7	-0.17765	0.88027	0.96066	0.999998	2090	2	-0.17765
IL2RA	12	0.09144	0.28665	0.999981	434	6	-0.18018	0.36827	0.66616	0.994811	1437	5	-0.18018
RPS15A	1	0.09187	0.091962	0.887076	435	1	-1.4187	0.90813	0.90866	0.999998	2128	0	-1.4187
TSPAN14	12	0.09203	0.28795	0.999981	436	6	-0.11584	0.27323	0.57584	0.938649	1291	4	-0.11584
SORCS2	12	0.092562	0.28901	0.999981	437	6	-0.12007	0.71422	0.89875	0.999998	1920	3	-0.12007
TM9SF1	12	0.092677	0.2893	0.999981	438	3	0.12421	0.44508	0.73533	0.999998	1555	5	0.12421
FCAR	12	0.092986	0.29004	0.999981	439	4	0.30713	0.0071708	0.039243	0.299064	127	7	0.30713
DummyGuide_1732	1	0.093284	0.093453	0.889672	440	1	-0.72535	0.90672	0.90715	0.999998	2125	0	-0.72535
LRP1	12	0.094261	0.29322	0.999981	441	6	-0.2073	0.86907	0.95611	0.999998	2074	2	-0.2073
DummyGuide_1268	1	0.094521	0.094729	0.891745	442	1	-0.56147	0.90548	0.90598	0.999998	2124	0	-0.56147
LRRC4B	12	0.094991	0.29494	0.999981	443	4	-0.077786	0.47716	0.76257	0.999998	1610	4	-0.077786
IGDCC4	12	0.094995	0.29495	0.999981	444	7	-0.2468	0.1058	0.31973	0.717864	787	3	-0.2468
TMEM8A	12	0.095163	0.29535	0.999981	445	7	-0.21257	0.99074	0.9926	0.999998	2267	1	-0.21257
BCAN	12	0.095486	0.29611	0.999981	446	6	-0.15568	0.39122	0.68763	0.999998	1479	5	-0.15568
DummyGuide_1542	1	0.095876	0.095992	0.894723	447	1	-0.63764	0.90412	0.9046	0.999998	2123	0	-0.63764
DummyGuide_1419	1	0.097172	0.097268	0.901166	448	1	-0.51841	0.90283	0.90329	0.999998	2122	0	-0.51841
CD36	12	0.097967	0.30194	0.999981	449	6	-0.17058	0.097395	0.30113	0.694632	747	4	-0.17058
EMB	12	0.097978	0.30197	0.999981	450	7	-0.20142	0.65684	0.86687	0.999998	1841	3	-0.20142
C1orf159	12	0.098132	0.3024	0.999981	451	3	0.15047	0.23476	0.52439	0.903804	1197	6	0.15047
EMP2	12	0.098286	0.30273	0.999981	452	7	-0.16423	0.69701	0.88929	0.999998	1897	3	-0.16423
EXOC4	12	0.098457	0.3031	0.999981	453	6	-0.1328	0.98991	0.99225	0.999998	2261	1	-0.1328
DummyGuide_1821	1	0.098881	0.099143	0.907778	454	1	-0.49954	0.90112	0.90168	0.999998	2120	0	-0.49954
ABCC1	12	0.099475	0.30558	0.999981	455	6	-0.031328	0.17974	0.44396	0.843496	1039	6	-0.031328
STT3B	12	0.099523	0.30571	0.999981	456	7	-0.19376	0.77856	0.92149	0.999998	1976	3	-0.19376
ELFN2	12	0.1004	0.3076	0.999981	457	6	-0.073215	0.48318	0.7675	0.999998	1623	4	-0.073215
DummyGuide_1842	1	0.10041	0.10078	0.912745	458	1	-0.45471	0.89959	0.90002	0.999998	2118	0	-0.45471
ANTXR1	12	0.10077	0.30842	0.999981	459	7	-0.16683	0.36084	0.65928	0.988715	1428	4	-0.16683
IDH2	12	0.10127	0.30958	0.999981	460	6	-0.1304	0.87844	0.95992	0.999998	2085	3	-0.1304
PLOD2	12	0.10159	0.31032	0.999981	461	5	0.14811	0.19024	0.45989	0.856959	1081	6	0.14811
PIGT	12	0.10216	0.31158	0.999981	462	5	-0.017803	0.21264	0.49317	0.885812	1137	5	-0.017803
GLT8D1	12	0.10284	0.31299	0.999981	463	6	-0.17429	0.96079	0.9835	0.999998	2208	2	-0.17429
SLC39A10	12	0.10368	0.31483	0.999981	464	5	-0.093759	0.93484	0.97492	0.999998	2163	2	-0.093759
IL17RB	12	0.10393	0.31551	0.999981	465	7	-0.22739	0.84512	0.94646	0.999998	2044	3	-0.22739
SEMA5A	12	0.10445	0.31663	0.999981	466	6	-0.17124	0.11344	0.33615	0.738728	820	3	-0.17124
PTPRA	12	0.10494	0.31735	0.999981	467	6	-0.14403	0.71286	0.89791	0.999998	1917	4	-0.14403
ENPP1	12	0.10523	0.31789	0.999981	468	5	0.037693	0.44323	0.73355	0.999998	1551	4	0.037693
DummyGuide_1852	1	0.10554	0.1058	0.937486	469	1	-0.859	0.89446	0.89483	0.999998	2113	0	-0.859
DummyGuide_1888	1	0.10601	0.10629	0.937486	470	1	-0.58652	0.89399	0.89434	0.999998	2112	0	-0.58652
GRIA2	12	0.10615	0.31956	0.999981	471	3	0.11009	0.5103	0.78459	0.999998	1657	4	0.11009
FLRT2	12	0.10641	0.31999	0.999981	472	5	-0.057073	0.60672	0.83887	0.999998	1768	4	-0.057073
SLC29A1	12	0.10711	0.32119	0.999981	473	6	-0.18795	0.81712	0.93555	0.999998	2012	2	-0.18795
PDGFRA	12	0.10767	0.32214	0.999981	474	6	-0.21735	0.70001	0.891	0.999998	1902	2	-0.21735
LZTFL1	12	0.10774	0.32224	0.999981	475	5	0.029908	0.11485	0.33915	0.741002	827	5	0.029908
OSMR	12	0.10794	0.32256	0.999981	476	6	-0.16081	0.063466	0.22125	0.604785	586	4	-0.16081
DummyGuide_1991	1	0.10837	0.10863	0.946612	477	1	-0.37824	0.89163	0.89201	0.999998	2110	0	-0.37824
VCAN	12	0.1091	0.32459	0.999981	478	5	-0.08182	0.74449	0.90932	0.999998	1945	3	-0.08182
FBN1	12	0.10928	0.32498	0.999981	479	6	-0.14842	0.82437	0.93833	0.999998	2020	1	-0.14842
THRB	12	0.10942	0.32523	0.999981	480	6	-0.15842	0.27665	0.57888	0.941642	1296	3	-0.15842
DummyGuide_1901	1	0.10943	0.10984	0.953594	481	1	-0.5922	0.89057	0.89085	0.999998	2107	0	-0.5922
RPL27A	4	0.10969	0.23154	0.999981	482	2	-0.11998	0.053445	0.13069	0.476331	511	2	-0.11998
IL18R1	12	0.10998	0.32616	0.999981	483	6	-0.21295	0.12728	0.36111	0.762568	884	2	-0.21295
DummyGuide_1535	1	0.11013	0.11051	0.954212	484	1	-0.49524	0.88987	0.89021	0.999998	2105	0	-0.49524
DummyGuide_1475	1	0.11149	0.11175	0.954212	485	1	-0.4761	0.88851	0.88884	0.999998	2104	0	-0.4761
SERPINH1	12	0.1116	0.3292	0.999981	486	6	-0.21199	0.13538	0.37455	0.777163	910	4	-0.21199
DummyGuide_1316	1	0.11166	0.11195	0.954212	487	1	-0.4486	0.88834	0.8887	0.999998	2103	0	-0.4486
ACTB	10	0.11177	0.31747	0.999981	488	5	-0.16711	0.7925	0.91785	0.999998	1986	2	-0.16711
NTRK1	12	0.11202	0.32991	0.999981	489	6	-0.14537	0.65704	0.86704	0.999998	1842	4	-0.14537
CELSR3	12	0.1123	0.3303	0.999981	490	6	-0.090344	0.17889	0.44276	0.843076	1036	3	-0.090344
DummyGuide_1443	1	0.11308	0.11329	0.954212	491	1	-0.47455	0.88692	0.88726	0.999998	2102	0	-0.47455
ATRX	12	0.11321	0.33193	0.999981	492	4	-0.15554	0.2018	0.47744	0.87339	1106	3	-0.15554
ATP1A3	12	0.11324	0.33198	0.999981	493	6	-0.17672	0.54137	0.80209	0.999998	1690	3	-0.17672
FGFR2	12	0.11367	0.33263	0.999981	494	6	-0.14151	0.47423	0.76011	0.999998	1605	3	-0.14151
DummyGuide_1008	1	0.11378	0.11396	0.954212	495	1	-0.51001	0.88622	0.88658	0.999998	2100	0	-0.51001
HLA-DQB1	12	0.11409	0.3333	0.999981	496	2	0.34645	0.0028709	0.01784	0.230416	62	7	0.34645
ICAM3	12	0.11479	0.33453	0.999981	497	6	-0.16226	0.57476	0.8208	0.999998	1727	4	-0.16226
GPM6B	12	0.11489	0.33469	0.999981	498	4	0.35668	0.0043803	0.025435	0.264851	86	7	0.35668
DummyGuide_1655	1	0.11655	0.11671	0.963505	499	1	-0.50879	0.88345	0.88364	0.999998	2096	0	-0.50879
TYRP1	12	0.11662	0.33771	0.999981	500	5	-0.11448	0.20207	0.47783	0.87339	1107	4	-0.11448
ADRB2	12	0.11681	0.33806	0.999981	501	4	-0.038779	0.24851	0.54335	0.916925	1235	5	-0.038779
DummyGuide_1681	1	0.11697	0.11715	0.963505	502	1	-0.5842	0.88303	0.88329	0.999998	2095	0	-0.5842
SEMA3A	12	0.1183	0.3406	0.999981	503	3	0.016557	0.043307	0.16898	0.539254	452	5	0.016557
DummyGuide_1257	1	0.11832	0.11856	0.971699	504	1	-0.51805	0.88168	0.882	0.999998	2092	0	-0.51805
FCRL5	12	0.11847	0.34084	0.999981	505	6	-0.10009	0.70234	0.89224	0.999998	1906	3	-0.10009
LRRC15	12	0.11975	0.34307	0.999981	506	4	-0.013966	0.68194	0.88127	0.999998	1878	3	-0.013966
PTPRS	12	0.12001	0.34359	0.999981	507	6	-0.155	0.54627	0.80479	0.999998	1697	4	-0.155
LTB	12	0.12012	0.34378	0.999981	508	4	0.19185	0.073423	0.24562	0.63535	631	7	0.19185
DummyGuide_1560	1	0.12144	0.12164	0.986553	509	1	-0.55766	0.87856	0.87869	0.999998	2086	0	-0.55766
VCAM1	12	0.1221	0.34717	0.999981	510	6	-0.11389	0.3045	0.60629	0.957419	1349	5	-0.11389
DummyGuide_1676	1	0.12351	0.12378	0.990217	511	1	-0.43952	0.87649	0.87669	0.999998	2081	0	-0.43952
GBA	12	0.12369	0.34988	0.999981	512	4	-0.070511	0.29746	0.59946	0.953933	1333	4	-0.070511
SLC2A1	12	0.1244	0.35105	0.999981	513	5	-0.11397	0.69762	0.88966	0.999998	1898	4	-0.11397
SLC23A2	12	0.12478	0.35165	0.999981	514	3	0.038478	0.37132	0.66927	0.994811	1446	5	0.038478
DummyGuide_1652	1	0.12563	0.12583	0.992762	515	1	-0.51248	0.87437	0.87457	0.999998	2079	0	-0.51248
MCAM	12	0.12653	0.35475	0.999981	516	4	-0.0022294	0.45616	0.74493	0.999998	1570	4	-0.0022294
DummyGuide_1212	1	0.12716	0.12728	0.992762	517	1	-0.48692	0.87284	0.873	0.999998	2078	0	-0.48692
FKBP14	12	0.12728	0.35603	0.999981	518	3	0.063944	0.68268	0.88165	0.999998	1879	4	0.063944
NTSR1	12	0.12771	0.35681	0.999981	519	4	0.081553	0.18064	0.44539	0.844382	1044	4	0.081553
DummyGuide_1346	1	0.12822	0.12833	0.992762	520	1	-0.37189	0.87178	0.87193	0.999998	2077	0	-0.37189
PLXDC1	12	0.1289	0.35881	0.999981	521	4	0.084356	0.033067	0.13734	0.48704	378	4	0.084356
NPTX1	12	0.1301	0.36084	0.999981	522	4	0.14988	0.13874	0.37975	0.777163	923	6	0.14988
DummyGuide_1424	1	0.13022	0.13032	0.996528	523	1	-0.4671	0.86978	0.8699	0.999998	2075	0	-0.4671
SCARA3	12	0.1304	0.3614	0.999981	524	5	0.13391	0.065463	0.22624	0.612369	595	6	0.13391
CD226	12	0.13081	0.36207	0.999981	525	4	0.096406	0.014512	0.070179	0.378588	208	6	0.096406
SERPINE2	12	0.13118	0.36261	0.999981	526	5	0.30962	0.018229	0.084574	0.407907	250	7	0.30962
TPTE	12	0.13132	0.36287	0.999981	527	5	-0.13927	0.082647	0.26722	0.659268	675	5	-0.13927
CRIM1	12	0.13225	0.36443	0.999981	528	6	-0.15875	0.34038	0.6403	0.976614	1401	4	-0.15875
DummyGuide_1620	1	0.13228	0.13253	0.996528	529	1	-0.56955	0.86772	0.86795	0.999998	2073	0	-0.56955
DummyGuide_1280	1	0.13252	0.13274	0.996528	530	1	-0.39587	0.86748	0.86772	0.999998	2071	0	-0.39587
SLC38A6	12	0.13345	0.36647	0.999981	531	4	0.0015867	0.84943	0.94829	0.999998	2050	3	0.0015867
RECK	12	0.13361	0.36675	0.999981	532	5	-0.02933	0.20789	0.48617	0.878635	1130	3	-0.02933
SLC44A5	12	0.13457	0.36845	0.999981	533	6	-0.18918	0.51941	0.78991	0.999998	1663	3	-0.18918
DummyGuide_1516	1	0.1347	0.13481	0.996528	534	1	-0.367	0.8653	0.86552	0.999998	2068	0	-0.367
AGPS	12	0.13476	0.36877	0.999981	535	5	0.016264	0.54686	0.80509	0.999998	1698	3	0.016264
DummyGuide_1072	1	0.13511	0.13519	0.996528	536	1	-0.44092	0.86489	0.86518	0.999998	2066	0	-0.44092
DummyGuide_1422	1	0.13641	0.1365	0.999892	537	1	-0.4211	0.86359	0.86384	0.999998	2065	0	-0.4211
TPP1	12	0.13696	0.37222	0.999981	538	6	-0.15536	0.8825	0.96152	0.999998	2093	3	-0.15536
MINPP1	12	0.1371	0.37243	0.999981	539	6	-0.14254	0.5333	0.79753	0.999998	1679	3	-0.14254
DummyGuide_1940	1	0.13782	0.13789	0.999981	540	1	-0.50119	0.86218	0.86235	0.999998	2062	0	-0.50119
DummyGuide_1296	1	0.13811	0.13822	0.999981	541	1	-0.37562	0.86189	0.86205	0.999998	2061	0	-0.37562
UNC5C	12	0.13969	0.3767	0.999981	542	6	-0.1407	0.47324	0.75927	0.999998	1603	4	-0.1407
PTGS2	12	0.14014	0.37743	0.999981	543	6	-0.16603	0.71801	0.90061	0.999998	1925	2	-0.16603
SORL1	12	0.14091	0.37889	0.999981	544	3	0.14907	0.029691	0.1258	0.466686	355	6	0.14907
CDH10	12	0.14145	0.37978	0.999981	545	4	0.053437	0.5718	0.81915	0.999998	1725	4	0.053437
IL1R1	12	0.14153	0.37991	0.999981	546	4	-0.146	0.49578	0.77615	0.999998	1638	4	-0.146
DummyGuide_1445	1	0.14165	0.14184	0.999981	547	1	-0.45378	0.85835	0.85855	0.999998	2056	0	-0.45378
S1PR4	12	0.14219	0.38104	0.999981	548	6	-0.14916	0.84814	0.94776	0.999998	2046	3	-0.14916
ASPH	12	0.1422	0.38105	0.999981	549	4	-0.020905	0.80623	0.93131	0.999998	2001	3	-0.020905
NTRK2	12	0.14252	0.38161	0.999981	550	5	-0.0074758	0.64572	0.86067	0.999998	1827	3	-0.0074758
PLOD1	12	0.14276	0.38204	0.999981	551	4	-0.0072519	0.46404	0.75159	0.999998	1583	5	-0.0072519
TM9SF3	12	0.14337	0.38296	0.999981	552	5	-0.1157	0.7925	0.92631	0.999998	1985	2	-0.1157
IL7R	12	0.14337	0.38296	0.999981	553	4	-0.021217	0.28013	0.58232	0.944763	1301	5	-0.021217
UGGT1	12	0.1439	0.38382	0.999981	554	6	-0.054415	0.052086	0.19241	0.566602	502	5	-0.054415
CD109	12	0.14398	0.38392	0.999981	555	5	-0.10392	0.62374	0.84833	0.999998	1788	3	-0.10392
TNFRSF21	12	0.14404	0.38407	0.999981	556	6	-0.1611	0.10683	0.32197	0.720906	793	4	-0.1611
EPHB4	12	0.1442	0.38435	0.999981	557	4	0.032912	0.20465	0.48153	0.874456	1114	5	0.032912
LRP2	12	0.14421	0.38437	0.999981	558	6	-0.14723	0.097822	0.3021	0.69492	753	5	-0.14723
ITGA2B	12	0.1451	0.38576	0.999981	559	6	-0.13868	0.34259	0.64238	0.976614	1405	4	-0.13868
ITGA1	12	0.14562	0.38666	0.999981	560	6	-0.10874	0.99476	0.99472	0.999998	2284	1	-0.10874
PNPLA6	12	0.14673	0.38844	0.999981	561	6	-0.15956	0.76152	0.91536	0.999998	1960	3	-0.15956
GPR132	12	0.14704	0.38895	0.999981	562	4	0.06432	0.059335	0.21048	0.587347	552	6	0.06432
TMEM87A	12	0.14765	0.38994	0.999981	563	6	-0.1487	0.49401	0.77512	0.999998	1635	4	-0.1487
STAB1	12	0.14871	0.39163	0.999981	564	6	-0.19536	0.99713	0.99701	0.999998	2296	0	-0.19536
ITGA7	12	0.14993	0.39346	0.999981	565	6	-0.11984	0.33014	0.63053	0.972388	1383	3	-0.11984
DummyGuide_1418	1	0.15078	0.15087	0.999981	566	1	-0.40088	0.84922	0.84912	0.999998	2048	0	-0.40088
CD53	12	0.15147	0.39577	0.999981	567	5	-0.05539	0.71335	0.89823	0.999998	1918	3	-0.05539
KCNE3	12	0.1523	0.39705	0.999981	568	5	-0.13389	0.86585	0.95487	0.999998	2069	2	-0.13389
TF	12	0.15237	0.39717	0.999981	569	6	-0.080578	0.47438	0.76025	0.999998	1606	5	-0.080578
PLAUR	12	0.15248	0.39736	0.999981	570	6	-0.1277	0.27884	0.58103	0.944056	1299	5	-0.1277
ZDHHC5	12	0.15354	0.39902	0.999981	571	5	-0.11313	0.39514	0.69126	0.999998	1483	3	-0.11313
CDH17	12	0.15435	0.40051	0.999981	572	4	0.033957	0.41998	0.71373	0.999998	1520	4	0.033957
CD276	12	0.15529	0.40209	0.999981	573	3	0.17159	0.091444	0.2874	0.679713	722	7	0.17159
CHST6	12	0.15556	0.40247	0.999981	574	1	0.38731	0.0034616	0.020847	0.243116	73	8	0.38731
ABCA2	12	0.15561	0.40256	0.999981	575	4	0.19885	0.056457	0.20338	0.5813	533	6	0.19885
TFPI	12	0.15596	0.40312	0.999981	576	5	-0.10268	0.7554	0.91311	0.999998	1953	3	-0.10268
UGT1A9	12	0.15613	0.40334	0.999981	577	4	0.049518	0.096192	0.29834	0.694451	741	6	0.049518
FKBP10	12	0.15613	0.40335	0.999981	578	4	-0.041869	0.62647	0.84991	0.999998	1793	4	-0.041869
SLC1A5	12	0.15616	0.40343	0.999981	579	5	-0.046986	0.60412	0.83738	0.999998	1764	3	-0.046986
SIL1	12	0.15679	0.40438	0.999981	580	4	0.030985	0.019001	0.087523	0.414514	257	5	0.030985
NPC1	12	0.15804	0.4064	0.999981	581	4	-0.0018789	0.18652	0.4546	0.853154	1066	3	-0.0018789
CDH11	12	0.15829	0.40685	0.999981	582	3	-0.017842	0.45146	0.7409	0.999998	1564	5	-0.017842
DummyGuide_1307	1	0.15979	0.15946	0.999981	583	1	-0.44436	0.84021	0.84006	0.999998	2041	0	-0.44436
UNC5A	12	0.15995	0.4095	0.999981	584	4	0.15792	0.20546	0.48263	0.874928	1122	6	0.15792
DummyGuide_1746	1	0.16009	0.15974	0.999981	585	1	-0.36593	0.83991	0.83981	0.999998	2040	0	-0.36593
ALCAM	12	0.16074	0.41071	0.999981	586	6	-0.15539	0.13612	0.37569	0.777163	913	5	-0.15539
DummyGuide_1760	1	0.16144	0.16102	0.999981	587	1	-0.4379	0.83856	0.83835	0.999998	2037	0	-0.4379
CD164	12	0.16186	0.41253	0.999981	588	6	-0.16837	0.82445	0.93836	0.999998	2021	3	-0.16837
THBS3	12	0.16189	0.41259	0.999981	589	4	0.0036369	0.41344	0.70778	0.999998	1509	5	0.0036369
AEBP1	12	0.16258	0.41369	0.999981	590	5	0.057895	0.15064	0.39859	0.796853	956	6	0.057895
PCYOX1	12	0.1631	0.41457	0.999981	591	6	-0.11834	0.72303	0.9023	0.999998	1931	2	-0.11834
NCEH1	12	0.16311	0.41458	0.999981	592	6	-0.11537	0.30477	0.60656	0.957419	1350	2	-0.11537
ITGB2	12	0.16332	0.41499	0.999981	593	6	-0.11468	0.036872	0.15062	0.511179	406	5	-0.11468
FNDC5	12	0.16346	0.41518	0.999981	594	5	-0.13114	0.67368	0.87628	0.999998	1865	2	-0.13114
LAMA4	12	0.16355	0.41531	0.999981	595	6	-0.1854	0.92681	0.97265	0.999998	2154	2	-0.1854
CDCP1	12	0.16388	0.41585	0.999981	596	6	-0.18172	0.45793	0.74656	0.999998	1574	3	-0.18172
INSR	12	0.164	0.416	0.999981	597	6	-0.11447	0.47188	0.75809	0.999998	1600	3	-0.11447
DummyGuide_1791	1	0.16457	0.16416	0.999981	598	1	-0.39072	0.83543	0.83515	0.999998	2030	0	-0.39072
DummyGuide_1949	1	0.16492	0.16448	0.999981	599	1	-0.39778	0.83508	0.83484	0.999998	2029	0	-0.39778
LMBRD2	12	0.16536	0.41823	0.999981	600	6	-0.13096	0.21131	0.49119	0.883608	1136	3	-0.13096
DummyGuide_1294	1	0.16604	0.16564	0.999981	601	1	-0.4055	0.83396	0.83367	0.999998	2027	0	-0.4055
DummyGuide_1782	1	0.16663	0.16622	0.999981	602	1	-0.43919	0.83337	0.83305	0.999998	2026	0	-0.43919
CDH15	12	0.16674	0.42057	0.999981	603	5	0.18332	0.053429	0.19588	0.573213	510	6	0.18332
GGT1	12	0.1675	0.42181	0.999981	604	5	-0.024293	0.47619	0.76183	0.999998	1608	3	-0.024293
ACAA1	12	0.16814	0.42283	0.999981	605	3	0.14282	0.088624	0.281	0.673424	708	5	0.14282
COLEC12	12	0.16818	0.42292	0.999981	606	4	0.1019	0.22991	0.51769	0.900399	1179	6	0.1019
LRP12	12	0.16878	0.42384	0.999981	607	5	-0.1187	0.29682	0.59878	0.953933	1330	4	-0.1187
TMIGD2	12	0.169	0.42415	0.999981	608	6	-0.1407	0.40838	0.70322	0.999998	1499	2	-0.1407
GLT8D2	12	0.16981	0.42552	0.999981	609	6	-0.1453	0.045465	0.17469	0.546328	469	4	-0.1453
IL4I1	12	0.17005	0.42591	0.999981	610	6	-0.1613	0.87789	0.95966	0.999998	2084	3	-0.1613
CD69	12	0.17006	0.42594	0.999981	611	5	-0.081308	0.81748	0.9357	0.999998	2015	3	-0.081308
SEMA4G	12	0.17028	0.42624	0.999981	612	6	-0.15929	0.71105	0.89699	0.999998	1913	3	-0.15929
TLR9	12	0.17108	0.42762	0.999981	613	6	-0.17125	0.20503	0.482	0.874456	1119	2	-0.17125
RNF13	12	0.17153	0.42829	0.999981	614	5	-0.11009	0.36198	0.66035	0.989678	1429	4	-0.11009
LMAN2	12	0.17176	0.42868	0.999981	615	5	-0.042872	0.29079	0.59295	0.952672	1317	5	-0.042872
ANGPTL4	12	0.17213	0.42924	0.999981	616	6	-0.17754	0.98802	0.99153	0.999998	2254	1	-0.17754
DPY19L4	12	0.17224	0.42939	0.999981	617	6	-0.19713	0.92599	0.97244	0.999998	2152	2	-0.19713
FGL2	12	0.17253	0.42984	0.999981	618	4	-0.049286	0.34073	0.64064	0.976614	1402	3	-0.049286
COL5A2	12	0.17354	0.43143	0.999981	619	4	0.044619	0.30628	0.60801	0.958422	1352	5	0.044619
CD151	12	0.17401	0.43214	0.999981	620	5	-0.090108	0.99882	0.99868	0.999998	2312	0	-0.090108
NT5E	12	0.17473	0.43336	0.999981	621	4	-0.11051	0.77013	0.91838	0.999998	1968	2	-0.11051
DummyGuide_1844	1	0.17711	0.17685	0.999981	622	1	-0.37541	0.82289	0.82266	0.999998	2019	0	-0.37541
SLITRK3	12	0.17729	0.43735	0.999981	623	6	-0.10097	0.35206	0.651	0.983853	1417	5	-0.10097
PTPRG	12	0.17847	0.43921	0.999981	624	5	-0.081878	0.62764	0.85053	0.999998	1797	3	-0.081878
SLC39A8	12	0.17869	0.43958	0.999981	625	6	-0.13492	0.32977	0.63019	0.972388	1382	4	-0.13492
BRI3BP	12	0.17914	0.44033	0.999981	626	3	-0.071292	0.16878	0.42713	0.826749	1012	4	-0.071292
COL12A1	12	0.17973	0.44114	0.999981	627	4	0.01412	0.37655	0.67412	0.998189	1452	4	0.01412
NELL1	12	0.18048	0.44237	0.999981	628	5	0.0099595	0.2245	0.51016	0.893074	1172	5	0.0099595
LPAR5	12	0.18064	0.44263	0.999981	629	3	0.18499	0.076992	0.25417	0.643132	651	7	0.18499
LY9	12	0.18082	0.44291	0.999981	630	6	-0.12701	0.34182	0.64162	0.976614	1403	3	-0.12701
SCN4B	12	0.18121	0.44349	0.999981	631	4	-0.090387	0.3179	0.61907	0.965465	1366	4	-0.090387
GPR107	12	0.18182	0.44447	0.999981	632	3	0.051164	0.40657	0.70151	0.999998	1494	5	0.051164
DummyGuide_1663	1	0.182	0.18137	0.999981	633	1	-0.36981	0.818	0.81797	0.999998	2016	0	-0.36981
MFSD8	12	0.18214	0.44498	0.999981	634	6	-0.17056	0.61517	0.84361	0.999998	1780	2	-0.17056
COL6A1	12	0.1824	0.44543	0.999981	635	5	0.076621	0.25776	0.55593	0.924229	1256	6	0.076621
DummyGuide_1709	1	0.18253	0.18189	0.999981	636	1	-0.28643	0.81747	0.8174	0.999998	2014	0	-0.28643
DummyGuide_1771	1	0.18259	0.18195	0.999981	637	1	-0.34344	0.81741	0.81734	0.999998	2013	0	-0.34344
PON1	12	0.18353	0.4473	0.999981	638	4	0.084422	0.15118	0.39945	0.796853	961	6	0.084422
NCAM2	12	0.18416	0.44832	0.999981	639	3	0.14714	0.05516	0.20018	0.579129	522	6	0.14714
MICB	12	0.18417	0.44836	0.999981	640	6	-0.11752	0.13068	0.36674	0.769386	892	4	-0.11752
DummyGuide_1517	1	0.18448	0.18367	0.999981	641	1	-0.35327	0.81552	0.81548	0.999998	2010	0	-0.35327
ELOVL6	12	0.18742	0.4534	0.999981	642	5	-0.070178	0.66986	0.87416	0.999998	1861	1	-0.070178
CTNS	12	0.18826	0.45469	0.999981	643	4	-0.01555	0.14978	0.39739	0.796853	948	5	-0.01555
ADCY9	12	0.18857	0.45507	0.999981	644	4	-0.066107	0.51587	0.78787	0.999998	1660	3	-0.066107
UGT8	12	0.18872	0.45535	0.999981	645	4	-0.079117	0.69433	0.88768	0.999998	1896	2	-0.079117
DMXL2	12	0.18877	0.45544	0.999981	646	6	-0.1712	0.99788	0.99776	0.999998	2307	0	-0.1712
LMAN2L	12	0.18885	0.45553	0.999981	647	5	-0.11408	0.79175	0.92608	0.999998	1983	2	-0.11408
BST1	12	0.1895	0.45644	0.999981	648	3	0.034376	0.004398	0.025536	0.264851	88	3	0.034376
CD55	12	0.18961	0.4566	0.999981	649	6	-0.14434	0.50031	0.77857	0.999998	1645	4	-0.14434
PLXNA1	12	0.18978	0.45686	0.999981	650	5	-0.13947	0.61191	0.84176	0.999998	1777	3	-0.13947
HTR2B	12	0.19024	0.4575	0.999981	651	6	-0.18564	0.056628	0.20385	0.5813	535	3	-0.18564
NCAM1	12	0.19059	0.45803	0.999981	652	3	0.17973	0.10132	0.31007	0.702631	775	7	0.17973
ARSE	12	0.19085	0.45848	0.999981	653	4	0.13809	0.048543	0.18301	0.55564	485	6	0.13809
GOLM1	12	0.19118	0.45899	0.999981	654	4	-0.086547	0.1825	0.44829	0.845372	1052	4	-0.086547
NTNG1	12	0.19335	0.46235	0.999981	655	5	-0.12566	0.99197	0.99316	0.999998	2272	1	-0.12566
DummyGuide_1577	1	0.19449	0.19379	0.999981	656	1	-0.35566	0.80551	0.80575	0.999998	2000	0	-0.35566
HGSNAT	12	0.19466	0.46442	0.999981	657	4	0.31237	0.0049804	0.028535	0.269375	95	7	0.31237
ADAM22	12	0.19468	0.46442	0.999981	658	5	-0.031086	0.6378	0.85645	0.999998	1814	3	-0.031086
TIE1	12	0.1951	0.46511	0.999981	659	6	-0.16255	0.372	0.66992	0.994811	1447	3	-0.16255
ANO9	12	0.19524	0.46533	0.999981	660	5	-0.0087599	0.50491	0.78133	0.999998	1652	4	-0.0087599
DummyGuide_1384	1	0.19591	0.19513	0.999981	661	1	-0.30536	0.80409	0.8043	0.999998	1996	0	-0.30536
ABCC2	12	0.1964	0.4672	0.999981	662	5	-0.066598	0.80799	0.93192	0.999998	2002	2	-0.066598
TMEM63C	12	0.1964	0.4672	0.999981	663	6	-0.12774	0.49464	0.77547	0.999998	1637	2	-0.12774
DummyGuide_1416	1	0.19726	0.19654	0.999981	664	1	-0.30568	0.80274	0.80292	0.999998	1995	0	-0.30568
ATL1	12	0.19765	0.46913	0.999981	665	6	-0.1754	0.94543	0.97809	0.999998	2183	1	-0.1754
CADM2	12	0.1989	0.47114	0.999981	666	6	-0.086557	0.62677	0.85003	0.999998	1794	4	-0.086557
DummyGuide_1980	1	0.19903	0.1982	0.999981	667	1	-0.3048	0.80097	0.80128	0.999998	1994	0	-0.3048
F3	12	0.19927	0.47166	0.999981	668	6	-0.11572	0.42082	0.71441	0.999998	1522	4	-0.11572
LRP1B	12	0.20011	0.4729	0.999981	669	4	0.015668	0.24334	0.53629	0.913974	1216	5	0.015668
KCNA3	12	0.20023	0.47307	0.999981	670	5	-0.10709	0.58592	0.82704	0.999998	1737	2	-0.10709
ITPRIP	12	0.20054	0.47356	0.999981	671	5	0.1689	0.05895	0.2095	0.586708	549	7	0.1689
NAGLU	12	0.20068	0.47383	0.999981	672	3	0.12074	0.029684	0.12578	0.466686	354	4	0.12074
DummyGuide_1796	1	0.20074	0.1999	0.999981	673	1	-0.28824	0.79926	0.79952	0.999998	1993	0	-0.28824
GLB1	12	0.2009	0.47421	0.999981	674	6	-0.040267	0.48293	0.76732	0.999998	1622	4	-0.040267
DummyGuide_1695	1	0.20191	0.20114	0.999981	675	1	-0.37712	0.79809	0.79843	0.999998	1991	0	-0.37712
UNC5B	12	0.20192	0.47569	0.999981	676	6	-0.175	0.73383	0.90582	0.999998	1938	3	-0.175
ANPEP	12	0.20254	0.47664	0.999981	677	6	-0.19204	0.99576	0.99558	0.999998	2290	1	-0.19204
SLAMF6	12	0.20274	0.47695	0.999981	678	4	0.013002	0.30097	0.60292	0.955235	1341	3	0.013002
CHRNA3	12	0.20389	0.47866	0.999981	679	5	-0.13819	0.22205	0.50664	0.891561	1165	4	-0.13819
TEK	12	0.20391	0.47869	0.999981	680	4	0.027638	0.15737	0.40917	0.808688	976	4	0.027638
DummyGuide_1700	1	0.20439	0.2037	0.999981	681	1	-0.28016	0.79561	0.7961	0.999998	1990	0	-0.28016
SLC45A4	12	0.20441	0.47938	0.999981	682	5	0.068256	0.43533	0.72685	0.999998	1538	5	0.068256
DummyGuide_1096	1	0.20474	0.20409	0.999981	683	1	-0.31157	0.79526	0.79574	0.999998	1989	0	-0.31157
GGCX	12	0.20631	0.48209	0.999981	684	5	-0.10038	0.91799	0.97028	0.999998	2144	1	-0.10038
TLL1	12	0.20681	0.48283	0.999981	685	3	0.26283	0.016909	0.079501	0.400756	235	6	0.26283
LRRC25	12	0.20698	0.4831	0.999981	686	6	-0.073991	0.082908	0.26786	0.659268	678	4	-0.073991
TTC17	12	0.20732	0.48364	0.999981	687	4	0.16063	0.16786	0.42573	0.8251	1010	6	0.16063
EEF1D	12	0.2084	0.48531	0.999981	688	4	-0.037283	0.31032	0.61176	0.959816	1357	4	-0.037283
THSD4	12	0.2089	0.48603	0.999981	689	6	-0.16259	0.52163	0.79115	0.999998	1666	2	-0.16259
DKK3	12	0.20903	0.4862	0.999981	690	6	-0.17552	0.87903	0.96011	0.999998	2087	3	-0.17552
DummyGuide_1584	1	0.20928	0.20846	0.999981	691	1	-0.28872	0.79072	0.79107	0.999998	1982	0	-0.28872
TMEM181	12	0.20944	0.48681	0.999981	692	5	-0.11867	0.47892	0.76397	0.999998	1615	2	-0.11867
LAMP3	12	0.20999	0.48762	0.999981	693	4	-0.030413	0.47851	0.76365	0.999998	1614	3	-0.030413
DummyGuide_1241	1	0.2104	0.20954	0.999981	694	1	-0.29355	0.7896	0.78993	0.999998	1981	0	-0.29355
NUP210	12	0.21074	0.48877	0.999981	695	5	-0.0038327	0.15313	0.40237	0.800648	966	4	-0.0038327
CLN3	12	0.21148	0.48987	0.999981	696	6	-0.16555	0.88153	0.96113	0.999998	2091	2	-0.16555
CCR4	12	0.21211	0.49081	0.999981	697	4	0.057578	0.33649	0.63642	0.976281	1393	4	0.057578
KIT	12	0.21212	0.49085	0.999981	698	6	-0.10611	0.66367	0.87074	0.999998	1852	4	-0.10611
ITGA6	12	0.2123	0.49111	0.999981	699	5	-0.12178	0.85644	0.95101	0.999998	2054	2	-0.12178
ERGIC2	12	0.2129	0.49199	0.999981	700	3	-0.02598	0.50531	0.78154	0.999998	1653	3	-0.02598
NEGR1	12	0.21317	0.49236	0.999981	701	6	-0.099876	0.18815	0.45694	0.854808	1071	5	-0.099876
CACNA2D1	12	0.21323	0.49245	0.999981	702	4	0.16346	0.10135	0.31016	0.702631	776	6	0.16346
SERPING1	12	0.21356	0.49286	0.999981	703	6	-0.079481	0.666	0.87194	0.999998	1854	2	-0.079481
AGTR2	12	0.2137	0.49305	0.999981	704	5	-0.10286	0.40984	0.70456	0.999998	1501	5	-0.10286
SLC26A5	12	0.21415	0.49361	0.999981	705	4	0.068637	0.16359	0.41894	0.820176	991	4	0.068637
RERG	12	0.21528	0.49542	0.999981	706	2	0.19987	0.083678	0.26967	0.660354	685	7	0.19987
POFUT2	12	0.21582	0.49629	0.999981	707	5	-0.067828	0.78685	0.92443	0.999998	1980	3	-0.067828
LAMC1	12	0.21631	0.49703	0.999981	708	5	0.0194	0.45025	0.73984	0.999998	1561	5	0.0194
MGAT5B	12	0.21642	0.49719	0.999981	709	4	0.013751	0.50458	0.78117	0.999998	1651	4	0.013751
PODXL2	12	0.21693	0.49799	0.999981	710	6	-0.15782	0.64361	0.85953	0.999998	1823	2	-0.15782
SLC44A2	12	0.21698	0.49808	0.999981	711	3	0.084521	0.10084	0.30894	0.70238	772	4	0.084521
LAMA1	12	0.21708	0.49827	0.999981	712	5	-0.082647	0.37004	0.66794	0.994811	1441	4	-0.082647
CXCR5	12	0.21758	0.49899	0.999981	713	6	-0.0888	0.37064	0.66861	0.994811	1443	4	-0.0888
CANT1	12	0.21802	0.49958	0.999981	714	5	0.067495	0.37932	0.6767	0.998769	1458	5	0.067495
HLA-E	12	0.21902	0.50114	0.999981	715	6	-0.10518	0.58995	0.82928	0.999998	1745	4	-0.10518
PIGG	12	0.21924	0.50138	0.999981	716	5	0.07064	0.29302	0.59507	0.952764	1325	5	0.07064
CD59	12	0.22091	0.50374	0.999981	717	5	0.044883	0.078658	0.25796	0.647392	658	5	0.044883
PCDH18	12	0.22141	0.50451	0.999981	718	4	-0.0047781	0.58445	0.82617	0.999998	1736	3	-0.0047781
CD3D	12	0.22168	0.50494	0.999981	719	6	-0.082678	0.10012	0.30741	0.700851	767	5	-0.082678
TSPAN31	12	0.22204	0.50548	0.999981	720	6	-0.16696	0.95357	0.98087	0.999998	2191	2	-0.16696
PCDHGB1	12	0.22236	0.50605	0.999981	721	4	-0.12252	0.021349	0.096233	0.433787	275	3	-0.12252
HSP90B1	12	0.22271	0.50657	0.999981	722	6	-0.14895	0.52808	0.79472	0.999998	1676	2	-0.14895
SMPD1	12	0.22298	0.50698	0.999981	723	6	-0.16368	0.46474	0.75215	0.999998	1587	2	-0.16368
SLC3A2	12	0.22317	0.5072	0.999981	724	5	0.033106	0.15097	0.39904	0.796853	958	6	0.033106
SLC22A4	12	0.22351	0.50773	0.999981	725	6	-0.13781	0.63369	0.854	0.999998	1807	4	-0.13781
PDCD1LG2	12	0.22365	0.50794	0.999981	726	5	-0.038561	0.14214	0.3854	0.784866	926	5	-0.038561
GALNS	12	0.22377	0.50808	0.999981	727	6	0.095314	0.037688	0.15326	0.512924	414	6	0.095314
GPC1	12	0.22429	0.50881	0.999981	728	4	-0.029398	0.35333	0.65217	0.9846	1418	4	-0.029398
SCARF2	12	0.2247	0.5094	0.999981	729	6	-0.11949	0.8592	0.95219	0.999998	2058	2	-0.11949
ENPP4	12	0.22485	0.50962	0.999981	730	4	-0.048574	0.61622	0.84421	0.999998	1781	3	-0.048574
ENTPD2	12	0.22541	0.51044	0.999981	731	4	-0.025106	0.25998	0.5591	0.927487	1262	4	-0.025106
DummyGuide_1943	1	0.22619	0.22544	0.999981	732	1	-0.346	0.77381	0.77402	0.999998	1971	0	-0.346
RNF149	12	0.22624	0.51167	0.999981	733	5	-0.12004	0.37942	0.6768	0.998769	1461	4	-0.12004
NID2	12	0.22683	0.51256	0.999981	734	6	0.0031836	0.23085	0.51904	0.901199	1181	6	0.0031836
CNNM4	12	0.22738	0.51329	0.999981	735	5	-0.071939	0.95582	0.98166	0.999998	2195	2	-0.071939
PBXIP1	12	0.2282	0.51447	0.999981	736	4	0.023516	0.037635	0.15309	0.512924	413	4	0.023516
CD86	12	0.22897	0.5155	0.999981	737	5	0.035139	0.039799	0.1596	0.523997	433	5	0.035139
VIM	12	0.22932	0.51597	0.999981	738	5	-0.054608	0.056303	0.20304	0.5813	530	5	-0.054608
WNT5B	12	0.22964	0.51639	0.999981	739	6	-0.14334	0.53576	0.7989	0.999998	1684	2	-0.14334
DummyGuide_1992	1	0.23119	0.23069	0.999981	740	1	-0.30991	0.76881	0.76896	0.999998	1966	0	-0.30991
CD33	12	0.23154	0.5191	0.999981	741	4	0.098312	0.047493	0.18017	0.553489	479	5	0.098312
LTBP1	12	0.23166	0.51924	0.999981	742	6	-0.13684	0.93222	0.97419	0.999998	2159	2	-0.13684
CACNG6	12	0.23289	0.52101	0.999981	743	6	-0.02632	0.085422	0.27365	0.6647	694	5	-0.02632
DummyGuide_1825	1	0.23314	0.2326	0.999981	744	1	-0.28638	0.76686	0.76707	0.999998	1965	0	-0.28638
SORCS1	12	0.23453	0.52324	0.999981	745	4	-0.094573	0.54432	0.8037	0.999998	1696	4	-0.094573
DummyGuide_1942	1	0.2349	0.23437	0.999981	746	1	-0.2596	0.7651	0.76514	0.999998	1963	0	-0.2596
MST1R	12	0.23503	0.52396	0.999981	747	5	0.024949	0.14691	0.39298	0.792049	940	6	0.024949
SULF2	12	0.23542	0.52454	0.999981	748	3	0.12954	0.11805	0.3457	0.74821	843	5	0.12954
DummyGuide_1616	1	0.23561	0.23499	0.999981	749	1	-0.27409	0.76439	0.7643	0.999998	1962	0	-0.27409
IFNAR2	12	0.23615	0.52556	0.999981	750	4	0.082026	0.090127	0.28453	0.676249	715	6	0.082026
ANGPTL1	12	0.23667	0.52636	0.999981	751	6	-0.17373	0.41613	0.71017	0.999998	1515	2	-0.17373
ITGA3	12	0.23701	0.52685	0.999981	752	4	0.034373	0.34743	0.64673	0.979913	1411	5	0.034373
SLC22A23	12	0.23762	0.52766	0.999981	753	6	-0.029895	0.18346	0.44983	0.846578	1057	5	-0.029895
TMEM9	12	0.23763	0.52768	0.999981	754	5	-0.032858	0.21503	0.49642	0.887958	1144	5	-0.032858
CD72	12	0.2378	0.52797	0.999981	755	5	0.02735	0.21562	0.49729	0.887958	1148	6	0.02735
LIPG	12	0.23858	0.52896	0.999981	756	6	-0.12073	0.72252	0.90212	0.999998	1929	3	-0.12073
ITGAE	12	0.23869	0.52911	0.999981	757	4	0.0085105	0.4878	0.77127	0.999998	1630	5	0.0085105
TLR1	12	0.23873	0.52915	0.999981	758	2	0.13505	0.015761	0.075218	0.389159	227	6	0.13505
SMO	12	0.23879	0.52924	0.999981	759	4	0.20955	0.076351	0.2526	0.642145	646	7	0.20955
TMEM25	12	0.23912	0.52978	0.999981	760	6	-0.076633	0.087672	0.27897	0.671769	703	5	-0.076633
DummyGuide_1811	1	0.23915	0.23866	0.999981	761	1	-0.28045	0.76085	0.76086	0.999998	1959	0	-0.28045
DummyGuide_1227	1	0.23926	0.23881	0.999981	762	1	-0.2708	0.76074	0.76072	0.999998	1958	0	-0.2708
EMP3	12	0.23928	0.52996	0.999981	763	3	0.045959	0.61073	0.84108	0.999998	1774	4	0.045959
ACVR2A	12	0.23981	0.53071	0.999981	764	6	-0.093934	0.18077	0.44561	0.844382	1045	5	-0.093934
SLC5A1	12	0.24008	0.5312	0.999981	765	6	-0.16694	0.89088	0.96403	0.999998	2108	1	-0.16694
NAALADL2	12	0.24035	0.53164	0.999981	766	5	-0.049167	0.076737	0.25363	0.642713	650	5	-0.049167
CSPG4	12	0.24052	0.53191	0.999981	767	5	-0.1347	0.33992	0.63983	0.976614	1399	5	-0.1347
TMEM179B	12	0.24141	0.53326	0.999981	768	5	-0.12267	0.91898	0.9705	0.999998	2146	2	-0.12267
SLC39A14	12	0.24417	0.53708	0.999981	769	4	0.18166	0.097212	0.30075	0.694632	744	7	0.18166
GALNT5	12	0.24421	0.53712	0.999981	770	6	-0.14943	0.96306	0.98444	0.999998	2213	2	-0.14943
MICA	12	0.24628	0.53993	0.999981	771	6	-0.093751	0.43751	0.72867	0.999998	1544	3	-0.093751
COL5A3	12	0.24642	0.54012	0.999981	772	6	-0.12296	0.39737	0.69336	0.999998	1487	3	-0.12296
OGN	12	0.24697	0.54085	0.999981	773	6	-0.14989	0.31463	0.61587	0.963684	1362	4	-0.14989
FICD	12	0.24768	0.54198	0.999981	774	4	0.0054629	0.64224	0.85878	0.999998	1819	3	0.0054629
EMILIN2	12	0.24801	0.54233	0.999981	775	4	-0.026798	0.93618	0.97538	0.999998	2167	1	-0.026798
ANO6	12	0.24855	0.54284	0.999981	776	3	0.034868	0.34452	0.64404	0.9771	1406	3	0.034868
F13A1	12	0.24873	0.54304	0.999981	777	4	0.07036	0.090738	0.28581	0.676713	719	6	0.07036
HLA-DRB1	12	0.24913	0.5435	0.999981	778	4	0.068375	0.082725	0.26738	0.659268	676	6	0.068375
DummyGuide_1928	1	0.24922	0.24877	0.999981	779	1	-0.33163	0.75078	0.75063	0.999998	1949	0	-0.33163
TNFRSF11A	12	0.2513	0.54571	0.999981	780	3	-0.0069553	0.12634	0.35952	0.759881	881	5	-0.0069553
PTAFR	12	0.25261	0.54715	0.999981	781	5	-0.13432	0.82578	0.93886	0.999998	2022	2	-0.13432
AOC3	12	0.25442	0.54901	0.999981	782	5	-0.13097	0.62531	0.84923	0.999998	1791	4	-0.13097
DummyGuide_1430	1	0.25452	0.25391	0.999981	783	1	-0.28007	0.74548	0.74552	0.999998	1946	0	-0.28007
CRELD2	12	0.25666	0.55122	0.999981	784	4	0.083866	0.20389	0.48049	0.874456	1112	3	0.083866
MAN2A1	12	0.2567	0.55123	0.999981	785	5	0.16181	0.13386	0.37196	0.774313	905	6	0.16181
DummyGuide_1794	1	0.25758	0.25709	0.999981	786	1	-0.29514	0.74242	0.7425	0.999998	1944	0	-0.29514
LIPE	12	0.25759	0.55217	0.999981	787	5	0.11648	0.2492	0.54429	0.917861	1237	6	0.11648
HP	12	0.25831	0.55298	0.999981	788	2	0.10531	0.02688	0.11595	0.459893	322	6	0.10531
SELPLG	12	0.25877	0.55346	0.999981	789	5	0.22967	0.069758	0.23653	0.626945	611	7	0.22967
FGFRL1	12	0.25885	0.55354	0.999981	790	3	0.098782	0.0060172	0.03357	0.290362	110	4	0.098782
CD34	12	0.25965	0.55444	0.999981	791	3	0.020023	0.4644	0.75189	0.999998	1586	4	0.020023
DummyGuide_1973	1	0.25965	0.25915	0.999981	792	1	-0.24977	0.74035	0.74035	0.999998	1942	0	-0.24977
MRC2	12	0.26155	0.55654	0.999981	793	5	-0.088981	0.32919	0.62968	0.972388	1381	3	-0.088981
IL13RA1	12	0.26288	0.55784	0.999981	794	4	-0.014275	0.39871	0.69453	0.999998	1490	4	-0.014275
SPPL2B	12	0.26367	0.55851	0.999981	795	3	0.094576	0.15105	0.39916	0.796853	959	3	0.094576
KLRF1	10	0.26372	0.53978	0.999981	796	5	-0.049442	0.24338	0.51385	0.896851	1217	4	-0.049442
TNFRSF11B	12	0.26423	0.55914	0.999981	797	4	0.094019	0.022351	0.10002	0.435251	285	5	0.094019
PON2	12	0.26426	0.55915	0.999981	798	5	0.19031	0.075917	0.25175	0.642105	643	7	0.19031
MUC4	12	0.26799	0.56282	0.999981	799	5	-0.019246	0.29602	0.59794	0.953933	1328	4	-0.019246
GALNT11	12	0.26846	0.56335	0.999981	800	3	0.14073	0.11939	0.34802	0.749609	847	6	0.14073
SLIT3	12	0.27058	0.56566	0.999981	801	2	0.28877	0.020482	0.093031	0.427577	270	7	0.28877
DummyGuide_1312	1	0.27102	0.27068	0.999981	802	1	-0.26178	0.72898	0.72889	0.999998	1935	0	-0.26178
HLA-DPA1	12	0.27105	0.56618	0.999981	803	4	0.11049	0.0011284	0.0078756	0.197098	30	6	0.11049
DummyGuide_1434	1	0.27108	0.27073	0.999981	804	1	-0.20219	0.72892	0.72882	0.999998	1934	0	-0.20219
SLC29A4	12	0.27114	0.56631	0.999981	805	3	0.14805	0.14247	0.38593	0.785268	927	6	0.14805
MPZL2	12	0.27154	0.56671	0.999981	806	5	0.18575	0.05641	0.20328	0.5813	532	7	0.18575
OSCAR	12	0.27217	0.56733	0.999981	807	4	-0.12834	0.78476	0.92374	0.999998	1979	2	-0.12834
LRP10	12	0.27323	0.56854	0.999981	808	3	-0.053244	0.64766	0.8619	0.999998	1831	4	-0.053244
SMPDL3B	12	0.2735	0.56882	0.999981	809	3	-0.070295	0.99934	0.99922	0.999998	2318	0	-0.070295
LIFR	12	0.27375	0.56904	0.999981	810	4	-0.040802	0.12853	0.36318	0.764185	888	2	-0.040802
AGTR1	12	0.27479	0.57004	0.999981	811	5	0.022113	0.23287	0.52181	0.902682	1190	6	0.022113
DummyGuide_1779	1	0.27732	0.27698	0.999981	812	1	-0.2239	0.72268	0.72262	0.999998	1930	0	-0.2239
LAMA2	12	0.27785	0.57292	0.999981	813	4	0.099473	0.24312	0.53603	0.913974	1214	5	0.099473
CD302	12	0.27854	0.57368	0.999981	814	5	0.11518	0.30821	0.60973	0.959197	1354	5	0.11518
LTF	12	0.27867	0.57383	0.999981	815	3	0.037019	0.42374	0.71693	0.999998	1525	5	0.037019
RFNG	12	0.27899	0.57416	0.999981	816	5	-0.0055867	0.68613	0.88337	0.999998	1888	3	-0.0055867
ISLR	12	0.27931	0.57449	0.999981	817	5	0.067547	0.36497	0.66307	0.992492	1432	5	0.067547
IL4R	12	0.2794	0.57459	0.999981	818	4	-0.085984	0.26596	0.56693	0.931898	1274	4	-0.085984
GFAP	12	0.28034	0.57555	0.999981	819	4	0.059976	0.29142	0.59361	0.952672	1318	5	0.059976
DummyGuide_1918	1	0.28133	0.28071	0.999981	820	1	-0.22319	0.71867	0.71843	0.999998	1926	0	-0.22319
TMEM156	12	0.28162	0.57688	0.999981	821	4	0.11694	0.055217	0.20034	0.579129	524	6	0.11694
GNS	12	0.28323	0.57853	0.999981	822	4	0.10112	0.22307	0.50819	0.892078	1168	5	0.10112
DummyGuide_1255	1	0.2838	0.28311	0.999981	823	1	-0.18151	0.7162	0.71602	0.999998	1924	0	-0.18151
CD44	12	0.28401	0.57941	0.999981	824	5	-0.12253	0.94015	0.97652	0.999998	2170	1	-0.12253
TNFRSF14	12	0.28475	0.58015	0.999981	825	3	-0.011748	0.57234	0.81949	0.999998	1726	3	-0.011748
CTSD	12	0.2852	0.58063	0.999981	826	3	0.036343	0.33258	0.63269	0.973113	1389	4	0.036343
DummyGuide_1607	1	0.28586	0.28521	0.999981	827	1	-0.24265	0.71414	0.71392	0.999998	1919	0	-0.24265
CR1	12	0.2869	0.58224	0.999981	828	5	0.11862	0.064785	0.2246	0.61023	592	6	0.11862
CASD1	12	0.28742	0.58277	0.999981	829	4	-0.1136	0.092986	0.29072	0.683501	730	4	-0.1136
DummyGuide_1169	1	0.28775	0.28712	0.999981	830	1	-0.22151	0.71225	0.71198	0.999998	1916	0	-0.22151
LRRN4CL	12	0.28838	0.58385	0.999981	831	3	0.25557	0.027063	0.11662	0.460246	327	7	0.25557
HSP90AA1	12	0.28968	0.58527	0.999981	832	5	-0.06315	0.39804	0.69398	0.999998	1488	5	-0.06315
ABCC4	12	0.28993	0.58558	0.999981	833	3	0.21726	0.073264	0.24523	0.63535	629	7	0.21726
PTTG1IP	12	0.29041	0.58609	0.999981	834	3	0.19767	0.056735	0.20414	0.5813	536	7	0.19767
EFNA4	12	0.29047	0.58613	0.999981	835	5	-0.084552	0.83727	0.94347	0.999998	2034	2	-0.084552
PCDHGB7	12	0.29096	0.58664	0.999981	836	2	0.24092	0.03009	0.12723	0.468789	360	8	0.24092
LILRA5	12	0.29124	0.58689	0.999981	837	3	0.174	0.0055291	0.03126	0.279581	101	6	0.174
ACVR1	12	0.29199	0.58765	0.999981	838	2	0.15719	0.076494	0.25298	0.642145	648	7	0.15719
BTLA	12	0.29251	0.58811	0.999981	839	3	0.10339	0.73939	0.90762	0.999998	1941	3	0.10339
NLGN1	12	0.29268	0.58827	0.999981	840	4	0.021264	0.39566	0.69172	0.999998	1484	4	0.021264
PDCD1	12	0.29354	0.58913	0.999981	841	3	0.12651	0.11001	0.32882	0.72713	807	6	0.12651
TSPAN33	12	0.29413	0.58977	0.999981	842	5	-0.058332	0.53685	0.79949	0.999998	1687	4	-0.058332
DummyGuide_1588	1	0.2944	0.29402	0.999981	843	1	-0.17678	0.7056	0.70534	0.999998	1909	0	-0.17678
EPHB3	12	0.29559	0.59115	0.999981	844	2	0.19511	0.074121	0.24737	0.636318	637	7	0.19511
KRT1	12	0.2962	0.59176	0.999981	845	4	-0.062431	0.19917	0.47354	0.869894	1100	4	-0.062431
DummyGuide_1812	1	0.29776	0.29749	0.999981	846	1	-0.21414	0.70224	0.70209	0.999998	1905	0	-0.21414
TMCO3	12	0.29849	0.59418	0.999981	847	5	0.0094288	0.059286	0.21036	0.587347	551	5	0.0094288
ATF6B	12	0.2992	0.59489	0.999981	848	4	-0.041298	0.8136	0.93418	0.999998	2008	1	-0.041298
DummyGuide_1162	1	0.29935	0.29897	0.999981	849	1	-0.21248	0.70065	0.7005	0.999998	1903	0	-0.21248
GABRA2	12	0.30034	0.59613	0.999981	850	5	0.046447	0.035122	0.14464	0.504266	389	3	0.046447
DummyGuide_1324	1	0.30047	0.30012	0.999981	851	1	-0.23815	0.69953	0.69939	0.999998	1901	0	-0.23815
PLP2	12	0.3007	0.5965	0.999981	852	5	0.12417	0.071423	0.24093	0.63525	617	5	0.12417
CNTNAP1	12	0.30132	0.59704	0.999981	853	5	-0.13888	0.87582	0.95889	0.999998	2080	3	-0.13888
CDH4	12	0.30375	0.59953	0.999981	854	4	0.25762	0.025689	0.11179	0.456903	313	7	0.25762
SLC4A2	12	0.30595	0.60166	0.999981	855	3	0.014598	0.40224	0.69743	0.999998	1493	5	0.014598
COL5A1	12	0.30618	0.60195	0.999981	856	4	-0.062046	0.36691	0.66486	0.993891	1435	2	-0.062046
TIGIT	12	0.30628	0.60206	0.999981	857	5	-0.11257	0.039899	0.15988	0.52415	434	4	-0.11257
PCDHGC3	2	0.30686	0.34445	0.999981	858	1	0.096847	0.055811	0.098708	0.435251	526	1	0.096847
NLGN2	12	0.30755	0.60326	0.999981	859	5	0.24183	0.015361	0.07366	0.386128	219	6	0.24183
PRSS23	12	0.3078	0.60345	0.999981	860	2	0.1887	0.086403	0.27592	0.667373	698	7	0.1887
NKTR	12	0.30788	0.60351	0.999981	861	5	-0.14218	0.89498	0.96489	0.999998	2114	2	-0.14218
CR2	12	0.30891	0.60452	0.999981	862	4	-0.017165	0.38509	0.68202	0.99978	1470	5	-0.017165
GPR174	12	0.30918	0.60477	0.999981	863	2	0.11454	0.22141	0.50565	0.891561	1163	5	0.11454
PCDH7	12	0.30998	0.60561	0.999981	864	5	0.010724	0.11482	0.33908	0.741002	826	4	0.010724
TSPAN9	12	0.31038	0.60603	0.999981	865	5	-0.056291	0.6405	0.8579	0.999998	1817	3	-0.056291
DummyGuide_1191	1	0.31043	0.30975	0.999981	866	1	-0.16115	0.68957	0.6895	0.999998	1894	0	-0.16115
VASN	12	0.31127	0.6069	0.999981	867	4	0.06447	0.20273	0.47882	0.873772	1110	6	0.06447
DummyGuide_1593	1	0.31149	0.31079	0.999981	868	1	-0.17939	0.68851	0.68831	0.999998	1892	0	-0.17939
PGAP1	12	0.31163	0.6073	0.999981	869	5	-0.068008	0.62849	0.85099	0.999998	1798	4	-0.068008
CAPNS1	12	0.31224	0.60794	0.999981	870	5	0.10089	0.24828	0.54301	0.916925	1234	5	0.10089
PXDC1	12	0.31241	0.60811	0.999981	871	5	0.089064	0.43268	0.72462	0.999998	1534	4	0.089064
CD40	12	0.31283	0.6085	0.999981	872	4	0.064591	0.15004	0.39774	0.796853	950	5	0.064591
BTD	12	0.31322	0.6089	0.999981	873	5	0.14271	0.2467	0.54084	0.915884	1227	6	0.14271
SLC15A3	12	0.31324	0.60891	0.999981	874	5	-0.15983	0.87667	0.95916	0.999998	2082	3	-0.15983
LNPEP	12	0.31338	0.60904	0.999981	875	5	-0.061184	0.67741	0.87862	0.999998	1868	4	-0.061184
GPC4	12	0.31381	0.60949	0.999981	876	3	0.31594	0.0065978	0.036518	0.297525	118	7	0.31594
DummyGuide_1951	1	0.3139	0.31331	0.999981	877	1	-0.1859	0.6861	0.686	0.999998	1887	0	-0.1859
POSTN	12	0.31409	0.60972	0.999981	878	2	0.21503	0.070493	0.23845	0.630142	615	7	0.21503
GNPTAB	12	0.31681	0.61253	0.999981	879	5	-0.11207	0.39111	0.68756	0.999998	1478	1	-0.11207
ANO5	12	0.31683	0.61255	0.999981	880	2	0.20579	0.025255	0.11015	0.454288	309	6	0.20579
PROM2	12	0.31782	0.61353	0.999981	881	4	0.047064	0.41692	0.71097	0.999998	1516	4	0.047064
C12orf49	12	0.31825	0.61406	0.999981	882	3	0.31182	0.010985	0.056396	0.347509	172	7	0.31182
DummyGuide_1957	1	0.31938	0.3189	0.999981	883	1	-0.1979	0.68062	0.68056	0.9989	1877	0	-0.1979
DummyGuide_1780	1	0.31985	0.31936	0.999981	884	1	-0.18377	0.68015	0.68005	0.998769	1876	0	-0.18377
DummyGuide_1521	1	0.32062	0.3202	0.999981	885	1	-0.15272	0.67938	0.67919	0.998769	1874	0	-0.15272
DummyGuide_1568	1	0.3208	0.32032	0.999981	886	1	-0.16221	0.6792	0.67902	0.998769	1873	0	-0.16221
GLG1	12	0.3213	0.61691	0.999981	887	2	0.1942	0.02848	0.12156	0.463082	342	8	0.1942
DummyGuide_1810	1	0.3215	0.32105	0.999981	888	1	-0.19536	0.6785	0.67842	0.998769	1872	0	-0.19536
DummyGuide_1807	1	0.32156	0.3211	0.999981	889	1	-0.16414	0.67844	0.67836	0.998769	1870	0	-0.16414
SLITRK6	12	0.3218	0.6174	0.999981	890	2	0.21372	0.034624	0.14295	0.502102	386	8	0.21372
LAMP1	12	0.32229	0.61785	0.999981	891	3	0.095485	0.09862	0.30395	0.697114	754	5	0.095485
DummyGuide_1966	1	0.32262	0.32221	0.999981	892	1	-0.1667	0.67738	0.67733	0.998769	1867	0	-0.1667
TMEM63A	12	0.32279	0.61839	0.999981	893	4	0.10131	0.31776	0.61891	0.965465	1365	5	0.10131
FLT1	12	0.32427	0.61987	0.999981	894	4	0.15047	0.072785	0.24409	0.63535	625	6	0.15047
DummyGuide_1048	1	0.32733	0.32682	0.999981	895	1	-0.15198	0.67267	0.67281	0.996886	1864	0	-0.15198
DCBLD1	12	0.32813	0.62366	0.999981	896	5	-0.036047	0.89881	0.96578	0.999998	2117	2	-0.036047
ST3GAL1	12	0.32878	0.62434	0.999981	897	3	0.046451	0.10838	0.32536	0.725641	802	4	0.046451
CD38	12	0.32994	0.62545	0.999981	898	4	-0.066994	0.31191	0.61326	0.96151	1359	5	-0.066994
ITGB1	12	0.33017	0.62566	0.999981	899	4	0.15356	0.2431	0.53601	0.913974	1213	6	0.15356
DummyGuide_1831	1	0.33034	0.32975	0.999981	900	1	-0.14479	0.66966	0.66997	0.994811	1860	0	-0.14479
FOLR1	12	0.3304	0.62587	0.999981	901	4	-0.031078	0.073508	0.24585	0.63535	634	4	-0.031078
KIAA1549	12	0.332	0.62734	0.999981	902	5	-0.068109	0.3287	0.62925	0.972388	1377	4	-0.068109
GRN	12	0.33266	0.62801	0.999981	903	5	-0.088986	0.76922	0.91803	0.999998	1967	2	-0.088986
MET	12	0.33286	0.62819	0.999981	904	3	0.27749	0.016962	0.079721	0.401001	236	7	0.27749
SLC12A9	12	0.3331	0.62845	0.999981	905	3	0.035204	0.24962	0.5449	0.918219	1238	6	0.035204
DummyGuide_1276	1	0.33334	0.3328	0.999981	906	1	-0.13526	0.66666	0.66701	0.994811	1856	0	-0.13526
ABI3BP	12	0.33427	0.62956	0.999981	907	5	-0.03654	0.47719	0.76258	0.999998	1611	3	-0.03654
MPO	12	0.33579	0.63103	0.999981	908	5	-0.06283	0.60433	0.8375	0.999998	1765	3	-0.06283
SERPINI1	12	0.33796	0.63331	0.999981	909	4	-0.058955	0.67779	0.87883	0.999998	1869	2	-0.058955
MFGE8	12	0.34069	0.6362	0.999981	910	5	-0.091696	0.53377	0.79785	0.999998	1680	2	-0.091696
DummyGuide_1363	1	0.34194	0.34172	0.999981	911	1	-0.14409	0.65806	0.6585	0.988715	1845	0	-0.14409
DummyGuide_1576	1	0.3423	0.34213	0.999981	912	1	-0.1716	0.6577	0.65821	0.988715	1844	0	-0.1716
MFAP4	12	0.34235	0.63785	0.999981	913	2	0.20676	0.035618	0.14627	0.507557	394	8	0.20676
DummyGuide_1187	1	0.34383	0.34378	0.999981	914	1	-0.18814	0.65617	0.6567	0.988005	1840	0	-0.18814
GPR65	12	0.34452	0.63978	0.999981	915	4	0.13925	0.13833	0.37905	0.777163	920	6	0.13925
SYPL1	12	0.34457	0.63984	0.999981	916	5	0.10259	0.22135	0.50557	0.891561	1162	5	0.10259
CHST3	12	0.34615	0.64117	0.999981	917	4	0.0035291	0.33838	0.63829	0.976614	1395	3	0.0035291
PROM1	12	0.34723	0.64236	0.999981	918	5	-0.1093	0.58968	0.82913	0.999998	1744	3	-0.1093
DummyGuide_1081	1	0.34766	0.34722	0.999981	919	1	-0.1227	0.65234	0.65277	0.984617	1837	0	-0.1227
DummyGuide_1222	1	0.34807	0.34767	0.999981	920	1	-0.1446	0.65193	0.65234	0.9846	1835	0	-0.1446
DummyGuide_1786	1	0.34966	0.3492	0.999981	921	1	-0.13103	0.65034	0.65076	0.983853	1834	0	-0.13103
PCDHGA8	12	0.34972	0.64477	0.999981	922	4	0.12824	0.046232	0.17668	0.548521	472	6	0.12824
PROCR	12	0.34997	0.64502	0.999981	923	4	-0.08905	0.69374	0.88731	0.999998	1895	4	-0.08905
SEMA4B	12	0.35139	0.64638	0.999981	924	4	0.029573	0.70626	0.89432	0.999998	1910	4	0.029573
ERAP2	12	0.35183	0.64677	0.999981	925	4	0.11629	0.16287	0.41775	0.820103	987	6	0.11629
CDH9	12	0.35209	0.64703	0.999981	926	4	-0.00035726	0.78146	0.92255	0.999998	1978	3	-0.00035726
ADRA2C	12	0.3529	0.64787	0.999981	927	5	0.2633	0.021732	0.097736	0.435251	281	7	0.2633
ADAM15	12	0.35357	0.64851	0.999981	928	5	-0.076424	0.46594	0.7532	0.999998	1591	4	-0.076424
SLC26A2	12	0.35399	0.64891	0.999981	929	5	-0.029656	0.41272	0.70712	0.999998	1507	3	-0.029656
SLC43A1	12	0.3548	0.64979	0.999981	930	5	-0.1404	0.635	0.85487	0.999998	1810	4	-0.1404
NTRK3	12	0.35507	0.65006	0.999981	931	5	-0.053307	0.48385	0.76802	0.999998	1624	5	-0.053307
CTSA	12	0.35519	0.65015	0.999981	932	5	-0.010792	0.38051	0.67785	0.998769	1463	5	-0.010792
SDK2	12	0.35611	0.65112	0.999981	933	4	0.0024402	0.0585	0.20852	0.58535	546	5	0.0024402
DummyGuide_1625	1	0.35638	0.35582	0.999981	934	1	-0.14179	0.64362	0.64395	0.9771	1824	0	-0.14179
HSD11B1	12	0.35692	0.65194	0.999981	935	4	0.057251	0.05016	0.1874	0.561925	494	4	0.057251
DummyGuide_1606	1	0.35738	0.35678	0.999981	936	1	-0.1191	0.64262	0.64288	0.976614	1821	0	-0.1191
SLC44A1	12	0.35755	0.65251	0.999981	937	3	0.17297	0.099135	0.30522	0.697991	758	7	0.17297
DummyGuide_1808	1	0.35773	0.35705	0.999981	938	1	-0.12031	0.64227	0.64253	0.976614	1820	0	-0.12031
ADAM10	12	0.35775	0.65269	0.999981	939	5	-0.029551	0.020656	0.093732	0.429117	272	2	-0.029551
MAN2B2	12	0.35804	0.65299	0.999981	940	2	0.17656	0.10101	0.30932	0.702563	773	7	0.17656
DummyGuide_1889	1	0.35867	0.358	0.999981	941	1	-0.14631	0.64133	0.64163	0.976614	1818	0	-0.14631
SLC45A2	12	0.35881	0.65373	0.999981	942	4	0.12345	0.056787	0.20429	0.5813	537	5	0.12345
DummyGuide_1467	1	0.36015	0.35947	0.999981	943	1	-0.12226	0.63985	0.64014	0.976614	1816	0	-0.12226
CD47	12	0.36077	0.65558	0.999981	944	5	-0.018005	0.72498	0.90288	0.999998	1932	3	-0.018005
GAA	12	0.36111	0.65592	0.999981	945	5	-0.09413	0.13845	0.37928	0.777163	921	4	-0.09413
DummyGuide_1290	1	0.3615	0.36072	0.999981	946	1	-0.12296	0.6385	0.63868	0.976614	1815	0	-0.12296
CD244	12	0.36155	0.65632	0.999981	947	3	0.025718	0.83552	0.94283	0.999998	2031	1	0.025718
SERINC1	12	0.36219	0.65692	0.999981	948	5	-0.097	0.64852	0.86234	0.999998	1832	3	-0.097
EPHB1	12	0.36262	0.65735	0.999981	949	5	0.01449	0.17993	0.44425	0.843496	1041	3	0.01449
FGFR3	12	0.36288	0.65761	0.999981	950	4	-0.039038	0.322	0.62288	0.969479	1369	5	-0.039038
DummyGuide_1052	1	0.36539	0.36461	0.999981	951	1	-0.11005	0.63461	0.63474	0.975624	1809	0	-0.11005
PCDH9	12	0.36585	0.66037	0.999981	952	4	-0.076214	0.9467	0.97852	0.999998	2185	1	-0.076214
SLC6A6	12	0.36673	0.66127	0.999981	953	4	-0.012017	0.097472	0.30128	0.694632	749	4	-0.012017
ATRN	12	0.36733	0.66185	0.999981	954	5	-0.099161	0.17019	0.42936	0.826969	1017	5	-0.099161
ADCY7	12	0.368	0.66253	0.999981	955	5	-0.039487	0.53626	0.79915	0.999998	1686	3	-0.039487
IL17RA	12	0.36868	0.66318	0.999981	956	5	-0.086412	0.68516	0.88291	0.999998	1884	3	-0.086412
DummyGuide_1589	1	0.36887	0.36821	0.999981	957	0	-0.10188	0.63113	0.63139	0.972388	1803	0	-0.10188
DummyGuide_1315	1	0.36892	0.36826	0.999981	958	0	-0.12545	0.63108	0.63135	0.972388	1802	0	-0.12545
STT3A	12	0.36949	0.66406	0.999981	959	4	-0.10737	0.81919	0.9363	0.999998	2017	2	-0.10737
DummyGuide_1011	1	0.36987	0.36913	0.999981	960	0	-0.1286	0.63013	0.63038	0.972388	1800	0	-0.1286
SIGLEC10	12	0.37106	0.66578	0.999981	961	4	-0.015284	0.14656	0.39238	0.791862	937	4	-0.015284
BCHE	12	0.372	0.66669	0.999981	962	1	0.065824	0.23015	0.51798	0.900399	1180	5	0.065824
DummyGuide_1708	1	0.37246	0.37162	0.999981	963	0	-0.13988	0.62754	0.62742	0.972388	1796	0	-0.13988
FGB	12	0.37256	0.66721	0.999981	964	5	0.015849	0.30324	0.60504	0.956841	1346	4	0.015849
KCNH2	12	0.37279	0.66743	0.999981	965	4	0.10306	0.18577	0.45348	0.851727	1063	5	0.10306
C1QTNF2	12	0.37339	0.66802	0.999981	966	3	0.24811	0.020396	0.092663	0.427367	268	8	0.24811
CHST7	12	0.37365	0.66822	0.999981	967	3	0.27022	0.011151	0.057072	0.349288	174	8	0.27022
CDH3	12	0.37385	0.66845	0.999981	968	3	0.070953	0.20692	0.48472	0.876685	1128	5	0.070953
SLC38A1	12	0.37391	0.66849	0.999981	969	5	0.043106	0.03013	0.1274	0.468789	361	6	0.043106
HHLA2	12	0.375	0.66963	0.999981	970	4	0.088248	0.14898	0.39624	0.796558	946	5	0.088248
TM2D3	12	0.37523	0.66985	0.999981	971	3	-0.015647	0.83956	0.94439	0.999998	2038	3	-0.015647
DummyGuide_1929	1	0.37558	0.37485	0.999981	972	0	-0.11821	0.62442	0.62413	0.969487	1790	0	-0.11821
LMBRD1	12	0.37579	0.67033	0.999981	973	4	0.013736	0.2828	0.58498	0.947618	1304	5	0.013736
KIAA1161	12	0.37611	0.67063	0.999981	974	4	0.03635	0.34007	0.64	0.976614	1400	4	0.03635
DummyGuide_1740	1	0.37623	0.37556	0.999981	975	0	-0.099126	0.62377	0.62343	0.969487	1789	0	-0.099126
CACNA2D2	12	0.3766	0.67109	0.999981	976	2	0.015667	0.081246	0.26397	0.657543	665	3	0.015667
ENPP3	12	0.37703	0.6715	0.999981	977	4	0.1467	0.076067	0.25205	0.642145	645	6	0.1467
DummyGuide_1583	1	0.37859	0.37771	0.999981	978	0	-0.11066	0.62141	0.621	0.967189	1787	0	-0.11066
ANGPT1	12	0.37889	0.67324	0.999981	979	1	0.21081	0.0025339	0.015863	0.220019	57	6	0.21081
EFEMP1	12	0.37899	0.6734	0.999981	980	5	-0.043912	0.012797	0.063687	0.356282	192	4	-0.043912
DummyGuide_1405	1	0.37953	0.37869	0.999981	981	0	-0.11032	0.62047	0.61987	0.966067	1786	0	-0.11032
ITGA2	12	0.38145	0.67589	0.999981	982	4	0.0044003	0.62729	0.85032	0.999998	1795	4	0.0044003
RAET1G	12	0.38153	0.67596	0.999981	983	5	0.0023547	0.64634	0.86115	0.999998	1828	4	0.0023547
DummyGuide_1967	1	0.38206	0.38141	0.999981	984	0	-0.13364	0.61794	0.61747	0.964908	1784	0	-0.13364
DummyGuide_1382	1	0.38295	0.38228	0.999981	985	0	-0.092215	0.61705	0.61655	0.964105	1783	0	-0.092215
SLC12A2	12	0.38299	0.67725	0.999981	986	2	0.10125	0.28275	0.58493	0.947618	1303	5	0.10125
ITPR1	12	0.38357	0.67784	0.999981	987	5	-0.049049	0.53589	0.79897	0.999998	1685	3	-0.049049
FAM171A2	12	0.38374	0.67798	0.999981	988	5	-0.062286	0.55598	0.81036	0.999998	1707	2	-0.062286
SERPINF1	12	0.38384	0.67806	0.999981	989	5	-0.0048417	0.41404	0.70833	0.999998	1511	3	-0.0048417
SCARB1	12	0.38421	0.67838	0.999981	990	4	0.20021	0.034898	0.14385	0.503258	387	6	0.20021
PTGFRN	12	0.38424	0.67841	0.999981	991	5	0.046284	0.66068	0.8691	0.999998	1850	4	0.046284
SUCNR1	12	0.38457	0.67871	0.999981	992	5	0.040069	0.32651	0.62716	0.972388	1373	4	0.040069
PLD4	12	0.38515	0.67931	0.999981	993	2	-0.0080956	0.086501	0.27617	0.667373	699	4	-0.0080956
DummyGuide_1591	1	0.3856	0.38498	0.999981	994	0	-0.10443	0.6144	0.61395	0.96151	1779	0	-0.10443
TSPAN3	12	0.38595	0.68013	0.999981	995	3	0.23936	0.035698	0.14655	0.507557	395	8	0.23936
STEAP4	12	0.38675	0.68094	0.999981	996	3	0.10029	0.25775	0.55592	0.924229	1255	5	0.10029
SPANXB1	12	0.38747	0.68162	0.999981	997	5	0.062381	0.048879	0.18397	0.556416	488	4	0.062381
STIM1	12	0.38752	0.68165	0.999981	998	5	-0.044112	0.55562	0.8102	0.999998	1706	3	-0.044112
DummyGuide_1264	1	0.38854	0.38808	0.999981	999	0	-0.098996	0.61146	0.61083	0.959206	1776	0	-0.098996
TSHR	12	0.38968	0.68368	0.999981	1000	5	0.16235	0.037732	0.1534	0.512924	415	6	0.16235
EPHA1	12	0.39054	0.68442	0.999981	1001	5	-0.15002	0.57988	0.82368	0.999998	1730	3	-0.15002
DummyGuide_1178	1	0.39084	0.39028	0.999981	1002	0	-0.080193	0.60916	0.60868	0.958836	1771	0	-0.080193
MFAP3L	12	0.39111	0.685	0.999981	1003	2	0.41201	0.00090031	0.0063212	0.193133	24	8	0.41201
IL1RL2	12	0.39156	0.68543	0.999981	1004	5	-0.071838	0.27005	0.57247	0.935757	1284	5	-0.071838
CD96	12	0.39175	0.68559	0.999981	1005	5	0.031011	0.084547	0.27169	0.662692	689	5	0.031011
CD4	12	0.39207	0.68598	0.999981	1006	5	0.083587	0.20495	0.48189	0.874456	1117	6	0.083587
BST2	12	0.39241	0.68627	0.999981	1007	5	-0.041945	0.060799	0.21428	0.593095	564	4	-0.041945
PCDHGC5	12	0.39246	0.68631	0.999981	1008	3	0.11868	0.29174	0.59393	0.952672	1319	4	0.11868
MDGA1	12	0.39291	0.68673	0.999981	1009	3	0.0204	0.50995	0.78435	0.999998	1656	4	0.0204
YWHAQ	12	0.39343	0.68726	0.999981	1010	5	0.15208	0.12322	0.35445	0.754428	871	6	0.15208
CXCL16	12	0.3938	0.68758	0.999981	1011	3	-0.0086261	0.72088	0.90152	0.999998	1928	2	-0.0086261
DummyGuide_1993	1	0.3942	0.39366	0.999981	1012	0	-0.10368	0.6058	0.60529	0.956841	1767	0	-0.10368
EFNB1	12	0.39469	0.68841	0.999981	1013	3	0.157	0.12076	0.35035	0.750751	859	6	0.157
PRG2	12	0.3948	0.6885	0.999981	1014	5	-0.1422	0.51961	0.78999	0.999998	1664	4	-0.1422
GALNT1	12	0.39497	0.68863	0.999981	1015	5	-0.01841	0.22493	0.51077	0.893465	1173	5	-0.01841
SEZ6L2	12	0.39531	0.68896	0.999981	1016	5	-0.10841	0.75253	0.912	0.999998	1952	2	-0.10841
EVI2A	12	0.39559	0.68921	0.999981	1017	2	0.14723	0.076511	0.25301	0.642145	649	7	0.14723
A2M	12	0.39648	0.69005	0.999981	1018	2	0.1216	0.027403	0.11788	0.46033	331	6	0.1216
ITGB3	12	0.3965	0.69009	0.999981	1019	5	-0.057306	0.75835	0.91423	0.999998	1956	2	-0.057306
DummyGuide_1883	1	0.39756	0.39698	0.999981	1020	0	-0.10826	0.60244	0.60202	0.955235	1761	0	-0.10826
DummyGuide_1582	1	0.39814	0.39759	0.999981	1021	0	-0.095189	0.60186	0.60145	0.95514	1759	0	-0.095189
A4GALT	12	0.39871	0.69218	0.999981	1022	4	-0.002602	0.30354	0.60537	0.956841	1347	5	-0.002602
IL2RG	12	0.39889	0.69233	0.999981	1023	5	-0.12892	0.60459	0.83767	0.999998	1766	4	-0.12892
DummyGuide_1266	1	0.3992	0.3985	0.999981	1024	0	-0.087999	0.6008	0.60041	0.954197	1756	0	-0.087999
PLXNA2	12	0.39977	0.69301	0.999981	1025	3	0.23713	0.0056043	0.031619	0.280734	103	9	0.23713
PLAT	12	0.39991	0.69316	0.999981	1026	4	0.1313	0.25241	0.54879	0.919155	1246	6	0.1313
BDNF	12	0.40179	0.69488	0.999981	1027	3	0.075045	0.38218	0.6794	0.998769	1466	4	0.075045
FCRL3	12	0.40213	0.69513	0.999981	1028	5	-0.10691	0.89032	0.9639	0.999998	2106	1	-0.10691
DummyGuide_1380	1	0.40244	0.40163	0.999981	1029	0	-0.12438	0.59756	0.59694	0.953933	1752	0	-0.12438
ADAM8	12	0.40282	0.69574	0.999981	1030	5	0.17939	0.095994	0.29781	0.694451	740	7	0.17939
DummyGuide_1869	1	0.40356	0.40269	0.999981	1031	0	-0.0841	0.59644	0.59581	0.953296	1750	0	-0.0841
DummyGuide_1866	1	0.40521	0.40436	0.999981	1032	0	-0.083115	0.59479	0.5942	0.952672	1748	0	-0.083115
AREG	12	0.40556	0.69861	0.999981	1033	5	-0.028204	0.26186	0.56179	0.929139	1265	5	-0.028204
SEMA7A	12	0.40659	0.69947	0.999981	1034	5	-0.054176	0.4349	0.72647	0.999998	1537	4	-0.054176
DummyGuide_1525	1	0.40804	0.40739	0.999981	1035	0	-0.080515	0.59196	0.5914	0.952178	1747	0	-0.080515
VTN	12	0.40916	0.70202	0.999981	1036	4	0.041412	0.21955	0.50299	0.889764	1158	3	0.041412
GABRB3	12	0.41009	0.70285	0.999981	1037	3	0.018332	0.08164	0.26488	0.658531	668	5	0.018332
DummyGuide_1887	1	0.41146	0.41075	0.999981	1038	0	-0.065328	0.58854	0.58787	0.949012	1742	0	-0.065328
ITGB6	12	0.41272	0.70526	0.999981	1039	4	-0.0089989	0.48138	0.76601	0.999998	1620	4	-0.0089989
SLCO3A1	12	0.41274	0.70527	0.999981	1040	2	0.03489	0.27268	0.57521	0.938262	1290	5	0.03489
DummyGuide_1751	1	0.41328	0.41257	0.999981	1041	0	-0.081567	0.58672	0.58613	0.948823	1739	0	-0.081567
CD3G	12	0.41404	0.7065	0.999981	1042	4	0.17636	0.085577	0.27407	0.665022	695	6	0.17636
ENG	12	0.41515	0.70756	0.999981	1043	5	0.062964	0.063176	0.22045	0.603665	582	4	0.062964
VWF	12	0.41533	0.7077	0.999981	1044	5	0.03072	0.33017	0.63056	0.972388	1384	4	0.03072
OLFM1	12	0.4162	0.70851	0.999981	1045	4	0.10314	0.14394	0.38821	0.788523	930	6	0.10314
DummyGuide_1504	1	0.41705	0.41636	0.999981	1046	0	-0.073141	0.58295	0.58242	0.944763	1735	0	-0.073141
FKTN	12	0.41738	0.70963	0.999981	1047	5	-0.10383	0.97672	0.98868	0.999998	2236	1	-0.10383
TGFBR3	12	0.41805	0.71022	0.999981	1048	4	0.051601	0.37357	0.67132	0.9953	1450	5	0.051601
DummyGuide_1386	1	0.41829	0.4177	0.999981	1049	0	-0.077567	0.58171	0.58117	0.944056	1732	0	-0.077567
SGCE	12	0.41893	0.71108	0.999981	1050	5	0.10123	0.19902	0.47332	0.869894	1097	6	0.10123
TNFRSF9	12	0.41956	0.71174	0.999981	1051	4	0.21728	0.060815	0.21431	0.593095	565	7	0.21728
SLC22A16	12	0.4199	0.71207	0.999981	1052	4	0.040332	0.60068	0.83543	0.999998	1755	2	0.040332
FGA	12	0.42006	0.71221	0.999981	1053	2	0.16772	0.13848	0.37934	0.777163	922	6	0.16772
SLC5A3	12	0.4212	0.71319	0.999981	1054	4	0.035568	0.002423	0.015251	0.220019	54	6	0.035568
SLC11A2	12	0.42254	0.71436	0.999981	1055	5	-0.10861	0.75182	0.9118	0.999998	1951	3	-0.10861
APLP1	12	0.42435	0.71597	0.999981	1056	3	0.050248	0.4652	0.75253	0.999998	1588	4	0.050248
TMEM132B	12	0.42439	0.71599	0.999981	1057	3	0.036899	0.6862	0.88343	0.999998	1889	4	0.036899
DummyGuide_1253	1	0.42507	0.42419	0.999981	1058	0	-0.063322	0.57493	0.57408	0.937734	1728	0	-0.063322
ST3GAL6	12	0.42638	0.71781	0.999981	1059	4	-0.025333	0.11977	0.34858	0.749609	852	4	-0.025333
TNFRSF1A	12	0.42675	0.7182	0.999981	1060	4	-0.04007	0.11409	0.33748	0.74031	823	5	-0.04007
CSPG5	12	0.4269	0.71829	0.999981	1061	4	-0.080161	0.99743	0.99729	0.999998	2300	0	-0.080161
SLC6A2	12	0.42732	0.71869	0.999981	1062	3	0.088441	0.12078	0.35039	0.750751	860	6	0.088441
CD101	12	0.42855	0.71975	0.999981	1063	5	-0.041784	0.95919	0.98296	0.999998	2205	2	-0.041784
PCDHGA9	12	0.42986	0.72088	0.999981	1064	2	0.14821	0.115	0.33952	0.741002	829	7	0.14821
GFRA1	12	0.43027	0.72128	0.999981	1065	5	0.063593	0.70221	0.89218	0.999998	1904	4	0.063593
DummyGuide_1159	1	0.43072	0.42969	0.999981	1066	0	-0.066722	0.56928	0.56845	0.932429	1724	0	-0.066722
SLCO2A1	12	0.43083	0.72179	0.999981	1067	4	0.022215	0.87726	0.95939	0.999998	2083	3	0.022215
ASAH1	12	0.43113	0.72203	0.999981	1068	1	0.20599	0.05496	0.19966	0.579129	520	7	0.20599
IL1RAP	12	0.43165	0.72248	0.999981	1069	5	0.075742	0.22152	0.50588	0.891561	1164	6	0.075742
DummyGuide_1767	1	0.43166	0.43053	0.999981	1070	0	-0.051775	0.56834	0.56759	0.93232	1723	0	-0.051775
SLC19A2	12	0.43182	0.72266	0.999981	1071	5	-0.052867	0.65211	0.8644	0.999998	1836	4	-0.052867
DummyGuide_1032	1	0.43343	0.43232	0.999981	1072	0	-0.056052	0.56657	0.5658	0.931898	1721	0	-0.056052
DummyGuide_1882	1	0.43496	0.43393	0.999981	1073	0	-0.061983	0.56504	0.56443	0.930397	1718	0	-0.061983
CD37	12	0.43527	0.72565	0.999981	1074	5	0.11279	0.38934	0.68599	0.999998	1475	5	0.11279
CYBB	12	0.43591	0.72623	0.999981	1075	4	-0.014805	0.18299	0.44911	0.846228	1054	3	-0.014805
DummyGuide_1656	1	0.43673	0.43559	0.999981	1076	0	-0.056513	0.56327	0.56258	0.929308	1715	0	-0.056513
ABCA7	12	0.43716	0.72728	0.999981	1077	5	-0.048145	0.19686	0.46997	0.867401	1093	5	-0.048145
DummyGuide_1557	1	0.43773	0.43667	0.999981	1078	0	-0.044259	0.56227	0.56155	0.929139	1714	0	-0.044259
DummyGuide_1007	1	0.43814	0.43704	0.999981	1079	0	-0.050115	0.56186	0.56111	0.929139	1713	0	-0.050115
SLC2A9	12	0.43842	0.72833	0.999981	1080	4	0.12808	0.10391	0.31566	0.712828	782	5	0.12808
DDR2	12	0.43916	0.72902	0.999981	1081	4	0.0014881	0.75774	0.914	0.999998	1955	2	0.0014881
DummyGuide_1801	1	0.43932	0.43822	0.999981	1082	0	-0.04662	0.56068	0.55978	0.927952	1712	0	-0.04662
HHIP	12	0.43974	0.72956	0.999981	1083	5	-0.045605	0.33953	0.63946	0.976614	1397	5	-0.045605
MPZ	12	0.44008	0.72981	0.999981	1084	5	0.12642	0.44939	0.73915	0.999998	1560	5	0.12642
DummyGuide_1994	1	0.44044	0.43923	0.999981	1085	0	-0.062826	0.55956	0.55868	0.927436	1710	0	-0.062826
P2RX1	12	0.44116	0.73073	0.999981	1086	4	-0.001418	0.26687	0.56813	0.932429	1276	4	-0.001418
CDH19	12	0.44197	0.73148	0.999981	1087	4	0.025429	0.84866	0.94795	0.999998	2047	2	0.025429
PTPRD	12	0.44199	0.7315	0.999981	1088	1	0.077473	0.56412	0.81497	0.999998	1717	4	0.077473
S1PR2	12	0.4423	0.73179	0.999981	1089	4	0.054867	0.063504	0.22138	0.604785	587	4	0.054867
ATP6V0A2	12	0.44241	0.73192	0.999981	1090	4	-0.11519	0.99543	0.9953	0.999998	2289	1	-0.11519
RHBDF2	12	0.44439	0.73377	0.999981	1091	5	-0.015315	0.38764	0.6845	0.999998	1474	5	-0.015315
DummyGuide_1126	1	0.44451	0.44355	0.999981	1092	0	-0.039018	0.55549	0.55452	0.923864	1705	0	-0.039018
TMEM30B	12	0.44488	0.73426	0.999981	1093	4	-0.05462	0.75866	0.91434	0.999998	1957	3	-0.05462
SCNN1D	12	0.44508	0.73449	0.999981	1094	5	-0.013549	0.60733	0.83922	0.999998	1769	3	-0.013549
FN1	12	0.4451	0.73449	0.999981	1095	3	0.0077136	0.12764	0.36176	0.763173	885	5	0.0077136
IL6ST	12	0.44526	0.73465	0.999981	1096	4	-0.0050291	0.50446	0.78109	0.999998	1650	3	-0.0050291
CNNM2	12	0.44614	0.7354	0.999981	1097	4	-0.045289	0.5276	0.7945	0.999998	1674	4	-0.045289
ICAM5	12	0.44694	0.73611	0.999981	1098	3	0.087337	0.43406	0.72577	0.999998	1535	5	0.087337
COL2A1	12	0.44776	0.73689	0.999981	1099	4	0.079078	0.24739	0.54192	0.915884	1230	6	0.079078
DummyGuide_1322	1	0.44828	0.44725	0.999981	1100	0	-0.038875	0.55172	0.55056	0.920654	1704	0	-0.038875
P2RY10	12	0.44877	0.73776	0.999981	1101	4	0.15362	0.03411	0.1411	0.496588	382	6	0.15362
FCRL6	12	0.44939	0.73839	0.999981	1102	5	0.00051334	0.48798	0.77145	0.999998	1631	4	0.00051334
AMIGO1	12	0.44951	0.73846	0.999981	1103	4	-0.022738	0.67117	0.87491	0.999998	1862	4	-0.022738
AQP1	12	0.44968	0.73861	0.999981	1104	4	-0.027209	0.4395	0.73031	0.999998	1545	4	-0.027209
DummyGuide_1745	1	0.44987	0.44883	0.999981	1105	0	-0.039295	0.55013	0.54898	0.919155	1702	0	-0.039295
DummyGuide_1815	1	0.4501	0.44908	0.999981	1106	0	-0.044335	0.5499	0.54876	0.919155	1701	0	-0.044335
DummyGuide_1880	1	0.45034	0.4493	0.999981	1107	0	-0.043283	0.54966	0.54851	0.919155	1700	0	-0.043283
BACE1	12	0.45038	0.73919	0.999981	1108	3	0.10703	0.022042	0.098928	0.435251	283	5	0.10703
ACHE	12	0.45072	0.7395	0.999981	1109	4	-0.013029	0.89144	0.96414	0.999998	2109	1	-0.013029
PLBD2	12	0.45238	0.74106	0.999981	1110	4	-0.11858	0.42522	0.71815	0.999998	1527	4	-0.11858
HLA-DQB2	12	0.45422	0.74268	0.999981	1111	4	-0.010546	0.46567	0.75293	0.999998	1589	4	-0.010546
TRPC6	12	0.45646	0.74466	0.999981	1112	5	-0.099123	0.94646	0.97845	0.999998	2184	1	-0.099123
DummyGuide_1618	1	0.45664	0.45573	0.999981	1113	0	-0.03364	0.54336	0.54195	0.915884	1694	0	-0.03364
DummyGuide_1318	1	0.4567	0.45582	0.999981	1114	0	-0.039752	0.5433	0.54191	0.915884	1693	0	-0.039752
DummyGuide_1981	1	0.45711	0.45617	0.999981	1115	0	-0.038171	0.54289	0.54145	0.915884	1691	0	-0.038171
HLA-DRA	12	0.45799	0.74615	0.999981	1116	4	-0.03013	0.45129	0.74073	0.999998	1563	5	-0.03013
SPPL2A	12	0.45914	0.74701	0.999981	1117	2	0.049582	0.39207	0.68851	0.999998	1481	5	0.049582
DummyGuide_1328	1	0.45935	0.45838	0.999981	1118	0	-0.036013	0.54065	0.53926	0.915884	1689	0	-0.036013
ITGB8	12	0.45994	0.74771	0.999981	1119	2	0.32807	0.0079583	0.043099	0.307066	139	8	0.32807
DummyGuide_1042	1	0.46006	0.45916	0.999981	1120	0	-0.033079	0.53994	0.53849	0.915884	1688	0	-0.033079
ITFG1	12	0.46155	0.74906	0.999981	1121	3	0.10745	0.10963	0.32805	0.726965	804	6	0.10745
SLC1A3	12	0.46161	0.74909	0.999981	1122	3	0.097057	0.10982	0.32842	0.726965	805	5	0.097057
CD84	12	0.46225	0.74952	0.999981	1123	4	0.00042734	0.71171	0.89734	0.999998	1915	4	0.00042734
ST3GAL4	12	0.46296	0.74996	0.999981	1124	3	0.23577	0.03718	0.15162	0.511179	409	7	0.23577
PTPRZ1	12	0.46299	0.74998	0.999981	1125	4	0.13323	0.1004	0.30797	0.700851	770	6	0.13323
QSOX1	12	0.46339	0.75026	0.999981	1126	4	0.10511	0.18005	0.44442	0.843496	1043	5	0.10511
DummyGuide_1093	1	0.46536	0.46446	0.999981	1127	0	-0.028403	0.53464	0.53318	0.911769	1682	0	-0.028403
CCDC80	12	0.46592	0.7518	0.999981	1128	2	0.16828	0.090057	0.28442	0.676249	714	7	0.16828
NXPH4	12	0.46594	0.75182	0.999981	1129	4	-0.12816	0.31272	0.61407	0.96151	1360	3	-0.12816
JAG2	12	0.46792	0.75311	0.999981	1130	3	0.28684	0.011914	0.060198	0.354822	185	8	0.28684
DummyGuide_1036	1	0.46878	0.46765	0.999981	1131	0	-0.022764	0.53122	0.52997	0.908744	1678	0	-0.022764
DummyGuide_1925	1	0.46901	0.46785	0.999981	1132	0	-0.026552	0.53099	0.52972	0.908744	1677	0	-0.026552
TLL2	12	0.4704	0.75453	0.999981	1133	4	-0.069004	0.84791	0.94765	0.999998	2045	2	-0.069004
HEPACAM	12	0.47183	0.7553	0.999981	1134	4	0.028951	0.19574	0.46825	0.864909	1092	5	0.028951
DummyGuide_1912	1	0.47408	0.47307	0.999981	1135	0	-0.017151	0.52592	0.52481	0.903867	1672	0	-0.017151
EFNB3	12	0.47423	0.75681	0.999981	1136	1	0.23285	0.069332	0.23559	0.626664	610	7	0.23285
LRRC32	12	0.47495	0.75731	0.999981	1137	4	0.079023	0.12147	0.35151	0.751775	861	5	0.079023
DummyGuide_1251	1	0.47549	0.47448	0.999981	1138	0	-0.018774	0.52451	0.52353	0.902983	1670	0	-0.018774
LAMA3	12	0.47991	0.76006	0.999981	1139	4	0.15741	0.11269	0.33466	0.736564	815	6	0.15741
SGCD	12	0.48051	0.76039	0.999981	1140	2	0.021849	0.30066	0.6026	0.955235	1340	5	0.021849
DummyGuide_1872	1	0.48068	0.47955	0.999981	1141	0	-0.012295	0.51932	0.51819	0.900399	1662	0	-0.012295
DummyGuide_1772	1	0.48085	0.47976	0.999981	1142	0	-0.01631	0.51915	0.518	0.900399	1661	0	-0.01631
SERPINA1	12	0.48101	0.76075	0.999981	1143	4	0.14099	0.042565	0.16708	0.535606	447	5	0.14099
SLC12A6	12	0.48266	0.76167	0.999981	1144	4	0.026489	0.25508	0.55233	0.921916	1251	3	0.026489
PILRA	12	0.48318	0.76201	0.999981	1145	2	0.066209	0.1824	0.44811	0.845372	1051	3	0.066209
DummyGuide_1537	1	0.48445	0.48348	0.999981	1146	0	-0.010366	0.51555	0.5146	0.89748	1659	0	-0.010366
ADAM17	12	0.48665	0.76413	0.999981	1147	4	-0.046829	0.057618	0.20628	0.581841	541	4	-0.046829
PTPRB	12	0.4867	0.76415	0.999981	1148	4	0.070875	0.036489	0.14924	0.510696	401	5	0.070875
GPC5	12	0.48818	0.76509	0.999981	1149	2	0.29531	0.0049083	0.028189	0.269375	93	9	0.29531
FREM2	12	0.48968	0.76596	0.999981	1150	3	-0.080544	0.69826	0.89004	0.999998	1899	4	-0.080544
CD70	12	0.48981	0.76602	0.999981	1151	4	-0.025504	0.21472	0.49588	0.887958	1142	3	-0.025504
IL27RA	12	0.48988	0.76607	0.999981	1152	3	-0.044359	0.6184	0.84528	0.999998	1785	2	-0.044359
SIGLEC1	12	0.49085	0.76665	0.999981	1153	3	0.13415	0.20839	0.48698	0.87889	1132	6	0.13415
VNN1	12	0.49243	0.76759	0.999981	1154	2	0.076329	0.28983	0.59203	0.952442	1315	3	0.076329
ABCB1	12	0.49268	0.76772	0.999981	1155	3	0.1183	0.44181	0.73225	0.999998	1549	5	0.1183
SLC14A1	12	0.49293	0.76788	0.999981	1156	3	0.088258	0.20068	0.47576	0.871926	1104	5	0.088258
DummyGuide_1552	1	0.49305	0.49202	0.999981	1157	0	-0.0018846	0.50695	0.50599	0.891561	1655	0	-0.0018846
SLC7A1	12	0.4949	0.7692	0.999981	1158	4	0.074329	0.41601	0.71009	0.999998	1514	5	0.074329
CEACAM6	12	0.49578	0.76979	0.999981	1159	2	0.25105	0.047293	0.17962	0.552526	477	7	0.25105
DummyGuide_1596	1	0.49582	0.49489	0.999981	1160	0	-2.1445e-05	0.50418	0.5033	0.889764	1649	0	-2.1445e-05
PDGFRB	12	0.4964	0.77023	0.999981	1161	4	0.10246	0.41979	0.71357	0.999998	1518	5	0.10246
DummyGuide_1403	1	0.49918	0.49834	0.999981	1162	0	0.0029974	0.50082	0.5	0.887958	1647	0	0.0029974
DummyGuide_1168	1	0.50012	0.49925	0.999981	1163	0	0.0036945	0.49988	0.49901	0.887958	1644	0	0.0036945
DummyGuide_1110	1	0.50029	0.49941	0.999981	1164	0	0.0031623	0.49971	0.49887	0.887958	1643	0	0.0031623
ULBP2	12	0.50031	0.77238	0.999981	1165	4	0.13715	0.19094	0.46099	0.858121	1082	5	0.13715
DummyGuide_1867	1	0.50094	0.50015	0.999981	1166	0	0.0042358	0.49906	0.49818	0.887958	1642	0	0.0042358
DummyGuide_1875	1	0.50112	0.50035	0.999981	1167	0	0.0045706	0.49888	0.49799	0.887958	1641	0	0.0045706
FZD4	12	0.503	0.77413	0.999981	1168	3	0.24633	0.023691	0.10485	0.446127	295	8	0.24633
SUMF1	12	0.5047	0.77518	0.999981	1169	4	-0.052959	0.29665	0.59858	0.953933	1329	4	-0.052959
PTCH1	12	0.50471	0.77518	0.999981	1170	3	0.025809	0.52695	0.7941	0.999998	1673	3	0.025809
DummyGuide_1393	1	0.50589	0.50502	0.999981	1171	0	0.0074769	0.49411	0.4931	0.885812	1636	0	0.0074769
VNN2	12	0.50624	0.77609	0.999981	1172	4	0.027746	0.64367	0.85955	0.999998	1825	3	0.027746
ERO1A	12	0.50641	0.77619	0.999981	1173	3	0.031734	0.60171	0.83606	0.999998	1758	4	0.031734
TMX3	12	0.50661	0.77631	0.999981	1174	4	-0.096996	0.64717	0.86167	0.999998	1830	3	-0.096996
TPBG	12	0.50846	0.77753	0.999981	1175	3	0.15225	0.19917	0.47354	0.869894	1099	6	0.15225
FCGRT	12	0.50933	0.77815	0.999981	1176	3	-0.0016771	0.19408	0.46575	0.861921	1088	3	-0.0016771
CPZ	12	0.50982	0.77844	0.999981	1177	2	0.21148	0.049495	0.18559	0.558936	489	6	0.21148
DummyGuide_1179	1	0.51037	0.50951	0.999981	1178	0	0.0121	0.48963	0.48856	0.8798	1633	0	0.0121
DummyGuide_1989	1	0.51196	0.5111	0.999981	1179	0	0.015663	0.48804	0.48706	0.87889	1632	0	0.015663
FAM174A	12	0.51323	0.78052	0.999981	1180	3	0.29769	0.017575	0.082074	0.405909	241	7	0.29769
CRTAP	12	0.51345	0.78067	0.999981	1181	4	0.19692	0.043624	0.16984	0.540235	455	7	0.19692
DummyGuide_1755	1	0.51549	0.51453	0.999981	1182	0	0.017436	0.48451	0.48357	0.875282	1625	0	0.017436
SLC26A6	12	0.51562	0.78195	0.999981	1183	3	-0.014364	0.62873	0.85112	0.999998	1799	3	-0.014364
SLC6A11	12	0.51635	0.7824	0.999981	1184	3	0.05328	0.51491	0.7873	0.999998	1658	4	0.05328
TTYH3	12	0.51779	0.7834	0.999981	1185	2	0.099133	0.41283	0.70724	0.999998	1508	4	0.099133
CLDN12	12	0.51799	0.78356	0.999981	1186	4	0.1821	0.1025	0.3126	0.706584	779	7	0.1821
ATP1B1	12	0.51918	0.78421	0.999981	1187	4	0.027752	0.45635	0.74511	0.999998	1571	4	0.027752
DummyGuide_1970	1	0.51926	0.51813	0.999981	1188	0	0.022193	0.48074	0.47963	0.874232	1618	0	0.022193
AHSG	12	0.51948	0.78436	0.999981	1189	2	0.017223	0.20223	0.47805	0.87339	1108	5	0.017223
DummyGuide_1874	1	0.52003	0.5189	0.999981	1190	0	0.021767	0.47997	0.47901	0.873772	1617	0	0.021767
DummyGuide_1793	1	0.52215	0.52116	0.999981	1191	0	0.022675	0.47785	0.47683	0.873186	1612	0	0.022675
NLGN4X	12	0.52317	0.78661	0.999981	1192	3	0.14008	0.06106	0.21501	0.59361	568	6	0.14008
CD40LG	12	0.52336	0.78673	0.999981	1193	4	0.073899	0.088173	0.28007	0.672633	705	5	0.073899
EFNA5	12	0.52372	0.78694	0.999981	1194	3	0.10167	0.21915	0.50249	0.889764	1156	6	0.10167
EXTL3	12	0.52403	0.7871	0.999981	1195	3	0.04063	0.24514	0.5388	0.915884	1222	5	0.04063
ERAP1	12	0.52496	0.78759	0.999981	1196	4	-0.02504	0.63532	0.85509	0.999998	1811	4	-0.02504
DummyGuide_1112	1	0.52504	0.52402	0.999981	1197	0	0.025238	0.47496	0.47403	0.870113	1607	0	0.025238
RNF130	12	0.52574	0.78807	0.999981	1198	4	-0.019941	0.33602	0.63593	0.976281	1391	4	-0.019941
CDH1	12	0.52576	0.78808	0.999981	1199	4	0.037599	0.79222	0.92621	0.999998	1984	3	0.037599
DummyGuide_1667	1	0.52616	0.52509	0.999981	1200	0	0.026089	0.47384	0.47281	0.869894	1604	0	0.026089
NTM	12	0.52665	0.78855	0.999981	1201	3	0.40857	0.0030535	0.018731	0.232776	68	8	0.40857
BGN	12	0.52735	0.78901	0.999981	1202	3	0.061055	0.40761	0.70247	0.999998	1496	5	0.061055
DummyGuide_1598	1	0.52781	0.5265	0.999981	1203	0	0.025644	0.47219	0.47124	0.869034	1601	0	0.025644
PCDH17	12	0.52907	0.78987	0.999981	1204	3	0.1198	0.16456	0.42044	0.821267	999	6	0.1198
CPVL	12	0.53022	0.79048	0.999981	1205	3	0.18988	0.0074044	0.040354	0.301239	132	6	0.18988
SIDT2	12	0.53154	0.79137	0.999981	1206	1	0.19257	0.097518	0.30138	0.694632	750	7	0.19257
DummyGuide_1123	1	0.53252	0.53123	0.999981	1207	0	0.024926	0.46748	0.46644	0.862249	1594	0	0.024926
CLCA2	12	0.5329	0.79208	0.999981	1208	4	0.059037	0.018573	0.085833	0.409762	254	4	0.059037
PARM1	12	0.53295	0.79209	0.999981	1209	3	0.10762	0.045943	0.17597	0.547769	470	5	0.10762
PANX1	12	0.53306	0.79215	0.999981	1210	3	0.0957	0.45695	0.74571	0.999998	1573	4	0.0957
FCGR1A	1	0.53417	0.53267	0.999981	1211	0	0.049439	0.46583	0.46491	0.86146	1590	0	0.049439
DummyGuide_1748	1	0.53576	0.53435	0.999981	1212	0	0.032692	0.46424	0.46341	0.859353	1585	0	0.032692
DummyGuide_1477	1	0.53594	0.53449	0.999981	1213	0	0.035901	0.46406	0.46325	0.859353	1584	0	0.035901
ST8SIA4	12	0.53613	0.79401	0.999981	1214	2	0.029018	0.50551	0.78165	0.999998	1654	4	0.029018
DummyGuide_1570	1	0.53629	0.53482	0.999981	1215	0	0.032528	0.46371	0.46286	0.859353	1582	0	0.032528
DISP2	12	0.53683	0.79442	0.999981	1216	3	-0.074557	0.68465	0.88265	0.999998	1883	2	-0.074557
DummyGuide_1914	1	0.53723	0.53572	0.999981	1217	0	0.036585	0.46277	0.46185	0.858501	1581	0	0.036585
F11R	12	0.53828	0.7953	0.999981	1218	4	0.033304	0.65364	0.86525	0.999998	1839	3	0.033304
DummyGuide_1205	1	0.53912	0.53756	0.999981	1219	0	0.034997	0.46088	0.45992	0.856959	1579	0	0.034997
TIMP1	12	0.53959	0.7961	0.999981	1220	4	0.23303	0.044152	0.17139	0.544027	458	7	0.23303
DummyGuide_1675	1	0.54012	0.53874	0.999981	1221	0	0.030353	0.45988	0.45895	0.856511	1578	0	0.030353
DummyGuide_1483	1	0.54035	0.53897	0.999981	1222	0	0.041901	0.45965	0.45865	0.856511	1577	0	0.041901
MYL6B	12	0.54079	0.79678	0.999981	1223	4	0.036406	0.013626	0.066817	0.36765	202	4	0.036406
AGRN	12	0.54098	0.79693	0.999981	1224	4	0.016911	0.45949	0.74773	0.999998	1576	4	0.016911
DMTF1	12	0.54132	0.79715	0.999981	1225	2	0.063461	0.21848	0.50157	0.889318	1155	5	0.063461
SIRPA	12	0.54433	0.79888	0.999981	1226	3	0.14442	0.21419	0.49506	0.887851	1140	6	0.14442
APLP2	12	0.54443	0.79894	0.999981	1227	1	0.12245	0.21641	0.49846	0.887958	1149	6	0.12245
SUSD5	12	0.54541	0.79939	0.999981	1228	4	0.063505	0.36682	0.6648	0.993891	1434	5	0.063505
PTPRQ	12	0.54546	0.79943	0.999981	1229	3	0.054005	0.34208	0.64192	0.976614	1404	4	0.054005
SLC6A14	12	0.54649	0.80016	0.999981	1230	2	0.2442	0.021947	0.098564	0.435251	282	8	0.2442
CNTN1	12	0.54922	0.8019	0.999981	1231	2	-0.0066826	0.22328	0.50845	0.892078	1169	4	-0.0066826
SEMA3C	12	0.55108	0.80309	0.999981	1232	4	0.13448	0.1677	0.42544	0.8251	1006	6	0.13448
ENTPD1	12	0.55126	0.80321	0.999981	1233	3	0.066573	0.16217	0.41667	0.819361	984	5	0.066573
DummyGuide_1534	1	0.55149	0.55031	0.999981	1234	0	0.046456	0.44851	0.44749	0.845372	1559	0	0.046456
ULBP3	12	0.55176	0.80356	0.999981	1235	2	0.27588	0.040167	0.16067	0.525491	435	7	0.27588
NTN3	12	0.55267	0.80414	0.999981	1236	4	0.012641	0.33801	0.63794	0.976614	1394	5	0.012641
PKHD1L1	12	0.55515	0.80553	0.999981	1237	4	-0.10611	0.89181	0.96422	0.999998	2111	2	-0.10611
DummyGuide_1893	1	0.55644	0.55548	0.999981	1238	0	0.051322	0.44356	0.44259	0.843076	1553	0	0.051322
DummyGuide_1581	1	0.55673	0.55578	0.999981	1239	0	0.048053	0.44327	0.44232	0.843076	1552	0	0.048053
HLA-C	12	0.55699	0.80658	0.999981	1240	3	0.23327	0.042754	0.16749	0.535606	449	7	0.23327
EFNB2	12	0.55744	0.80685	0.999981	1241	4	0.08915	0.272	0.57453	0.937819	1288	5	0.08915
IMPAD1	12	0.55774	0.80708	0.999981	1242	4	0.019867	0.20011	0.47488	0.870981	1102	5	0.019867
DummyGuide_1696	1	0.55856	0.55769	0.999981	1243	0	0.043868	0.44144	0.44033	0.841362	1548	0	0.043868
CCR7	12	0.55902	0.80784	0.999981	1244	4	0.017196	0.18722	0.45556	0.85422	1067	5	0.017196
DummyGuide_1669	1	0.55915	0.55828	0.999981	1245	0	0.053924	0.44085	0.43967	0.841297	1547	0	0.053924
CTSC	12	0.55948	0.80807	0.999981	1246	4	-0.069875	0.28526	0.58746	0.949012	1308	5	-0.069875
ITGB7	12	0.55955	0.8081	0.999981	1247	4	-0.024635	0.8301	0.9407	0.999998	2023	3	-0.024635
CD48	12	0.55981	0.80832	0.999981	1248	3	0.064179	0.14784	0.39444	0.794304	942	5	0.064179
DummyGuide_1520	1	0.56021	0.55932	0.999981	1249	0	0.054531	0.43979	0.43864	0.840698	1546	0	0.054531
DummyGuide_1724	1	0.56321	0.56253	0.999981	1250	0	0.063881	0.43679	0.43564	0.83769	1541	0	0.063881
IGF2R	12	0.56517	0.81141	0.999981	1251	4	0.1612	0.16574	0.42239	0.824051	1002	6	0.1612
CLEC14A	12	0.56564	0.81167	0.999981	1252	4	0.16688	0.048176	0.182	0.555465	483	6	0.16688
DCN	12	0.56604	0.81198	0.999981	1253	4	0.15966	0.12843	0.363	0.764185	886	6	0.15966
NAV2	12	0.56628	0.81212	0.999981	1254	3	0.097058	0.12359	0.35501	0.754428	873	6	0.097058
CALCRL	12	0.56727	0.81268	0.999981	1255	2	0.13172	0.21546	0.49702	0.887958	1147	6	0.13172
NPTX2	12	0.56744	0.81275	0.999981	1256	4	-0.058262	0.73601	0.9065	0.999998	1939	3	-0.058262
CLEC12A	12	0.56858	0.81337	0.999981	1257	1	0.28014	0.0070629	0.038736	0.29828	124	7	0.28014
PRSS35	12	0.56919	0.81375	0.999981	1258	4	0.071508	0.21516	0.49662	0.887958	1145	5	0.071508
SERPINA3	12	0.56928	0.81381	0.999981	1259	3	0.12147	0.12345	0.35479	0.754428	872	6	0.12147
DSC2	12	0.5698	0.81413	0.999981	1260	3	0.12321	0.1197	0.34846	0.749609	851	5	0.12321
DummyGuide_1725	1	0.57022	0.56938	0.999981	1261	0	0.062965	0.42978	0.42868	0.826969	1532	0	0.062965
TNFRSF13B	12	0.57062	0.81454	0.999981	1262	3	0.22296	0.06096	0.2147	0.59347	567	7	0.22296
LTBR	12	0.5707	0.8146	0.999981	1263	4	0.16614	0.17481	0.43651	0.838675	1025	6	0.16614
DummyGuide_1198	1	0.57099	0.57014	0.999981	1264	0	0.060505	0.42901	0.42795	0.826969	1531	0	0.060505
CYTH1	12	0.57119	0.81485	0.999981	1265	3	0.17649	0.11129	0.33173	0.731495	809	7	0.17649
TGFB1	12	0.57138	0.81493	0.999981	1266	3	0.19566	0.072919	0.24443	0.63535	626	7	0.19566
HFE	12	0.57183	0.8152	0.999981	1267	2	0.22134	0.023743	0.10506	0.446127	296	7	0.22134
CD200R1	12	0.57184	0.8152	0.999981	1268	3	-0.022828	0.27645	0.57874	0.941642	1295	4	-0.022828
CHST11	12	0.57273	0.81572	0.999981	1269	2	0.17386	0.057571	0.20612	0.581841	540	6	0.17386
DummyGuide_1843	1	0.57411	0.5733	0.999981	1270	0	0.073915	0.42589	0.42499	0.8251	1530	0	0.073915
DummyGuide_1263	1	0.57458	0.57377	0.999981	1271	0	0.062755	0.42542	0.42452	0.8251	1529	0	0.062755
DAG1	12	0.57459	0.81681	0.999981	1272	4	-0.073739	0.45115	0.74065	0.999998	1562	3	-0.073739
DummyGuide_1610	1	0.57664	0.57586	0.999981	1273	0	0.070299	0.42336	0.42257	0.824051	1524	0	0.070299
SCN7A	12	0.57785	0.81873	0.999981	1274	3	0.033569	0.26581	0.56672	0.931898	1273	3	0.033569
CLDND1	12	0.57944	0.81971	0.999981	1275	4	0.018234	0.39825	0.69415	0.999998	1489	4	0.018234
CEACAM8	12	0.57989	0.82	0.999981	1276	4	0.13374	0.028876	0.1229	0.463082	347	6	0.13374
ATP1B2	12	0.58085	0.82056	0.999981	1277	2	0.33696	0.011576	0.058834	0.354514	179	8	0.33696
EMILIN1	12	0.58121	0.82075	0.999981	1278	2	0.13998	0.15379	0.40346	0.801456	968	5	0.13998
CDH5	12	0.58135	0.82083	0.999981	1279	4	-0.0071997	0.56727	0.81675	0.999998	1722	4	-0.0071997
DummyGuide_1452	1	0.58171	0.58117	0.999981	1280	0	0.079744	0.41829	0.4177	0.820103	1517	0	0.079744
GP5	12	0.58275	0.82166	0.999981	1281	3	0.14508	0.22298	0.5081	0.892078	1167	6	0.14508
MRC1	12	0.58343	0.82202	0.999981	1282	3	0.14392	0.059841	0.21182	0.590369	555	6	0.14392
MS4A1	12	0.58426	0.82252	0.999981	1283	3	0.14343	0.17005	0.42915	0.826969	1016	6	0.14343
CANX	12	0.58434	0.82257	0.999981	1284	2	0.23105	0.062303	0.21812	0.599393	577	7	0.23105
DummyGuide_1136	1	0.58642	0.58583	0.999981	1285	0	0.083597	0.41358	0.41284	0.8132	1510	0	0.083597
SLC15A4	12	0.58655	0.82393	0.999981	1286	3	0.030393	0.024256	0.10677	0.447604	303	5	0.030393
CNTFR	12	0.58686	0.82415	0.999981	1287	2	-0.0027741	0.28629	0.58827	0.949013	1311	5	-0.0027741
DummyGuide_1766	1	0.58766	0.58708	0.999981	1288	0	0.081599	0.41234	0.41152	0.811269	1506	0	0.081599
DummyGuide_1054	1	0.58866	0.58801	0.999981	1289	0	0.075521	0.41134	0.41065	0.810235	1504	0	0.075521
DummyGuide_1155	1	0.58972	0.58912	0.999981	1290	0	0.080059	0.41028	0.40969	0.809016	1502	0	0.080059
EPHA4	12	0.59003	0.82599	0.999981	1291	4	0.028133	0.43595	0.72738	0.999998	1539	5	0.028133
DummyGuide_1107	1	0.5909	0.59031	0.999981	1292	0	0.073079	0.4091	0.40852	0.808075	1500	0	0.073079
NPR3	12	0.59252	0.82751	0.999981	1293	4	0.036624	0.048715	0.18349	0.55569	486	4	0.036624
DummyGuide_1895	1	0.59278	0.59225	0.999981	1294	0	0.098989	0.40722	0.40652	0.805474	1495	0	0.098989
KLRG1	12	0.59286	0.82772	0.999981	1295	4	0.1339	0.26773	0.56923	0.933058	1278	6	0.1339
ITPR3	12	0.59341	0.82811	0.999981	1296	4	0.039491	0.13377	0.37184	0.774313	903	6	0.039491
ADORA1	12	0.59525	0.82923	0.999981	1297	4	0.1049	0.34939	0.64849	0.981947	1414	5	0.1049
LAMC2	12	0.59547	0.82937	0.999981	1298	3	0.16883	0.18118	0.44618	0.844795	1046	6	0.16883
ADAM12	12	0.59589	0.82968	0.999981	1299	2	0.25883	0.015593	0.074581	0.388384	224	8	0.25883
CHGA	12	0.59742	0.83063	0.999981	1300	2	0.087333	0.19416	0.46589	0.861921	1089	5	0.087333
VAMP5	12	0.59787	0.83084	0.999981	1301	3	0.1642	0.072438	0.24335	0.63535	624	6	0.1642
DummyGuide_1613	1	0.59826	0.59771	0.999981	1302	0	0.12251	0.40174	0.40094	0.798477	1492	0	0.12251
CD80	12	0.59834	0.83107	0.999981	1303	2	0.32942	0.014572	0.070411	0.378588	210	7	0.32942
GFRA2	12	0.59987	0.83197	0.999981	1304	2	0.071395	0.034008	0.14075	0.496114	381	5	0.071395
PEAR1	12	0.60029	0.83223	0.999981	1305	3	0.052658	0.26568	0.56658	0.931898	1272	5	0.052658
RAMP3	12	0.60084	0.83256	0.999981	1306	3	0.016527	0.14664	0.39255	0.791862	938	5	0.016527
DummyGuide_1636	1	0.60386	0.60346	0.999981	1307	0	0.097114	0.39614	0.39552	0.795789	1486	0	0.097114
MXRA8	12	0.60562	0.83536	0.999981	1308	4	0.087043	0.5829	0.82529	0.999998	1734	4	0.087043
TMPRSS5	12	0.60624	0.83577	0.999981	1309	3	0.18373	0.02828	0.12093	0.462399	340	7	0.18373
DummyGuide_1954	1	0.60751	0.60701	0.999981	1310	0	0.098801	0.39249	0.39195	0.791862	1482	0	0.098801
SLC19A1	12	0.60804	0.83689	0.999981	1311	2	0.26991	0.044683	0.17281	0.544734	462	7	0.26991
NAGA	12	0.60855	0.83721	0.999981	1312	4	-0.0090374	0.5216	0.79113	0.999998	1665	4	-0.0090374
DummyGuide_1711	1	0.60904	0.60856	0.999981	1313	0	0.092774	0.39096	0.39041	0.790937	1477	0	0.092774
DummyGuide_1130	1	0.60963	0.60913	0.999981	1314	0	0.086807	0.39037	0.38979	0.790362	1476	0	0.086807
NPY1R	12	0.61162	0.8389	0.999981	1315	3	0.25893	0.039652	0.15919	0.523997	432	7	0.25893
DummyGuide_1170	1	0.61305	0.6125	0.999981	1316	0	0.099101	0.38695	0.38639	0.785514	1472	0	0.099101
UST	12	0.6134	0.84	0.999981	1317	2	0.3747	0.001423	0.0097468	0.198824	36	9	0.3747
LRPAP1	12	0.61428	0.84052	0.999981	1318	2	0.060566	0.49762	0.77721	0.999998	1639	4	0.060566
DummyGuide_1411	1	0.61464	0.61418	0.999981	1319	0	0.091678	0.38536	0.38476	0.784249	1471	0	0.091678
FLRT1	12	0.61484	0.84081	0.999981	1320	4	-0.020266	0.10035	0.30787	0.700851	769	5	-0.020266
CD83	12	0.61576	0.84141	0.999981	1321	3	-0.04809	0.53453	0.79825	0.999998	1681	4	-0.04809
P4HA2	12	0.61685	0.84199	0.999981	1322	4	-0.016241	0.22955	0.51716	0.900399	1177	5	-0.016241
DummyGuide_1710	1	0.61711	0.6166	0.999981	1323	0	0.10241	0.38289	0.38223	0.780432	1468	0	0.10241
TNFRSF25	12	0.61781	0.84252	0.999981	1324	2	-0.030937	0.043636	0.16986	0.540235	456	3	-0.030937
DummyGuide_1216	1	0.61782	0.61735	0.999981	1325	0	0.11191	0.38218	0.38152	0.779679	1465	0	0.11191
ROR2	12	0.61851	0.84289	0.999981	1326	4	-0.054396	0.55055	0.80736	0.999998	1703	4	-0.054396
COL6A2	12	0.61985	0.84368	0.999981	1327	2	0.11461	0.22205	0.50664	0.891561	1166	6	0.11461
DummyGuide_1639	1	0.62035	0.61975	0.999981	1328	0	0.10001	0.37965	0.37887	0.777163	1462	0	0.10001
DummyGuide_1885	1	0.62059	0.62001	0.999981	1329	0	0.1093	0.37941	0.37859	0.777163	1460	0	0.1093
SLC38A9	12	0.62083	0.84428	0.999981	1330	3	0.1865	0.11611	0.34195	0.744925	833	7	0.1865
DummyGuide_1500	1	0.62112	0.62066	0.999981	1331	0	0.10572	0.37888	0.37802	0.777163	1457	0	0.10572
LRP5	12	0.62117	0.84453	0.999981	1332	4	0.17645	0.1243	0.35617	0.75622	874	6	0.17645
DummyGuide_1788	1	0.62124	0.62079	0.999981	1333	0	0.10205	0.37876	0.37793	0.777163	1456	0	0.10205
DummyGuide_1578	1	0.6213	0.62087	0.999981	1334	0	0.10023	0.3787	0.37786	0.777163	1455	0	0.10023
DummyGuide_1814	1	0.62147	0.62107	0.999981	1335	0	0.10246	0.37853	0.37766	0.777163	1454	0	0.10246
SGCB	12	0.62166	0.84478	0.999981	1336	2	-0.001656	0.30949	0.61096	0.959206	1356	4	-0.001656
PLOD3	12	0.62218	0.8451	0.999981	1337	3	0.020768	0.68438	0.88249	0.999998	1882	4	0.020768
PXDN	12	0.62248	0.84527	0.999981	1338	4	0.017031	0.48665	0.7703	0.999998	1628	4	0.017031
DummyGuide_1802	1	0.62312	0.6227	0.999981	1339	0	0.13741	0.37688	0.37613	0.777163	1453	0	0.13741
PLA2R1	12	0.62465	0.84658	0.999981	1340	4	-0.069504	0.95811	0.98254	0.999998	2200	2	-0.069504
CLEC1B	12	0.62481	0.84671	0.999981	1341	4	0.24125	0.022501	0.10052	0.435251	288	8	0.24125
TUBB6	12	0.62499	0.84679	0.999981	1342	3	0.32701	0.0065222	0.036168	0.297525	116	8	0.32701
PA2G4	3	0.62579	0.64133	0.999981	1343	1	0.12344	0.69906	0.70421	0.999998	1900	1	0.12344
DummyGuide_1635	1	0.62583	0.62562	0.999981	1344	0	0.17644	0.37417	0.37346	0.776736	1451	1	0.17644
CLEC1A	12	0.62838	0.84879	0.999981	1345	3	-0.025033	0.29682	0.59878	0.953933	1331	5	-0.025033
DummyGuide_1125	1	0.62937	0.6295	0.999981	1346	0	0.10796	0.37063	0.36981	0.771894	1442	1	0.10796
THSD7A	12	0.62943	0.84938	0.999981	1347	4	0.16404	0.017811	0.082914	0.406054	246	6	0.16404
POMT2	12	0.62952	0.84943	0.999981	1348	3	0.17018	0.051827	0.19171	0.565946	500	6	0.17018
DummyGuide_1851	1	0.63013	0.63038	0.999981	1349	0	0.12487	0.36987	0.36913	0.771152	1439	1	0.12487
TGFBR2	12	0.63134	0.85057	0.999981	1350	2	0.07328	0.28542	0.58758	0.949012	1309	5	0.07328
DummyGuide_1861	1	0.63143	0.63165	0.999981	1351	0	0.10215	0.36857	0.36785	0.769859	1438	1	0.10215
DummyGuide_1338	1	0.63178	0.63198	0.999981	1352	0	0.10619	0.36822	0.36755	0.769859	1436	1	0.10619
CLCN2	12	0.63247	0.85121	0.999981	1353	2	0.28947	0.0072632	0.039703	0.299242	128	9	0.28947
DummyGuide_1408	1	0.63337	0.6336	0.999981	1354	0	0.12417	0.36663	0.36588	0.769165	1433	1	0.12417
CD7	12	0.63341	0.85188	0.999981	1355	2	0.13999	0.20482	0.48174	0.874456	1116	6	0.13999
ELFN1	12	0.6336	0.85197	0.999981	1356	2	0.15859	0.090275	0.28484	0.676249	716	7	0.15859
ACE	12	0.63451	0.85262	0.999981	1357	4	0.058649	0.71915	0.90098	0.999998	1927	3	0.058649
ZC3HAV1	12	0.63613	0.85364	0.999981	1358	3	0.025261	0.41996	0.71372	0.999998	1519	5	0.025261
DummyGuide_1292	1	0.63714	0.63735	0.999981	1359	0	0.11801	0.36286	0.36205	0.763173	1430	1	0.11801
GAPDHS	12	0.63744	0.85438	0.999981	1360	4	-0.010492	0.47624	0.76188	0.999998	1609	4	-0.010492
PCDHA11	12	0.6399	0.85567	0.999981	1361	2	0.30157	0.00048703	0.0036981	0.176904	14	10	0.30157
DummyGuide_1948	1	0.64044	0.64071	0.999981	1362	0	0.12132	0.35956	0.35886	0.759182	1425	1	0.12132
DummyGuide_1491	1	0.64186	0.64214	0.999981	1363	0	0.12144	0.35814	0.3575	0.757274	1423	1	0.12144
APOB	12	0.64228	0.85707	0.999981	1364	3	0.071457	0.83822	0.94385	0.999998	2036	3	0.071457
HLA-DPB1	12	0.64352	0.85779	0.999981	1365	3	0.18183	0.089301	0.28257	0.674672	709	6	0.18183
P2RX7	12	0.64416	0.85812	0.999981	1366	3	0.10492	0.29746	0.59946	0.953933	1332	5	0.10492
EFNA1	12	0.64602	0.85927	0.999981	1367	4	-0.045493	0.76363	0.91599	0.999998	1961	3	-0.045493
DummyGuide_1131	1	0.64622	0.64662	0.999981	1368	0	0.14144	0.35378	0.35331	0.753552	1419	1	0.14144
EPHA2	12	0.64779	0.86039	0.999981	1369	4	0.14214	0.045333	0.17437	0.546328	467	6	0.14214
DummyGuide_1972	1	0.64839	0.6488	0.999981	1370	0	0.11564	0.35161	0.35115	0.751675	1416	1	0.11564
QSOX2	12	0.64852	0.86077	0.999981	1371	3	0.048224	0.23319	0.52225	0.902761	1192	5	0.048224
FRAS1	12	0.64961	0.86138	0.999981	1372	2	0.087543	0.2435	0.53653	0.913974	1218	5	0.087543
PTGIR	12	0.65015	0.86173	0.999981	1373	2	0.13981	0.25677	0.55455	0.923864	1254	6	0.13981
DummyGuide_1457	1	0.65105	0.65152	0.999981	1374	0	0.14742	0.34895	0.34849	0.749609	1413	1	0.14742
DummyGuide_1183	1	0.65116	0.65164	0.999981	1375	0	0.13743	0.34884	0.3484	0.749609	1412	1	0.13743
CD74	12	0.65147	0.86255	0.999981	1376	2	0.1956	0.037311	0.152	0.511179	410	8	0.1956
TCTN2	12	0.65162	0.86263	0.999981	1377	3	0.18845	0.083677	0.26967	0.660354	684	6	0.18845
AKAP11	12	0.65337	0.8637	0.999981	1378	2	0.025646	0.50039	0.77864	0.999998	1646	4	0.025646
DummyGuide_1539	1	0.65405	0.65442	0.999981	1379	0	0.12883	0.34595	0.34563	0.74821	1409	1	0.12883
DummyGuide_1417	1	0.65464	0.6551	0.999981	1380	0	0.13128	0.34536	0.3451	0.74821	1408	1	0.13128
DummyGuide_1641	1	0.65499	0.65547	0.999981	1381	0	0.13095	0.34501	0.34481	0.74821	1407	1	0.13095
SLC12A5	12	0.65696	0.86571	0.999981	1382	2	0.10668	0.16798	0.42593	0.8251	1011	6	0.10668
ANGPTL2	12	0.6571	0.86581	0.999981	1383	2	0.21913	0.098887	0.30456	0.697836	756	7	0.21913
KIAA1324L	12	0.65815	0.86645	0.999981	1384	4	-0.012503	0.23267	0.52153	0.902682	1188	3	-0.012503
ADCY3	12	0.65895	0.86692	0.999981	1385	2	0.11607	0.32471	0.62545	0.970897	1371	5	0.11607
OPCML	12	0.65948	0.8672	0.999981	1386	2	0.27771	0.0008371	0.0059495	0.192735	22	9	0.27771
ITGA4	12	0.66008	0.86758	0.999981	1387	3	0.15332	0.18514	0.45241	0.850409	1061	6	0.15332
DummyGuide_1523	1	0.66035	0.66055	0.999981	1388	0	0.13368	0.33965	0.33928	0.741002	1398	1	0.13368
DummyGuide_1016	1	0.66094	0.66109	0.999981	1389	0	0.13946	0.33906	0.33877	0.741002	1396	1	0.13946
TAGLN2	12	0.66115	0.86817	0.999981	1390	4	-0.062654	0.07197	0.24224	0.63535	620	5	-0.062654
MSR1	12	0.66355	0.86955	0.999981	1391	4	0.0091196	0.36074	0.65922	0.988715	1427	4	0.0091196
GOLIM4	12	0.66403	0.86983	0.999981	1392	3	0.12241	0.18357	0.45002	0.846578	1058	6	0.12241
DummyGuide_1566	1	0.66554	0.66581	0.999981	1393	0	0.15814	0.33446	0.33396	0.735711	1390	1	0.15814
FGFR4	12	0.66621	0.87103	0.999981	1394	4	-0.00056865	0.411	0.7056	0.999998	1503	4	-0.00056865
IL10RB	12	0.66626	0.87106	0.999981	1395	1	0.34192	0.010927	0.056134	0.347509	171	8	0.34192
SLC22A5	12	0.66755	0.87184	0.999981	1396	3	-0.049049	0.23928	0.53058	0.909122	1207	2	-0.049049
F5	12	0.66805	0.87213	0.999981	1397	3	0.052268	0.4823	0.76677	0.999998	1621	5	0.052268
DummyGuide_1302	1	0.66837	0.66873	0.999981	1398	0	0.14215	0.33163	0.331	0.730562	1387	1	0.14215
DummyGuide_1522	1	0.66884	0.66922	0.999981	1399	0	0.13624	0.33116	0.33053	0.730214	1386	1	0.13624
DummyGuide_1920	1	0.67096	0.6712	0.999981	1400	0	0.14756	0.32904	0.32844	0.726965	1379	1	0.14756
DummyGuide_1955	1	0.67108	0.67129	0.999981	1401	0	0.16782	0.32892	0.32833	0.726965	1378	1	0.16782
SLC15A2	12	0.67132	0.87412	0.999981	1402	4	-0.023569	0.11851	0.34641	0.749064	845	4	-0.023569
DummyGuide_1090	1	0.67143	0.67162	0.999981	1403	0	0.14531	0.32857	0.32801	0.726965	1376	1	0.14531
DummyGuide_1127	1	0.67208	0.67228	0.999981	1404	0	0.14448	0.32792	0.32741	0.726965	1375	1	0.14448
DummyGuide_1898	1	0.67296	0.67309	0.999981	1405	0	0.15278	0.32704	0.32647	0.726726	1374	1	0.15278
HLA-B	12	0.67343	0.87527	0.999981	1406	2	0.21384	0.063989	0.22258	0.606672	590	7	0.21384
FCER2	12	0.67353	0.87534	0.999981	1407	4	-0.053376	0.17554	0.4376	0.840072	1028	3	-0.053376
DummyGuide_1050	1	0.67378	0.67383	0.999981	1408	0	0.1782	0.32622	0.32572	0.725742	1372	1	0.1782
SLC46A1	12	0.67741	0.87786	0.999981	1409	3	0.10358	0.077785	0.25604	0.646021	653	5	0.10358
GGT5	12	0.67749	0.87792	0.999981	1410	3	0.022727	0.37273	0.67059	0.994846	1449	5	0.022727
HEPACAM2	12	0.67846	0.87846	0.999981	1411	3	-0.0024742	0.24666	0.54082	0.915884	1226	5	-0.0024742
DummyGuide_1737	1	0.68097	0.68091	0.999981	1412	0	0.15177	0.31903	0.31851	0.716496	1368	1	0.15177
DummyGuide_1298	1	0.68203	0.68195	0.999981	1413	0	0.15714	0.31797	0.31731	0.714474	1367	1	0.15714
EPDR1	12	0.68225	0.88081	0.999981	1414	4	0.13621	0.055216	0.20033	0.579129	523	6	0.13621
FAM171A1	12	0.68293	0.88118	0.999981	1415	3	0.021281	0.13889	0.37996	0.777163	924	5	0.021281
DummyGuide_1965	1	0.68303	0.68296	0.999981	1416	0	0.18171	0.31697	0.31632	0.713619	1363	1	0.18171
CADM1	12	0.68355	0.88153	0.999981	1417	2	0.11664	0.52576	0.79346	0.999998	1671	4	0.11664
CLU	12	0.68373	0.88161	0.999981	1418	2	0.0033008	0.30789	0.60942	0.959197	1353	5	0.0033008
MR1	12	0.68645	0.88302	0.999981	1419	3	0.23529	0.027372	0.11776	0.46033	330	7	0.23529
DPEP1	12	0.68651	0.88307	0.999981	1420	4	-0.013458	0.65988	0.86865	0.999998	1847	3	-0.013458
DummyGuide_1301	1	0.68686	0.68672	0.999981	1421	0	0.15113	0.31314	0.31253	0.706584	1361	1	0.15113
ITGAX	12	0.68694	0.88331	0.999981	1422	3	0.036778	0.67846	0.87918	0.999998	1871	3	0.036778
BTN3A3	12	0.68787	0.88372	0.999981	1423	4	-0.045576	0.85216	0.94942	0.999998	2053	3	-0.045576
ELOVL4	12	0.68823	0.8839	0.999981	1424	3	0.0095162	0.59787	0.8339	0.999998	1753	3	0.0095162
SLC7A2	12	0.68869	0.88415	0.999981	1425	2	0.15039	0.10562	0.31937	0.717746	786	7	0.15039
DummyGuide_1448	1	0.6891	0.68892	0.999981	1426	0	0.16798	0.3109	0.31025	0.702631	1358	1	0.16798
IFI30	12	0.69028	0.88501	0.999981	1427	4	0.042918	0.23265	0.52151	0.902682	1186	4	0.042918
F2RL3	12	0.69128	0.88559	0.999981	1428	3	0.088035	0.18226	0.44787	0.845372	1050	6	0.088035
SIRPB1	12	0.6917	0.88588	0.999981	1429	2	0.14146	0.19114	0.46128	0.858121	1083	6	0.14146
HSD17B2	12	0.69208	0.8861	0.999981	1430	3	0.17691	0.1069	0.32209	0.720906	794	6	0.17691
THY1	12	0.69335	0.8868	0.999981	1431	3	0.090316	0.33066	0.63099	0.972388	1385	5	0.090316
RELL1	12	0.69362	0.88691	0.999981	1432	2	0.29337	0.0045702	0.026381	0.268984	89	9	0.29337
SLITRK2	12	0.69528	0.88759	0.999981	1433	2	0.10562	0.44822	0.73808	0.999998	1558	4	0.10562
DummyGuide_1223	1	0.69576	0.69567	0.999981	1434	0	0.17081	0.30424	0.30368	0.697114	1348	1	0.17081
ALPP	12	0.696	0.88786	0.999981	1435	3	0.4043	0.0010873	0.0076517	0.197098	28	8	0.4043
DummyGuide_1177	1	0.697	0.69688	0.999981	1436	0	0.16263	0.303	0.30251	0.695171	1345	1	0.16263
DummyGuide_1595	1	0.69876	0.69871	0.999981	1437	0	0.16605	0.30124	0.30088	0.694632	1344	1	0.16605
DummyGuide_1969	1	0.69888	0.69882	0.999981	1438	0	0.18215	0.30112	0.30074	0.694632	1342	1	0.18215
DummyGuide_1653	1	0.69976	0.69964	0.999981	1439	0	0.20495	0.30024	0.29983	0.694632	1339	1	0.20495
DummyGuide_1215	1	0.69988	0.69978	0.999981	1440	0	0.17406	0.30012	0.29973	0.694632	1338	1	0.17406
WDR13	12	0.70001	0.88937	0.999981	1441	1	0.14475	0.17064	0.43011	0.827737	1018	6	0.14475
PCDH1	12	0.70022	0.88942	0.999981	1442	2	0.085077	0.075721	0.25124	0.642105	642	5	0.085077
DummyGuide_1658	1	0.70071	0.70055	0.999981	1443	0	0.16553	0.29929	0.29891	0.694632	1337	1	0.16553
LGALS3BP	12	0.70079	0.88962	0.999981	1444	3	0.13118	0.23708	0.5276	0.906325	1203	6	0.13118
DummyGuide_1923	1	0.70147	0.70132	0.999981	1445	0	0.16366	0.29853	0.29818	0.694451	1336	1	0.16366
DummyGuide_1858	1	0.70194	0.70182	0.999981	1446	0	0.17259	0.29806	0.29778	0.694451	1334	1	0.17259
GUSB	12	0.70283	0.8903	0.999981	1447	3	0.27509	0.015295	0.07336	0.386128	218	8	0.27509
SLIT2	12	0.7034	0.8905	0.999981	1448	3	0.1877	0.030426	0.12849	0.471676	364	8	0.1877
CDH2	12	0.70533	0.89117	0.999981	1449	3	0.15767	0.10602	0.32025	0.718343	788	7	0.15767
DummyGuide_1983	1	0.70695	0.70661	0.999981	1450	0	0.20512	0.29305	0.29242	0.684746	1326	1	0.20512
DummyGuide_1332	1	0.70748	0.70712	0.999981	1451	0	0.18674	0.29252	0.29193	0.684292	1323	1	0.18674
DummyGuide_1351	1	0.70766	0.70729	0.999981	1452	0	0.17878	0.29234	0.29175	0.684292	1322	1	0.17878
DummyGuide_1864	1	0.70819	0.70779	0.999981	1453	0	0.16822	0.29181	0.29122	0.683997	1320	1	0.16822
DummyGuide_1722	1	0.70937	0.70904	0.999981	1454	0	0.15124	0.29063	0.28998	0.682746	1316	1	0.15124
AMBP	12	0.71013	0.89281	0.999981	1455	3	0.17252	0.13721	0.37725	0.777163	914	6	0.17252
DummyGuide_1200	1	0.71149	0.71121	0.999981	1456	0	0.17846	0.28851	0.28795	0.679713	1313	1	0.17846
GREM1	12	0.71152	0.89326	0.999981	1457	2	0.089561	0.41447	0.70867	0.999998	1512	4	0.089561
DYNC2H1	12	0.71196	0.8934	0.999981	1458	2	0.17693	0.099055	0.30499	0.697991	757	6	0.17693
DummyGuide_1712	1	0.71432	0.71406	0.999981	1459	0	0.20919	0.28568	0.28504	0.676249	1310	1	0.20919
ACTN1	12	0.71454	0.89442	0.999981	1460	3	-0.031384	0.63585	0.85538	0.999998	1812	2	-0.031384
DummyGuide_1004	1	0.71479	0.71454	0.999981	1461	0	0.16615	0.28521	0.28455	0.676249	1307	1	0.16615
DummyGuide_1164	1	0.71638	0.71619	0.999981	1462	0	0.19457	0.28362	0.28292	0.674672	1305	1	0.19457
DummyGuide_1526	1	0.71814	0.71795	0.999981	1463	0	0.20268	0.28186	0.28126	0.673424	1302	1	0.20268
CADM3	12	0.71897	0.89608	0.999981	1464	3	0.17841	0.16741	0.42506	0.8251	1005	6	0.17841
TMC7	12	0.71913	0.89611	0.999981	1465	3	-0.055751	0.93346	0.97449	0.999998	2160	2	-0.055751
DummyGuide_1762	1	0.72009	0.71989	0.999981	1466	0	0.17737	0.27991	0.27943	0.671769	1300	1	0.17737
KNG1	12	0.72078	0.89669	0.999981	1467	3	0.092601	0.28929	0.59146	0.952178	1314	5	0.092601
DummyGuide_1699	1	0.72144	0.72125	0.999981	1468	0	0.18507	0.27856	0.27815	0.670756	1298	1	0.18507
LILRA1	12	0.72154	0.89697	0.999981	1469	1	0.64292	3.8129e-06	4.4352e-05	0.05198	1	10	0.64292
GZMH	12	0.72202	0.89717	0.999981	1470	3	0.21188	0.026687	0.11531	0.459589	321	8	0.21188
DummyGuide_1743	1	0.72221	0.72217	0.999981	1471	0	0.16921	0.27779	0.27735	0.66953	1297	1	0.16921
TMED9	12	0.72336	0.89768	0.999981	1472	2	0.17637	0.072987	0.24458	0.63535	627	7	0.17637
C4BPA	12	0.72372	0.89779	0.999981	1473	2	0.18649	0.031769	0.13295	0.479429	372	8	0.18649
LMF2	12	0.72459	0.89807	0.999981	1474	2	-0.030691	0.46668	0.75384	0.999998	1593	5	-0.030691
DummyGuide_1006	1	0.72627	0.72627	0.999981	1475	0	0.1843	0.27373	0.27328	0.664501	1293	1	0.1843
HS6ST1	12	0.72654	0.89874	0.999981	1476	3	0.14609	0.016487	0.077947	0.396329	233	6	0.14609
DummyGuide_1047	1	0.72657	0.72654	0.999981	1477	0	0.2131	0.27343	0.27303	0.664501	1292	1	0.2131
SLC2A5	12	0.72718	0.89901	0.999981	1478	2	0.12907	0.71113	0.89704	0.999998	1914	4	0.12907
DummyGuide_1271	1	0.72757	0.72753	0.999981	1479	0	0.18513	0.27243	0.27209	0.66298	1289	1	0.18513
DummyGuide_1345	1	0.7291	0.729	0.999981	1480	0	0.23572	0.2709	0.27053	0.660556	1287	1	0.23572
THSD1	12	0.72969	0.89986	0.999981	1481	2	0.082067	0.30558	0.6073	0.957941	1351	4	0.082067
DummyGuide_1924	1	0.72969	0.72957	0.999981	1482	0	0.22989	0.27031	0.26989	0.660354	1286	1	0.22989
CD28	12	0.72972	0.89989	0.999981	1483	3	0.27647	0.02493	0.10902	0.450705	307	8	0.27647
DummyGuide_1499	1	0.72981	0.72968	0.999981	1484	0	0.19696	0.27019	0.2698	0.660354	1285	1	0.19696
DummyGuide_1827	1	0.73187	0.73177	0.999981	1485	0	0.2068	0.26813	0.26783	0.659268	1280	1	0.2068
DummyGuide_1960	1	0.73222	0.7321	0.999981	1486	0	0.22487	0.26778	0.26742	0.659268	1279	1	0.22487
DummyGuide_1218	1	0.73246	0.73233	0.999981	1487	0	0.20284	0.26754	0.26719	0.659268	1277	1	0.20284
NRP2	12	0.7331	0.90107	0.999981	1488	3	0.15992	0.068442	0.23345	0.624107	605	6	0.15992
DummyGuide_1479	1	0.7334	0.73333	0.999981	1489	0	0.21765	0.2666	0.26623	0.659268	1275	1	0.21765
THBS2	12	0.7344	0.90157	0.999981	1490	2	0.25802	0.0013864	0.0095525	0.198824	35	7	0.25802
DummyGuide_1347	1	0.73446	0.73436	0.999981	1491	0	0.19201	0.26554	0.26521	0.658531	1271	1	0.19201
DummyGuide_1911	1	0.73452	0.73446	0.999981	1492	0	0.19669	0.26548	0.26518	0.658531	1270	1	0.19669
CLDN1	12	0.73558	0.902	0.999981	1493	3	-0.010921	0.52211	0.79142	0.999998	1668	3	-0.010921
DummyGuide_1003	1	0.73623	0.73634	0.999981	1494	0	0.19844	0.26377	0.26332	0.656631	1269	1	0.19844
MYH11	12	0.73732	0.90264	0.999981	1495	3	0.079204	0.29256	0.59461	0.952678	1324	5	0.079204
DummyGuide_1246	1	0.73847	0.73858	0.999981	1496	0	0.24545	0.26153	0.26095	0.652088	1264	1	0.24545
DummyGuide_1757	1	0.73853	0.73864	0.999981	1497	0	0.24341	0.26147	0.2609	0.652088	1263	1	0.24341
SLC8A1	12	0.73959	0.90346	0.999981	1498	3	0.021689	0.65752	0.86737	0.999998	1843	4	0.021689
PPM1L	12	0.74121	0.90402	0.999981	1499	3	0.081541	0.15056	0.39847	0.796853	954	5	0.081541
DummyGuide_1666	1	0.74135	0.74141	0.999981	1500	0	0.21116	0.25865	0.25824	0.647392	1261	1	0.21116
ACTN4	12	0.74144	0.9041	0.999981	1501	2	0.38263	0.00043714	0.0033602	0.176904	12	9	0.38263
CLEC2D	12	0.74153	0.90417	0.999981	1502	2	0.19469	0.029143	0.1238	0.465053	350	7	0.19469
DummyGuide_1515	1	0.74165	0.74171	0.999981	1503	0	0.19097	0.25835	0.25796	0.647392	1260	1	0.19097
DummyGuide_1314	1	0.74194	0.74199	0.999981	1504	0	0.23894	0.25806	0.25761	0.647392	1258	1	0.23894
SIGLEC9	12	0.74226	0.90446	0.999981	1505	1	0.23783	0.038657	0.15638	0.519192	424	8	0.23783
DummyGuide_1108	1	0.74477	0.74481	0.999981	1506	0	0.22184	0.25523	0.25462	0.643132	1252	1	0.22184
DummyGuide_1167	1	0.74495	0.74494	0.999981	1507	0	0.20992	0.25505	0.2545	0.643132	1250	1	0.20992
SLC6A8	12	0.74597	0.90583	0.999981	1508	2	0.19301	0.022197	0.099422	0.435251	284	7	0.19301
DummyGuide_1838	1	0.74636	0.74634	0.999981	1509	0	0.25188	0.25364	0.25313	0.642145	1247	1	0.25188
CREG1	12	0.74651	0.90597	0.999981	1510	2	0.048822	0.63304	0.8536	0.999998	1805	4	0.048822
DummyGuide_1784	1	0.74801	0.74791	0.999981	1511	0	0.22914	0.25199	0.25156	0.642105	1245	1	0.22914
OGFOD1	12	0.74817	0.90656	0.999981	1512	3	0.075755	0.37121	0.66919	0.994811	1445	5	0.075755
KIRREL	12	0.74931	0.90701	0.999981	1513	2	0.19028	0.10433	0.31669	0.71378	783	7	0.19028
DummyGuide_1018	1	0.74972	0.74963	0.999981	1514	0	0.19209	0.25028	0.24981	0.639945	1242	1	0.19209
SIGLEC12	12	0.7502	0.90733	0.999981	1515	2	0.12709	0.15018	0.39793	0.796853	951	6	0.12709
DummyGuide_1208	1	0.75025	0.75014	0.999981	1516	0	0.25489	0.24975	0.24928	0.639291	1239	1	0.25489
MOXD1	12	0.7505	0.90746	0.999981	1517	3	0.22471	0.046581	0.17763	0.550504	474	7	0.22471
DummyGuide_1995	1	0.75131	0.75117	0.999981	1518	0	0.20387	0.24869	0.24828	0.637432	1236	1	0.20387
DBH	12	0.75168	0.90791	0.999981	1519	3	0.16529	0.11351	0.33627	0.738728	821	6	0.16529
DummyGuide_1671	1	0.75202	0.75192	0.999981	1520	0	0.23539	0.24798	0.24758	0.636318	1233	1	0.23539
IFNGR1	12	0.7521	0.90805	0.999981	1521	3	0.12947	0.11662	0.34301	0.745876	835	5	0.12947
DummyGuide_1678	1	0.75243	0.75238	0.999981	1522	0	0.24976	0.24757	0.24726	0.636318	1232	1	0.24976
DummyGuide_1739	1	0.75261	0.75254	0.999981	1523	0	0.24	0.24739	0.2471	0.636318	1231	1	0.24
DummyGuide_1749	1	0.75278	0.75272	0.999981	1524	0	0.27369	0.24722	0.24691	0.636318	1229	1	0.27369
DummyGuide_1065	1	0.7539	0.75385	0.999981	1525	0	0.17532	0.2461	0.24562	0.63535	1225	1	0.17532
DummyGuide_1508	1	0.7542	0.75416	0.999981	1526	0	0.23535	0.2458	0.24537	0.63535	1223	1	0.23535
DummyGuide_1873	1	0.75549	0.75539	0.999981	1527	0	0.23729	0.24451	0.24417	0.63535	1221	1	0.23729
DummyGuide_1738	1	0.75561	0.75551	0.999981	1528	0	0.24257	0.24439	0.24403	0.63535	1220	1	0.24257
DummyGuide_1289	1	0.75626	0.75627	0.999981	1529	0	0.23401	0.24374	0.24329	0.63535	1219	1	0.23401
DummyGuide_1295	1	0.75685	0.75688	0.999981	1530	0	0.25182	0.24315	0.24257	0.63535	1215	1	0.25182
ADAMTS15	12	0.75773	0.91029	0.999981	1531	2	0.37432	0.003679	0.021878	0.246549	78	7	0.37432
DummyGuide_1946	1	0.75809	0.75813	0.999981	1532	0	0.23141	0.24191	0.24139	0.63535	1212	1	0.23141
COL1A2	12	0.75984	0.91116	0.999981	1533	1	0.36731	0.0010934	0.0076982	0.197098	29	10	0.36731
TMEM200B	12	0.76002	0.91122	0.999981	1534	3	-0.12072	0.63738	0.85622	0.999998	1813	3	-0.12072
GXYLT1	12	0.7605	0.91143	0.999981	1535	3	0.25197	0.0070717	0.038778	0.29828	125	8	0.25197
DummyGuide_1230	1	0.76068	0.76065	0.999981	1536	0	0.22561	0.23932	0.23886	0.630491	1208	1	0.22561
DummyGuide_1148	1	0.76239	0.76238	0.999981	1537	0	0.22066	0.23761	0.2371	0.627277	1206	1	0.22066
DummyGuide_1692	1	0.7628	0.76276	0.999981	1538	0	0.2375	0.2372	0.23671	0.626945	1204	1	0.2375
DummyGuide_1511	1	0.76297	0.76294	0.999981	1539	0	0.2554	0.23703	0.23655	0.626945	1202	1	0.2554
DCBLD2	12	0.76308	0.9123	0.999981	1540	3	0.11989	0.246	0.53997	0.915884	1224	6	0.11989
DummyGuide_1816	1	0.76368	0.76361	0.999981	1541	0	0.21715	0.23632	0.2358	0.626664	1200	1	0.21715
DummyGuide_1451	1	0.76521	0.76523	0.999981	1542	0	0.26884	0.23479	0.23426	0.624692	1198	1	0.26884
DummyGuide_1401	1	0.76533	0.76538	0.999981	1543	0	0.24141	0.23467	0.23417	0.624692	1196	1	0.24141
DummyGuide_1756	1	0.76622	0.76642	0.999981	1544	0	0.23749	0.23378	0.23331	0.624107	1194	1	0.23749
DummyGuide_1343	1	0.76686	0.76707	0.999981	1545	0	0.25905	0.23314	0.2326	0.623825	1191	1	0.25905
DummyGuide_1071	1	0.76728	0.76749	0.999981	1546	0	0.25402	0.23272	0.23223	0.623541	1189	1	0.25402
DummyGuide_1999	1	0.76733	0.76755	0.999981	1547	0	0.25665	0.23267	0.23218	0.623541	1187	1	0.25665
DummyGuide_1586	1	0.76757	0.76779	0.999981	1548	0	0.23227	0.23243	0.23191	0.623541	1185	1	0.23227
DummyGuide_1706	1	0.76845	0.76863	0.999981	1549	0	0.27773	0.23155	0.23106	0.622528	1182	1	0.27773
DummyGuide_1735	1	0.77016	0.7703	0.999981	1550	0	0.1973	0.22984	0.22917	0.619577	1178	1	0.1973
ITGAL	12	0.77124	0.91555	0.999981	1551	3	0.077821	0.23405	0.52339	0.902983	1195	5	0.077821
ITGB4	12	0.77144	0.91566	0.999981	1552	3	0.12271	0.13042	0.36638	0.769386	891	4	0.12271
DummyGuide_1647	1	0.77458	0.77482	0.999981	1553	0	0.23777	0.22542	0.22467	0.61023	1174	1	0.23777
LYPD3	12	0.77506	0.91711	0.999981	1554	2	0.11139	0.23376	0.52301	0.902983	1193	5	0.11139
LY6K	12	0.77531	0.91723	0.999981	1555	3	-0.049781	0.59744	0.83373	0.999998	1751	3	-0.049781
DNER	12	0.777	0.91783	0.999981	1556	3	0.16873	0.17739	0.44042	0.841362	1033	6	0.16873
DummyGuide_1602	1	0.7787	0.77911	0.999981	1557	0	0.27076	0.2213	0.22044	0.603665	1161	1	0.27076
IGLON5	12	0.77952	0.91878	0.999981	1558	2	0.18771	0.11526	0.34016	0.741704	830	7	0.18771
SERPINB2	12	0.78036	0.9191	0.999981	1559	3	0.065216	0.24148	0.53388	0.912114	1211	5	0.065216
SIGLEC5	12	0.78062	0.91923	0.999981	1560	3	0.15923	0.12219	0.35268	0.753021	864	6	0.15923
DummyGuide_1012	1	0.78077	0.78128	0.999981	1561	0	0.22774	0.21923	0.21848	0.599677	1157	1	0.22774
DummyGuide_1900	1	0.78153	0.78199	0.999981	1562	0	0.2414	0.21847	0.21774	0.599039	1154	1	0.2414
DummyGuide_1360	1	0.78165	0.78212	0.999981	1563	0	0.25246	0.21835	0.21763	0.599039	1152	1	0.25246
GLA	12	0.78203	0.91976	0.999981	1564	3	0.12998	0.0041597	0.024336	0.258255	85	6	0.12998
DummyGuide_1632	1	0.78483	0.78527	0.999981	1565	0	0.23985	0.21517	0.21431	0.593095	1146	1	0.23985
DummyGuide_1486	1	0.78507	0.78548	0.999981	1566	0	0.22221	0.21493	0.21408	0.593095	1143	1	0.22221
DummyGuide_1171	1	0.78571	0.78621	0.999981	1567	0	0.24241	0.21429	0.21344	0.593095	1141	1	0.24241
DummyGuide_1394	1	0.78583	0.78629	0.999981	1568	0	0.26064	0.21417	0.21335	0.593095	1139	1	0.26064
PRELP	12	0.78648	0.92152	0.999981	1569	2	0.31253	0.0073523	0.040075	0.301076	130	7	0.31253
FCGR3B	7	0.78762	0.881	0.999981	1570	1	0.15137	0.22014	0.44738	0.845372	1160	4	0.15137
ALPL	12	0.78785	0.92201	0.999981	1571	1	0.13794	0.072048	0.24248	0.63535	621	6	0.13794
DummyGuide_1435	1	0.78925	0.78962	0.999981	1572	0	0.2599	0.21075	0.20995	0.587272	1135	1	0.2599
CALML5	12	0.79074	0.92308	0.999981	1573	2	0.023892	0.073402	0.24558	0.63535	630	4	0.023892
DummyGuide_1646	1	0.79196	0.79237	0.999981	1574	0	0.24	0.20804	0.20734	0.583427	1131	1	0.24
DummyGuide_1154	1	0.79237	0.79273	0.999981	1575	0	0.26281	0.20763	0.20699	0.583165	1129	1	0.26281
DummyGuide_1513	1	0.79314	0.79345	0.999981	1576	0	0.25905	0.20686	0.20619	0.581841	1127	1	0.25905
NFASC	12	0.79358	0.92408	0.999981	1577	3	-0.048102	0.75713	0.91381	0.999998	1954	2	-0.048102
LTB4R	12	0.7937	0.92411	0.999981	1578	3	0.10149	0.45405	0.74313	0.999998	1565	5	0.10149
DummyGuide_1547	1	0.79408	0.79443	0.999981	1579	0	0.29127	0.20592	0.20517	0.581519	1125	1	0.29127
DummyGuide_1573	1	0.79443	0.79483	0.999981	1580	0	0.28084	0.20557	0.20484	0.5813	1124	1	0.28084
DummyGuide_1438	1	0.79449	0.79489	0.999981	1581	0	0.24904	0.20551	0.20478	0.5813	1123	1	0.24904
DummyGuide_1820	1	0.79461	0.79501	0.999981	1582	0	0.27653	0.20539	0.20465	0.5813	1121	1	0.27653
DummyGuide_1659	1	0.79467	0.79507	0.999981	1583	0	0.28233	0.20533	0.2046	0.5813	1120	1	0.28233
DummyGuide_1848	1	0.79526	0.79574	0.999981	1584	0	0.28176	0.20474	0.20409	0.5813	1115	1	0.28176
DummyGuide_1959	1	0.79585	0.79633	0.999981	1585	0	0.27738	0.20415	0.20344	0.5813	1113	1	0.27738
DummyGuide_1339	1	0.79644	0.79684	0.999981	1586	0	0.2851	0.20356	0.2028	0.5813	1111	1	0.2851
DummyGuide_1160	1	0.79744	0.7978	0.999981	1587	0	0.25722	0.20256	0.20177	0.5813	1109	1	0.25722
DummyGuide_1149	1	0.79862	0.7989	0.999981	1588	0	0.25913	0.20138	0.20062	0.579129	1105	1	0.25913
ERBB2	12	0.79931	0.92623	0.999981	1589	3	-0.016542	0.59026	0.82946	0.999998	1746	4	-0.016542
METTL9	12	0.79944	0.92626	0.999981	1590	3	0.37144	0.0019969	0.012949	0.210057	47	7	0.37144
DummyGuide_1747	1	0.79968	0.79993	0.999981	1591	0	0.30491	0.20032	0.19947	0.579129	1103	1	0.30491
DummyGuide_1415	1	0.80027	0.80053	0.999981	1592	0	0.26312	0.19973	0.1989	0.579129	1101	1	0.26312
FAT1	12	0.80088	0.9269	0.999981	1593	3	0.20649	0.083	0.26804	0.659268	679	7	0.20649
CD19	12	0.80111	0.92702	0.999981	1594	2	0.12139	0.63287	0.85345	0.999998	1804	4	0.12139
DummyGuide_1731	1	0.80233	0.8026	0.999981	1595	0	0.30739	0.19767	0.19696	0.574942	1095	1	0.30739
DummyGuide_1043	1	0.80256	0.80285	0.999981	1596	0	0.2762	0.19744	0.1967	0.574881	1094	1	0.2762
LGMN	12	0.80268	0.9277	0.999981	1597	3	0.15138	0.15375	0.40339	0.801456	967	6	0.15138
ZP4	12	0.80297	0.92781	0.999981	1598	2	0.030591	0.33167	0.63182	0.97242	1388	5	0.030591
LRRN1	12	0.80351	0.92802	0.999981	1599	2	0.1913	0.12517	0.35764	0.757274	878	6	0.1913
DummyGuide_1041	1	0.80445	0.80465	0.999981	1600	0	0.27498	0.19555	0.19478	0.570712	1091	1	0.27498
DummyGuide_1865	1	0.80468	0.80492	0.999981	1601	0	0.25179	0.19532	0.19456	0.570712	1090	1	0.25179
DummyGuide_1070	1	0.80598	0.80618	0.999981	1602	0	0.27378	0.19402	0.19333	0.568599	1087	1	0.27378
DummyGuide_1426	1	0.80728	0.80738	0.999981	1603	0	0.27441	0.19272	0.19205	0.566256	1086	1	0.27441
CNTNAP2	12	0.80748	0.92963	0.999981	1604	3	-0.049101	0.60291	0.83674	0.999998	1762	4	-0.049101
CADM4	12	0.80761	0.92966	0.999981	1605	3	-0.046296	0.9624	0.98419	0.999998	2212	1	-0.046296
DummyGuide_1567	1	0.80798	0.80802	0.999981	1606	0	0.25677	0.19202	0.19142	0.565811	1085	1	0.25677
DummyGuide_1367	1	0.80834	0.80832	0.999981	1607	0	0.27487	0.19166	0.19101	0.5653	1084	1	0.27487
RCN3	12	0.80839	0.92994	0.999981	1608	3	0.17087	0.032312	0.13482	0.480997	374	8	0.17087
IFNAR1	12	0.80881	0.9301	0.999981	1609	3	0.074997	0.15483	0.40523	0.80429	970	6	0.074997
TOR1AIP1	12	0.80905	0.93019	0.999981	1610	3	-0.043274	0.24993	0.5453	0.918228	1240	4	-0.043274
DummyGuide_1022	1	0.80987	0.80995	0.999981	1611	0	0.27588	0.19013	0.18939	0.562656	1080	1	0.27588
DummyGuide_1274	1	0.81016	0.81016	0.999981	1612	0	0.28148	0.18984	0.18915	0.562641	1079	1	0.28148
DummyGuide_1702	1	0.81034	0.81036	0.999981	1613	0	0.29247	0.18966	0.189	0.562641	1078	1	0.29247
DummyGuide_1480	1	0.81075	0.81078	0.999981	1614	0	0.24287	0.18925	0.1886	0.562435	1076	1	0.24287
DummyGuide_1693	1	0.81087	0.81088	0.999981	1615	0	0.26998	0.18913	0.18846	0.562435	1075	1	0.26998
DummyGuide_1157	1	0.8114	0.81146	0.999981	1616	0	0.3316	0.1886	0.18795	0.561925	1074	1	0.3316
DummyGuide_1461	1	0.81146	0.81152	0.999981	1617	0	0.27704	0.18854	0.1879	0.561925	1073	1	0.27704
CNR2	12	0.81147	0.93125	0.999981	1618	1	0.052745	0.36343	0.66168	0.991045	1431	4	0.052745
DummyGuide_1826	1	0.81163	0.81169	0.999981	1619	0	0.30085	0.18837	0.18774	0.561925	1072	1	0.30085
DummyGuide_1905	1	0.81252	0.81261	0.999981	1620	0	0.32502	0.18748	0.18683	0.561443	1069	1	0.32502
RTN4R	12	0.81287	0.93186	0.999981	1621	3	0.15894	0.10007	0.30727	0.700851	766	7	0.15894
FKRP	12	0.81341	0.93211	0.999981	1622	3	0.072706	0.17001	0.42908	0.826969	1015	6	0.072706
DummyGuide_1886	1	0.81352	0.81359	0.999981	1623	0	0.29511	0.18648	0.18576	0.558936	1065	1	0.29511
CNNM3	12	0.81376	0.93226	0.999981	1624	2	0.035027	0.43423	0.72587	0.999998	1536	5	0.035027
DummyGuide_1688	1	0.81393	0.81401	0.999981	1625	0	0.3125	0.18607	0.18527	0.558896	1064	1	0.3125
COL14A1	12	0.81421	0.93242	0.999981	1626	1	0.19743	0.054189	0.19782	0.576727	515	7	0.19743
DummyGuide_1309	1	0.81482	0.81485	0.999981	1627	0	0.29871	0.18518	0.18438	0.556937	1062	1	0.29871
M6PR	12	0.81496	0.93273	0.999981	1628	2	0.31125	0.0087459	0.046926	0.318826	151	7	0.31125
FLNA	12	0.81539	0.93292	0.999981	1629	2	-0.024467	0.11951	0.3482	0.749609	849	4	-0.024467
DummyGuide_1184	1	0.81599	0.81599	0.999981	1630	0	0.29197	0.18401	0.18324	0.55564	1060	1	0.29197
DummyGuide_1462	1	0.81623	0.8162	0.999981	1631	0	0.27419	0.18377	0.183	0.55564	1059	1	0.27419
CD46	12	0.81631	0.93334	0.999981	1632	2	-0.0024282	0.024118	0.10632	0.447604	301	5	-0.0024282
DummyGuide_1431	1	0.81688	0.81685	0.999981	1633	0	0.3171	0.18312	0.18247	0.555465	1056	1	0.3171
DummyGuide_1778	1	0.81694	0.8169	0.999981	1634	0	0.28997	0.18306	0.18238	0.555465	1055	1	0.28997
DummyGuide_1907	1	0.81729	0.81722	0.999981	1635	0	0.28901	0.18271	0.18204	0.555465	1053	1	0.28901
CD68	12	0.81773	0.93393	0.999981	1636	3	0.31339	0.024454	0.10746	0.448121	305	8	0.31339
DummyGuide_1350	1	0.81788	0.81786	0.999981	1637	0	0.27955	0.18212	0.18147	0.555315	1049	1	0.27955
SLC2A4	12	0.81788	0.93399	0.999981	1638	3	0.074855	0.14569	0.39103	0.791519	934	5	0.074855
DummyGuide_1612	1	0.81811	0.8181	0.999981	1639	0	0.28269	0.18189	0.18124	0.555315	1048	1	0.28269
PTGER2	12	0.81834	0.93415	0.999981	1640	3	0.0063352	0.019023	0.087624	0.414514	258	5	0.0063352
DummyGuide_1348	1	0.81859	0.81853	0.999981	1641	0	0.25246	0.18141	0.1808	0.554708	1047	1	0.25246
LAMA5	12	0.81878	0.93433	0.999981	1642	3	0.10989	0.23212	0.52069	0.902682	1184	6	0.10989
SLC9A7	12	0.82004	0.93477	0.999981	1643	2	0.12036	0.16375	0.41915	0.820176	992	5	0.12036
DummyGuide_1545	1	0.82006	0.81988	0.999981	1644	0	0.28081	0.17994	0.17938	0.55251	1042	1	0.28081
DummyGuide_1661	1	0.82024	0.82008	0.999981	1645	0	0.27629	0.17976	0.17924	0.55251	1040	1	0.27629
DummyGuide_1505	1	0.82041	0.82024	0.999981	1646	0	0.30172	0.17959	0.17904	0.55251	1038	1	0.30172
DummyGuide_1727	1	0.82159	0.82141	0.999981	1647	0	0.35675	0.17841	0.17802	0.550504	1034	1	0.35675
BMPR2	12	0.82173	0.93547	0.999981	1648	2	0.08052	0.26989	0.57224	0.935757	1283	6	0.08052
DummyGuide_1690	1	0.82324	0.82303	0.999981	1649	0	0.35383	0.17676	0.17642	0.548435	1031	1	0.35383
DummyGuide_1368	1	0.82389	0.82373	0.999981	1650	0	0.29271	0.17611	0.17575	0.547769	1030	1	0.29271
DummyGuide_1490	1	0.82465	0.82454	0.999981	1651	0	0.33317	0.17535	0.17504	0.546328	1027	1	0.33317
DummyGuide_1682	1	0.82483	0.8247	0.999981	1652	0	0.32446	0.17517	0.17489	0.546328	1026	1	0.32446
TRPV2	12	0.82507	0.93691	0.999981	1653	3	0.32788	0.017888	0.083257	0.406054	248	7	0.32788
DummyGuide_1412	1	0.82583	0.82576	0.999981	1654	0	0.29625	0.17417	0.17395	0.546328	1024	1	0.29625
DummyGuide_1497	1	0.82624	0.82615	0.999981	1655	0	0.28589	0.17376	0.17349	0.54585	1023	1	0.28589
DummyGuide_1226	1	0.82683	0.82664	0.999981	1656	0	0.25997	0.17317	0.1729	0.544734	1022	1	0.25997
HLA-A	12	0.82743	0.93794	0.999981	1657	3	0.075269	0.085843	0.27461	0.665655	696	5	0.075269
DummyGuide_1761	1	0.82748	0.82731	0.999981	1658	0	0.30584	0.17252	0.17221	0.544027	1021	1	0.30584
DummyGuide_1259	1	0.82784	0.82769	0.999981	1659	0	0.2579	0.17216	0.17185	0.544027	1020	1	0.2579
DummyGuide_1485	1	0.82813	0.82801	0.999981	1660	0	0.33525	0.17187	0.17157	0.544027	1019	1	0.33525
SLC9A9	12	0.8286	0.9385	0.999981	1661	2	0.2635	0.0023913	0.015128	0.220019	53	9	0.2635
LAMB3	12	0.82906	0.93865	0.999981	1662	2	0.20221	0.078121	0.25681	0.647275	656	6	0.20221
DummyGuide_1113	1	0.8306	0.8304	0.999981	1663	0	0.29686	0.1694	0.16909	0.539254	1014	1	0.29686
TMEM132E	12	0.83169	0.93988	0.999981	1664	3	0.2478	0.016401	0.077651	0.396329	232	6	0.2478
DummyGuide_1736	1	0.83219	0.83193	0.999981	1665	0	0.28303	0.16781	0.16741	0.535606	1009	1	0.28303
DummyGuide_1975	1	0.83225	0.83199	0.999981	1666	0	0.26598	0.16775	0.16733	0.535606	1007	1	0.26598
DummyGuide_1243	1	0.83308	0.83277	0.999981	1667	0	0.31127	0.16692	0.16646	0.535217	1004	1	0.31127
DummyGuide_1998	1	0.83437	0.83419	0.999981	1668	0	0.31088	0.16563	0.16523	0.532008	1001	1	0.31088
DummyGuide_1804	1	0.83496	0.83473	0.999981	1669	0	0.28874	0.16504	0.16457	0.530615	1000	1	0.28874
ADRA2A	12	0.83511	0.94127	0.999981	1670	2	0.067036	0.078662	0.25798	0.647392	659	6	0.067036
DummyGuide_1550	1	0.83549	0.83523	0.999981	1671	0	0.30022	0.16451	0.16409	0.529778	998	1	0.30022
DummyGuide_1082	1	0.83573	0.83544	0.999981	1672	0	0.27717	0.16427	0.16385	0.52973	997	1	0.27717
DummyGuide_1325	1	0.83591	0.83563	0.999981	1673	0	0.28254	0.16409	0.16363	0.52973	996	1	0.28254
DummyGuide_1040	1	0.83596	0.83569	0.999981	1674	0	0.27459	0.16404	0.16356	0.52973	995	1	0.27459
NMUR1	12	0.83633	0.94181	0.999981	1675	2	0.14235	0.0049881	0.028582	0.269375	96	6	0.14235
DummyGuide_1010	1	0.83679	0.8365	0.999981	1676	0	0.27658	0.16321	0.16277	0.528448	989	1	0.27658
DummyGuide_1600	1	0.83685	0.83658	0.999981	1677	0	0.32072	0.16315	0.1627	0.528448	988	1	0.32072
DummyGuide_1594	1	0.8375	0.83726	0.999981	1678	0	0.31338	0.1625	0.16212	0.527785	986	1	0.31338
DummyGuide_1629	1	0.83761	0.83738	0.999981	1679	0	0.29374	0.16239	0.16199	0.527785	985	1	0.29374
DummyGuide_1562	1	0.8382	0.83798	0.999981	1680	0	0.35384	0.1618	0.1614	0.526897	983	1	0.35384
BCAM	12	0.83884	0.94285	0.999981	1681	3	0.15851	0.16388	0.41938	0.820176	993	6	0.15851
DummyGuide_1854	1	0.83891	0.83871	0.999981	1682	0	0.38744	0.16109	0.16074	0.525491	981	1	0.38744
PKD2	12	0.83905	0.94296	0.999981	1683	3	0.050275	0.47238	0.75852	0.999998	1602	4	0.050275
PLXNA3	12	0.83913	0.943	0.999981	1684	2	0.14049	0.12001	0.34905	0.749796	854	6	0.14049
CDH6	12	0.83939	0.94308	0.999981	1685	2	0.060261	0.37003	0.66793	0.994811	1440	5	0.060261
DummyGuide_1862	1	0.84003	0.83989	0.999981	1686	0	0.34626	0.15997	0.15961	0.523997	980	1	0.34626
P2RY11	12	0.84027	0.94341	0.999981	1687	2	0.039896	0.23166	0.52008	0.90235	1183	6	0.039896
DummyGuide_1473	1	0.84074	0.84064	0.999981	1688	0	0.36777	0.15926	0.15892	0.523938	979	1	0.36777
ADAM9	12	0.84202	0.94416	0.999981	1689	3	0.30955	0.0061872	0.03444	0.293735	113	8	0.30955
DummyGuide_1571	1	0.84209	0.84205	0.999981	1690	0	0.32527	0.15791	0.15764	0.520436	978	1	0.32527
DummyGuide_1407	1	0.8425	0.84247	0.999981	1691	0	0.33909	0.1575	0.15716	0.51969	977	1	0.33909
CHPF2	12	0.84273	0.94447	0.999981	1692	3	-0.047004	0.97802	0.98897	0.999998	2237	1	-0.047004
CXCR1	12	0.84279	0.94449	0.999981	1693	2	0.052847	0.068949	0.23461	0.624904	608	6	0.052847
DummyGuide_1716	1	0.84286	0.84281	0.999981	1694	0	0.29736	0.15714	0.15683	0.51969	975	1	0.29736
DummyGuide_1077	1	0.84368	0.84365	0.999981	1695	0	0.28455	0.15632	0.156	0.518664	973	1	0.28455
DummyGuide_1414	1	0.8438	0.84373	0.999981	1696	0	0.30487	0.1562	0.15586	0.518664	972	1	0.30487
OLR1	12	0.84455	0.94517	0.999981	1697	3	-0.017178	0.64635	0.86116	0.999998	1829	3	-0.017178
IL10RA	12	0.84485	0.94528	0.999981	1698	2	0.25246	0.0019841	0.012847	0.210057	46	9	0.25246
DummyGuide_1151	1	0.84616	0.84606	0.999981	1699	0	0.29814	0.15384	0.15377	0.513448	969	1	0.29814
C11orf24	12	0.84646	0.94599	0.999981	1700	3	0.041224	0.39585	0.69188	0.999998	1485	4	0.041224
DummyGuide_1150	1	0.84763	0.84757	0.999981	1701	0	0.31271	0.15237	0.15231	0.511497	965	1	0.31271
DummyGuide_1061	1	0.84804	0.848	0.999981	1702	0	0.35682	0.15196	0.15198	0.511179	964	1	0.35682
COL7A1	12	0.84805	0.94674	0.999981	1703	3	0.21315	0.063954	0.22248	0.606672	589	7	0.21315
FAM174B	12	0.84816	0.94678	0.999981	1704	1	0.20358	0.037172	0.15159	0.511179	408	7	0.20358
DummyGuide_1195	1	0.84816	0.84811	0.999981	1705	0	0.34766	0.15184	0.15185	0.511179	963	1	0.34766
CD79A	12	0.84874	0.94701	0.999981	1706	3	-0.033292	0.71517	0.89927	0.999998	1922	4	-0.033292
DummyGuide_1773	1	0.84881	0.84873	0.999981	1707	0	0.33168	0.15119	0.1513	0.511179	962	1	0.33168
DummyGuide_1045	1	0.84887	0.8488	0.999981	1708	0	0.37188	0.15113	0.15125	0.511179	960	1	0.37188
DummyGuide_1186	1	0.8494	0.84927	0.999981	1709	0	0.31815	0.1506	0.15072	0.511179	955	1	0.31815
DummyGuide_1689	1	0.84957	0.84944	0.999981	1710	0	0.38982	0.15043	0.15053	0.511179	952	1	0.38982
DummyGuide_1845	1	0.85016	0.85011	0.999981	1711	0	0.35727	0.14984	0.14997	0.511179	949	1	0.35727
DummyGuide_1337	1	0.85046	0.85036	0.999981	1712	0	0.31454	0.14954	0.14961	0.511179	947	1	0.31454
PLTP	12	0.85047	0.94776	0.999981	1713	2	0.2409	0.027967	0.11974	0.462309	337	7	0.2409
L1CAM	12	0.85109	0.94798	0.999981	1714	3	0.044849	0.2198	0.50334	0.889764	1159	5	0.044849
DummyGuide_1209	1	0.85146	0.85132	0.999981	1715	0	0.32548	0.14854	0.14869	0.509792	945	1	0.32548
DummyGuide_1058	1	0.85163	0.85149	0.999981	1716	0	0.3547	0.14837	0.14852	0.509792	944	1	0.3547
DummyGuide_1134	1	0.85205	0.85189	0.999981	1717	0	0.30619	0.14795	0.1481	0.50977	943	1	0.30619
DummyGuide_1630	1	0.85281	0.85268	0.999981	1718	0	0.31853	0.14719	0.14733	0.507855	941	1	0.31853
DummyGuide_1644	1	0.85334	0.85326	0.999981	1719	0	0.30445	0.14666	0.14681	0.507557	939	1	0.30445
SULF1	12	0.85335	0.949	0.999981	1720	1	0.12024	0.4718	0.75801	0.999998	1599	5	0.12024
DummyGuide_1028	1	0.85346	0.85337	0.999981	1721	0	0.35588	0.14654	0.14668	0.507557	936	1	0.35588
TNFSF18	12	0.85389	0.94923	0.999981	1722	2	0.15718	0.16118	0.41505	0.816865	982	5	0.15718
DummyGuide_1236	1	0.85546	0.85555	0.999981	1723	0	0.41595	0.14454	0.14478	0.504266	933	1	0.41595
DummyGuide_1569	1	0.85552	0.85561	0.999981	1724	0	0.73203	0.14448	0.14472	0.504266	932	1	0.73203
RALY	12	0.85676	0.95042	0.999981	1725	3	0.093035	0.14604	0.39155	0.791862	935	6	0.093035
DummyGuide_1060	1	0.85694	0.85705	0.999981	1726	0	0.31791	0.14306	0.1433	0.502102	929	1	0.31791
DummyGuide_1931	1	0.85711	0.85724	0.999981	1727	0	0.34849	0.14289	0.1431	0.502102	928	1	0.34849
PODXL	12	0.85873	0.95132	0.999981	1728	1	0.06823	0.42477	0.71776	0.999998	1526	5	0.06823
DummyGuide_1464	1	0.85959	0.85975	0.999981	1729	0	0.33022	0.14041	0.14048	0.495907	925	1	0.33022
SIGLEC7	12	0.86005	0.95191	0.999981	1730	3	0.025484	0.37087	0.66886	0.994811	1444	5	0.025484
ST14	12	0.86107	0.95239	0.999981	1731	3	0.12322	0.17677	0.43943	0.841297	1032	6	0.12322
SLC43A3	12	0.8613	0.95253	0.999981	1732	1	0.27648	0.019419	0.089014	0.418973	262	8	0.27648
DummyGuide_2000	1	0.86224	0.86241	0.999981	1733	0	0.37482	0.13776	0.13784	0.487336	918	1	0.37482
DummyGuide_1377	1	0.86253	0.86271	0.999981	1734	0	0.34989	0.13747	0.13755	0.48704	917	1	0.34989
DummyGuide_1139	1	0.86271	0.8629	0.999981	1735	0	0.34117	0.13729	0.1374	0.48704	915	1	0.34117
CHST12	12	0.86282	0.95309	0.999981	1736	3	0.14162	0.24695	0.5412	0.915884	1228	6	0.14162
DummyGuide_1698	1	0.86424	0.86454	0.999981	1737	0	0.39411	0.13576	0.13592	0.483443	911	1	0.39411
DummyGuide_1984	1	0.86489	0.86518	0.999981	1738	0	0.34029	0.13511	0.13519	0.481605	908	1	0.34029
PMEPA1	12	0.86493	0.95402	0.999981	1739	2	0.21292	0.038946	0.15719	0.51969	427	7	0.21292
DummyGuide_1833	1	0.8653	0.86552	0.999981	1740	0	0.34447	0.1347	0.13481	0.480997	907	1	0.34447
RYK	12	0.8654	0.95424	0.999981	1741	2	0.18687	0.092723	0.29011	0.682746	729	6	0.18687
DummyGuide_1813	1	0.86571	0.86598	0.999981	1742	0	0.31854	0.13429	0.13443	0.480997	906	1	0.31854
DummyGuide_1777	1	0.86619	0.86641	0.999981	1743	0	0.40378	0.13381	0.13397	0.480895	904	1	0.40378
DummyGuide_1196	1	0.86648	0.86672	0.999981	1744	0	0.30896	0.13352	0.1337	0.480676	902	1	0.30896
DummyGuide_1680	1	0.86683	0.86705	0.999981	1745	0	0.40352	0.13317	0.13336	0.480183	900	1	0.40352
SGCZ	12	0.8673	0.95502	0.999981	1746	2	0.15976	0.10743	0.32317	0.722116	798	6	0.15976
DummyGuide_1945	1	0.86784	0.86805	0.999981	1747	0	0.34335	0.13216	0.13239	0.478892	899	1	0.34335
PCDHA6	12	0.86807	0.95532	0.999981	1748	3	0.209	0.09385	0.29293	0.685258	733	7	0.209
DummyGuide_1733	1	0.86819	0.86839	0.999981	1749	0	0.33305	0.13181	0.13196	0.478086	898	1	0.33305
DummyGuide_1950	1	0.8686	0.8688	0.999981	1750	0	0.33219	0.1314	0.13157	0.477386	896	1	0.33219
DummyGuide_1648	1	0.86878	0.86899	0.999981	1751	0	0.34576	0.13122	0.13135	0.477343	895	1	0.34576
PTPRK	12	0.86885	0.95565	0.999981	1752	2	0.15144	0.058169	0.20766	0.58363	545	6	0.15144
DummyGuide_1978	1	0.86931	0.86946	0.999981	1753	0	0.42268	0.13069	0.13087	0.476331	893	1	0.42268
DummyGuide_1789	1	0.87007	0.87025	0.999981	1754	0	0.41215	0.12993	0.13004	0.475518	890	1	0.41215
DummyGuide_1069	1	0.8706	0.87077	0.999981	1755	0	0.37001	0.1294	0.12957	0.474544	889	1	0.37001
MMRN1	12	0.87116	0.95666	0.999981	1756	3	-0.041291	0.77621	0.92072	0.999998	1973	2	-0.041291
DummyGuide_1238	1	0.87155	0.87171	0.999981	1757	0	0.33986	0.12845	0.12858	0.471676	887	1	0.33986
LRP11	12	0.8716	0.95687	0.999981	1758	3	0.2508	0.035892	0.14724	0.507855	397	7	0.2508
CD82	12	0.87219	0.95712	0.999981	1759	2	0.1903	0.107	0.32232	0.720906	795	7	0.1903
PLA2G3	12	0.87283	0.95742	0.999981	1760	2	0.009416	0.29848	0.60044	0.954197	1335	4	0.009416
DummyGuide_1359	1	0.8732	0.87342	0.999981	1761	0	0.39417	0.1268	0.127	0.468789	883	1	0.39417
VDAC1	3	0.87336	0.87367	0.999981	1762	0	0.44484	0.049784	0.11957	0.462309	491	2	0.44484
DummyGuide_1304	1	0.87337	0.87357	0.999981	1763	0	0.35024	0.12663	0.12685	0.468789	882	1	0.35024
CD180	12	0.87349	0.95756	0.999981	1764	1	0.12225	0.41498	0.70917	0.999998	1513	5	0.12225
DummyGuide_1080	1	0.87455	0.87476	0.999981	1765	0	0.39103	0.12545	0.12567	0.466686	880	1	0.39103
SCN2B	12	0.87457	0.95786	0.999981	1766	2	0.31456	0.0025766	0.01615	0.222685	59	9	0.31456
DummyGuide_1590	1	0.87461	0.87483	0.999981	1767	0	0.41325	0.12539	0.12561	0.466686	879	1	0.41325
DummyGuide_1459	1	0.87485	0.87508	0.999981	1768	0	0.34476	0.12515	0.1254	0.466686	877	1	0.34476
DummyGuide_1019	1	0.87526	0.87552	0.999981	1769	0	0.33059	0.12474	0.12499	0.466686	876	1	0.33059
JAM3	12	0.8756	0.95811	0.999981	1770	2	0.40955	0.0012355	0.0085261	0.197098	33	9	0.40955
MME	12	0.8757	0.95813	0.999981	1771	2	0.20665	0.086192	0.27538	0.666839	697	7	0.20665
DummyGuide_1192	1	0.8772	0.87738	0.999981	1772	0	0.49148	0.1228	0.12308	0.463082	869	1	0.49148
DummyGuide_1207	1	0.87726	0.87744	0.999981	1773	0	0.38118	0.12274	0.12303	0.463082	868	1	0.38118
LAMB1	12	0.87727	0.95838	0.999981	1774	2	0.18133	0.07182	0.24188	0.63535	619	6	0.18133
DummyGuide_1697	1	0.87756	0.87772	0.999981	1775	0	0.33402	0.12244	0.12268	0.463082	867	1	0.33402
DummyGuide_1856	1	0.87779	0.87796	0.999981	1776	0	0.40082	0.12221	0.12241	0.463082	865	1	0.40082
DummyGuide_1580	1	0.87791	0.87807	0.999981	1777	0	0.37324	0.12209	0.12232	0.463082	863	1	0.37324
DummyGuide_1219	1	0.87797	0.87812	0.999981	1778	0	0.38575	0.12203	0.12222	0.463082	862	1	0.38575
HLA-DQA1	12	0.87891	0.95873	0.999981	1779	1	0.14029	0.081935	0.26549	0.658531	672	6	0.14029
DummyGuide_1395	1	0.87938	0.87955	0.999981	1780	0	0.35304	0.12062	0.12082	0.462399	858	1	0.35304
DummyGuide_1055	1	0.87956	0.87975	0.999981	1781	0	0.40538	0.12044	0.12068	0.462399	857	1	0.40538
DummyGuide_1275	1	0.87979	0.88002	0.999981	1782	0	0.41334	0.12021	0.12044	0.462399	856	1	0.41334
ARSF	12	0.87982	0.95897	0.999981	1783	1	0.22305	0.016646	0.078488	0.396498	234	7	0.22305
DummyGuide_1720	1	0.88003	0.88027	0.999981	1784	0	0.36089	0.11997	0.12026	0.462399	853	1	0.36089
DummyGuide_1135	1	0.88032	0.88054	0.999981	1785	0	0.37993	0.11968	0.11992	0.462309	850	1	0.37993
DummyGuide_1494	1	0.88056	0.8808	0.999981	1786	0	0.37803	0.11944	0.11965	0.462309	848	1	0.37803
DummyGuide_1132	1	0.88085	0.88108	0.999981	1787	0	0.35356	0.11915	0.11941	0.462309	846	1	0.35356
DummyGuide_1388	1	0.8818	0.88212	0.999981	1788	0	0.34967	0.1182	0.11842	0.46033	844	1	0.34967
DummyGuide_1385	1	0.88215	0.88247	0.999981	1789	0	0.3929	0.11785	0.1181	0.46033	842	1	0.3929
TRHR	12	0.88263	0.95954	0.999981	1790	2	0.12536	0.09234	0.28928	0.682167	725	5	0.12536
DummyGuide_1129	1	0.88268	0.88299	0.999981	1791	0	0.37984	0.11732	0.11757	0.46033	841	1	0.37984
DummyGuide_1752	1	0.88274	0.88305	0.999981	1792	0	0.37131	0.11726	0.1175	0.46033	840	1	0.37131
DummyGuide_1193	1	0.88297	0.88325	0.999981	1793	0	0.38986	0.11703	0.1172	0.46033	838	1	0.38986
C6orf120	12	0.88332	0.95971	0.999981	1794	2	0.15513	0.027052	0.11658	0.460246	326	6	0.15513
DummyGuide_1609	1	0.88333	0.88356	0.999981	1795	0	0.34816	0.11667	0.11683	0.460246	837	1	0.34816
DummyGuide_1214	1	0.88351	0.88374	0.999981	1796	0	0.34062	0.11649	0.11667	0.460246	834	1	0.34062
FLG2	12	0.88372	0.95982	0.999981	1797	2	0.16846	0.14447	0.38912	0.7897	931	6	0.16846
DummyGuide_1484	1	0.88451	0.88472	0.999981	1798	0	0.33863	0.11549	0.1157	0.459666	832	1	0.33863
DummyGuide_1190	1	0.88474	0.88496	0.999981	1799	0	0.35878	0.11526	0.11549	0.459589	831	1	0.35878
DummyGuide_1662	1	0.88504	0.88526	0.999981	1800	0	0.37086	0.11496	0.11519	0.459589	828	1	0.37086
DummyGuide_1145	1	0.88521	0.88546	0.999981	1801	0	0.40776	0.11479	0.11501	0.459589	825	1	0.40776
DummyGuide_1331	1	0.88604	0.88637	0.999981	1802	0	0.42558	0.11396	0.11414	0.458919	822	1	0.42558
DummyGuide_1721	1	0.8868	0.88715	0.999981	1803	0	0.3861	0.1132	0.11338	0.457431	819	1	0.3861
DummyGuide_1543	1	0.88692	0.88726	0.999981	1804	0	0.38968	0.11308	0.11329	0.457431	818	1	0.38968
DummyGuide_1884	1	0.88722	0.88758	0.999981	1805	0	0.38888	0.11278	0.113	0.457431	817	1	0.38888
DummyGuide_1053	1	0.88728	0.88762	0.999981	1806	0	0.37911	0.11272	0.11296	0.457431	816	1	0.37911
DummyGuide_1084	1	0.88733	0.8877	0.999981	1807	0	0.41024	0.11267	0.1129	0.457431	814	1	0.41024
DummyGuide_1551	1	0.88781	0.88818	0.999981	1808	0	0.35884	0.11219	0.11241	0.457431	813	1	0.35884
DummyGuide_1642	1	0.88822	0.88861	0.999981	1809	0	0.37299	0.11178	0.11209	0.456918	812	1	0.37299
DummyGuide_1800	1	0.88839	0.88873	0.999981	1810	0	0.44517	0.11161	0.11189	0.456903	811	1	0.44517
DummyGuide_1458	1	0.88845	0.88881	0.999981	1811	0	0.37955	0.11155	0.11181	0.456903	810	1	0.37955
DummyGuide_1674	1	0.88993	0.89028	0.999981	1812	0	0.36382	0.11007	0.11047	0.45429	808	1	0.36382
SDK1	12	0.89014	0.96127	0.999981	1813	2	0.31147	0.026603	0.11501	0.459589	319	7	0.31147
DummyGuide_1144	1	0.89016	0.89045	0.999981	1814	0	0.41702	0.10984	0.11028	0.454288	806	1	0.41702
DummyGuide_1398	1	0.89152	0.89191	0.999981	1815	0	0.35684	0.10848	0.10879	0.450521	803	1	0.35684
DummyGuide_1556	1	0.89169	0.89208	0.999981	1816	0	0.41402	0.10831	0.10858	0.450478	801	1	0.41402
DummyGuide_1392	1	0.89216	0.89255	0.999981	1817	0	0.34543	0.10784	0.10811	0.44931	800	1	0.34543
CD79B	12	0.89226	0.9618	0.999981	1818	1	0.18388	0.028655	0.12219	0.463082	344	8	0.18388
DummyGuide_1379	1	0.89264	0.89303	0.999981	1819	0	0.39145	0.10736	0.10763	0.448121	797	1	0.39145
DummyGuide_1849	1	0.89293	0.89328	0.999981	1820	0	0.3889	0.10707	0.10733	0.448121	796	1	0.3889
PLXNA4	12	0.89309	0.96206	0.999981	1821	2	0.15033	0.20916	0.48803	0.8798	1133	6	0.15033
TFPI2	12	0.89327	0.96213	0.999981	1822	1	0.18155	0.090639	0.28561	0.676713	718	7	0.18155
DummyGuide_1614	1	0.89328	0.8936	0.999981	1823	0	0.38949	0.10672	0.10694	0.447604	792	1	0.38949
DummyGuide_1944	1	0.89334	0.89367	0.999981	1824	0	0.33105	0.10666	0.10688	0.447604	791	1	0.33105
DummyGuide_1548	1	0.8937	0.89408	0.999981	1825	0	0.38795	0.1063	0.10652	0.447604	790	1	0.38795
DummyGuide_1094	1	0.89381	0.8942	0.999981	1826	0	0.36327	0.10619	0.10642	0.447604	789	1	0.36327
DummyGuide_1269	1	0.89476	0.89513	0.999981	1827	0	0.35588	0.10524	0.10552	0.447254	785	1	0.35588
DummyGuide_1423	1	0.89529	0.8957	0.999981	1828	0	0.36944	0.10471	0.10499	0.446127	784	1	0.36944
DummyGuide_1563	1	0.89735	0.89773	0.999981	1829	0	0.39647	0.10265	0.10301	0.440603	781	1	0.39647
DummyGuide_1574	1	0.89747	0.89785	0.999981	1830	0	0.41153	0.10253	0.10287	0.440603	780	1	0.41153
DummyGuide_1374	1	0.89811	0.89855	0.999981	1831	0	0.3866	0.10189	0.10222	0.438844	778	1	0.3866
DummyGuide_1354	1	0.89841	0.8988	0.999981	1832	0	0.37325	0.10159	0.10193	0.438378	777	1	0.37325
DummyGuide_1544	1	0.89894	0.89931	0.999981	1833	0	0.38635	0.10106	0.10145	0.437109	774	1	0.38635
DummyGuide_1429	1	0.89941	0.89989	0.999981	1834	0	0.36941	0.10059	0.10097	0.435853	771	1	0.36941
DummyGuide_1832	1	0.89971	0.90019	0.999981	1835	0	0.39106	0.10029	0.10064	0.435251	768	1	0.39106
DummyGuide_1769	1	0.89994	0.90043	0.999981	1836	0	0.40221	0.10006	0.10038	0.435251	765	1	0.40221
DummyGuide_1115	1	0.9	0.90049	0.999981	1837	0	0.37988	0.1	0.10032	0.435251	764	1	0.37988
DummyGuide_1744	1	0.90047	0.90101	0.999981	1838	0	0.35672	0.099529	0.099802	0.435251	762	1	0.35672
FBN2	12	0.90049	0.96388	0.999981	1839	1	0.17084	0.036351	0.14876	0.509792	400	8	0.17084
DummyGuide_1450	1	0.90053	0.90106	0.999981	1840	0	0.36767	0.09947	0.099696	0.435251	761	1	0.36767
DummyGuide_1303	1	0.90059	0.90113	0.999981	1841	0	0.36843	0.099411	0.099624	0.435251	760	1	0.36843
TLR2	12	0.90066	0.96393	0.999981	1842	2	0.46831	0.0018048	0.011855	0.208926	41	8	0.46831
DummyGuide_1057	1	0.90071	0.90122	0.999981	1843	0	0.42509	0.099293	0.099532	0.435251	759	1	0.42509
DummyGuide_1971	1	0.90124	0.90177	0.999981	1844	0	0.40311	0.098763	0.099016	0.435251	755	1	0.40311
AXL	12	0.9021	0.96427	0.999981	1845	1	0.090027	0.035585	0.14619	0.507557	393	6	0.090027
DummyGuide_1549	1	0.90218	0.90266	0.999981	1846	0	0.4587	0.09782	0.097926	0.435251	752	1	0.4587
DummyGuide_1281	1	0.90253	0.903	0.999981	1847	0	0.41051	0.097467	0.097597	0.435251	748	1	0.41051
DummyGuide_1091	1	0.90265	0.90313	0.999981	1848	0	0.43926	0.097349	0.097479	0.435251	746	1	0.43926
DummyGuide_1066	1	0.90271	0.90318	0.999981	1849	0	0.38748	0.09729	0.09739	0.435251	745	1	0.38748
DummyGuide_1631	1	0.90336	0.9038	0.999981	1850	0	0.37323	0.096642	0.096727	0.435178	742	1	0.37323
DummyGuide_1103	1	0.90412	0.9046	0.999981	1851	0	0.39601	0.095876	0.095992	0.433536	739	1	0.39601
PCDHA10	12	0.90475	0.96496	0.999981	1852	1	0.20457	0.06546	0.22624	0.612369	594	7	0.20457
DummyGuide_1532	1	0.90483	0.90531	0.999981	1853	0	0.37891	0.095169	0.095379	0.431601	738	1	0.37891
DummyGuide_1763	1	0.90489	0.90539	0.999981	1854	0	0.43332	0.09511	0.095333	0.431601	737	1	0.43332
APLF	12	0.90541	0.96515	0.999981	1855	1	0.10826	0.16612	0.423	0.824198	1003	5	0.10826
DummyGuide_1020	1	0.90548	0.90598	0.999981	1856	0	0.39715	0.094521	0.094729	0.430319	736	1	0.39715
DummyGuide_1326	1	0.90589	0.90637	0.999981	1857	0	0.39689	0.094109	0.094285	0.429789	734	1	0.39689
DummyGuide_1657	1	0.90619	0.90666	0.999981	1858	0	0.3953	0.093814	0.093943	0.429246	732	1	0.3953
DummyGuide_1619	1	0.90666	0.90708	0.999981	1859	0	0.44046	0.093343	0.093517	0.428969	731	1	0.44046
DummyGuide_1470	1	0.9073	0.90778	0.999981	1860	0	0.45725	0.092695	0.092803	0.427367	728	1	0.45725
DummyGuide_1617	1	0.90742	0.90794	0.999981	1861	0	0.39415	0.092577	0.092689	0.427367	727	1	0.39415
DummyGuide_1559	1	0.9076	0.90811	0.999981	1862	0	0.45176	0.092401	0.092524	0.427367	726	1	0.45176
DummyGuide_1728	1	0.90789	0.90842	0.999981	1863	0	0.45432	0.092106	0.092203	0.427367	724	1	0.45432
DummyGuide_1753	1	0.90872	0.90925	0.999981	1864	0	0.47068	0.091281	0.091375	0.424967	721	1	0.47068
DummyGuide_1340	1	0.90901	0.90952	0.999981	1865	0	0.42192	0.090987	0.091067	0.424375	720	1	0.42192
DummyGuide_1627	1	0.90972	0.91025	0.999981	1866	0	0.39251	0.09028	0.090277	0.422373	717	1	0.39251
DummyGuide_1111	1	0.91025	0.91071	0.999981	1867	0	0.46544	0.08975	0.089736	0.420683	713	1	0.46544
DummyGuide_1211	1	0.91054	0.91096	0.999981	1868	0	0.38201	0.089455	0.089479	0.420316	711	1	0.38201
DummyGuide_1334	1	0.91149	0.91192	0.999981	1869	0	0.40862	0.088513	0.088477	0.417286	707	1	0.40862
ITIH2	12	0.91169	0.96689	0.999981	1870	2	0.21496	0.099847	0.3068	0.700851	763	6	0.21496
DummyGuide_1829	1	0.91237	0.91286	0.999981	1871	0	0.52368	0.087629	0.087713	0.414514	702	1	0.52368
DummyGuide_1707	1	0.91243	0.9129	0.999981	1872	0	0.45563	0.08757	0.087624	0.414514	701	1	0.45563
DummyGuide_1962	1	0.91337	0.91389	0.999981	1873	0	0.41512	0.086627	0.08667	0.412914	700	1	0.41512
PTPRM	12	0.91361	0.96727	0.999981	1874	2	0.23321	0.027558	0.11835	0.46033	334	8	0.23321
ICAM2	12	0.91458	0.96757	0.999981	1875	2	0.13834	0.21745	0.50004	0.887958	1151	6	0.13834
DummyGuide_1258	1	0.91461	0.91514	0.999981	1876	0	0.40884	0.08539	0.085584	0.409406	693	1	0.40884
DummyGuide_1985	1	0.91502	0.91552	0.999981	1877	0	0.48441	0.084978	0.085191	0.40836	692	1	0.48441
DummyGuide_1487	1	0.91514	0.91564	0.999981	1878	0	0.38582	0.08486	0.085107	0.40836	691	1	0.38582
DummyGuide_1503	1	0.91538	0.91583	0.999981	1879	0	0.41441	0.084624	0.084891	0.40836	690	1	0.41441
DummyGuide_1952	1	0.91579	0.9162	0.999981	1880	0	0.43039	0.084212	0.084536	0.407907	688	1	0.43039
DummyGuide_1095	1	0.91614	0.91661	0.999981	1881	0	0.35796	0.083859	0.084156	0.407567	686	1	0.35796
DummyGuide_1397	1	0.91649	0.91698	0.999981	1882	0	0.4082	0.083505	0.083801	0.406689	683	1	0.4082
PLVAP	12	0.9167	0.96814	0.999981	1883	2	0.060744	0.61128	0.84141	0.999998	1775	4	0.060744
DummyGuide_1239	1	0.91679	0.91731	0.999981	1884	0	0.43289	0.083211	0.083514	0.406136	681	1	0.43289
DummyGuide_1938	1	0.91697	0.91754	0.999981	1885	0	0.39615	0.083034	0.083324	0.406054	680	1	0.39615
DummyGuide_1033	1	0.91714	0.91777	0.999981	1886	0	0.37864	0.082857	0.083155	0.406054	677	1	0.37864
DummyGuide_1830	1	0.9175	0.91805	0.999981	1887	0	0.42444	0.082504	0.082817	0.406054	674	1	0.42444
DummyGuide_1927	1	0.91756	0.91812	0.999981	1888	0	0.46161	0.082445	0.082745	0.406054	673	1	0.46161
DummyGuide_1605	1	0.91809	0.91856	0.999981	1889	0	0.43659	0.081915	0.082256	0.405909	671	1	0.43659
DummyGuide_1049	1	0.9182	0.91868	0.999981	1890	0	0.46299	0.081797	0.082137	0.405909	670	1	0.46299
DummyGuide_1501	1	0.91832	0.91882	0.999981	1891	0	0.4303	0.081679	0.082019	0.405909	669	1	0.4303
DummyGuide_1474	1	0.9185	0.91902	0.999981	1892	0	0.48199	0.081502	0.081829	0.405909	667	1	0.48199
DummyGuide_1649	1	0.91862	0.91911	0.999981	1893	0	0.41949	0.081384	0.081681	0.405909	666	1	0.41949
LRRC8A	12	0.91904	0.96873	0.999981	1894	2	0.20223	0.055322	0.20062	0.579129	525	7	0.20223
HSPA13	12	0.91911	0.96874	0.999981	1895	2	0.16082	0.18804	0.45678	0.854808	1070	6	0.16082
DummyGuide_1611	1	0.91915	0.91961	0.999981	1896	0	0.4067	0.080854	0.081136	0.405508	664	1	0.4067
COL3A1	12	0.91917	0.96877	0.999981	1897	2	0.17903	0.12222	0.35274	0.753021	866	6	0.17903
DummyGuide_1017	1	0.91956	0.92004	0.999981	1898	0	0.41003	0.080442	0.080722	0.404301	663	1	0.41003
DummyGuide_1026	1	0.91979	0.92027	0.999981	1899	0	0.422	0.080206	0.080498	0.404043	662	1	0.422
CD163	12	0.92081	0.9693	0.999981	1900	1	0.23479	0.011333	0.057866	0.351395	177	8	0.23479
APOH	12	0.92117	0.96941	0.999981	1901	2	0.16765	0.097018	0.30027	0.694632	743	6	0.16765
DummyGuide_1300	1	0.92186	0.92229	0.999981	1902	0	0.48452	0.078144	0.078399	0.396498	657	1	0.48452
DummyGuide_1120	1	0.92209	0.92253	0.999981	1903	0	0.46486	0.077909	0.078116	0.396329	655	1	0.46486
DummyGuide_1038	1	0.92221	0.92262	0.999981	1904	0	0.44164	0.077791	0.078023	0.396329	654	1	0.44164
DummyGuide_1694	1	0.92239	0.92279	0.999981	1905	0	0.51126	0.077614	0.077867	0.396329	652	1	0.51126
DummyGuide_1229	1	0.92356	0.92406	0.999981	1906	0	0.41244	0.076436	0.076562	0.392692	647	1	0.41244
TSPAN4	12	0.92386	0.97017	0.999981	1907	1	0.11399	0.25372	0.55066	0.920654	1248	5	0.11399
DummyGuide_1809	1	0.92398	0.92452	0.999981	1908	0	0.45098	0.076024	0.076156	0.391469	644	1	0.45098
DummyGuide_1496	1	0.92468	0.92517	0.999981	1909	0	0.46545	0.075317	0.075375	0.389159	640	1	0.46545
DummyGuide_1726	1	0.92521	0.92569	0.999981	1910	0	0.45487	0.074786	0.074893	0.388384	639	1	0.45487
DummyGuide_1555	1	0.92533	0.92579	0.999981	1911	0	0.45245	0.074669	0.074771	0.388384	638	1	0.45245
GPR39	12	0.92628	0.97101	0.999981	1912	2	0.14919	0.016022	0.076143	0.391469	230	6	0.14919
DummyGuide_1472	1	0.92633	0.92675	0.999981	1913	0	0.49067	0.073667	0.073799	0.386128	636	1	0.49067
DummyGuide_1286	1	0.92645	0.92682	0.999981	1914	0	0.49697	0.073549	0.073689	0.386128	635	1	0.49697
DummyGuide_1283	1	0.92651	0.92686	0.999981	1915	0	0.45841	0.07349	0.073626	0.386128	633	1	0.45841
DummyGuide_1668	1	0.92657	0.92692	0.999981	1916	0	0.4534	0.073432	0.073546	0.386128	632	1	0.4534
DummyGuide_1456	1	0.92692	0.92727	0.999981	1917	0	0.46595	0.073078	0.073191	0.386128	628	1	0.46595
DummyGuide_1512	1	0.92775	0.92797	0.999981	1918	0	0.45859	0.072253	0.072401	0.385589	623	1	0.45859
DummyGuide_1225	1	0.92786	0.92808	0.999981	1919	0	0.45576	0.072135	0.072249	0.385589	622	1	0.45576
FBLN2	12	0.92821	0.97157	0.999981	1920	1	0.1367	0.094412	0.29417	0.687477	735	6	0.1367
DummyGuide_1121	1	0.92828	0.92846	0.999981	1921	0	0.53501	0.071723	0.071831	0.384409	618	1	0.53501
DummyGuide_1204	1	0.92881	0.9289	0.999981	1922	0	0.44411	0.071193	0.071265	0.382253	616	1	0.44411
EGFR	12	0.92922	0.97185	0.999981	1923	1	0.19455	0.066942	0.22981	0.620597	601	6	0.19455
ITM2B	12	0.92941	0.97189	0.999981	1924	2	0.31202	0.00872	0.046812	0.318826	150	8	0.31202
PRF1	12	0.92956	0.97193	0.999981	1925	2	0.078078	0.23642	0.52672	0.905817	1201	4	0.078078
DummyGuide_1894	1	0.92963	0.92979	0.999981	1926	0	0.44546	0.070368	0.07042	0.378588	614	1	0.44546
DummyGuide_1597	1	0.92969	0.92982	0.999981	1927	0	0.43724	0.070309	0.070365	0.378588	613	1	0.43724
DummyGuide_1023	1	0.92975	0.92988	0.999981	1928	0	0.42281	0.07025	0.070319	0.378588	612	1	0.42281
DummyGuide_1859	1	0.93087	0.93097	0.999981	1929	0	0.43471	0.069131	0.069119	0.375905	609	1	0.43471
DummyGuide_1444	1	0.93128	0.93139	0.999981	1930	0	0.47071	0.068719	0.068739	0.374706	607	1	0.47071
DummyGuide_1604	1	0.93158	0.9317	0.999981	1931	0	0.52936	0.068424	0.068435	0.373918	604	1	0.52936
DummyGuide_1118	1	0.93193	0.93206	0.999981	1932	0	0.43297	0.068071	0.068067	0.372779	603	1	0.43297
FLT4	12	0.93222	0.97283	0.999981	1933	1	0.05485	0.064131	0.22289	0.606795	591	4	0.05485
DummyGuide_1863	1	0.93311	0.93323	0.999981	1934	0	0.4393	0.066892	0.067028	0.367948	600	1	0.4393
VSTM1	12	0.93357	0.9732	0.999981	1935	2	0.351	0.0031314	0.01912	0.232776	70	8	0.351
DummyGuide_1506	1	0.93411	0.93421	0.999981	1936	0	0.4507	0.065891	0.065976	0.363879	599	1	0.4507
DummyGuide_1320	1	0.93434	0.93437	0.999981	1937	0	0.48627	0.065655	0.065706	0.363313	598	1	0.48627
DummyGuide_1270	1	0.9344	0.93442	0.999981	1938	0	0.41421	0.065596	0.065651	0.363313	597	1	0.41421
DummyGuide_1908	1	0.93505	0.93507	0.999981	1939	0	0.4892	0.064948	0.065013	0.361974	593	1	0.4892
PVR	12	0.9351	0.97373	0.999981	1940	2	0.17481	0.13166	0.36835	0.770224	897	6	0.17481
DummyGuide_1037	1	0.93641	0.93641	0.999981	1941	0	0.50455	0.063594	0.063543	0.356282	588	1	0.50455
DummyGuide_1220	1	0.93658	0.93655	0.999981	1942	0	0.43343	0.063417	0.063345	0.356282	585	1	0.43343
DummyGuide_1273	1	0.93664	0.93661	0.999981	1943	0	0.52119	0.063358	0.063265	0.356282	584	1	0.52119
DummyGuide_1775	1	0.9367	0.93666	0.999981	1944	0	0.54565	0.063299	0.063189	0.356282	583	1	0.54565
DummyGuide_1124	1	0.93705	0.93704	0.999981	1945	0	0.47017	0.062946	0.062859	0.356282	581	1	0.47017
DummyGuide_1252	1	0.93723	0.93727	0.999981	1946	0	0.42091	0.062769	0.062707	0.356282	580	1	0.42091
DummyGuide_1507	1	0.93729	0.93731	0.999981	1947	0	0.51599	0.06271	0.062648	0.356282	579	1	0.51599
DummyGuide_1311	1	0.93735	0.93738	0.999981	1948	0	0.42338	0.062651	0.062593	0.356282	578	1	0.42338
CDH13	12	0.93742	0.97446	0.999981	1949	1	0.29608	0.0068041	0.037498	0.29828	122	8	0.29608
DummyGuide_1021	1	0.93776	0.93777	0.999981	1950	0	0.47022	0.062239	0.062192	0.356282	576	1	0.47022
CCDC126	12	0.93794	0.97463	0.999981	1951	2	0.14185	0.38274	0.67985	0.998769	1467	5	0.14185
DummyGuide_1355	1	0.93811	0.93812	0.999981	1952	0	0.53969	0.061885	0.061833	0.355234	574	1	0.53969
DummyGuide_1623	1	0.93835	0.93835	0.999981	1953	0	0.49945	0.061649	0.061647	0.355037	573	1	0.49945
DummyGuide_1915	1	0.93853	0.93855	0.999981	1954	0	0.63032	0.061473	0.06149	0.355009	572	1	0.63032
DummyGuide_1182	1	0.93865	0.93867	0.999981	1955	0	0.47646	0.061355	0.061364	0.355009	571	1	0.47646
DummyGuide_1891	1	0.9387	0.93874	0.999981	1956	0	0.47216	0.061296	0.061305	0.355009	570	1	0.47216
DummyGuide_1857	1	0.93876	0.9388	0.999981	1957	0	0.4803	0.061237	0.061267	0.355009	569	1	0.4803
DummyGuide_1420	1	0.93918	0.93918	0.999981	1958	0	0.47156	0.060825	0.060853	0.354822	566	1	0.47156
DummyGuide_1356	1	0.93923	0.93923	0.999981	1959	0	0.46346	0.060766	0.060815	0.354822	563	1	0.46346
DummyGuide_1029	1	0.93929	0.93931	0.999981	1960	0	0.48045	0.060707	0.060781	0.354822	562	1	0.48045
DummyGuide_1310	1	0.93947	0.93949	0.999981	1961	0	0.53686	0.06053	0.060599	0.354822	561	1	0.53686
DummyGuide_1754	1	0.93953	0.93956	0.999981	1962	0	0.4882	0.060471	0.060557	0.354822	560	1	0.4882
DummyGuide_1166	1	0.93971	0.93973	0.999981	1963	0	0.52632	0.060295	0.060401	0.354822	559	1	0.52632
DummyGuide_1839	1	0.93976	0.93981	0.999981	1964	0	0.43413	0.060236	0.06032	0.354822	558	1	0.43413
DummyGuide_1453	1	0.93994	0.93995	0.999981	1965	0	0.5769	0.060059	0.060118	0.354822	557	1	0.5769
DummyGuide_1278	1	0.94012	0.94014	0.999981	1966	0	0.5368	0.059882	0.059902	0.354822	556	1	0.5368
DummyGuide_1035	1	0.94059	0.9406	0.999981	1967	0	0.41505	0.059411	0.059433	0.354822	554	1	0.41505
DummyGuide_1481	1	0.94065	0.94065	0.999981	1968	0	0.42128	0.059352	0.05937	0.354822	553	1	0.42128
DummyGuide_1256	1	0.94082	0.94082	0.999981	1969	0	0.47893	0.059175	0.059133	0.354822	550	1	0.47893
DummyGuide_1853	1	0.94141	0.9415	0.999981	1970	0	0.62215	0.058586	0.058567	0.35382	547	1	0.62215
DummyGuide_1776	1	0.94194	0.9421	0.999981	1971	0	0.4704	0.058056	0.058039	0.351536	544	1	0.4704
DummyGuide_1774	1	0.9423	0.94245	0.999981	1972	0	0.48545	0.057703	0.057651	0.350997	543	1	0.48545
DummyGuide_1432	1	0.94236	0.94249	0.999981	1973	0	0.43916	0.057644	0.057583	0.350997	542	1	0.43916
APCDD1	12	0.94236	0.97605	0.999981	1974	1	0.028919	0.022476	0.10043	0.435251	287	4	0.028919
TSPAN8	12	0.94251	0.97609	0.999981	1975	2	0.22765	0.025622	0.11153	0.456903	311	8	0.22765
IGSF1	12	0.94262	0.97616	0.999981	1976	1	0.27006	0.026328	0.11406	0.458919	314	8	0.27006
DummyGuide_1152	1	0.94295	0.943	0.999981	1977	0	0.41955	0.057054	0.057068	0.349288	538	1	0.41955
CHL1	12	0.94297	0.97629	0.999981	1978	2	0.12829	0.45591	0.74473	0.999998	1568	4	0.12829
CDH8	12	0.9433	0.97643	0.999981	1979	2	0.051801	0.56	0.81269	0.999998	1711	4	0.051801
DummyGuide_1834	1	0.94348	0.94346	0.999981	1980	0	0.51292	0.056524	0.056485	0.347509	534	1	0.51292
DummyGuide_1202	1	0.94359	0.94356	0.999981	1981	0	0.46183	0.056406	0.056405	0.347509	531	1	0.46183
DummyGuide_1319	1	0.94383	0.94376	0.999981	1982	0	0.46336	0.056171	0.056147	0.347509	529	1	0.46336
DummyGuide_1074	1	0.94389	0.94384	0.999981	1983	0	0.44863	0.056112	0.056071	0.347509	528	1	0.44863
DummyGuide_1482	1	0.94395	0.94393	0.999981	1984	0	0.46035	0.056053	0.056012	0.347509	527	1	0.46035
BMP1	12	0.94464	0.97685	0.999981	1985	2	0.17398	0.097671	0.30177	0.694835	751	7	0.17398
STS	12	0.94465	0.97685	0.999981	1986	2	0.25051	0.051218	0.19011	0.564087	498	7	0.25051
BTN2A1	12	0.94479	0.97691	0.999981	1987	2	0.078352	0.31733	0.61854	0.965465	1364	4	0.078352
DummyGuide_1575	1	0.94489	0.9449	0.999981	1988	0	0.46373	0.05511	0.055104	0.345357	521	1	0.46373
PCDH20	12	0.94506	0.977	0.999981	1989	2	0.23422	0.058712	0.20899	0.585976	548	7	0.23422
DummyGuide_1528	1	0.94524	0.9453	0.999981	1990	0	0.49295	0.054757	0.054745	0.344026	519	1	0.49295
DummyGuide_1261	1	0.94542	0.94547	0.999981	1991	0	0.41634	0.05458	0.054534	0.34362	518	1	0.41634
DummyGuide_1922	1	0.94548	0.94554	0.999981	1992	0	0.48179	0.054521	0.054479	0.34362	517	1	0.48179
DummyGuide_1986	1	0.9456	0.94563	0.999981	1993	0	0.55344	0.054404	0.054352	0.34362	516	1	0.55344
DummyGuide_1715	1	0.94601	0.94605	0.999981	1994	0	0.6314	0.053991	0.05401	0.343087	514	1	0.6314
DummyGuide_1097	1	0.94607	0.94612	0.999981	1995	0	0.54449	0.053932	0.053963	0.343087	513	1	0.54449
DummyGuide_1117	1	0.9463	0.94635	0.999981	1996	0	0.49993	0.053697	0.053744	0.343087	512	1	0.49993
DummyGuide_1247	1	0.94666	0.94669	0.999981	1997	0	0.45612	0.053343	0.053359	0.341733	509	1	0.45612
DummyGuide_1317	1	0.94683	0.94688	0.999981	1998	0	0.43525	0.053166	0.053182	0.34153	508	1	0.43525
DummyGuide_1603	1	0.94695	0.947	0.999981	1999	0	0.45742	0.053049	0.053043	0.34153	507	1	0.45742
[truncated: 345 more rows]
