# Supplementary material for: Surfaceome CRISPR screen identifies OLFML3 as a rhinovirus-inducible IFN antagonist
Source: Genome Biol. 2021 Oct 22;22:297. doi: 10.1186/s13059-021-02513-w (PMC8532573; doi:10.1186/s13059-021-02513-w)
Supplement: Supplementary file 7 — Additional file 7. MAGeCK analysis of genome-wide screen after RV challenge. [file 13059_2021_2513_MOESM7_ESM.xlsx]

## Sheet: Genome RV vs mock
id	num	pos|score	pos|p-value	pos|fdr	pos|rank	pos|goodsgrna	pos|lfc
DIEXF	4	2.5061e-11	2.6397e-07	0.000177	1	4	3.191
UTP23	4	4.9994e-11	2.6397e-07	0.000177	2	4	3.5234
WDR7	4	8.5397e-11	2.6397e-07	0.000177	3	4	4.4241
ICAM1	4	1.6685e-10	2.6397e-07	0.000177	4	4	4.6201
ATP6AP2	4	3.2639e-10	2.6397e-07	0.000177	5	4	4.4435
ATP6V0C	4	4.3361e-10	2.6397e-07	0.000177	6	4	4.2972
DHX33	4	4.8205e-10	2.6397e-07	0.000177	7	4	3.7357
ATP6V1H	4	5.405e-10	2.6397e-07	0.000177	8	4	4.0275
TMEM199	4	9.2532e-10	2.6397e-07	0.000177	9	4	4.0804
EXOSC10	4	1.0905e-09	2.6397e-07	0.000177	10	4	2.2837
ATP6V0E1	4	1.6348e-09	2.6397e-07	0.000177	11	4	3.549
ASH2L	4	1.7643e-09	2.6397e-07	0.000177	12	4	2.1592
CSDE1	4	2.0797e-09	2.6397e-07	0.000177	13	4	5.1041
ITPK1	4	2.5508e-09	2.6397e-07	0.000177	14	4	4.6497
DDX21	4	2.8779e-09	2.6397e-07	0.000177	15	4	2.9098
SETD3	4	3.3764e-09	2.6397e-07	0.000177	16	4	4.38
DNMT1	4	3.8327e-09	2.6397e-07	0.000177	17	4	3.2924
DDX49	4	5.8321e-09	2.6397e-07	0.000177	18	4	3.4877
ATP6V1B2	4	5.9787e-09	2.6397e-07	0.000177	19	4	4.145
TAF1B	4	9.9046e-09	2.6397e-07	0.000177	20	4	2.8571
DNTTIP2	4	1.6047e-08	2.6397e-07	0.000177	21	4	2.0617
EGLN1	4	1.6918e-08	2.6397e-07	0.000177	22	4	1.8253
NOC4L	4	2.3937e-08	2.6397e-07	0.000177	23	4	1.8666
ATP6V1C1	4	4.9113e-08	2.6397e-07	0.000177	24	4	3.2597
ATP6V1D	4	5.0932e-08	2.6397e-07	0.000177	25	4	3.9167
MTOR	4	5.8104e-08	2.6397e-07	0.000177	26	4	2.842
ATP6V1F	4	8.2175e-08	2.6397e-07	0.000177	27	4	4.7445
ATP6V1A	4	9.4042e-08	2.6397e-07	0.000177	28	4	3.6724
RCL1	4	1.1452e-07	5.2794e-07	0.000341	29	4	2.8684
PPM1J	4	1.3017e-07	7.9191e-07	0.00045	30	4	1.2938
DDX52	4	1.7745e-07	7.9191e-07	0.00045	31	4	3.0968
IPMK	4	1.7911e-07	7.9191e-07	0.00045	32	4	3.882
VPS45	4	1.8786e-07	7.9191e-07	0.00045	33	4	2.0588
TBL3	4	2.2149e-07	1.3199e-06	0.000669	34	4	3.4327
RAP1A	4	2.7165e-07	1.3199e-06	0.000669	35	4	1.3475
SPATA5L1	4	2.835e-07	1.3199e-06	0.000669	36	4	2.502
ATP6V0D1	4	2.9641e-07	1.3199e-06	0.000669	37	4	4.1335
ATP6V1E1	4	3.1335e-07	1.8478e-06	0.000889	38	4	3.3875
DDX56	4	3.243e-07	1.8478e-06	0.000889	39	4	1.2565
ATP6V0B	4	4.083e-07	2.3757e-06	0.00099	40	4	4.2391
BUD23	4	4.9332e-07	2.3757e-06	0.00099	41	4	3.0622
EMC3	4	5.0148e-07	2.3757e-06	0.00099	42	4	2.0953
SLC16A1	4	5.3295e-07	2.3757e-06	0.00099	43	4	1.4628
NOL9	4	5.4594e-07	2.3757e-06	0.00099	44	4	2.8898
NOM1	4	5.4797e-07	2.3757e-06	0.00099	45	4	2.6612
WDR77	4	7.1374e-07	2.9037e-06	0.001089	46	3	1.7716
POP1	4	7.7745e-07	2.9037e-06	0.001089	47	4	2.7851
RPS19BP1	4	8.3907e-07	2.9037e-06	0.001089	48	3	2.2679
EIF3I	4	8.4863e-07	2.9037e-06	0.001089	49	4	2.371
SPATA5	4	9.0953e-07	2.9037e-06	0.001089	50	4	2.2157
AMPD1	4	9.42e-07	3.4316e-06	0.001262	51	4	1.5733
EPS8L3	4	1.3315e-06	4.4875e-06	0.001588	52	4	1.7249
CSF1	4	1.3508e-06	4.4875e-06	0.001588	53	4	1.8119
NOL6	4	1.3557e-06	5.0154e-06	0.00165	54	4	2.588
PCBP2	4	1.398e-06	5.0154e-06	0.00165	55	4	3.0635
RPTOR	4	1.4144e-06	5.0154e-06	0.00165	56	4	2.3034
ZNHIT6	4	1.5035e-06	5.0154e-06	0.00165	57	4	1.9934
ACBD3	4	1.7537e-06	6.0713e-06	0.001867	58	4	1.8892
AMPD2	4	1.7827e-06	6.0713e-06	0.001867	59	4	1.6103
CUL2	4	1.8719e-06	6.0713e-06	0.001867	60	4	1.5604
RRP9	4	1.8857e-06	6.0713e-06	0.001867	61	4	3.2395
UTP15	4	2.3824e-06	7.6551e-06	0.002316	62	4	2.2894
IMP4	4	2.4474e-06	8.1831e-06	0.002325	63	4	2.6067
GBP3	4	2.5069e-06	8.1831e-06	0.002325	64	4	1.5429
POLR1A	4	2.5137e-06	8.1831e-06	0.002325	65	4	2.5756
RPP40	4	2.5172e-06	8.1831e-06	0.002325	66	4	2.0865
WDR18	4	2.6361e-06	8.711e-06	0.002438	67	4	2.6087
BCL10	4	3.3376e-06	1.2407e-05	0.003324	68	4	1.6019
ARHGAP29	4	3.4496e-06	1.2407e-05	0.003324	69	4	1.503
PRDX1	4	3.5285e-06	1.2407e-05	0.003324	70	4	3.6506
SLC4A7	4	3.6405e-06	1.2935e-05	0.003369	71	4	1.8172
RPS11	4	3.6751e-06	1.2935e-05	0.003369	72	4	2.2689
PI4KB	4	3.7993e-06	1.3462e-05	0.003459	73	4	3.5324
FUBP1	4	3.8536e-06	1.399e-05	0.003498	74	4	1.4805
AHCYL1	4	3.9423e-06	1.399e-05	0.003498	75	4	1.6437
ABT1	4	4.2821e-06	1.5574e-05	0.003843	76	4	2.6873
DNM2	4	4.5677e-06	1.7158e-05	0.004179	77	4	2.1491
NGDN	4	5.4331e-06	1.9798e-05	0.00476	78	4	2.5322
DDX10	4	5.8221e-06	2.1382e-05	0.005076	79	4	2.5539
EMC7	4	6.2033e-06	2.2965e-05	0.005384	80	3	3.0824
IPPK	4	6.7398e-06	2.6133e-05	0.006051	81	4	1.8746
EIF4G1	4	7.2002e-06	2.7717e-05	0.006263	82	4	1.4204
TSR1	4	7.2579e-06	2.7717e-05	0.006263	83	4	3.2265
PNO1	4	8.0688e-06	3.194e-05	0.007131	84	4	1.9114
USP33	4	8.3721e-06	3.2996e-05	0.00728	85	4	1.3472
PDCD11	4	8.722e-06	3.3524e-05	0.007311	86	4	2.6152
AATF	4	8.8625e-06	3.4052e-05	0.00734	87	4	2.4761
ARPC4	4	9.0496e-06	3.458e-05	0.007344	88	4	2.0672
STRIP1	4	9.3863e-06	3.5636e-05	0.007344	89	4	1.9874
RPS21	4	9.4048e-06	3.5636e-05	0.007344	90	4	1.4068
NUDC	4	9.4814e-06	3.5636e-05	0.007344	91	4	2.9531
ATP6V1G1	4	9.5628e-06	3.6164e-05	0.007372	92	4	3.4851
RPS6	4	9.7993e-06	3.6692e-05	0.007399	93	3	1.9142
WDR3	4	1.089e-05	4.0387e-05	0.008058	94	4	4.1506
SPOUT1	4	1.1118e-05	4.0915e-05	0.008077	95	4	1.5171
NGF	4	1.2487e-05	5.0946e-05	0.00995	96	4	1.8462
SIKE1	4	1.2752e-05	5.1474e-05	0.00995	97	4	1.9553
WDR12	4	1.2974e-05	5.2002e-05	0.00995	98	4	1.5363
SSU72	4	1.3463e-05	5.3058e-05	0.00995	99	4	2.3657
YKT6	4	1.3475e-05	5.3058e-05	0.00995	100	4	3.4359
MRPL38	4	1.4444e-05	5.517e-05	0.010244	101	4	1.2267
GNB2	4	1.6201e-05	6.3617e-05	0.011631	102	4	1.4368
BYSL	4	1.6317e-05	6.3881e-05	0.011631	103	3	2.5106
CYB561D1	4	1.6551e-05	6.5729e-05	0.011722	104	4	1.5182
EMG1	4	1.6608e-05	6.5729e-05	0.011722	105	4	2.5849
UTP3	4	1.6818e-05	6.6256e-05	0.011722	106	4	2.2349
RNASEK	4	1.6987e-05	6.7312e-05	0.011798	107	4	2.7221
POP4	4	1.7443e-05	6.9952e-05	0.012147	108	4	2.1255
DDX47	4	1.7851e-05	7.1536e-05	0.012265	109	3	2.0968
RAB5C	4	1.8204e-05	7.2592e-05	0.012265	110	4	1.631
BMS1	4	1.8221e-05	7.2592e-05	0.012265	111	4	1.6659
NOP9	4	1.8788e-05	7.3648e-05	0.012332	112	3	1.3395
NOP10	4	1.9477e-05	7.5231e-05	0.012463	113	4	1.998
SNX13	4	1.9545e-05	7.5759e-05	0.012463	114	4	1.344
RPP30	4	1.9851e-05	7.8399e-05	0.012785	115	3	2.3563
TRIM33	4	2.0566e-05	8.1567e-05	0.013187	116	4	1.518
GPSM2	4	2.0974e-05	8.4206e-05	0.013437	117	4	1.4029
DLST	4	2.1003e-05	8.4734e-05	0.013437	118	4	1.5177
NOP16	4	2.1248e-05	8.5262e-05	0.013437	119	4	2.3799
PDCD2	4	2.2214e-05	9.0014e-05	0.014068	120	4	3.3291
RPP14	4	2.2873e-05	9.1598e-05	0.014197	121	4	1.4581
KRI1	4	2.3175e-05	9.3181e-05	0.014324	122	3	2.8301
SPAG17	4	2.3731e-05	9.5821e-05	0.01461	123	4	1.3358
GGPS1	4	2.414e-05	9.6877e-05	0.014652	124	4	2.9435
GSTM5	4	2.4803e-05	9.8461e-05	0.014772	125	4	1.2051
NRAS	4	2.6953e-05	0.00010585	0.015755	126	4	1.1874
HFM1	4	2.7838e-05	0.00010955	0.016177	127	4	1.2957
PLPPR5	4	2.8731e-05	0.00011166	0.016233	128	4	1.4766
NAT10	4	2.8866e-05	0.00011166	0.016233	129	4	2.0089
NLE1	4	2.9676e-05	0.00011535	0.016464	130	4	1.4546
LRIF1	4	2.983e-05	0.00011588	0.016464	131	4	1.5272
ZNF697	4	2.9951e-05	0.00011588	0.016464	132	4	1.8716
S1PR1	4	3.0138e-05	0.00011694	0.016489	133	4	0.95845
TGFBRAP1	4	3.1971e-05	0.00012275	0.017179	134	4	1.7946
MED1	4	3.26e-05	0.00012539	0.017363	135	4	1.1703
RPS13	4	3.269e-05	0.00012591	0.017363	136	4	1.5497
EXOSC3	4	3.3766e-05	0.00012908	0.01767	137	4	1.7977
BOP1	4	3.4085e-05	0.0001304	0.017721	138	4	2.1876
MYBPHL	4	3.4397e-05	0.0001333	0.017986	139	4	1.8167
UTP18	4	3.8509e-05	0.00014703	0.019696	140	4	1.583
ESF1	4	3.8743e-05	0.00014862	0.019767	141	4	2.272
NEPRO	4	3.9022e-05	0.0001502	0.019837	142	4	2.2438
IGSF3	4	3.9469e-05	0.00015125	0.019837	143	4	1.3623
RBM19	4	4.0371e-05	0.00015601	0.020246	144	4	1.5242
C1orf162	4	4.0758e-05	0.00015653	0.020246	145	4	1.1511
TBX15	4	4.1092e-05	0.00015812	0.020311	146	4	1.9736
MAB21L3	4	4.1659e-05	0.00016076	0.020438	147	4	1.851
OLFML3	4	4.188e-05	0.00016129	0.020438	148	4	1.4208
UTP20	4	4.2966e-05	0.00016657	0.020965	149	4	1.451
NOP14	4	4.3931e-05	0.00016815	0.021023	150	4	2.5275
EIF3G	4	4.4572e-05	0.00016973	0.021081	151	4	1.6054
DHPS	4	4.4814e-05	0.00017132	0.021137	152	3	2.4189
PROK1	4	4.5955e-05	0.00017448	0.021249	153	4	1.359
C1orf109	4	4.6018e-05	0.00017448	0.021249	154	4	2.3989
RRP12	4	4.8594e-05	0.00018768	0.022708	155	4	2.1667
NVL	4	5.0973e-05	0.00019771	0.023769	156	4	2.0873
UBTF	4	5.1706e-05	0.00020141	0.024059	157	4	1.5218
STRAP	4	5.2933e-05	0.00020695	0.024564	158	4	1.4411
EXOSC9	4	5.4033e-05	0.00021197	0.025002	159	4	1.1172
TSPAN2	4	5.5069e-05	0.00021514	0.025121	160	4	1.5775
ATIC	4	5.5208e-05	0.00021566	0.025121	161	4	1.6505
RSBN1	4	5.5593e-05	0.0002183	0.025272	162	4	1.5275
TRMT13	4	5.619e-05	0.00022042	0.02536	163	4	1.8119
RBM15	4	5.758e-05	0.00022728	0.02599	164	4	1.3496
VMA21	4	5.822e-05	0.00022992	0.026094	165	4	2.2172
UBE3D	4	5.8521e-05	0.00023097	0.026094	166	4	0.73891
MYC	4	5.9694e-05	0.0002352	0.026413	167	4	1.9254
WDR47	4	5.999e-05	0.00023678	0.026432	168	4	1.0699
HIPK1	4	6.0679e-05	0.00023995	0.026529	169	4	1.53
ERICH3	4	6.0773e-05	0.00024048	0.026529	170	4	0.99598
CINP	4	6.2552e-05	0.00025051	0.027314	171	4	1.5813
TGFBR1	4	6.2859e-05	0.00025051	0.027314	172	4	1.1612
FAM212B	4	6.4136e-05	0.00025579	0.027728	173	4	1.3127
ATP6AP1	4	6.7432e-05	0.00026899	0.028992	174	4	3.3762
DR1	4	6.8235e-05	0.00027215	0.029074	175	4	2.3106
PELO	4	6.9068e-05	0.00027453	0.029074	176	4	1.4633
ACTR2	4	6.9789e-05	0.00027585	0.029074	177	3	1.408
RBMXL1	4	7.0114e-05	0.00027638	0.029074	178	4	1.8664
RTCA	4	7.1237e-05	0.00027902	0.029074	179	4	1.3664
C18orf21	4	7.149e-05	0.00028007	0.029074	180	4	2.7535
TSR2	4	7.1702e-05	0.0002806	0.029074	181	4	2.1413
LAS1L	4	7.3089e-05	0.00028694	0.029567	182	4	1.6252
FNDC7	4	7.4323e-05	0.00029221	0.029946	183	4	1.7255
SYPL2	4	7.4664e-05	0.00029485	0.030053	184	4	1.6263
DKC1	4	7.5005e-05	0.00029697	0.030104	185	3	2.7199
TCTEX1D1	4	7.6262e-05	0.00030013	0.030262	186	4	1.4435
GPR61	4	7.7374e-05	0.00030541	0.030519	187	4	1.3036
GARS	4	7.7533e-05	0.00030594	0.030519	188	4	2.2395
NOC2L	4	8.0473e-05	0.00031861	0.031615	189	4	1.9696
GTF3A	4	8.2195e-05	0.00032284	0.031866	190	4	1.5353
C19orf53	4	8.4466e-05	0.0003297	0.032373	191	3	1.359
TM2D1	4	8.5533e-05	0.00033445	0.032668	192	4	1.7667
MFSD14A	4	9.0576e-05	0.00035134	0.03414	193	4	0.90489
GAPVD1	4	9.2152e-05	0.00035715	0.034526	194	4	0.93743
VAV3	4	9.284e-05	0.00035979	0.034527	195	4	1.6564
COL24A1	4	9.318e-05	0.00036085	0.034527	196	4	1.2331
WDR46	4	9.6419e-05	0.0003788	0.036061	197	4	3.0492
PWP2	4	9.9686e-05	0.0003883	0.036779	198	3	1.2158
UTP11	4	0.00010286	0.00039939	0.03745	199	4	2.0549
RPS17	4	0.00010304	0.00039939	0.03745	200	4	1.0021
RABEP1	4	0.00010631	0.00041047	0.038109	201	4	1.1662
LRRC7	4	0.0001064	0.00041047	0.038109	202	3	1.4194
RPS8	4	0.00010712	0.00041417	0.038131	203	3	1.6262
POP5	4	0.00010828	0.00041681	0.038131	204	4	2.0842
CD53	4	0.00010832	0.00041681	0.038131	205	4	1.2844
WDR82	4	0.00010942	0.00041998	0.038145	206	4	1.1843
KIAA1324	4	0.00010959	0.00042103	0.038145	207	4	1.3273
ABCA4	4	0.00011091	0.00042737	0.038533	208	3	1.0646
SDAD1	4	0.00011194	0.00043106	0.03868	209	3	2.151
PELP1	4	0.00011265	0.0004337	0.038732	210	3	2.6769
NUDCD3	4	0.00011403	0.00044004	0.039111	211	3	1.2546
PGP	4	0.00011786	0.00045376	0.040141	212	4	1.1622
GBP5	4	0.00012263	0.00047594	0.041905	213	4	1.0633
AP2M1	4	0.00012344	0.00047858	0.04194	214	3	1.2953
DHX37	4	0.00012743	0.00049626	0.043288	215	4	2.2353
ATP2A2	4	0.00013017	0.00050603	0.043936	216	4	2.867
PEBP4	4	0.00013181	0.00051342	0.044372	217	4	1.6702
NOL10	4	0.00013462	0.00053032	0.045622	218	4	2.4214
TRMT112	4	0.0001375	0.00053982	0.046197	219	3	2.1757
AP2S1	4	0.00013813	0.00054193	0.046197	220	4	2.0473
SHQ1	4	0.00013938	0.0005451	0.046257	221	4	2.023
DIMT1	4	0.0001462	0.00057519	0.048591	222	4	1.7191
GCLM	4	0.00014723	0.00057783	0.048595	223	4	1.1669
DIS3	4	0.0001508	0.00058945	0.04935	224	4	1.0925
ABHD11	4	0.00015244	0.00059367	0.049483	225	4	2.1707
OMA1	4	0.00015462	0.00060053	0.049834	226	4	1.1903
STXBP3	4	0.00015591	0.00060528	0.049874	227	4	1.34
ARPC2	4	0.00015647	0.00060634	0.049874	228	3	1.2709
POLR1C	4	0.00016036	0.00061954	0.050737	229	4	3.0206
MPHOSPH10	4	0.00016455	0.00063168	0.051507	230	4	1.278
DOCK7	4	0.00017214	0.00065491	0.05317	231	4	1.2454
S1PR5	4	0.00017345	0.00066019	0.053367	232	4	1.4021
AGL	4	0.00018316	0.00068975	0.055518	233	3	1.4595
EIF6	4	0.00018746	0.00070137	0.056211	234	4	2.0978
DENND2D	4	0.00019019	0.00071087	0.056544	235	3	1.6493
VHL	4	0.00019041	0.00071193	0.056544	236	4	0.68098
CLCC1	4	0.0001911	0.00071457	0.056544	237	4	1.8086
LRRC8B	4	0.00019911	0.0007436	0.058595	238	4	1.0689
VCAM1	4	0.00020222	0.00075944	0.059592	239	4	1.1479
DLD	4	0.00020315	0.00076314	0.059633	240	4	1.6722
DHX30	4	0.00020641	0.00077528	0.06033	241	4	1.2087
INTS3	4	0.00020886	0.00078426	0.060689	242	4	1.7037
FBL	4	0.00020977	0.00078637	0.060689	243	4	1.9968
PRMT6	4	0.0002119	0.00079534	0.06113	244	4	1.0699
EIF3A	4	0.00021516	0.00080748	0.06139	245	4	1.7545
C1orf146	4	0.00021566	0.00080854	0.06139	246	3	1.2115
MIER1	4	0.00021788	0.0008154	0.061662	247	4	1.7441
PTPN22	4	0.00022375	0.00083599	0.062965	248	3	1.4247
VANGL1	4	0.00022989	0.00085922	0.064455	249	4	1.82
PPAT	4	0.00023342	0.00086873	0.064887	250	4	2.2828
DDX18	4	0.00023443	0.00087189	0.064887	251	3	1.4396
SNX14	4	0.00023687	0.0008777	0.064922	252	3	2.0219
TNNI3K	4	0.00023736	0.00087928	0.064922	253	3	1.1306
COL11A1	4	0.00023882	0.00088404	0.065017	254	4	1.0093
CCDC115	4	0.00023952	0.00088773	0.065033	255	3	3.3323
EXOSC4	4	0.00024047	0.00089248	0.065127	256	4	1.8312
ACADM	4	0.00025327	0.00093894	0.068252	257	4	1.1035
KCNA10	4	0.0002564	0.00095161	0.068906	258	4	1.6304
WDR43	4	0.00026097	0.00096587	0.069669	259	4	2.119
KCNC4	4	0.00026252	0.00097009	0.069705	260	4	1.1221
EXOSC2	4	0.00026703	0.00098751	0.070455	261	4	1.7885
RPF1	4	0.00026749	0.00098804	0.070455	262	4	1.4967
DCAKD	4	0.00027265	0.0010065	0.071381	263	4	0.89033
VPS16	4	0.00027335	0.0010086	0.071381	264	4	1.718
C1orf194	4	0.00027835	0.0010245	0.072229	265	4	1.0039
GLIS1	4	0.00028857	0.0010609	0.07435	266	4	1.1107
TMIGD3	4	0.00028905	0.0010625	0.07435	267	4	1.4287
PFAS	4	0.0002905	0.0010678	0.074441	268	4	2.2087
PLA2G16	4	0.00029357	0.001081	0.074894	269	4	1.279
GNAT2	4	0.000295	0.0010852	0.074894	270	4	1.0485
PGGT1B	4	0.00029549	0.0010862	0.074894	271	4	1.011
PIK3C3	4	0.00030176	0.0011068	0.076035	272	4	1.3951
ATP6V1G2	4	0.0003075	0.0011311	0.077419	273	4	1.105
AMIGO1	4	0.00031448	0.0011549	0.078758	274	3	1.1072
RPS25	4	0.00031992	0.0011733	0.079728	275	2	0.63726
SURF6	4	0.00032514	0.0011908	0.08062	276	4	2.0755
RABGGTB	4	0.00032988	0.0012077	0.081469	277	4	1.9218
ZCCHC9	4	0.00033726	0.0012309	0.082739	278	4	1.5365
OGDH	4	0.00034151	0.0012473	0.08354	279	4	1.4144
RHOC	4	0.00035157	0.0012789	0.085356	280	4	1.7352
RRP1	4	0.00036854	0.0013518	0.089899	281	4	1.4384
RABGEF1	4	0.00037521	0.0013729	0.090981	282	3	1.1283
SARS	4	0.00037739	0.0013803	0.091148	283	3	2.1515
UBE2U	4	0.00037947	0.0013887	0.091384	284	4	0.87315
DCLRE1B	4	0.00038672	0.0014099	0.09245	285	4	1.523
UBL4B	4	0.00039585	0.0014447	0.094404	286	4	1.4623
BRDT	4	0.00040118	0.00146	0.095074	287	3	1.28
TSHB	4	0.00040409	0.0014695	0.095361	288	4	0.94204
RRP36	4	0.00040582	0.0014785	0.095613	289	4	1.4131
ADORA3	4	0.00041008	0.0014959	0.096407	290	4	0.74106
TFRC	4	0.00041314	0.0015107	0.097026	291	3	1.7531
RPS20	2	0.0004132	0.00080696	0.06139	292	2	2.0912
MOV10	4	0.00043855	0.0015957	0.102136	293	4	1.5847
HAO2	4	0.00044475	0.0016234	0.103556	294	3	1.8792
TNPO3	4	0.00045003	0.0016501	0.1049	295	4	1.258
CHIA	4	0.00045514	0.0016691	0.10575	296	4	1.375
PLPPR4	4	0.00045816	0.0016781	0.105961	297	4	1.243
CMPK1	4	0.00047368	0.0017367	0.10906	298	4	1.1689
FNBP1L	4	0.00047446	0.0017388	0.10906	299	4	1.0054
CPD	4	0.00048372	0.0017736	0.110875	300	4	0.74206
EFEMP1	4	0.00049274	0.0018021	0.112282	301	3	1.0209
RAB3B	4	0.00049572	0.0018127	0.112566	302	4	0.73436
FDX1	4	0.00049827	0.0018259	0.113012	303	4	1.2986
CHD8	4	0.00051015	0.001857	0.114562	304	4	1.301
KCNA3	4	0.00051126	0.001866	0.114738	305	4	1.5957
MRPS18B	4	0.00051646	0.001885	0.115528	306	4	1.7127
POLR1B	4	0.00052377	0.001913	0.116337	307	4	2.3243
MRPS11	4	0.00052613	0.0019188	0.116337	308	4	1.0641
DOHH	4	0.00052654	0.0019199	0.116337	309	4	1.3417
FRRS1	4	0.00052778	0.001923	0.116337	310	4	1.3905
DDAH1	4	0.00053606	0.0019536	0.117685	311	4	1.2591
SLC16A4	4	0.00053785	0.0019579	0.117685	312	4	1.1074
GSTM4	4	0.00054228	0.0019721	0.117853	313	4	1.2834
LRIG2	4	0.00054389	0.001979	0.117853	314	4	0.92722
NOC3L	4	0.00054422	0.0019795	0.117853	315	4	1.8163
PRPF38B	4	0.00055712	0.0020302	0.120452	316	4	2.5947
GBP2	4	0.0005587	0.002036	0.120452	317	4	0.83713
TAF1C	4	0.00057343	0.0021004	0.123871	318	4	1.7663
TADA1	4	0.00059088	0.0021543	0.126649	319	4	1.397
GADD45A	4	0.0005989	0.0021838	0.127986	320	3	1.033
REG4	4	0.00060449	0.0022007	0.128574	321	3	1.4627
DDX51	4	0.00060697	0.0022123	0.128851	322	4	2.1617
CTIF	4	0.00061354	0.0022356	0.129551	323	4	1.2296
EXOSC7	4	0.0006153	0.0022419	0.129551	324	4	1.814
ST7L	4	0.00061615	0.0022451	0.129551	325	4	1.4678
RPS4X	4	0.00063315	0.0023042	0.132555	326	3	2.9498
POLG2	4	0.00063516	0.0023121	0.132604	327	3	0.87681
SCPEP1	4	0.00066139	0.0024024	0.137361	328	4	1.0811
PKN2	4	0.00068113	0.0024784	0.141277	329	4	1.9414
DRAM2	4	0.0006872	0.0024969	0.141551	330	3	1.6879
CPSF1	4	0.00068827	0.0025006	0.141551	331	4	1.1757
BARHL2	4	0.00069063	0.0025059	0.141551	332	4	1.4189
CYP2J2	4	0.00069174	0.0025138	0.141572	333	4	0.9684
WRB	4	0.00069853	0.0025365	0.141919	334	3	0.91396
INSL5	4	0.00069952	0.0025391	0.141919	335	3	1.1301
ALX3	4	0.00070248	0.0025486	0.141919	336	4	1.5223
TBCB	4	0.00070272	0.0025502	0.141919	337	4	1.2899
ELOA2	4	0.00070698	0.0025692	0.142554	338	3	0.95366
MLST8	4	0.00071497	0.0026004	0.143856	339	4	1.5955
MAGI3	4	0.00073734	0.0026796	0.147801	340	3	1.299
ABCD3	4	0.00074496	0.002698	0.148384	341	4	0.90956
FH	4	0.00074964	0.0027157	0.148645	342	4	1.1595
FIGNL1	4	0.00075051	0.0027186	0.148645	343	4	1.1201
URB1	4	0.00077041	0.002791	0.151973	344	3	1.5214
PDPK1	4	0.00077224	0.0027957	0.151973	345	4	0.91778
LHX8	4	0.00077489	0.0028068	0.151982	346	3	1.615
DBR1	4	0.00077701	0.0028121	0.151982	347	3	3.8702
LIAS	4	0.00078822	0.0028511	0.15365	348	4	1.3201
ADA2	4	0.0007909	0.0028606	0.153721	349	3	1.0651
ZC3HAV1L	4	0.00079844	0.0028913	0.154791	350	3	1.29
PSRC1	4	0.00080061	0.0028971	0.154791	351	3	1.9527
PRMT5	4	0.00080767	0.0029171	0.15542	352	4	2.4199
OVGP1	4	0.00081949	0.0029536	0.156915	353	4	1.3577
EIF5B	4	0.00082848	0.0029868	0.158234	354	4	1.3532
BZW2	4	0.0008352	0.003014	0.159042	355	3	1.061
HSD3B1	4	0.00083687	0.003019	0.159042	356	3	1.9843
RRP7A	4	0.00084724	0.0030628	0.160898	357	4	2.4143
GDAP2	4	0.00085993	0.0031061	0.162716	358	4	1.0281
TTF2	4	0.00086549	0.0031273	0.163366	359	4	1.5238
MIOS	4	0.00088096	0.0031959	0.166488	360	4	2.03
AP4B1	4	0.0008871	0.0032149	0.167014	361	4	0.94376
IMP3	4	0.00092027	0.0033152	0.171749	362	4	2.0607
AK5	4	0.00092806	0.0033442	0.172776	363	4	1.2424
KRR1	4	0.00095851	0.0034562	0.178068	364	4	2.1552
IFI44L	4	0.00096237	0.0034678	0.178177	365	4	0.96654
PHTF1	4	0.00097792	0.0035195	0.180066	366	4	1.5042
PTPN23	4	0.00097945	0.0035237	0.180066	367	3	1.244
NOTCH2	4	0.00098767	0.0035575	0.181298	368	3	1.0646
ZSCAN20	4	0.00099206	0.0035718	0.181532	369	4	1.6504
DDX24	4	0.0010134	0.0036446	0.184135	370	3	0.9412
NABP1	4	0.0010155	0.003651	0.184135	371	4	0.93309
CD101	4	0.0010173	0.0036589	0.184135	372	4	1.3788
MRPL10	4	0.0010182	0.0036631	0.184135	373	4	1.0192
ATXN7L2	4	0.0010214	0.0036721	0.184135	374	4	1.903
GNL2	4	0.0010245	0.0036853	0.184304	375	4	1.1367
RWDD3	4	0.0010408	0.0037476	0.186921	376	4	1.7106
RPS5	4	0.0010504	0.0037903	0.188552	377	4	2.9761
EXOSC6	4	0.0010694	0.0038611	0.191563	378	4	2.1181
SRM	4	0.0010794	0.0038986	0.192913	379	4	1.4691
CIITA	4	0.0010871	0.0039297	0.193693	380	3	1.0855
APAF1	4	0.0010891	0.003935	0.193693	381	4	0.91885
CARD10	4	0.0010967	0.0039662	0.194715	382	4	0.75456
COX5B	4	0.001104	0.0039894	0.195325	383	4	0.75318
MOB3C	4	0.0011079	0.0039994	0.195325	384	4	0.85168
XYLT2	4	0.0011252	0.0040554	0.197544	385	4	0.50925
UTP4	4	0.0011454	0.0041272	0.200521	386	4	1.3687
CCDC84	4	0.0011579	0.0041747	0.202305	387	4	1.711
RPP38	4	0.0011943	0.0042966	0.207678	388	3	1.6306
ATP5G1	4	0.0012168	0.0043769	0.211005	389	4	1.083
KCND3	4	0.0012199	0.004388	0.211005	390	4	1.2258
AP2B1	4	0.0012284	0.0044186	0.211924	391	4	0.88842
PHOSPHO1	4	0.001232	0.0044297	0.211924	392	3	0.82204
DGKB	4	0.0012356	0.0044429	0.212015	393	3	1.256
GFI1	4	0.0012436	0.0044703	0.212783	394	4	1.0531
CCT6A	4	0.0012548	0.0045025	0.213774	395	4	0.98191
KRT27	4	0.001258	0.0045178	0.213959	396	4	0.67037
GBP7	4	0.001266	0.0045442	0.214667	397	4	1.3915
WDR36	4	0.0012711	0.0045638	0.215048	398	3	1.0533
FAM110D	4	0.0012985	0.0046525	0.218678	399	4	0.59731
RBSN	4	0.0013337	0.0047728	0.223775	400	3	1.4048
RABAC1	4	0.0013481	0.0048214	0.225488	401	4	1.2126
ROR1	4	0.0013534	0.004842	0.225888	402	4	0.79795
SLC20A2	4	0.0013629	0.0048758	0.2269	403	4	0.71602
TNPO1	4	0.001368	0.0048885	0.226926	404	3	0.99928
CYP11A1	4	0.0013769	0.0049196	0.227808	405	4	1.4152
UTP6	4	0.0013897	0.0049645	0.22932	406	3	1.2198
ASNA1	4	0.0014182	0.005068	0.233525	407	4	1.1157
CD58	4	0.0014289	0.0051054	0.234675	408	3	1.6153
SLC35D1	4	0.0014333	0.0051192	0.234731	409	4	1.1566
MRPS18A	4	0.0014381	0.0051398	0.2351	410	4	0.97987
CITED4	4	0.0014527	0.0051815	0.236105	411	4	1.1107
ACTR3	4	0.0014586	0.0052015	0.236105	412	4	0.72604
MUT	4	0.0014604	0.0052094	0.236105	413	4	0.93215
PLCB3	4	0.0014612	0.0052121	0.236105	414	4	0.9877
CDCP2	4	0.0014652	0.0052269	0.236204	415	4	0.93421
MCOLN3	4	0.0014761	0.0052628	0.237255	416	4	1.0165
SNX7	4	0.0014833	0.0052865	0.237375	417	4	1.3537
MRPL21	4	0.0014845	0.0052908	0.237375	418	4	1.0174
CELSR2	4	0.0014882	0.0053034	0.237376	419	3	1.4635
ARHGEF7	4	0.0015063	0.0053684	0.23971	420	3	0.95456
CHTOP	4	0.0015223	0.005437	0.242198	421	4	0.64071
LEXM	4	0.0015375	0.005485	0.243759	422	3	1.3767
NOL8	4	0.0015424	0.0054993	0.243815	423	4	1.1085
MICAL2	4	0.001557	0.0055489	0.244881	424	4	1.0833
PRKAA2	4	0.0015574	0.0055494	0.244881	425	4	0.97621
CLCA4	4	0.0015667	0.0055806	0.245677	426	3	1.5296
SPOP	4	0.0015884	0.0056656	0.248277	427	3	0.90606
RARS2	4	0.0015886	0.0056661	0.248277	428	4	0.83518
PGM1	4	0.0015944	0.0056872	0.248621	429	4	0.64658
CALR3	4	0.0015983	0.0057025	0.248711	430	4	0.84245
IL23R	4	0.0016158	0.0057675	0.250959	431	4	1.2396
RBMX2	4	0.0016271	0.0058102	0.252235	432	3	1.4648
OTUD7A	4	0.0016307	0.0058256	0.252315	433	4	1.0276
GPBP1L1	4	0.0016538	0.0059011	0.254996	434	4	1.1573
FMO5	4	0.0016592	0.0059164	0.25507	435	4	0.95316
ARMC7	4	0.0016886	0.0060183	0.258868	436	2	0.74614
DISP3	4	0.001693	0.006033	0.25891	437	4	0.48502
ERAL1	4	0.0017183	0.0061159	0.261868	438	3	0.69644
SPG11	4	0.0017347	0.0061782	0.263791	439	4	0.74611
GPR88	4	0.0017379	0.0061919	0.263791	440	4	1.508
EFCAB7	4	0.0017416	0.006203	0.263791	441	4	0.79952
MTRF1L	4	0.0017532	0.0062432	0.264745	442	4	1.2388
CDC14A	4	0.0017561	0.0062537	0.264745	443	3	1.0762
STAG1	4	0.0017738	0.0063165	0.266492	444	4	0.67123
RARA	4	0.0017753	0.0063234	0.266492	445	3	1.1313
BCL2L15	4	0.0017961	0.0063873	0.268581	446	3	1.2994
NHLRC2	4	0.0018035	0.0064047	0.268711	447	4	1.2819
CYB5D2	4	0.0018281	0.006495	0.271704	448	4	1.111
RTBDN	4	0.0018309	0.006505	0.271704	449	4	0.89869
HS2ST1	4	0.0018387	0.0065367	0.27242	450	4	1.5665
SLC44A3	4	0.0018479	0.0065736	0.273353	451	4	1.1539
CABP5	4	0.0018517	0.006589	0.273383	452	4	0.75352
MRPL57	4	0.0018763	0.006675	0.27593	453	4	1.4965
XRCC6	4	0.0018782	0.0066798	0.27593	454	3	1.2402
WSCD2	4	0.0019147	0.0068213	0.281155	455	4	0.95462
RIOK2	4	0.0019321	0.0068799	0.282093	456	3	1.7213
DEFB112	4	0.0019335	0.0068846	0.282093	457	3	0.84386
C15orf52	4	0.0019387	0.0069004	0.282093	458	4	0.74619
FAM19A3	4	0.0019498	0.0069369	0.282093	459	4	1.1566
EIF4A1	4	0.0019513	0.0069443	0.282093	460	4	1.3382
HCCS	4	0.0019608	0.0069712	0.282093	461	3	1.2416
CTTNBP2NL	4	0.001963	0.0069786	0.282093	462	4	1.1949
NAPG	4	0.001964	0.0069833	0.282093	463	4	0.86038
EXOC1	4	0.0019655	0.0069928	0.282093	464	3	0.92216
EVI5L	4	0.0019711	0.0070108	0.282093	465	4	0.95011
TTC4	4	0.0019714	0.0070113	0.282093	466	4	1.2562
EEF1G	4	0.0019752	0.0070245	0.282093	467	3	1.0628
UHRF1	4	0.001986	0.0070667	0.283183	468	3	2.5809
RREB1	4	0.0019919	0.0070889	0.283466	469	4	1.042
LRRC39	4	0.0019982	0.0071085	0.283531	470	4	0.975
CELF6	4	0.0020027	0.0071253	0.283531	471	4	0.78465
CAV2	4	0.0020059	0.0071359	0.283531	472	4	0.77508
PHGDH	4	0.0020106	0.0071602	0.283895	473	4	1.6081
TAF1A	4	0.0020315	0.0072336	0.286199	474	3	1.3256
GSTM2	4	0.002036	0.0072542	0.28641	475	4	1.0513
FOXD3	4	0.0020454	0.007289	0.287181	476	4	0.95143
EMC4	4	0.0020823	0.0074157	0.291054	477	4	1.764
CLNS1A	4	0.0020835	0.0074184	0.291054	478	3	1.5311
MTCH1	4	0.0021423	0.0076454	0.299334	479	4	1.1199
C1orf87	4	0.002157	0.0076992	0.300478	480	4	0.83634
TAAR2	4	0.0021597	0.0077066	0.300478	481	4	0.57867
SMIM6	4	0.0021635	0.007724	0.300532	482	4	0.8431
ABHD15	4	0.0021755	0.0077631	0.301427	483	4	0.89616
FAF1	4	0.0021838	0.0077948	0.302031	484	4	0.64508
BEND6	4	0.0021904	0.0078191	0.302348	485	4	0.77894
AGBL2	4	0.0022025	0.0078592	0.302895	486	4	0.81854
NOP2	4	0.0022043	0.0078655	0.302895	487	4	1.0788
ABCF1	4	0.0022106	0.0078872	0.303106	488	3	0.91291
TIMM13	4	0.0022303	0.00797	0.305469	489	4	0.92389
HENMT1	4	0.0022376	0.0079964	0.305469	490	4	0.88169
KCNAB3	4	0.0022381	0.0079975	0.305469	491	4	0.68586
ZBTB25	4	0.002255	0.0080587	0.306301	492	3	0.73774
KAZN	4	0.0022601	0.0080719	0.306301	493	4	0.79557
USP36	4	0.002262	0.0080825	0.306301	494	4	1.59
RNF8	4	0.0022629	0.0080846	0.306301	495	4	0.72369
KLHL11	4	0.0022775	0.00813	0.307259	496	4	1.2912
ZNF544	4	0.0022817	0.0081427	0.307259	497	3	0.77959
ALYREF	4	0.0022968	0.0081971	0.308508	498	3	1.0406
C17orf107	4	0.0022992	0.0082087	0.308508	499	3	0.92348
SYDE2	4	0.0023262	0.0083074	0.311249	500	4	1.2251
CCDC47	4	0.0023285	0.0083148	0.311249	501	4	0.56529
HSD3B2	4	0.0023413	0.0083528	0.312049	502	3	1.4993
SZRD1	4	0.0023489	0.0083797	0.312432	503	3	1.0788
CNN3	4	0.0023808	0.0084822	0.315624	504	4	1.1692
PTGFRN	4	0.0023896	0.0085149	0.316214	505	4	0.78666
DIDO1	4	0.0023985	0.0085434	0.316646	506	4	1.3186
MRPL44	4	0.0024269	0.00864	0.319595	507	4	0.88981
ATP5F1	4	0.002433	0.0086617	0.319765	508	4	1.1219
TMEM200C	4	0.0024382	0.0086817	0.319876	509	4	0.7521
WDR75	4	0.0024514	0.0087271	0.320296	510	4	2.5191
PAICS	4	0.0024541	0.0087382	0.320296	511	4	1.7829
NTN1	4	0.0024568	0.0087519	0.320296	512	4	0.67257
MRPL27	4	0.0024611	0.0087614	0.320296	513	3	1.3201
CCDC59	4	0.0024849	0.0088401	0.321114	514	3	0.82803
CCT8L2	4	0.0024883	0.0088522	0.321114	515	3	1.3275
GABRA5	4	0.0024888	0.0088549	0.321114	516	4	0.37979
CTNNBIP1	4	0.0024924	0.0088707	0.321114	517	4	0.72166
WFIKKN2	4	0.0024927	0.0088723	0.321114	518	2	0.28102
TP53I13	4	0.0024985	0.0088866	0.321114	519	4	0.61049
LY6E	4	0.0025057	0.008904	0.321125	520	2	0.79447
FOXD2	4	0.0025229	0.008962	0.322599	521	4	0.54978
CAMLG	4	0.0025462	0.0090375	0.324694	522	4	1.1675
PTGER3	4	0.0025555	0.0090671	0.325133	523	4	0.89562
CLCA1	4	0.0025814	0.0091452	0.327289	524	4	1.2434
JAK1	4	0.002586	0.0091621	0.327289	525	4	1.2391
DMRTA2	4	0.0025973	0.0092112	0.328417	526	3	1.069
TFAP2A	4	0.0026091	0.0092566	0.32941	527	4	1.3303
WBSCR28	4	0.0026166	0.0092815	0.329667	528	4	0.4354
ESPL1	4	0.0026361	0.0093416	0.331178	529	1	-0.42898
USP16	4	0.0026508	0.0093876	0.332178	530	4	1.4872
PALMD	4	0.0026648	0.0094277	0.332642	531	3	1.1937
LOXL2	4	0.0026684	0.0094361	0.332642	532	3	1.1391
LMO4	4	0.0026815	0.00948	0.333559	533	3	0.8288
CASQ2	4	0.0026904	0.0095077	0.333908	534	4	0.86899
FAM46C	4	0.0027006	0.0095444	0.33457	535	3	0.59526
MCOLN2	4	0.0027174	0.0096075	0.336108	536	3	1.6102
FADD	4	0.0027214	0.0096241	0.336108	537	4	0.93683
ISG15	4	0.002731	0.009651	0.336294	538	3	0.8708
PIN1	4	0.0027343	0.0096653	0.336294	539	4	1.1481
SLC25A11	4	0.0027597	0.0097534	0.338104	540	4	0.98786
LAMTOR5	4	0.0027625	0.0097629	0.338104	541	4	1.4898
C1orf52	4	0.0027649	0.0097714	0.338104	542	4	1.3474
ISG20L2	4	0.0027717	0.0098004	0.338484	543	4	0.97446
F3	4	0.0027853	0.0098506	0.339453	544	4	0.8338
SPAG7	4	0.0027921	0.0098717	0.339453	545	4	0.76193
ERC1	4	0.0027951	0.0098828	0.339453	546	3	0.77873
RPS19	4	0.0028146	0.0099535	0.340632	547	4	2.2139
NR2E1	4	0.002816	0.0099562	0.340632	548	4	0.7447
ZBTB17	4	0.0028213	0.0099731	0.340632	549	4	0.90007
MSI2	4	0.0028264	0.0099942	0.340632	550	2	0.62363
UTP14A	4	0.0028299	0.010008	0.340632	551	4	1.2371
EIF1AD	4	0.0028532	0.010082	0.342544	552	3	1.6852
FNDC3B	4	0.0028668	0.010135	0.342993	553	4	0.81286
NDUFS7	4	0.0028679	0.010137	0.342993	554	3	1.14
NMD3	4	0.0028713	0.01015	0.342993	555	3	1.1157
DAGLB	4	0.0028917	0.010216	0.344585	556	3	1.3862
CLCN7	4	0.0029061	0.010263	0.345566	557	3	0.92068
ICAM5	4	0.0029193	0.010316	0.346703	558	3	0.79014
FAM171A2	4	0.0029496	0.010425	0.349767	559	4	1.0744
BRCA1	4	0.0029586	0.010458	0.350014	560	3	0.83688
GADD45GIP1	4	0.0029656	0.010477	0.350014	561	4	1.336
MYRF	4	0.0029687	0.010489	0.350014	562	4	0.75722
RIOK1	4	0.0029762	0.010513	0.350184	563	4	1.6178
TMEM266	4	0.0029866	0.01055	0.350252	564	4	0.92953
MAD2L1BP	4	0.0029915	0.01057	0.350252	565	4	0.79895
URGCP	4	0.0029917	0.010571	0.350252	566	3	0.83173
GIPC2	4	0.0030032	0.010613	0.351031	567	3	1.5084
TWNK	4	0.0030186	0.010662	0.352034	568	4	1.2818
GPHB5	4	0.0030349	0.010707	0.352912	569	4	0.52555
TACSTD2	4	0.0030723	0.010824	0.356115	570	4	1.0466
ZNF804B	4	0.0030766	0.010843	0.356115	571	4	0.66116
TSEN34	4	0.0030858	0.010878	0.356652	572	4	0.90997
SLC30A7	4	0.0031333	0.01105	0.361663	573	3	0.87327
ISCA2	4	0.0031686	0.011187	0.364126	574	4	1.0233
SACM1L	4	0.0031802	0.011228	0.364126	575	4	1.3916
A3GALT2	4	0.003181	0.011234	0.364126	576	4	1.2517
FEV	4	0.0031837	0.011244	0.364126	577	3	1.5451
FBN1	4	0.0031846	0.011247	0.364126	578	4	0.60581
CACNG1	4	0.0031877	0.01126	0.364126	579	3	1.0582
LPAR3	4	0.003189	0.011261	0.364126	580	4	1.3216
TNFSF12	4	0.0031957	0.011282	0.364181	581	3	0.80311
SLC35F1	4	0.0032234	0.011371	0.365736	582	4	0.70584
BAK1	4	0.0032265	0.011383	0.365736	583	3	1.4503
SHISA9	4	0.0032332	0.011397	0.365736	584	3	0.8866
NAF1	4	0.0032367	0.011409	0.365736	585	4	1.2905
CSTF1	4	0.0032507	0.01147	0.366446	586	4	1.0868
WNT9B	4	0.0032573	0.011495	0.366631	587	4	0.91976
PEAK1	4	0.0032686	0.011538	0.36737	588	4	0.7655
TNFRSF13B	4	0.0032833	0.011585	0.368151	589	4	0.92315
SLC35A3	4	0.0032915	0.011613	0.368151	590	3	1.1165
RPL3	4	0.0032943	0.011621	0.368151	591	4	1.4384
MAK16	4	0.0033147	0.011685	0.36939	592	3	1.0523
GRK4	4	0.0033217	0.011708	0.36939	593	4	0.91892
PATL2	4	0.0033256	0.011719	0.36939	594	4	0.92503
SEC22B	4	0.0033869	0.011914	0.3749	595	4	1.5201
SNX22	4	0.0034106	0.011999	0.376926	596	4	0.76767
WDR78	4	0.0034213	0.012038	0.377537	597	3	1.212
SMAD7	4	0.003433	0.012077	0.37813	598	4	0.87463
HMX1	4	0.0034547	0.012148	0.379695	599	3	0.77983
DDX20	4	0.0034772	0.012237	0.381864	600	4	1.2975
RIMS3	4	0.0035048	0.012324	0.383372	601	4	0.75387
SYT6	4	0.0035053	0.012327	0.383372	602	4	0.77402
BSND	4	0.0035124	0.012352	0.38354	603	2	0.49937
RAB11FIP4	4	0.0035201	0.012376	0.383627	604	2	0.55468
MIGA1	4	0.0035511	0.01247	0.385674	605	3	0.88198
LEPR	4	0.0035549	0.012483	0.385674	606	4	0.84928
PSPH	4	0.0035613	0.012508	0.385805	607	4	0.79128
EXOSC8	4	0.0035859	0.012586	0.387281	608	4	2.0359
AAMP	4	0.0035956	0.012613	0.387281	609	3	1.8155
ORC3	4	0.0035969	0.012618	0.387281	610	3	0.79208
WDR74	4	0.0036509	0.012812	0.392618	611	4	1.4457
NT5M	4	0.0036647	0.012858	0.393383	612	4	0.58948
DPP8	4	0.0036964	0.012966	0.395806	613	4	0.8906
RBM17	4	0.0037181	0.013042	0.39706	614	3	0.88171
CPT1B	4	0.0037284	0.01307	0.397267	615	3	0.77654
QARS	4	0.0037462	0.013134	0.398563	616	4	2.3904
SGF29	4	0.0037689	0.013207	0.399864	617	3	0.81475
RPRD2	4	0.003772	0.013219	0.399864	618	4	0.51545
EXOSC5	4	0.0037773	0.013242	0.399906	619	4	1.1432
CLTC	4	0.0037911	0.013278	0.400361	620	4	1.397
ADSL	4	0.0037994	0.013308	0.400593	621	4	1.3738
GSTM3	4	0.0038297	0.013406	0.402281	622	3	1.1436
RPLP0	4	0.0038301	0.013407	0.402281	623	3	1.9381
GATS	4	0.0038483	0.013474	0.403655	624	2	0.57787
PODN	4	0.0038698	0.013538	0.404366	625	4	0.80842
SP8	4	0.00388	0.013574	0.404366	626	4	0.73567
TMEM108	4	0.0038843	0.013587	0.404366	627	4	0.71162
PCGF2	4	0.0038961	0.013624	0.404366	628	4	1.2217
PMAIP1	4	0.0038977	0.013627	0.404366	629	3	0.6922
NPC1	4	0.0038978	0.013627	0.404366	630	4	0.98904
KIAA1107	4	0.0039129	0.013671	0.40473	631	4	1.0443
PDCD5	4	0.0039156	0.013682	0.40473	632	4	0.69568
TMEM17	4	0.0039335	0.013742	0.405855	633	4	1.0034
PIF1	4	0.0039528	0.013803	0.406878	634	4	0.75275
NADK2	4	0.0039644	0.013849	0.406878	635	4	0.99302
ROMO1	4	0.0039649	0.013851	0.406878	636	4	1.4289
LCK	4	0.0039678	0.013863	0.406878	637	4	0.6426
DIRAS3	4	0.0040609	0.0142	0.414973	638	4	1.0002
CASP9	4	0.0040671	0.014219	0.414973	639	3	0.7481
POLG	4	0.0040734	0.014242	0.414973	640	3	0.79805
TRNT1	4	0.004075	0.014246	0.414973	641	3	1.5914
XRCC2	4	0.0040765	0.01425	0.414973	642	4	0.78371
CRLF3	4	0.0040873	0.014289	0.415481	643	3	0.77508
B3GNT2	4	0.0041223	0.014408	0.417606	644	4	1.0171
FBXL20	4	0.0041258	0.014422	0.417606	645	4	0.85658
HES7	4	0.0041285	0.014429	0.417606	646	4	0.80307
EXOC3	4	0.0041492	0.014498	0.418719	647	2	0.36062
FPGT	4	0.0041599	0.014528	0.418719	648	3	0.8762
TXNRD1	4	0.0041699	0.014555	0.418719	649	2	0.68717
C1orf131	4	0.0041712	0.014557	0.418719	650	4	1.6168
TBC1D28	4	0.0042169	0.014721	0.422147	651	4	0.71227
NRN1	4	0.0042172	0.014721	0.422147	652	3	0.78026
PNPO	4	0.0042295	0.014761	0.422636	653	4	0.71665
FAM69A	4	0.0042525	0.01484	0.424256	654	4	1.9427
HNRNPR	4	0.004264	0.014875	0.424486	655	2	0.33366
FRMPD1	4	0.0042693	0.014893	0.424486	656	4	1.168
PHACTR4	4	0.0042976	0.014987	0.425885	657	3	1.0133
ADGRL2	4	0.0043057	0.015013	0.425885	658	3	0.75949
KANK4	4	0.0043121	0.015033	0.425885	659	3	0.87237
TSKS	4	0.0043122	0.015033	0.425885	660	3	0.85656
CLCA2	4	0.0043317	0.015102	0.4266	661	3	1.0262
CASP8	4	0.0043324	0.015104	0.4266	662	4	0.88511
LTV1	4	0.0043954	0.015299	0.430597	663	3	1.5441
WARS	4	0.0044069	0.015331	0.430597	664	3	1.0813
MPP6	4	0.0044096	0.015335	0.430597	665	2	0.52381
WDR83	4	0.0044102	0.015337	0.430597	666	4	1.0022
MTF2	4	0.0044224	0.015377	0.430958	667	2	0.71035
C8A	4	0.0044399	0.015437	0.430958	668	3	1.1171
DPYD	4	0.0044432	0.015448	0.430958	669	3	0.81614
WNT2B	4	0.0044481	0.015465	0.430958	670	3	1.0353
BRIX1	4	0.0044482	0.015465	0.430958	671	3	1.2598
LRRC37A2	4	0.0044634	0.015514	0.43167	672	4	0.62034
IREB2	4	0.0044747	0.015563	0.432395	673	4	0.84138
ITGAL	4	0.0044997	0.015641	0.433911	674	3	0.86932
TSPAN1	4	0.0045063	0.015664	0.433911	675	3	0.72976
SOD2	4	0.0045314	0.015754	0.435768	676	3	0.85551
RHOT1	4	0.0045566	0.015845	0.436651	677	3	1.0017
DDX55	4	0.0045616	0.015863	0.436651	678	3	1.157
NUDT14	4	0.0045684	0.015881	0.436651	679	3	0.90617
ZNF326	4	0.0045686	0.015882	0.436651	680	4	0.8871
HEATR6	4	0.0045904	0.01596	0.437605	681	2	0.86253
MED24	4	0.0046426	0.016129	0.441577	682	3	1.6072
PICK1	4	0.0046558	0.016168	0.442016	683	3	1.0433
NCBP3	4	0.0046756	0.016239	0.443289	684	4	0.6484
SET	3	0.0046829	0.01298	0.395806	685	3	1.0539
AADACL3	4	0.0046996	0.016324	0.444962	686	2	0.51478
GRWD1	4	0.0047095	0.016356	0.445207	687	4	1.0521
DDX54	4	0.0047232	0.016409	0.445982	688	4	1.3377
DDA1	4	0.0047431	0.016483	0.447343	689	4	0.98253
TEFM	4	0.0047727	0.016595	0.449744	690	4	1.1058
PUM1	4	0.0047895	0.01665	0.450581	691	4	1.0627
FCER2	4	0.0048045	0.016702	0.45133	692	3	0.8797
MGAT3	4	0.0048273	0.016771	0.451353	693	4	0.73699
FAM71A	4	0.0048323	0.016784	0.451353	694	3	0.80939
RAB34	4	0.0048376	0.016798	0.451353	695	3	0.88036
LRRC8A	4	0.0048462	0.01683	0.451543	696	4	0.75811
MSH4	4	0.0048551	0.016861	0.451719	697	3	1.3562
KIAA1522	4	0.0048964	0.017003	0.454393	698	4	0.87679
GOSR1	4	0.0049145	0.017056	0.454393	699	4	0.43275
UNK	4	0.0049237	0.017093	0.454393	700	3	0.76707
MFNG	4	0.0049353	0.01713	0.454393	701	2	0.55649
SEH1L	4	0.0049396	0.017141	0.454393	702	3	1.1053
GNPTG	4	0.0049443	0.017156	0.454393	703	4	1.03
ATP13A2	4	0.0049449	0.017157	0.454393	704	4	0.57481
CALCOCO2	4	0.0049578	0.017199	0.454393	705	3	1.0579
GNAI3	4	0.0049591	0.017203	0.454393	706	4	0.81529
NSD2	4	0.0049744	0.017255	0.455132	707	4	1.3015
VPS11	4	0.0049894	0.017305	0.455716	708	2	0.55016
DPH2	4	0.005003	0.017338	0.455716	709	2	0.57268
VASN	4	0.0050071	0.017355	0.455716	710	4	0.46429
AANAT	4	0.0050142	0.017374	0.455716	711	4	0.86438
NRF1	4	0.0050347	0.017457	0.457236	712	2	0.67414
WDR4	4	0.0050861	0.017624	0.46099	713	3	0.81485
HINT3	4	0.0050937	0.017652	0.461065	714	4	0.97695
MYSM1	4	0.0051856	0.017943	0.468011	715	3	0.85255
TSTD1	4	0.0052108	0.018035	0.469487	716	4	0.99508
BMPER	4	0.0052161	0.018049	0.469487	717	4	0.77758
RPS16	4	0.0052244	0.018076	0.469536	718	3	1.8261
GIPC3	4	0.0052336	0.018114	0.469873	719	3	0.95413
LSM6	4	0.005276	0.018248	0.472683	720	3	1.0299
NHP2	4	0.0052922	0.01831	0.472939	721	3	1.3528
SOCS1	4	0.0052968	0.018323	0.472939	722	2	0.53903
MAP2K7	4	0.0053	0.018334	0.472939	723	4	0.62171
RTF1	4	0.0053294	0.018424	0.474629	724	3	0.93989
DHX58	4	0.0053504	0.018486	0.475539	725	4	1.2645
C17orf50	4	0.0053577	0.01851	0.475539	726	3	1.2968
MIEF2	4	0.0053726	0.018554	0.475552	727	3	1.0271
SGIP1	4	0.0053745	0.018562	0.475552	728	3	0.77396
FAM131C	4	0.0053876	0.018596	0.475795	729	3	0.80546
FAM162B	4	0.0054392	0.01879	0.480083	730	4	0.72701
SOD1	4	0.0054611	0.018863	0.4812	731	4	1.4133
CHCHD4	4	0.0054676	0.018885	0.4812	732	4	0.68171
MAD2L2	4	0.0055107	0.019031	0.484269	733	2	0.65392
KIAA2013	4	0.0055406	0.019124	0.484902	734	3	1.1508
ABLIM1	4	0.0055425	0.019129	0.484902	735	3	1.0075
ATG4C	4	0.005551	0.019152	0.484902	736	2	0.79522
DMXL2	4	0.0055634	0.019185	0.484902	737	4	0.46905
GCM1	4	0.0055731	0.019215	0.485009	738	3	0.8377
MTHFD1	4	0.0055901	0.019277	0.485914	739	4	1.4016
C7orf61	4	0.0056562	0.0195	0.490883	740	4	0.89638
TRAF4	4	0.0056925	0.01962	0.492763	741	3	0.86505
NUP43	4	0.0056945	0.019627	0.492763	742	4	1.0866
LRRC37B	4	0.0057044	0.019658	0.492859	743	4	0.69516
SETSIP	4	0.0057361	0.019768	0.494977	744	4	0.52347
NPPA	4	0.005747	0.019799	0.495069	745	3	0.84468
ARHGEF18	4	0.0058136	0.020005	0.498817	746	4	0.71198
ITGB4	4	0.0058216	0.020028	0.498817	747	4	0.57836
ZZZ3	4	0.0058498	0.020121	0.500184	748	3	0.75318
ADGRL4	4	0.005855	0.020136	0.500184	749	4	1.1555
FAM234A	4	0.0058768	0.020216	0.5015	750	4	0.92447
FASN	4	0.0059065	0.020325	0.503544	751	3	0.60657
VWA5B2	4	0.0059406	0.020448	0.504931	752	4	0.60994
SLC25A24	4	0.0059429	0.020458	0.504931	753	3	1.0849
NOP58	4	0.0059441	0.020462	0.504931	754	2	1.1209
PPRC1	4	0.0059724	0.02055	0.50644	755	3	0.74603
CCDC86	4	0.0060003	0.020654	0.507734	756	4	1.3468
SOX15	4	0.0060284	0.020753	0.509346	757	4	0.67615
KIF7	4	0.0060425	0.020801	0.509346	758	4	1.1766
THEM5	4	0.0060484	0.020819	0.509346	759	4	0.88859
RBPMS	4	0.006052	0.020831	0.509346	760	4	0.38229
AGO3	4	0.0060911	0.020951	0.511425	761	3	1.2614
S100A16	4	0.0060992	0.020976	0.511425	762	3	0.63047
RALA	4	0.0061062	0.020998	0.511425	763	3	0.63845
PIK3R4	4	0.0061219	0.021044	0.511879	764	4	1.4953
WDR55	4	0.0061439	0.021121	0.513088	765	4	1.863
FAM3A	4	0.0061589	0.021174	0.513718	766	4	0.48981
PGK2	4	0.0062009	0.021304	0.515456	767	4	0.70241
MRPS34	4	0.0062021	0.021308	0.515456	768	4	0.74695
U2SURP	4	0.0062196	0.021363	0.515456	769	3	0.67369
PXDC1	4	0.0062213	0.021371	0.515456	770	3	0.69497
NDUFA4	3	0.0062341	0.01707	0.454393	771	2	1.0432
CMTR1	4	0.006236	0.021424	0.515773	772	3	1.2664
C19orf38	4	0.0062588	0.021493	0.516238	773	4	0.78038
GAR1	4	0.0062649	0.021511	0.516238	774	4	1.4948
DLC1	4	0.0062697	0.021526	0.516238	775	4	0.4747
RFC3	4	0.0063232	0.02169	0.519076	776	3	0.83473
EXOC4	4	0.0063272	0.0217	0.519076	777	2	0.33999
ATP5I	4	0.0063373	0.021733	0.519222	778	4	0.91543
AP5Z1	4	0.0063513	0.021781	0.519613	779	4	0.6315
NPC1L1	4	0.0063576	0.021805	0.519613	780	3	1.0939
ATP5A1	4	0.006378	0.021873	0.520575	781	3	1.1874
PRR32	4	0.0063918	0.021916	0.520931	782	4	0.66762
KRT17	4	0.006414	0.021988	0.521983	783	4	0.85896
WEE1	4	0.0064315	0.022041	0.522568	784	1	-0.54072
ZFYVE27	4	0.0064628	0.022145	0.523433	785	3	0.76764
CEP95	4	0.0064775	0.022186	0.523433	786	3	1.0124
MDN1	4	0.0064852	0.022211	0.523433	787	4	1.9611
CD200R1L	4	0.0064957	0.022252	0.523433	788	4	0.69418
PDE4B	4	0.006497	0.022257	0.523433	789	4	0.71382
TMOD2	4	0.0065082	0.022291	0.523433	790	4	0.56097
RBP3	4	0.0065108	0.022299	0.523433	791	3	0.69924
TEKT2	4	0.0065113	0.0223	0.523433	792	3	0.61301
DIRC2	4	0.0065419	0.022405	0.524956	793	4	0.40433
TMEM56	4	0.0065495	0.022428	0.524956	794	3	0.76482
NUDT11	4	0.0065557	0.022449	0.524956	795	4	0.58653
TTC7A	4	0.0065808	0.022528	0.525707	796	4	0.59836
CFI	4	0.0065829	0.022538	0.525707	797	2	0.51153
EEF2	4	0.0065984	0.022587	0.52621	798	3	1.4914
TMEM167B	4	0.0066091	0.022624	0.526405	799	3	0.74728
VTCN1	4	0.0066464	0.022756	0.52882	800	4	0.64642
JAM2	4	0.0066819	0.02287	0.530812	801	3	0.90143
ARSJ	4	0.0066991	0.022928	0.531514	802	3	0.8966
LRP8	4	0.0067282	0.023032	0.533266	803	4	1.0664
EBNA1BP2	4	0.0067445	0.023093	0.534013	804	3	1.6369
AKNAD1	4	0.0068052	0.023277	0.536977	805	3	1.4172
KRT26	4	0.0068161	0.023313	0.536977	806	3	0.92115
NOP53	4	0.0068224	0.023327	0.536977	807	2	0.82841
TMIGD1	4	0.0068268	0.023341	0.536977	808	4	0.76019
EPHX4	4	0.0068358	0.023364	0.536977	809	4	0.79669
NOL11	4	0.0068663	0.023461	0.53855	810	3	2.2666
CYP4B1	4	0.0068882	0.023527	0.539006	811	3	1.1002
BLVRA	4	0.0068929	0.02354	0.539006	812	4	0.54937
GMPS	4	0.006902	0.023568	0.539006	813	4	1.5566
NT5C1B	4	0.0069365	0.023677	0.540846	814	3	0.71093
DDX59	4	0.0069596	0.023748	0.54087	815	2	0.85603
ARHGDIG	4	0.0069687	0.023782	0.54087	816	4	0.95719
FOXB1	4	0.0069727	0.023797	0.54087	817	4	0.60553
DBT	4	0.0069755	0.023807	0.54087	818	3	0.74022
BRK1	4	0.0069851	0.023836	0.54087	819	3	0.9413
IL12RB2	4	0.0069917	0.023862	0.54087	820	3	0.90633
LHFP	4	0.0069984	0.023887	0.54087	821	4	0.73928
CDC16	4	0.007005	0.023909	0.54087	822	3	0.98042
TTF1	4	0.0070234	0.023962	0.541423	823	3	1.0805
MROH6	4	0.0070478	0.024036	0.542097	824	4	0.65194
OPA3	4	0.0070517	0.02405	0.542097	825	3	0.77685
PTBP2	4	0.0070637	0.024091	0.542373	826	4	0.86794
MYH9	4	0.0070806	0.024149	0.543041	827	3	0.64718
GNL3	4	0.0071249	0.024302	0.545829	828	4	1.3096
NRBF2	4	0.0071351	0.024336	0.545934	829	3	1.282
PIFO	4	0.0071811	0.024489	0.547526	830	4	0.74717
INPP5D	4	0.0071893	0.024516	0.547526	831	1	-0.0083213
TDP2	4	0.0072018	0.024549	0.547526	832	3	0.89367
NKAPL	4	0.0072055	0.024562	0.547526	833	2	0.59019
RASD2	4	0.0072163	0.02459	0.547526	834	3	0.86248
CARS	4	0.0072176	0.024594	0.547526	835	4	0.80699
KATNBL1	4	0.0072266	0.02462	0.547526	836	3	0.76698
SRFBP1	4	0.0072416	0.024666	0.547526	837	4	0.81646
PRIM1	4	0.0072434	0.024671	0.547526	838	2	0.23149
FRMD5	4	0.0072541	0.024712	0.547526	839	2	0.78011
ENO3	4	0.0072687	0.024749	0.547526	840	4	0.66771
NEFM	4	0.0072703	0.024757	0.547526	841	2	0.59485
SH3GLB1	4	0.0072904	0.024822	0.548183	842	4	0.69101
LYPD4	4	0.0072975	0.024846	0.548183	843	1	-0.19016
LRRC46	4	0.0073312	0.024948	0.549796	844	4	1.3588
RHEB	3	0.0073387	0.019956	0.498352	845	3	0.82342
SSBP3	4	0.0073544	0.025017	0.550661	846	4	0.65278
VAX1	4	0.0073681	0.025054	0.550663	847	4	0.78545
RAB11B	4	0.0073844	0.025105	0.550663	848	3	0.70192
THAP11	4	0.0074023	0.025166	0.550938	849	4	0.76119
MAFF	4	0.0074057	0.025176	0.550938	850	1	-0.027883
RAPSN	4	0.0074147	0.02521	0.551034	851	4	0.60132
RSPH1	4	0.0074464	0.025299	0.552147	852	4	0.97858
ZNF8	4	0.0074519	0.02532	0.552147	853	4	0.47831
PGD	4	0.0075003	0.025485	0.555105	854	4	1.6503
RHBDL3	4	0.00755	0.025629	0.556914	855	3	0.80451
LRRC8C	4	0.0075523	0.025634	0.556914	856	3	0.68438
CYP21A2	4	0.0075601	0.025657	0.556914	857	4	0.5173
ZFP69B	4	0.0075797	0.025719	0.557602	858	4	0.66222
SCARA3	4	0.0075978	0.025778	0.557602	859	4	0.52404
RFX6	4	0.007602	0.025792	0.557602	860	4	0.76788
CCNDBP1	4	0.0076203	0.025839	0.557602	861	4	0.8718
SEBOX	4	0.0076221	0.025842	0.557602	862	3	0.80525
ALPL	4	0.0076301	0.025867	0.557602	863	4	0.71165
PYDC1	4	0.0076504	0.025926	0.557765	864	3	0.92889
ALG6	4	0.0076538	0.025934	0.557765	865	3	0.82526
CRHR1	4	0.0076903	0.026035	0.559281	866	3	0.86976
AKR1A1	4	0.0077115	0.026104	0.560125	867	3	0.97212
AP1M1	4	0.0077473	0.026217	0.561918	868	4	0.52069
PCDHA9	4	0.0077616	0.026263	0.562093	869	4	0.58968
ZADH2	4	0.0077658	0.026285	0.562093	870	4	1.0193
NUTM2B	4	0.0077801	0.026329	0.562377	871	4	0.52782
AARS2	4	0.0077972	0.02638	0.562841	872	4	0.74229
VTI1A	4	0.0078062	0.026412	0.562866	873	3	0.79349
MOB4	4	0.0078252	0.02647	0.563474	874	3	0.72981
PPP1R10	4	0.0078372	0.026512	0.563656	875	4	0.88884
CDRT15	4	0.0078501	0.026558	0.563656	876	4	0.45942
MAP3K7CL	4	0.0078547	0.026569	0.563656	877	3	0.7354
ZNF526	4	0.0078889	0.026678	0.565324	878	4	0.43159
GPI	4	0.0079236	0.026786	0.566977	879	4	0.66839
SEC14L4	4	0.0079674	0.026915	0.569061	880	3	0.95509
C22orf31	4	0.0080073	0.027041	0.571085	881	3	0.8405
TOE1	4	0.0080315	0.027126	0.572247	882	3	0.73763
METTL16	4	0.0080822	0.027289	0.574707	883	4	1.5866
MIEN1	4	0.0080873	0.027304	0.574707	884	3	0.83281
IDI1	4	0.0081131	0.027383	0.575728	885	4	0.72622
BCL11A	4	0.0081492	0.027495	0.577434	886	3	0.76071
HMGCS2	4	0.0081606	0.027528	0.577464	887	3	0.76878
IQCF1	4	0.008175	0.027576	0.577825	888	4	0.66292
NIPBL	4	0.0082007	0.027656	0.578656	889	2	0.5486
MMP28	4	0.0082076	0.027677	0.578656	890	4	0.89174
TJAP1	4	0.0082418	0.027782	0.580195	891	4	0.42285
TXNDC17	4	0.0082671	0.027867	0.580897	892	4	0.60654
MSANTD1	4	0.0082696	0.027877	0.580897	893	2	0.48004
ADPRM	4	0.0082868	0.027929	0.58134	894	2	0.58453
MARS2	4	0.0083	0.027968	0.581508	895	4	0.68078
RPL23	4	0.0083225	0.028038	0.5823	896	4	1.359
KYAT3	4	0.0084024	0.028286	0.58679	897	3	0.87722
DDX28	4	0.0084121	0.028316	0.58679	898	3	0.5409
BTBD8	4	0.008482	0.028549	0.590761	899	3	1.058
CHI3L2	4	0.0084873	0.028572	0.590761	900	2	0.21838
MRPS12	4	0.0084971	0.028602	0.590761	901	3	1.0076
PCGF6	4	0.0085297	0.028708	0.592279	902	3	0.85151
CEP135	4	0.0086104	0.028979	0.595596	903	3	0.75323
AMDHD2	4	0.008611	0.028981	0.595596	904	4	0.49582
KRTAP1-4	4	0.0086181	0.029002	0.595596	905	2	0.42857
FLAD1	4	0.0086402	0.029084	0.595596	906	4	0.5562
DPM3	4	0.0086479	0.029119	0.595596	907	4	0.58757
ACAP1	4	0.0086484	0.02912	0.595596	908	3	0.50927
BIK	4	0.0086495	0.029123	0.595596	909	3	0.69507
SLC25A19	4	0.008656	0.029142	0.595596	910	3	0.72324
RICTOR	4	0.0086587	0.029154	0.595596	911	4	1.2651
ZNF75A	4	0.0086945	0.029276	0.597437	912	3	0.75838
TMED5	4	0.0087122	0.029339	0.598068	913	2	0.88639
MEIOC	4	0.0087758	0.029554	0.60127	914	4	0.50047
FBXL22	4	0.0087783	0.02956	0.60127	915	4	0.5475
CCL11	4	0.0088017	0.029638	0.602207	916	4	0.58582
ACOT4	4	0.0088959	0.029918	0.607234	917	2	0.3432
MIS18A	4	0.0089432	0.030068	0.609607	918	3	1.6174
ZNF621	4	0.0089559	0.03011	0.609804	919	4	0.40376
RAB9A	4	0.0090162	0.030305	0.612044	920	4	0.5788
MARCKS	4	0.0090194	0.030318	0.612044	921	4	0.57384
SYNJ1	4	0.009029	0.030354	0.61211	922	3	0.76002
ATP1A1	4	0.0090453	0.030406	0.612505	923	3	1.2782
METTL22	4	0.0090753	0.030509	0.613762	924	4	0.39884
WAC	4	0.0091153	0.030623	0.613762	925	4	0.79031
SHMT1	4	0.0091234	0.03065	0.613762	926	4	0.65978
OTOL1	4	0.0091314	0.030684	0.613762	927	4	0.82896
TOB2	4	0.009133	0.030692	0.613762	928	4	0.61191
BAALC	4	0.009141	0.030714	0.613762	929	4	0.55319
COX7C	4	0.0091416	0.030715	0.613762	930	4	1.1253
TIMM23	4	0.0091523	0.030749	0.613762	931	4	0.8432
WLS	4	0.0091597	0.03077	0.613762	932	3	0.79524
C6orf89	4	0.0091668	0.030802	0.613762	933	4	0.5419
THRAP3	4	0.0091778	0.030839	0.613762	934	3	0.77087
IQCF3	4	0.0091863	0.030862	0.613762	935	3	0.70319
L3MBTL3	4	0.0092021	0.03092	0.614265	936	3	0.72961
ATXN7	4	0.0092383	0.031044	0.616088	937	2	0.68787
UAP1	4	0.0092655	0.031122	0.616986	938	4	0.78897
EMC1	4	0.0092762	0.031157	0.617014	939	3	0.8314
DDX39A	4	0.0093421	0.031357	0.61953	940	4	0.92198
VAC14	4	0.0093585	0.031422	0.61953	941	4	0.92082
VPS8	4	0.0093599	0.031429	0.61953	942	2	0.11029
BTBD6	4	0.0093613	0.031431	0.61953	943	3	0.89098
CCNH	4	0.0093721	0.031469	0.61953	944	3	1.5308
DMAP1	4	0.0094068	0.031574	0.61953	945	3	1.2088
NTNG1	4	0.0094149	0.0316	0.61953	946	3	0.99466
RPS15	4	0.009421	0.031614	0.61953	947	3	0.91753
DRG2	4	0.0094255	0.031627	0.61953	948	3	0.70185
SLC22A23	4	0.0094274	0.031631	0.61953	949	4	0.79786
PARD3	4	0.0094324	0.031647	0.61953	950	4	0.71161
FAM8A1	4	0.0094538	0.031724	0.620397	951	4	1.0728
POTEH	4	0.0095068	0.031885	0.621733	952	2	0.58814
MRPL47	4	0.0095253	0.031948	0.621733	953	2	0.74286
ZNF646	4	0.0095277	0.031954	0.621733	954	3	0.81269
ACACA	4	0.0095314	0.031967	0.621733	955	2	0.20021
ERO1A	4	0.0095365	0.031984	0.621733	956	4	0.58579
MRPS24	4	0.0095437	0.032007	0.621733	957	2	0.68139
NT5C3B	4	0.0095493	0.032025	0.621733	958	3	0.63119
NUPL2	4	0.0095914	0.032164	0.623798	959	4	0.9117
PATJ	4	0.0096399	0.032319	0.62516	960	4	1.1799
CHRNA7	4	0.0096432	0.03233	0.62516	961	4	0.52534
SEPHS1	4	0.0096499	0.032357	0.62516	962	4	0.81581
MKRN2OS	4	0.00966	0.032389	0.62516	963	4	0.55226
SYNRG	4	0.0096672	0.032413	0.62516	964	3	0.84667
KIAA0753	4	0.0096795	0.032449	0.62516	965	3	0.76718
MYT1L	4	0.0096852	0.032468	0.62516	966	4	0.80026
MLLT11	4	0.0097441	0.032657	0.62722	967	4	0.72999
CCDC18	4	0.0097478	0.032668	0.62722	968	3	1.1117
AIF1	4	0.0097533	0.032686	0.62722	969	3	0.85558
SEMA4D	4	0.0097603	0.032709	0.62722	970	2	0.23707
SERPIND1	4	0.0098202	0.032894	0.629688	971	4	0.74137
IPO7	4	0.0098236	0.032905	0.629688	972	4	0.6959
TM2D2	4	0.0098538	0.032992	0.630711	973	3	0.71391
KARS	4	0.0099545	0.033296	0.635703	974	3	1.239
ZSWIM1	4	0.0099629	0.033321	0.635703	975	3	0.65153
LCE1D	4	0.010016	0.033489	0.638257	976	3	0.95648
CLRN2	4	0.010029	0.033535	0.638493	977	3	0.62728
ARL14EP	4	0.010058	0.033623	0.639465	978	4	0.78103
TYW3	4	0.010069	0.033658	0.639465	979	3	1.0358
C12orf45	4	0.010084	0.033703	0.639465	980	4	0.72569
CTBS	4	0.010091	0.033722	0.639465	981	4	0.76424
PRKCI	4	0.010108	0.033775	0.639547	982	3	1.1368
KDM8	4	0.010116	0.033803	0.639547	983	3	0.57458
MMGT1	4	0.010124	0.033829	0.639547	984	2	0.31469
CDC42	2	0.010137	0.019163	0.484902	985	2	0.89744
SPNS2	4	0.010175	0.033982	0.641607	986	3	0.95969
NHLRC4	4	0.010182	0.034006	0.641607	987	4	0.90038
KCNMA1	4	0.010223	0.034133	0.64334	988	3	0.94821
ICMT	4	0.010251	0.034223	0.643867	989	4	0.66576
UBA52	4	0.010257	0.034245	0.643867	990	3	0.84421
NHLH2	4	0.010263	0.034264	0.643867	991	3	2.05
EPHA10	4	0.010305	0.034402	0.645243	992	3	0.73673
STARD3	4	0.010306	0.034406	0.645243	993	4	0.73391
IFT57	4	0.010318	0.034451	0.645449	994	4	0.2617
C1QTNF12	4	0.010345	0.034538	0.646425	995	3	1.163
HIST1H4B	4	0.010382	0.034651	0.647187	996	4	1.0047
ATP2C1	4	0.010392	0.03469	0.647187	997	4	0.44304
RPF2	4	0.010402	0.034724	0.647187	998	3	1.1921
TCEANC2	4	0.010415	0.034776	0.647187	999	4	0.79012
SNX24	4	0.010417	0.034782	0.647187	1000	4	0.58603
PIGK	4	0.010428	0.034813	0.647187	1001	4	0.59269
PRIMA1	4	0.010432	0.034825	0.647187	1002	2	0.47636
YDJC	4	0.010443	0.034854	0.647187	1003	2	0.83689
SLC28A2	4	0.010458	0.034908	0.647545	1004	4	0.64734
SMG8	4	0.010486	0.034998	0.648495	1005	2	-0.19633
MRPL18	4	0.010506	0.035062	0.648495	1006	4	0.93542
TPM4	4	0.010511	0.035078	0.648495	1007	3	1.0108
TAF1D	4	0.010516	0.035098	0.648495	1008	3	0.96081
PRKACB	4	0.010528	0.035142	0.648666	1009	3	0.67528
RPL30	4	0.010552	0.035208	0.648753	1010	3	1.1979
AGMAT	4	0.010554	0.035215	0.648753	1011	3	1.2714
SLFN14	4	0.01058	0.035292	0.649194	1012	3	0.66395
NSRP1	4	0.010592	0.035331	0.649194	1013	4	0.6603
MAN2B1	4	0.010597	0.035343	0.649194	1014	2	0.77378
RSL1D1	4	0.010648	0.035495	0.65106	1015	3	0.71501
GDF15	4	0.010655	0.035518	0.65106	1016	4	0.84353
SAMD3	4	0.010669	0.035559	0.65106	1017	2	0.4037
FCN3	4	0.010679	0.035585	0.65106	1018	4	0.5934
HOXB6	4	0.010695	0.035627	0.65106	1019	4	0.42934
GCDH	4	0.010706	0.035653	0.65106	1020	4	0.83078
EVL	4	0.010717	0.035688	0.651062	1021	4	0.29321
HOOK1	4	0.010751	0.035799	0.65245	1022	3	0.89855
NFU1	4	0.010773	0.035865	0.653028	1023	4	1.1663
HSD17B10	4	0.010809	0.035992	0.654699	1024	4	0.52959
NDUFAF4	4	0.010826	0.036035	0.654783	1025	4	0.69947
WWTR1	4	0.010838	0.036066	0.654783	1026	3	0.74534
C1orf123	4	0.010865	0.036153	0.65572	1027	3	0.84528
CORO6	4	0.010884	0.036218	0.656031	1028	3	0.65321
TMEM115	4	0.010891	0.03624	0.656031	1029	3	0.83903
FFAR3	4	0.010943	0.036392	0.657034	1030	3	0.69342
WDHD1	4	0.010944	0.036394	0.657034	1031	3	0.97977
DCAF1	4	0.010947	0.036401	0.657034	1032	3	1.3306
RAB38	4	0.010969	0.036462	0.657303	1033	2	0.59632
ID2	4	0.010976	0.036486	0.657303	1034	4	0.5566
NDUFA11	4	0.011002	0.03657	0.658183	1035	2	0.28312
DRAP1	4	0.011018	0.036628	0.658534	1036	3	0.97364
SELENOV	4	0.011028	0.036659	0.658534	1037	4	0.61764
OSTM1	4	0.011042	0.036704	0.6587	1038	3	0.77668
PAQR4	4	0.011065	0.036769	0.658835	1039	3	0.8088
HCN2	4	0.011083	0.036826	0.658835	1040	3	0.57281
ZNF670	4	0.011088	0.036839	0.658835	1041	2	0.45641
GTF3C1	4	0.011101	0.036887	0.658835	1042	3	0.83594
RARS	4	0.011113	0.036925	0.658835	1043	4	0.76812
USP22	4	0.011123	0.036957	0.658835	1044	4	0.92138
KANK3	4	0.011146	0.037023	0.659384	1045	3	0.65308
BMP6	4	0.011166	0.037082	0.659598	1046	4	0.6077
MAPK14	4	0.011174	0.037105	0.659598	1047	2	0.16841
LIG3	4	0.011241	0.037317	0.662284	1048	1	0.1281
CEPT1	4	0.011244	0.037327	0.662284	1049	4	0.86482
RSL24D1	4	0.01132	0.037564	0.665041	1050	2	0.60289
WDR83OS	4	0.011333	0.037609	0.665041	1051	3	1.1284
CEBPZ	4	0.011338	0.037624	0.665041	1052	3	1.2725
RNF213	4	0.011373	0.037742	0.666494	1053	4	0.68075
NDUFB7	4	0.011409	0.037858	0.667335	1054	4	0.64739
MRPS10	4	0.01141	0.037861	0.667335	1055	3	1.5175
COA1	4	0.011435	0.037941	0.667783	1056	4	0.64015
HCN4	4	0.011441	0.037958	0.667783	1057	4	0.36315
FETUB	4	0.011466	0.038026	0.668363	1058	4	0.42356
RNPS1	4	0.011485	0.038081	0.668702	1059	4	1.3636
UNC45B	4	0.011498	0.038118	0.668724	1060	4	0.75317
DummyGuide_1122	1	0.011514	0.011442	0.366193	1061	1	1.2751
MICA	4	0.011532	0.038224	0.669787	1062	3	0.9207
MKNK1	4	0.01154	0.03825	0.669787	1063	4	0.85973
PLXNB3	4	0.011568	0.03833	0.670557	1064	3	0.81123
GTF2H4	4	0.011581	0.038373	0.670585	1065	4	0.63469
FOXR2	4	0.011601	0.03844	0.670585	1066	3	0.6266
INTS1	4	0.011605	0.038448	0.670585	1067	3	1.0313
ISG20	4	0.011614	0.038474	0.670585	1068	3	0.73216
PARVB	4	0.011635	0.038538	0.670893	1069	3	0.74267
RGPD4	4	0.011642	0.038564	0.670893	1070	4	0.5576
IARS	4	0.011683	0.038683	0.672345	1071	4	0.97295
P3H1	4	0.011716	0.038788	0.673547	1072	2	0.37051
OPTC	4	0.011805	0.03906	0.67765	1073	4	1.3982
SMARCA4	4	0.011828	0.039141	0.67794	1074	4	0.55793
ALKBH5	4	0.011839	0.039182	0.67794	1075	3	0.69266
PDGFB	4	0.011848	0.039205	0.67794	1076	3	0.639
ASCL3	4	0.011873	0.039275	0.67794	1077	4	0.81126
ENDOD1	4	0.011885	0.039302	0.67794	1078	3	0.93672
DUSP2	4	0.011892	0.039325	0.67794	1079	3	0.8642
TTC27	4	0.011893	0.03933	0.67794	1080	3	1.2657
PDZD9	4	0.01192	0.039421	0.678882	1081	4	0.55888
CASC3	4	0.011975	0.039587	0.68112	1082	4	0.90355
FGD4	4	0.011991	0.039644	0.681133	1083	3	0.86237
SMOX	4	0.011997	0.039661	0.681133	1084	4	0.39616
DMTF1	4	0.012019	0.039725	0.681606	1085	3	0.49586
GRPEL1	4	0.01205	0.039816	0.681691	1086	1	-1.6423
BRAT1	4	0.012056	0.039835	0.681691	1087	4	0.95614
AFG3L2	4	0.012057	0.039839	0.681691	1088	2	0.71062
NOP56	4	0.012082	0.039912	0.682324	1089	3	1.9975
ARHGEF15	4	0.012099	0.039974	0.68265	1090	3	0.73339
TACC3	4	0.01211	0.040004	0.68265	1091	3	0.88831
ZPR1	4	0.012126	0.040054	0.682876	1092	4	0.85465
HNRNPD	4	0.01215	0.04012	0.683389	1093	4	0.82963
STRADB	4	0.012196	0.040278	0.685047	1094	4	0.31194
C11orf57	4	0.012211	0.040326	0.685047	1095	3	0.65432
GEMIN2	4	0.012212	0.040327	0.685047	1096	3	0.60344
ALDOC	4	0.012244	0.040431	0.685514	1097	4	0.49764
RPS14	4	0.012259	0.040479	0.685514	1098	4	1.5989
GP1BA	4	0.012266	0.040501	0.685514	1099	3	0.65378
HIST1H1B	4	0.012303	0.04062	0.686914	1100	3	1.0999
PMF1	4	0.012354	0.040778	0.688119	1101	4	1.6635
KRT12	4	0.012368	0.040822	0.688119	1102	3	1.2747
CCSAP	4	0.012375	0.040838	0.688119	1103	2	0.60572
MRC2	4	0.012389	0.040882	0.688168	1104	3	0.81702
CCDC120	4	0.012407	0.04094	0.688168	1105	4	0.45053
ZNF503	4	0.01241	0.040951	0.688168	1106	3	1.4029
SLC35A2	4	0.012449	0.041077	0.688955	1107	4	0.68399
LUC7L3	4	0.012469	0.041135	0.688955	1108	4	1.8772
TFF1	4	0.012473	0.041149	0.688955	1109	4	0.4589
IQCE	4	0.012485	0.041185	0.688955	1110	3	0.66414
VARS	4	0.012488	0.041193	0.688955	1111	3	0.92998
PKIA	4	0.012516	0.041276	0.688955	1112	4	0.50088
TIMMDC1	4	0.012518	0.041285	0.688955	1113	4	0.56419
USP32	4	0.012524	0.041298	0.688955	1114	4	0.56301
ACTG1	4	0.012536	0.041328	0.688955	1115	4	0.76453
SLC39A11	4	0.012557	0.041384	0.689266	1116	4	0.49555
ANXA2R	4	0.012594	0.041504	0.690658	1117	3	0.83654
PRR15	4	0.012608	0.041552	0.690776	1118	4	0.4261
RPL10A	4	0.012617	0.041585	0.690776	1119	3	1.2813
LOR	4	0.012647	0.041668	0.691549	1120	4	1.097
HLA-F	4	0.012663	0.041715	0.691708	1121	4	0.51957
TSEN54	4	0.012688	0.041794	0.6924	1122	3	1.0606
CCT8	4	0.012725	0.041899	0.693117	1123	3	0.72164
ANKRD65	4	0.01273	0.041911	0.693117	1124	4	0.83787
SIDT1	4	0.01276	0.042009	0.693482	1125	3	1.148
BCL2L10	4	0.012775	0.042066	0.693482	1126	3	0.6003
PAX9	4	0.012781	0.042084	0.693482	1127	3	0.89826
TMEM88B	4	0.012782	0.042085	0.693482	1128	3	0.95306
LSG1	4	0.012806	0.042151	0.693482	1129	4	0.5418
NOL12	4	0.012808	0.042155	0.693482	1130	3	1.0155
SMAD2	4	0.012853	0.042282	0.694965	1131	3	0.79531
NUDT19	4	0.012887	0.042395	0.696212	1132	4	0.53829
MARVELD3	4	0.012922	0.042503	0.696808	1133	4	1.0261
RGL2	4	0.012937	0.042554	0.696808	1134	2	0.37437
SAMD4B	4	0.012955	0.042604	0.696808	1135	3	1.1306
BECN1	4	0.012958	0.042617	0.696808	1136	3	0.73358
ERVFRD-1	4	0.012967	0.042638	0.696808	1137	3	0.88504
KANK2	4	0.012971	0.042654	0.696808	1138	3	0.66941
RNPC3	4	0.012987	0.042704	0.697012	1139	3	1.06
PDE8B	4	0.013015	0.042802	0.698007	1140	3	0.79395
EIF3L	4	0.013074	0.042959	0.699955	1141	3	0.52537
TSPAN18	4	0.013111	0.043077	0.701273	1142	4	0.7989
SRR	4	0.013149	0.043186	0.701996	1143	3	0.52726
TRIM50	4	0.013153	0.043196	0.701996	1144	3	0.84274
FARSB	4	0.013182	0.043277	0.702692	1145	3	1.0668
KNCN	4	0.013216	0.043391	0.703942	1146	4	0.9731
ARMC4	4	0.013256	0.043514	0.705328	1147	4	0.77339
TBC1D2B	4	0.013276	0.043585	0.705864	1148	4	0.50517
MYO6	4	0.01329	0.043627	0.70593	1149	2	0.61039
COQ3	4	0.013323	0.043721	0.706829	1150	4	1.0184
MRPL51	4	0.013336	0.043758	0.706829	1151	4	0.51794
SDHD	2	0.013349	0.025083	0.550663	1152	2	1.9104
TMEM248	4	0.013395	0.043941	0.709003	1153	2	0.22637
H3F3B	4	0.013408	0.043982	0.709003	1154	4	0.69399
GNG11	4	0.013419	0.044009	0.709003	1155	4	0.59192
TADA2B	4	0.013434	0.044054	0.709003	1156	4	0.4586
ZNF785	4	0.013443	0.044081	0.709003	1157	4	0.94891
LRG1	4	0.0135	0.044262	0.710697	1158	4	1.0685
NASP	4	0.013525	0.044337	0.711115	1159	4	0.65774
IL27	4	0.013532	0.044364	0.711115	1160	3	1.0882
KRT36	4	0.013553	0.044433	0.711616	1161	4	0.72339
KAT5	4	0.013619	0.044649	0.713904	1162	3	0.68734
NDUFA13	4	0.013626	0.04467	0.713904	1163	4	1.1289
SMOC2	4	0.013648	0.044728	0.713904	1164	4	0.27326
MSL1	4	0.013648	0.044728	0.713904	1165	2	0.65203
SARS2	4	0.01367	0.044799	0.714179	1166	3	0.99098
ADAMTS10	4	0.013678	0.044822	0.714179	1167	4	0.87377
C11orf94	4	0.013711	0.044933	0.715227	1168	4	0.70764
EN2	4	0.013721	0.044964	0.715227	1169	3	0.62679
MYH11	4	0.013757	0.045069	0.715701	1170	3	0.87472
HNRNPH2	4	0.013758	0.04507	0.715701	1171	3	0.69406
AEBP1	4	0.013828	0.04529	0.718588	1172	2	0.29605
SPDEF	4	0.01386	0.045392	0.719588	1173	3	0.58155
CD164	4	0.013886	0.045477	0.720326	1174	4	0.77585
KRTAP17-1	4	0.013939	0.045643	0.72235	1175	4	0.40765
RANBP3	4	0.014008	0.045856	0.725112	1176	4	0.90174
SYF2	4	0.014022	0.045895	0.725112	1177	3	1.1559
EPS15	4	0.014044	0.045962	0.72556	1178	2	0.4053
MEX3B	4	0.014066	0.046041	0.726199	1179	3	1.2234
ELAC2	4	0.014095	0.046137	0.726734	1180	3	0.73141
OMG	4	0.014101	0.046152	0.726734	1181	4	0.38428
ACAD9	4	0.01414	0.046271	0.727573	1182	2	0.53797
CLUH	4	0.014143	0.046283	0.727573	1183	4	0.61935
PNPLA5	4	0.014191	0.046428	0.728971	1184	3	0.67689
SKAP2	4	0.014222	0.046524	0.728971	1185	3	0.56022
RHOBTB1	4	0.014237	0.046573	0.728971	1186	4	0.43852
PSMB7	4	0.014243	0.046597	0.728971	1187	3	0.66407
RBP7	4	0.014253	0.046632	0.728971	1188	3	0.62624
PCDHB15	4	0.01426	0.046647	0.728971	1189	4	0.49897
PTCD2	4	0.014284	0.046721	0.728971	1190	4	0.62014
PROX1	4	0.014285	0.046722	0.728971	1191	3	0.59906
FAM102B	4	0.014309	0.046794	0.729034	1192	4	0.62342
KRT6B	4	0.014313	0.046804	0.729034	1193	1	0.062757
SSH1	4	0.014417	0.047141	0.733223	1194	4	0.48681
EPRS	4	0.014442	0.047218	0.733223	1195	3	1.0753
OR6V1	4	0.014451	0.047246	0.733223	1196	4	0.38245
ERRFI1	4	0.014454	0.047254	0.733223	1197	4	0.50553
ZMYND12	4	0.014464	0.047283	0.733223	1198	3	0.6785
ULK3	4	0.014474	0.04732	0.733223	1199	4	0.97787
ARL13B	4	0.014489	0.04737	0.733223	1200	3	0.61768
VPS33A	4	0.014512	0.047431	0.733223	1201	3	0.85682
SLFN5	4	0.014528	0.04748	0.733223	1202	1	-0.72392
ANKRD13C	4	0.014531	0.047491	0.733223	1203	4	0.7364
AGR2	4	0.014534	0.047503	0.733223	1204	3	0.53373
NARS2	4	0.014562	0.047589	0.733948	1205	3	0.70179
USP18	4	0.01459	0.047665	0.73449	1206	4	0.42004
RRAGC	4	0.014605	0.047702	0.73449	1207	3	1.3193
BCAR3	4	0.014633	0.04779	0.734739	1208	3	0.74455
DPH5	4	0.014636	0.047797	0.734739	1209	3	0.7771
SRCIN1	4	0.014679	0.047937	0.735729	1210	3	0.66065
C21orf59	4	0.014689	0.047968	0.735729	1211	1	-0.64426
ECE1	4	0.014693	0.047979	0.735729	1212	4	0.68964
TMEM97	4	0.014739	0.048119	0.736271	1213	3	0.72165
CECR2	4	0.014743	0.048132	0.736271	1214	3	0.87381
ANGPTL4	4	0.014743	0.048132	0.736271	1215	2	0.81203
MINOS1	4	0.014775	0.048233	0.737105	1216	3	0.62942
PLA2G7	4	0.01479	0.04827	0.737105	1217	4	0.56159
NFIA	4	0.014813	0.048355	0.737105	1218	4	0.98931
MRPL41	4	0.014822	0.048388	0.737105	1219	4	0.85887
STK17B	4	0.014828	0.048405	0.737105	1220	2	0.21827
DTNBP1	4	0.014835	0.048422	0.737105	1221	3	0.9971
WIPF3	4	0.014892	0.048623	0.739559	1222	4	0.52569
PPP1R14B	4	0.014934	0.048755	0.740944	1223	3	1.0543
KIF18B	4	0.014958	0.048832	0.740944	1224	2	0.46675
BEND5	4	0.014959	0.048833	0.740944	1225	4	0.51278
FAM109B	4	0.014976	0.048881	0.741082	1226	3	1.1884
CXCL14	4	0.014992	0.048942	0.741403	1227	4	0.50382
ATP5J	4	0.015015	0.049014	0.741852	1228	3	0.71415
DNAJB4	4	0.015027	0.049051	0.741852	1229	4	0.67947
ZNF18	4	0.015066	0.049173	0.742897	1230	3	0.97031
TRIM62	4	0.015098	0.049268	0.742897	1231	3	0.57835
BLMH	4	0.015102	0.049278	0.742897	1232	3	0.63018
MAN1A2	4	0.015123	0.049344	0.743286	1233	4	1.1734
ANO5	4	0.015178	0.049489	0.744875	1234	3	1.2817
RPL8	4	0.015238	0.049656	0.746187	1235	3	1.4001
ZRANB2	4	0.015254	0.049699	0.746187	1236	3	0.68017
CRISP3	4	0.015259	0.049714	0.746187	1237	4	0.60863
PDCD10	4	0.015273	0.04976	0.746187	1238	4	0.44427
TTI2	4	0.015278	0.049775	0.746187	1239	4	1.2106
IKBIP	4	0.015298	0.049837	0.746524	1240	3	1.0103
MTFR2	4	0.015346	0.049989	0.748152	1241	2	0.64844
RLF	4	0.015356	0.050026	0.748152	1242	4	0.63972
VTN	4	0.015428	0.050235	0.75068	1243	4	0.41641
HTR1B	4	0.015463	0.050341	0.751281	1244	4	0.46429
KLF13	4	0.01548	0.050397	0.751281	1245	4	0.76734
BEST4	4	0.015507	0.05048	0.751281	1246	2	0.60895
TMEM241	4	0.015509	0.050486	0.751281	1247	4	0.78718
KRTAP10-9	4	0.015515	0.050503	0.751281	1248	2	0.75001
BARX1	4	0.015538	0.050578	0.751281	1249	2	0.37416
PISD	4	0.015561	0.050651	0.751281	1250	3	1.2794
FAM24A	4	0.015569	0.050671	0.751281	1251	2	0.66607
RPL35	3	0.015574	0.040707	0.687758	1252	3	0.74146
CFAP52	4	0.015581	0.0507	0.751281	1253	4	0.61142
RPAIN	4	0.015604	0.050778	0.751281	1254	2	0.2535
TMEM61	4	0.015612	0.05081	0.751281	1255	4	0.42433
ARHGAP22	4	0.015622	0.050846	0.751281	1256	4	0.52783
GUK1	4	0.015624	0.05085	0.751281	1257	3	1.2643
ETV6	4	0.015636	0.05089	0.751281	1258	4	0.43889
SLC35G3	4	0.015647	0.050925	0.751281	1259	2	0.65299
TXNDC12	4	0.015658	0.050964	0.751281	1260	3	0.87828
TSSK3	4	0.01567	0.050996	0.751281	1261	4	0.57156
TMEM88	4	0.015699	0.051086	0.751397	1262	4	0.59651
SOAT1	4	0.015702	0.051096	0.751397	1263	3	0.92249
AQR	4	0.015711	0.051124	0.751397	1264	3	0.65621
H3F3C	4	0.015757	0.051272	0.752294	1265	4	0.41564
ATG16L1	4	0.015765	0.051302	0.752294	1266	1	-0.9114
CBX7	4	0.015774	0.05133	0.752294	1267	4	0.77959
DHX29	4	0.015787	0.051374	0.752294	1268	3	0.86031
BCL6	4	0.015795	0.051399	0.752294	1269	3	0.52965
CTSH	4	0.015805	0.051426	0.752294	1270	4	0.51441
ZNRD1	4	0.015829	0.051493	0.752664	1271	4	0.8962
ING1	4	0.015841	0.051531	0.752664	1272	2	0.14776
CRTC3	4	0.015858	0.051592	0.752957	1273	3	0.69959
FRMPD4	4	0.015869	0.051635	0.753003	1274	3	0.6574
NRIP1	4	0.015884	0.051683	0.753118	1275	3	0.66481
NOMO1	4	0.015927	0.051807	0.753754	1276	4	0.67539
BARX2	4	0.015927	0.051807	0.753754	1277	2	0.42769
FLNB	4	0.015946	0.051871	0.753883	1278	4	0.40486
S100A13	4	0.015953	0.051896	0.753883	1279	4	0.71836
PAK1IP1	4	0.015966	0.051939	0.75392	1280	3	0.80791
DummyGuide_1232	1	0.016002	0.015902	0.436651	1281	1	1.2223
COMMD4	4	0.01601	0.05206	0.755098	1282	4	0.64245
IL17RA	4	0.016064	0.052231	0.756993	1283	3	0.86683
POP7	4	0.016088	0.052303	0.757231	1284	2	1.4228
FUCA1	4	0.016098	0.052329	0.757231	1285	3	0.7221
GBP4	4	0.016113	0.052374	0.757296	1286	4	0.91999
BCL2A1	4	0.016162	0.052503	0.758356	1287	3	0.62575
FAM159A	4	0.01617	0.052528	0.758356	1288	3	0.84345
CACHD1	4	0.016197	0.052598	0.758793	1289	4	1.3318
TOR2A	4	0.016219	0.052667	0.759199	1290	4	0.47323
RPN1	4	0.016246	0.052748	0.759439	1291	4	0.84005
INTS9	4	0.016251	0.052765	0.759439	1292	4	1.4472
YTHDF2	4	0.016279	0.052858	0.760193	1293	3	0.88195
TEX14	4	0.016303	0.052936	0.76066	1294	2	0.47496
MCRS1	4	0.016324	0.052989	0.76066	1295	3	1.6652
ZBTB37	4	0.016333	0.053012	0.76066	1296	4	0.42207
PTPN9	4	0.016356	0.053085	0.761131	1297	1	0.11215
RPL14	4	0.016395	0.053193	0.761753	1298	4	0.95518
TMEM151B	4	0.0164	0.05321	0.761753	1299	3	1.4344
NAGS	4	0.01644	0.053326	0.762576	1300	4	0.5916
PIK3R5	4	0.016448	0.053349	0.762576	1301	4	0.37013
TEF	4	0.016495	0.053481	0.763881	1302	4	0.47903
TRIM45	4	0.016541	0.05363	0.765237	1303	3	0.91526
FGF21	4	0.016568	0.053714	0.765237	1304	3	0.72585
ZPLD1	4	0.016571	0.053718	0.765237	1305	2	0.38436
ZBTB4	4	0.01659	0.053773	0.765237	1306	4	0.49813
CWC25	4	0.016608	0.053826	0.765237	1307	4	0.59286
CD2	4	0.016625	0.053882	0.765237	1308	2	0.43462
ZBTB8OS	4	0.016634	0.053907	0.765237	1309	3	0.81599
FYB	4	0.016638	0.053918	0.765237	1310	4	0.58455
MINDY1	4	0.016656	0.05397	0.765237	1311	4	0.48123
WNT10A	4	0.016671	0.054018	0.765237	1312	4	0.27146
PCM1	4	0.016674	0.054024	0.765237	1313	4	0.25948
TMEM222	4	0.016793	0.054357	0.768207	1314	4	0.86377
C6orf141	4	0.016837	0.054489	0.768988	1315	3	0.80981
EIF1	1	0.016845	0.016799	0.451353	1316	1	1.1654
CMAS	4	0.016933	0.054761	0.772169	1317	3	0.71096
ANO2	4	0.016949	0.05481	0.772288	1318	3	0.58103
MTG1	4	0.016966	0.054861	0.772422	1319	3	0.64188
RPL35A	3	0.016984	0.044208	0.710441	1320	3	1.994
LRRC10B	4	0.016985	0.054915	0.772518	1321	3	1.0795
ALKBH7	4	0.016997	0.05495	0.772518	1322	4	0.62983
ZNF624	4	0.017022	0.055036	0.773138	1323	3	0.68208
HAGH	4	0.017055	0.05513	0.773592	1324	1	-0.27145
MRPL20	4	0.017059	0.05515	0.773592	1325	3	0.65989
ELAVL3	4	0.017078	0.0552	0.773709	1326	2	0.57744
HIST1H2AA	4	0.017108	0.055291	0.774099	1327	3	1.0018
YIPF2	4	0.017114	0.05531	0.774099	1328	3	0.73204
HIST1H2AH	4	0.01714	0.055379	0.774192	1329	4	0.65511
KLHL13	4	0.017162	0.055446	0.774192	1330	2	0.17463
COPRS	4	0.017169	0.055464	0.774192	1331	4	0.45296
C19orf54	4	0.017187	0.055518	0.774192	1332	4	0.77552
TMEM47	4	0.017196	0.055548	0.774192	1333	3	0.82814
STMN1	4	0.017213	0.055598	0.774192	1334	4	0.80605
MVD	4	0.017216	0.055606	0.774192	1335	3	0.76329
ZNF232	4	0.01727	0.05577	0.775902	1336	4	0.73564
PIMREG	4	0.01729	0.055832	0.776178	1337	4	0.54851
SLC44A5	4	0.017353	0.056027	0.777511	1338	3	0.70415
CRTC2	4	0.017377	0.056085	0.777511	1339	1	0.087849
RBFA	4	0.017402	0.056159	0.777511	1340	3	0.72127
ANAPC2	4	0.017431	0.056245	0.777511	1341	3	1.2377
SLC5A10	4	0.017459	0.056325	0.777511	1342	2	0.37664
ABHD16A	4	0.017468	0.056345	0.777511	1343	3	0.87091
TRAP1	4	0.017473	0.056356	0.777511	1344	4	0.49035
ASGR2	4	0.017484	0.056385	0.777511	1345	3	0.84437
TMEM55B	4	0.017484	0.056386	0.777511	1346	2	0.099968
ARHGAP27	4	0.017491	0.056406	0.777511	1347	4	0.73823
MYO15A	4	0.017515	0.056477	0.777511	1348	4	0.53068
GAL3ST4	4	0.01752	0.056488	0.777511	1349	4	0.36037
MFSD1	4	0.017536	0.056537	0.777511	1350	3	0.66093
ZNF112	4	0.017538	0.056547	0.777511	1351	1	-0.11093
GPR19	4	0.017543	0.056561	0.777511	1352	4	0.67508
COL19A1	4	0.017554	0.056591	0.777511	1353	4	0.77448
DNM1L	4	0.017579	0.056669	0.778021	1354	3	0.76331
DHX35	4	0.017703	0.057015	0.781749	1355	3	1.1544
LIM2	4	0.017725	0.057077	0.781749	1356	4	0.35795
TAC4	4	0.017739	0.05712	0.781749	1357	3	0.93131
IL12A	4	0.017747	0.057147	0.781749	1358	3	0.8198
RBAK-RBAKDN	4	0.017749	0.057149	0.781749	1359	4	0.55315
NUP153	4	0.017842	0.057405	0.783219	1360	4	0.6225
SUMF2	4	0.017844	0.057409	0.783219	1361	4	0.36333
SERP2	4	0.01785	0.057424	0.783219	1362	4	0.48945
ETFA	4	0.017868	0.057472	0.783312	1363	4	0.27154
KBTBD2	4	0.017972	0.057779	0.785973	1364	3	0.65209
UBE4B	4	0.017992	0.057833	0.785973	1365	2	0.24884
CISD3	4	0.018001	0.05786	0.785973	1366	4	0.55309
S100A1	4	0.018007	0.05788	0.785973	1367	4	0.71213
IRF1	4	0.018016	0.057908	0.785973	1368	3	0.9548
PHF12	4	0.018021	0.05792	0.785973	1369	3	1.0081
KRT10	4	0.01805	0.058	0.785973	1370	4	0.22799
FXR2	4	0.01805	0.058003	0.785973	1371	3	0.94155
MRPS35	4	0.01813	0.058241	0.788347	1372	3	0.647
TMCO6	4	0.018138	0.058262	0.788347	1373	3	0.80909
NDUFAF1	4	0.018162	0.058335	0.788552	1374	4	1.0043
ODF2L	4	0.018181	0.058387	0.788552	1375	4	0.49024
RFK	4	0.018187	0.058405	0.788552	1376	4	0.70668
DLGAP4	4	0.018208	0.058455	0.788552	1377	4	1.081
HAUS1	4	0.018216	0.058488	0.788552	1378	2	0.80372
MYO1F	4	0.018272	0.058653	0.790219	1379	3	0.60855
CENPA	4	0.018324	0.058818	0.790302	1380	3	1.2406
MYBBP1A	4	0.018343	0.05887	0.790302	1381	3	0.55981
OGFRL1	4	0.018349	0.058884	0.790302	1382	3	0.99552
ZNHIT1	4	0.01836	0.058919	0.790302	1383	4	0.45315
NPTX2	4	0.018374	0.058966	0.790302	1384	2	0.44072
OR4N5	4	0.018386	0.059009	0.790302	1385	3	0.79552
TCF21	4	0.01839	0.059024	0.790302	1386	3	1.1124
UQCRC1	4	0.018408	0.059082	0.790302	1387	3	0.68106
CTRC	4	0.018425	0.059141	0.790302	1388	4	0.50385
GTF3C2	4	0.018427	0.059146	0.790302	1389	3	0.7092
C15orf62	4	0.018449	0.059214	0.790302	1390	2	0.47209
MGST3	4	0.01845	0.059216	0.790302	1391	3	0.48231
MAP7D3	4	0.018452	0.059218	0.790302	1392	3	0.64275
IFI35	4	0.018466	0.059265	0.790302	1393	2	0.31398
WSCD1	4	0.018475	0.059292	0.790302	1394	2	0.4776
TTC39A	4	0.018504	0.059381	0.790825	1395	2	0.36863
RHOF	4	0.018516	0.059415	0.790825	1396	2	0.40652
ASIC3	4	0.01855	0.059507	0.791486	1397	3	0.60025
PRPF4B	4	0.018605	0.059659	0.792819	1398	4	0.75209
LMOD2	4	0.018616	0.059692	0.792819	1399	3	0.52477
DNAJA4	4	0.018633	0.059737	0.79286	1400	3	0.59257
PPBP	4	0.018657	0.05981	0.792899	1401	4	0.66264
TRIM35	4	0.018676	0.059863	0.792899	1402	2	0.47473
ASIC2	4	0.018699	0.059917	0.792899	1403	3	0.63082
CD300LF	4	0.018709	0.05995	0.792899	1404	2	0.40328
CORT	4	0.018724	0.059985	0.792899	1405	3	1.4782
C17orf75	4	0.018726	0.059994	0.792899	1406	3	0.5987
PF4	4	0.018757	0.060072	0.793241	1407	3	1.1603
CCDC114	4	0.01881	0.06021	0.793241	1408	2	0.58459
PHB2	4	0.018823	0.060248	0.793241	1409	4	0.83296
YPEL3	4	0.018831	0.060271	0.793241	1410	4	0.84084
MX2	4	0.018836	0.060285	0.793241	1411	3	0.91468
MAP2K4	4	0.018848	0.060317	0.793241	1412	3	0.46843
ZMYND10	4	0.01886	0.060358	0.793241	1413	3	0.64103
URB2	4	0.018861	0.060358	0.793241	1414	3	1.4396
HACE1	4	0.018902	0.06048	0.793725	1415	3	0.95059
C1orf56	4	0.018933	0.060569	0.794255	1416	4	0.43703
AVPI1	4	0.018945	0.060605	0.794255	1417	4	0.28169
LONP1	4	0.018987	0.060722	0.794812	1418	2	1.0646
NOL7	4	0.01899	0.060732	0.794812	1419	3	1.3471
FMO1	4	0.019013	0.060806	0.79507	1420	2	0.45283
GTF2B	4	0.019023	0.060836	0.79507	1421	4	1.3022
NOTO	4	0.019069	0.060975	0.79633	1422	3	0.6709
HIST1H3F	4	0.019089	0.061035	0.796554	1423	4	0.63838
CTR9	4	0.019157	0.061218	0.797862	1424	4	0.64411
FAM32A	4	0.019158	0.06122	0.797862	1425	2	0.39075
ANKRD53	4	0.019294	0.061647	0.801582	1426	2	0.48766
ZDHHC16	4	0.019325	0.061744	0.801582	1427	4	0.42025
DPH1	4	0.019355	0.061833	0.801582	1428	3	0.79062
TGFBR2	4	0.019362	0.061853	0.801582	1429	3	0.58964
NBPF4	4	0.01937	0.061879	0.801582	1430	4	0.74489
TMEM170B	4	0.019396	0.061953	0.801582	1431	2	0.34162
ARPC5L	4	0.019401	0.06197	0.801582	1432	3	0.79956
ZNF225	4	0.019413	0.062003	0.801582	1433	2	0.27075
GRB2	4	0.019414	0.062005	0.801582	1434	3	1.2084
SYCE2	4	0.019416	0.062006	0.801582	1435	1	-0.14721
SNRNP27	4	0.019431	0.062046	0.801582	1436	3	0.9494
SLC25A46	4	0.019435	0.062061	0.801582	1437	3	0.79225
TNK1	4	0.019447	0.062089	0.801582	1438	4	0.33771
IL17F	4	0.019452	0.06211	0.801582	1439	4	0.73447
PSAP	4	0.019464	0.062147	0.801582	1440	4	0.74258
GGT6	4	0.019482	0.062196	0.801671	1441	3	0.7178
SEC16B	4	0.019533	0.062326	0.802323	1442	3	0.70865
NEIL1	4	0.019552	0.062372	0.802323	1443	4	0.48613
WDR73	4	0.019558	0.062387	0.802323	1444	4	0.85218
UNC13D	4	0.019577	0.062443	0.802323	1445	4	0.52206
TMEM102	4	0.019584	0.062461	0.802323	1446	3	1.2108
BBIP1	3	0.019744	0.050907	0.751281	1447	3	0.94008
CERS4	4	0.019809	0.062956	0.807025	1448	3	0.76478
FITM2	4	0.019888	0.063133	0.808492	1449	3	0.65092
ARPP21	4	0.019898	0.063157	0.808492	1450	1	0.014105
C21orf33	2	0.019954	0.036887	0.658835	1451	2	1.5906
PRKACA	4	0.019999	0.063368	0.810649	1452	2	0.54565
RAB1B	4	0.020081	0.063545	0.811643	1453	3	0.69956
CYR61	4	0.020116	0.063617	0.811643	1454	3	0.82184
TBCC	4	0.020164	0.063717	0.811643	1455	2	0.59176
FTSJ3	4	0.020166	0.063719	0.811643	1456	2	0.3725
SLC25A51	4	0.020194	0.063779	0.811643	1457	3	0.88331
ATRAID	4	0.020211	0.063815	0.811643	1458	3	0.65543
ANKRD34A	4	0.02022	0.063832	0.811643	1459	3	0.5673
MPP3	4	0.020264	0.063914	0.811643	1460	3	0.59099
FGF7	4	0.020269	0.063925	0.811643	1461	2	0.48536
WDR24	4	0.020272	0.063932	0.811643	1462	3	0.73124
CDC42EP5	4	0.020281	0.063948	0.811643	1463	3	0.88551
NSUN5	4	0.02029	0.063965	0.811643	1464	3	0.93575
WASL	4	0.02033	0.064044	0.811704	1465	3	0.54467
RPL4	4	0.020347	0.064082	0.811704	1466	3	1.2151
SLC6A17	4	0.020355	0.0641	0.811704	1467	3	0.89629
MEX3D	4	0.020426	0.064248	0.812692	1468	2	0.76054
CCT4	4	0.020434	0.064265	0.812692	1469	3	2.0752
POM121C	4	0.02047	0.064342	0.813125	1470	3	1.048
TRIM64C	4	0.020525	0.064464	0.813897	1471	3	0.7955
PRSS33	4	0.020565	0.064546	0.813897	1472	3	1.0163
RAD51D	4	0.020596	0.064612	0.813897	1473	3	0.51474
TMEM125	4	0.020604	0.064633	0.813897	1474	3	0.96973
ILF2	4	0.020613	0.064654	0.813897	1475	3	0.79048
CCDC182	4	0.020622	0.064672	0.813897	1476	3	0.85424
HIST2H3D	4	0.020644	0.064707	0.813897	1477	3	1.0541
DummyGuide_1265	1	0.020694	0.020657	0.507734	1478	1	2.1337
ADAM30	4	0.020698	0.06482	0.814683	1479	3	0.76815
ADAMTS9	4	0.020755	0.064943	0.815225	1480	1	-0.28178
ARGLU1	4	0.020809	0.065046	0.815277	1481	2	0.41113
RTL8B	4	0.020857	0.065146	0.815277	1482	2	0.89127
FBXO6	4	0.020862	0.065159	0.815277	1483	2	0.13774
DRC1	4	0.020874	0.065176	0.815277	1484	3	0.75676
RNF11	4	0.020878	0.065187	0.815277	1485	3	0.52772
HLA-E	4	0.020892	0.065208	0.815277	1486	2	0.19761
IKZF3	4	0.020958	0.065348	0.815938	1487	3	0.56875
RAI1	4	0.02099	0.065415	0.816232	1488	2	0.42824
SCN11A	4	0.021023	0.06548	0.816411	1489	2	0.51172
PPP1CB	4	0.021043	0.065517	0.816411	1490	2	0.60135
CPED1	4	0.021082	0.065595	0.816848	1491	3	0.77109
ADRM1	4	0.021132	0.065702	0.81764	1492	3	0.72753
SAMD13	4	0.021181	0.065814	0.81849	1493	3	1.1955
ASAP3	4	0.021237	0.065919	0.819253	1494	3	0.46692
MRFAP1L1	4	0.021265	0.065981	0.819471	1495	2	0.4899
GEMIN4	4	0.021288	0.066027	0.819505	1496	3	1.004
SNX9	4	0.021333	0.066112	0.820011	1497	3	0.44048
ATP6V0D2	4	0.021399	0.066238	0.820779	1498	2	0.26944
SMPD1	4	0.021417	0.066271	0.820779	1499	3	0.69006
HFE2	4	0.021435	0.066305	0.820779	1500	3	0.93287
DummyGuide_1160	1	0.021456	0.021383	0.515456	1501	1	1.5902
LKAAEAR1	4	0.021526	0.066513	0.822516	1502	3	0.77892
EXOC5	4	0.021549	0.066565	0.822516	1503	3	0.72693
CNDP1	4	0.021558	0.066577	0.822516	1504	3	0.40623
ZNF644	4	0.021626	0.066714	0.823676	1505	3	0.61502
ATF4	4	0.021671	0.066815	0.823789	1506	3	0.70007
ACLY	4	0.02168	0.066833	0.823789	1507	3	0.64348
OR2A2	4	0.021689	0.066855	0.823789	1508	3	0.67397
CDIP1	4	0.02174	0.066963	0.824564	1509	3	0.66761
ZHX2	4	0.021771	0.067024	0.824564	1510	3	0.49778
GEMIN7	4	0.021785	0.06705	0.824564	1511	3	0.90484
KRT18	4	0.021821	0.067126	0.824958	1512	3	1.2397
CITED2	4	0.02189	0.067262	0.826084	1513	3	0.67769
GAL3ST3	4	0.021972	0.067433	0.826955	1514	3	0.88781
POMK	4	0.021987	0.067465	0.826955	1515	2	0.26793
TARS	4	0.022038	0.067564	0.826955	1516	2	0.11094
PGLYRP2	4	0.02204	0.067569	0.826955	1517	1	0.09243
TMEM92	4	0.022047	0.06758	0.826955	1518	3	1.2579
ZNF114	4	0.022056	0.0676	0.826955	1519	3	0.9352
AKAP1	4	0.022075	0.067642	0.826955	1520	3	0.72169
GJB1	4	0.022147	0.067794	0.827845	1521	3	0.40574
DMXL1	4	0.022151	0.067803	0.827845	1522	3	0.63174
ZNF524	4	0.022192	0.067885	0.828317	1523	3	0.68061
OGFR	4	0.022233	0.067966	0.82838	1524	3	0.80151
LSS	4	0.022238	0.067979	0.82838	1525	3	0.49616
LRRTM3	4	0.022321	0.068149	0.829624	1526	3	0.52057
CHRM4	4	0.022329	0.068169	0.829624	1527	2	0.4472
PMM2	4	0.022393	0.068308	0.830319	1528	3	0.5635
UQCC3	4	0.022429	0.068378	0.830319	1529	3	0.75125
ZFP69	4	0.022432	0.06838	0.830319	1530	3	0.58699
TFIP11	4	0.022484	0.068484	0.830319	1531	3	0.70889
MIF	4	0.022488	0.06849	0.830319	1532	3	0.50412
B3GALT5	4	0.022497	0.068513	0.830319	1533	3	0.85122
MYOM1	4	0.022512	0.068539	0.830319	1534	2	0.42228
OR7G3	4	0.02253	0.068581	0.830319	1535	3	0.48622
PPP1R15A	4	0.022576	0.068677	0.830952	1536	3	0.53791
KTI12	4	0.022618	0.068755	0.831361	1537	3	0.98227
KLF14	4	0.022677	0.068876	0.831833	1538	2	0.73495
MRPL4	4	0.022682	0.068883	0.831833	1539	2	0.3366
ADORA2A	4	0.022704	0.068936	0.831928	1540	2	0.47383
OLIG1	4	0.022819	0.069176	0.834297	1541	3	1.0534
RBL1	4	0.022852	0.06923	0.83441	1542	3	0.47616
HIST1H2AB	4	0.022884	0.069294	0.834495	1543	3	0.69115
ENSA	4	0.022898	0.069326	0.834495	1544	3	1.2113
JOSD1	4	0.022922	0.069377	0.834576	1545	3	0.48162
ZNF579	4	0.02303	0.069601	0.835495	1546	3	0.47223
SASS6	4	0.023054	0.069651	0.835495	1547	3	0.84376
ZNF592	4	0.023056	0.069656	0.835495	1548	2	0.21666
CREG1	4	0.023091	0.069722	0.835495	1549	3	0.85373
NSD3	4	0.023101	0.06974	0.835495	1550	3	0.70218
FOXRED2	4	0.02311	0.069759	0.835495	1551	2	0.21261
CNPY4	4	0.023147	0.069848	0.835495	1552	3	0.78186
TTN	4	0.023157	0.069865	0.835495	1553	3	0.83511
RELL2	4	0.023163	0.069877	0.835495	1554	1	-0.31357
ZNF696	4	0.023186	0.069921	0.835495	1555	3	1.2186
EMC6	4	0.023193	0.069944	0.835495	1556	3	0.67735
ANAPC5	4	0.023217	0.069992	0.835543	1557	2	0.1203
CORO7	4	0.023299	0.070167	0.83709	1558	3	0.82152
C1orf198	4	0.02336	0.070298	0.837478	1559	2	0.57902
ITGB3	4	0.023371	0.07032	0.837478	1560	3	0.64597
MRPL30	4	0.023404	0.070382	0.837478	1561	3	0.69002
CDC7	4	0.023426	0.070422	0.837478	1562	3	0.9771
NDUFB10	4	0.023444	0.070461	0.837478	1563	2	0.61894
IMPDH2	4	0.023447	0.070467	0.837478	1564	3	0.9483
SLC18A1	4	0.023475	0.070531	0.837613	1565	3	0.74922
HTR1D	4	0.023509	0.070594	0.837613	1566	3	0.60676
PLEKHA3	4	0.023528	0.070634	0.837613	1567	3	0.6056
MAST2	4	0.023537	0.070657	0.837613	1568	1	-0.033941
B3GNT5	4	0.023628	0.070848	0.839348	1569	3	0.78716
ATP1B2	4	0.02365	0.070895	0.839368	1570	3	0.67026
NELFE	4	0.023696	0.070997	0.840051	1571	2	0.42635
CAND2	4	0.023753	0.071111	0.840869	1572	2	0.50477
WNT8A	4	0.023858	0.071323	0.842841	1573	2	-0.052269
BICC1	4	0.023912	0.071421	0.843464	1574	3	0.9426
CPT2	4	0.02394	0.07149	0.843756	1575	3	0.73846
BLOC1S3	4	0.023978	0.071573	0.844196	1576	2	0.62431
GRAMD2A	4	0.024158	0.071932	0.847831	1577	3	0.42548
NFASC	4	0.024178	0.071971	0.847831	1578	3	0.51275
ADAM7	4	0.024246	0.072114	0.848983	1579	3	0.58816
MRPL14	4	0.024339	0.072289	0.850507	1580	3	0.5892
EPAS1	4	0.024446	0.072505	0.851934	1581	1	-0.036274
PDZK1IP1	4	0.024451	0.072515	0.851934	1582	3	0.61433
COMMD3	4	0.024498	0.072592	0.851934	1583	2	0.53248
ENTPD7	4	0.024499	0.072592	0.851934	1584	2	0.084671
MMD2	4	0.024553	0.072704	0.852707	1585	3	0.7368
CALY	4	0.024574	0.072749	0.852707	1586	2	0.54076
CRYBB2	4	0.024597	0.072797	0.852744	1587	3	0.53519
FAM83A	4	0.024736	0.073075	0.855132	1588	3	0.55375
LGALS9	4	0.024745	0.073093	0.855132	1589	3	0.4975
TSPAN13	4	0.024799	0.073203	0.855889	1590	3	0.75296
KCNK17	4	0.024913	0.073448	0.858048	1591	3	0.58638
ZNF438	4	0.024947	0.073524	0.858048	1592	3	0.48875
TFR2	4	0.024962	0.073555	0.858048	1593	3	0.78457
FCF1	4	0.024979	0.073585	0.858048	1594	3	0.7634
LCE5A	4	0.024997	0.073616	0.858048	1595	3	0.81069
C21orf2	4	0.025111	0.073849	0.860129	1596	3	0.60348
ST6GALNAC5	4	0.025131	0.073887	0.860129	1597	3	0.64104
PNMA6A	4	0.025171	0.073968	0.860413	1598	3	0.90514
IKBKB	4	0.025187	0.074003	0.860413	1599	2	0.33427
LCE1F	4	0.025275	0.074186	0.861946	1600	3	0.51241
HIST1H3G	4	0.02532	0.074288	0.861946	1601	3	0.60476
MBTPS1	4	0.025351	0.074352	0.861946	1602	3	1.1964
KBTBD4	4	0.025353	0.074357	0.861946	1603	2	0.28163
PPP6R2	4	0.025355	0.074364	0.861946	1604	3	0.78252
SSX7	4	0.025389	0.074428	0.862154	1605	2	0.43954
PPT1	4	0.025455	0.074557	0.863107	1606	3	0.55335
GNB1L	4	0.025546	0.074747	0.864331	1607	3	1.1318
PRSS55	4	0.025551	0.074754	0.864331	1608	3	0.91608
CSPG4	4	0.02562	0.074877	0.865214	1609	2	0.56958
LURAP1	4	0.02567	0.074991	0.865323	1610	3	0.88646
FAAH	4	0.025682	0.075007	0.865323	1611	3	0.89109
SRPK1	4	0.025689	0.075025	0.865323	1612	3	0.52263
PLOD2	4	0.025728	0.075097	0.865619	1613	2	0.71431
C2CD2	4	0.025762	0.075167	0.865902	1614	3	0.63289
HHLA3	4	0.025828	0.075307	0.866981	1615	3	0.99537
KIAA2022	4	0.02594	0.075519	0.868631	1616	1	-1.3474
OR1N2	4	0.025952	0.075543	0.868631	1617	3	0.49863
BTN2A1	4	0.026	0.07564	0.869215	1618	3	0.76446
TINF2	4	0.026047	0.07573	0.86923	1619	1	0.020573
EZH2	4	0.02605	0.075734	0.86923	1620	2	0.033283
2021-09-03	4	0.026099	0.075837	0.869873	1621	2	0.49603
UNC93B1	4	0.026128	0.075902	0.870086	1622	2	0.43274
NCDN	4	0.02624	0.076157	0.872476	1623	3	0.47269
MFSD6L	4	0.026324	0.07633	0.873926	1624	2	0.15929
YTHDF1	4	0.026367	0.076418	0.874401	1625	1	-0.29823
PADI1	4	0.026424	0.076538	0.874705	1626	3	0.60164
AZIN2	4	0.02647	0.076615	0.874803	1627	3	0.62083
TRIAP1	4	0.026481	0.07664	0.874803	1628	3	0.83573
MLLT1	4	0.026527	0.076719	0.875175	1629	3	0.36473
MOV10L1	4	0.026563	0.076807	0.875477	1630	3	0.74966
KHDRBS2	4	0.026578	0.076839	0.875477	1631	3	0.49715
MEGF11	4	0.026633	0.076954	0.876262	1632	1	-0.12763
TRAPPC1	4	0.026659	0.077019	0.876463	1633	2	0.80792
VEZF1	4	0.026688	0.07708	0.876622	1634	2	0.68103
LMBR1	4	0.026728	0.077167	0.876983	1635	3	0.66956
CKM	4	0.026757	0.077228	0.876983	1636	2	-0.053891
DENND2C	4	0.026793	0.077303	0.876983	1637	2	0.87038
KRTAP26-1	4	0.026795	0.077306	0.876983	1638	3	0.60281
PRDM10	4	0.026817	0.077345	0.876983	1639	2	0.44344
TSPOAP1	4	0.026866	0.077434	0.87703	1640	3	0.55308
GTPBP10	4	0.026868	0.077443	0.87703	1641	3	0.45513
TPI1	4	0.026914	0.077549	0.877281	1642	3	0.7626
RABEP2	4	0.026936	0.07759	0.877281	1643	3	0.66153
SLC25A43	4	0.026951	0.077619	0.877281	1644	3	0.75064
RSPH14	4	0.026966	0.077652	0.877281	1645	3	0.89368
MRPS6	4	0.026995	0.077699	0.877281	1646	3	0.84952
ZFP28	4	0.027081	0.077864	0.878161	1647	3	0.68373
SRPRB	4	0.027084	0.07787	0.878161	1648	3	0.88382
SNAPC3	4	0.027127	0.077959	0.878552	1649	3	0.66892
BID	4	0.027159	0.078033	0.878552	1650	3	0.45708
CHCHD1	4	0.027166	0.078046	0.878552	1651	2	0.39784
SP7	4	0.027216	0.078159	0.878882	1652	3	0.83014
PLAGL1	4	0.027221	0.078169	0.878882	1653	3	0.68285
PRSS1	4	0.027258	0.07824	0.879086	1654	3	0.82938
SPDYE4	4	0.027279	0.078281	0.879086	1655	3	0.99956
KIAA0391	4	0.027353	0.078419	0.879222	1656	3	0.55981
FAM83H	4	0.027357	0.078424	0.879222	1657	3	0.88607
SP6	4	0.027368	0.078446	0.879222	1658	3	1.0288
ZCRB1	4	0.027383	0.07848	0.879222	1659	2	0.55516
SLC6A1	4	0.027486	0.078678	0.880702	1660	3	0.20056
MKRN3	4	0.027513	0.078734	0.880702	1661	2	0.14622
GRAP	4	0.027553	0.078815	0.880702	1662	3	0.85268
ZNF230	4	0.027593	0.078894	0.880702	1663	2	0.42132
MYD88	4	0.027604	0.078918	0.880702	1664	3	0.45725
THOC1	4	0.027614	0.078937	0.880702	1665	3	0.92455
MAPK8IP3	4	0.027615	0.078941	0.880702	1666	3	0.57442
EVI5	4	0.027641	0.078999	0.880826	1667	3	0.90316
ACTRT3	4	0.027699	0.079122	0.881668	1668	1	-0.50373
ZNF300	4	0.027784	0.07931	0.8818	1669	3	0.65002
ELOB	4	0.027804	0.079358	0.8818	1670	3	1.3407
GABPA	4	0.027811	0.079369	0.8818	1671	3	1.1681
IGF2BP1	4	0.027858	0.079462	0.8818	1672	3	0.48363
NMRK2	4	0.027865	0.079476	0.8818	1673	2	0.19114
STAG3	4	0.027895	0.07953	0.8818	1674	3	0.5082
NCOA5	4	0.027901	0.079538	0.8818	1675	3	0.60033
ZNF773	4	0.027911	0.079557	0.8818	1676	3	0.84129
MRPS23	4	0.027965	0.079657	0.88239	1677	2	0.57062
OR5M9	4	0.028019	0.079773	0.88285	1678	1	0.1182
ETS2	4	0.028028	0.079793	0.88285	1679	3	0.50203
WFS1	4	0.028124	0.079977	0.884373	1680	3	0.94817
ATP5C1	4	0.028193	0.08011	0.88487	1681	3	0.69341
PDE3A	4	0.028204	0.08013	0.88487	1682	3	0.77364
SART1	4	0.028228	0.080175	0.88487	1683	3	1.4155
PDSS1	4	0.028259	0.08024	0.88487	1684	3	0.70984
CFAP161	4	0.028268	0.080258	0.88487	1685	3	0.37821
TRMT1	4	0.028299	0.080317	0.885001	1686	3	0.60762
ST6GALNAC3	4	0.028392	0.080515	0.886662	1687	1	0.25265
CENPE	4	0.028445	0.080626	0.887117	1688	2	0.35067
R3HDML	4	0.028488	0.080691	0.887117	1689	3	0.48631
HLA-DQB1	4	0.028498	0.080706	0.887117	1690	2	0.18335
MRPL19	4	0.028542	0.080803	0.887117	1691	3	0.85394
PRICKLE4	4	0.028551	0.080824	0.887117	1692	2	0.38151
SFN	4	0.028573	0.080867	0.887117	1693	3	0.86068
MISP3	4	0.028584	0.080891	0.887117	1694	2	0.39273
OSBPL9	4	0.028604	0.080935	0.887117	1695	3	0.45429
NPDC1	4	0.028634	0.080989	0.887188	1696	2	0.58959
NEDD4L	4	0.028747	0.081221	0.888586	1697	3	0.56631
SERPINB4	4	0.028752	0.081232	0.888586	1698	3	0.54754
FOXP4	4	0.028763	0.081259	0.888586	1699	3	0.59824
LRRC8D	4	0.028787	0.081314	0.888674	1700	2	0.335
PPP2R2A	4	0.02892	0.081585	0.890879	1701	2	0.37207
ADAMTSL5	4	0.028931	0.081611	0.890879	1702	3	0.81995
NT5C3A	4	0.028964	0.081679	0.891104	1703	3	1.0159
SMARCC2	4	0.029056	0.081858	0.891396	1704	3	0.55243
BMP8B	4	0.029074	0.081909	0.891396	1705	3	1.0684
MEP1A	4	0.029089	0.081942	0.891396	1706	3	0.85697
SPEF1	4	0.029121	0.082005	0.891396	1707	3	0.80851
LDHB	4	0.029136	0.082041	0.891396	1708	3	0.66864
FAU	4	0.029143	0.082057	0.891396	1709	3	1.2057
UCHL5	4	0.029176	0.082133	0.891396	1710	3	1.2255
ANKIB1	4	0.029177	0.082134	0.891396	1711	2	0.49376
CEP85L	4	0.029208	0.082184	0.891424	1712	3	0.61038
CAMK2B	4	0.029296	0.082357	0.892786	1713	2	0.093061
CALD1	4	0.029389	0.082543	0.89332	1714	3	0.66317
CEP250	4	0.029393	0.082549	0.89332	1715	3	0.74659
ZNF394	4	0.029496	0.082772	0.895215	1716	2	0.27642
DRG1	4	0.029581	0.082945	0.896208	1717	3	0.3687
DEPDC1	4	0.029589	0.082959	0.896208	1718	3	0.52782
FANCE	4	0.02968	0.083147	0.897721	1719	3	0.80392
UPK3BL1	2	0.029713	0.054346	0.768207	1720	1	0.6239
FAM47C	4	0.029796	0.0834	0.899928	1721	2	0.30738
FAM20A	4	0.029829	0.083455	0.900008	1722	3	0.5896
HFE	4	0.0299	0.083602	0.900919	1723	3	0.64534
FAM210A	4	0.029918	0.083635	0.900919	1724	3	1.0102
TMEM106A	4	0.030066	0.083952	0.903235	1725	3	0.6274
CCR7	4	0.0302	0.084225	0.905186	1726	1	-0.078561
SLC25A10	4	0.030306	0.084447	0.906564	1727	2	0.37434
PCDHB6	4	0.030307	0.08445	0.906564	1728	3	0.56054
BAX	4	0.03033	0.084499	0.906572	1729	3	1.0601
PYY	4	0.030358	0.084564	0.90675	1730	3	0.82744
DummyGuide_1113	1	0.030365	0.03027	0.612044	1731	1	1.1352
RNF24	4	0.030515	0.08488	0.907379	1732	2	0.24957
SRXN1	4	0.030519	0.084887	0.907379	1733	3	0.32078
PFKFB4	4	0.03052	0.084888	0.907379	1734	3	0.8118
TXN	3	0.03052	0.076516	0.874705	1735	2	1.4119
RCC1L	4	0.030536	0.084919	0.907379	1736	3	0.97597
C9orf84	4	0.030593	0.085031	0.907379	1737	3	0.62933
NUGGC	4	0.030626	0.085113	0.907379	1738	2	0.40244
C2CD4B	4	0.030627	0.085115	0.907379	1739	3	0.43098
EDARADD	4	0.030641	0.085143	0.907379	1740	2	0.39817
IQSEC1	4	0.030679	0.085225	0.907379	1741	1	-0.45036
ZNF76	4	0.030717	0.085301	0.907379	1742	3	0.70923
PHLDA3	4	0.030732	0.08533	0.907379	1743	2	0.79201
OR5T2	4	0.030745	0.085356	0.907379	1744	3	0.53577
FGD2	4	0.030746	0.085359	0.907379	1745	2	0.51921
MPIG6B	4	0.030756	0.08538	0.907379	1746	3	0.78688
GNG7	4	0.030767	0.085401	0.907379	1747	3	0.67309
SSH3	4	0.03079	0.085445	0.907379	1748	3	0.39319
XKR8	4	0.030838	0.085536	0.907829	1749	3	0.95864
ZNF469	4	0.030945	0.085775	0.909852	1750	1	0.04168
RIPOR2	4	0.030993	0.085871	0.910356	1751	3	0.94728
NWD1	4	0.031073	0.086029	0.910356	1752	3	0.40656
TP53RK	4	0.031084	0.086058	0.910356	1753	3	0.58038
OR13J1	4	0.031104	0.086099	0.910356	1754	1	0.10412
PLD1	4	0.031107	0.086104	0.910356	1755	3	0.69965
MMD	4	0.031147	0.08618	0.910356	1756	3	0.63642
EFCC1	4	0.031158	0.086203	0.910356	1757	3	0.59501
ZNF268	4	0.031215	0.086306	0.910356	1758	3	0.38235
RPN2	4	0.031253	0.086389	0.910356	1759	2	0.42326
THAP7	4	0.031254	0.086392	0.910356	1760	3	0.51171
CTH	4	0.031263	0.086411	0.910356	1761	2	0.38721
CALML3	4	0.031317	0.086507	0.910356	1762	2	0.28976
FOXD4L1	4	0.031328	0.086529	0.910356	1763	3	0.77953
PPP1R35	4	0.031348	0.086572	0.910356	1764	3	0.75542
DCHS2	4	0.031363	0.086599	0.910356	1765	3	0.84445
AIMP2	4	0.031476	0.086821	0.912058	1766	2	0.36626
EZH1	4	0.031497	0.086858	0.912058	1767	3	0.68922
HDAC11	4	0.031646	0.087143	0.913718	1768	2	0.70523
HCRT	4	0.031677	0.087208	0.913718	1769	3	0.92903
TRIM64B	3	0.03172	0.07928	0.8818	1770	3	0.82472
SNRNP48	4	0.031741	0.087321	0.913718	1771	2	0.86778
SELENOF	4	0.031752	0.087342	0.913718	1772	3	0.49339
MED23	4	0.031795	0.08742	0.913718	1773	3	0.73003
CACNB1	4	0.031804	0.087436	0.913718	1774	3	0.49253
TUFT1	4	0.031817	0.087464	0.913718	1775	2	0.41912
TMOD4	4	0.031827	0.087482	0.913718	1776	2	0.54076
INSL3	4	0.031832	0.087495	0.913718	1777	3	0.60797
MRPL23	4	0.031848	0.08752	0.913718	1778	2	0.2905
SSH2	4	0.031925	0.087672	0.913718	1779	3	0.91052
WNK4	4	0.031934	0.087687	0.913718	1780	3	0.47229
DLX4	4	0.031945	0.087708	0.913718	1781	3	0.66955
TSPYL4	4	0.031954	0.087726	0.913718	1782	3	0.62551
TMEM53	4	0.031988	0.087796	0.913718	1783	3	0.88159
DCTN3	4	0.03203	0.087886	0.914066	1784	3	0.80461
REPIN1	4	0.032052	0.087927	0.914066	1785	3	0.64098
ZNF286B	4	0.032081	0.087993	0.914067	1786	3	0.61164
PARS2	4	0.03211	0.088045	0.914067	1787	3	0.74992
PTK2	4	0.032133	0.088099	0.914067	1788	3	0.5715
MTERF1	4	0.032166	0.088183	0.914067	1789	3	0.42411
KLHDC7A	4	0.032173	0.088194	0.914067	1790	3	0.64835
SUN2	4	0.032185	0.088219	0.914067	1791	3	0.52935
BTNL3	4	0.032272	0.088402	0.915085	1792	1	0.24865
EDC4	4	0.032277	0.088415	0.915085	1793	3	0.63453
LRRN2	4	0.032359	0.088591	0.915134	1794	3	0.50061
RABGGTA	4	0.032417	0.088696	0.915134	1795	3	1.1074
LRRC38	4	0.032428	0.088711	0.915134	1796	2	0.36974
CYP3A7	4	0.032432	0.088721	0.915134	1797	1	-0.11404
ASAH1	4	0.032492	0.088853	0.915134	1798	2	0.346
WARS2	4	0.032493	0.088853	0.915134	1799	3	1.2308
UBALD1	4	0.032522	0.088907	0.915134	1800	3	0.89535
ACVR1C	4	0.032538	0.088942	0.915134	1801	2	0.27822
ALG14	4	0.032557	0.08899	0.915134	1802	3	0.92124
UTP14C	4	0.032579	0.089019	0.915134	1803	2	0.20576
TLR3	4	0.032592	0.089047	0.915134	1804	3	0.63358
NUFIP1	4	0.032611	0.089086	0.915134	1805	3	0.5344
KISS1R	4	0.032622	0.089103	0.915134	1806	2	0.23327
PPIG	4	0.032656	0.089179	0.915419	1807	3	0.41747
VPS18	4	0.032721	0.089318	0.916207	1808	3	1.0467
PDCL3	4	0.03275	0.089381	0.916207	1809	3	0.69858
BRCA2	4	0.032762	0.089403	0.916207	1810	3	0.69868
PIRT	4	0.032803	0.089481	0.916341	1811	2	-0.14547
ZMAT5	4	0.032816	0.089514	0.916341	1812	3	0.93789
MYL10	4	0.032861	0.089592	0.916646	1813	3	0.53764
ABCC1	4	0.032897	0.089671	0.916956	1814	3	0.43317
C8orf44	4	0.032935	0.089761	0.917283	1815	2	0.26326
SEC13	4	0.032979	0.089849	0.917283	1816	3	1.0217
KBTBD13	4	0.033	0.089892	0.917283	1817	2	0.20367
GORASP1	4	0.033015	0.089914	0.917283	1818	2	0.44618
SMURF2	4	0.033076	0.090034	0.917283	1819	3	0.69421
METTL13	4	0.033085	0.09005	0.917283	1820	3	0.54805
IGFLR1	4	0.033091	0.09006	0.917283	1821	3	0.49341
ZNF747	4	0.033126	0.090143	0.917283	1822	3	0.60774
FAXC	4	0.033131	0.090155	0.917283	1823	2	0.25594
ADAMTSL4	4	0.03315	0.090193	0.917283	1824	3	0.76581
C8orf86	4	0.033228	0.090343	0.917592	1825	2	0.28337
PIAS3	4	0.03324	0.090363	0.917592	1826	3	1.0997
PPP1R12C	4	0.033316	0.090537	0.917592	1827	2	0.34391
L3MBTL2	4	0.033387	0.090686	0.917592	1828	1	0.0023734
ACSF2	4	0.033414	0.090734	0.917592	1829	2	0.06816
RBM28	4	0.03344	0.090794	0.917592	1830	3	0.56161
PRSS38	4	0.033458	0.090837	0.917592	1831	2	0.44018
RFX5	4	0.033487	0.090893	0.917592	1832	3	0.75081
TRABD2B	4	0.033578	0.091063	0.917592	1833	3	0.67034
KCTD10	4	0.033648	0.091196	0.917592	1834	3	0.89904
EFCAB14	4	0.033666	0.091226	0.917592	1835	3	0.74807
GLP2R	4	0.033676	0.091248	0.917592	1836	2	0.80109
TAB1	4	0.033683	0.091263	0.917592	1837	3	0.46338
PTAFR	4	0.033687	0.091268	0.917592	1838	2	0.27986
ADGRF5	4	0.033695	0.091295	0.917592	1839	3	0.61331
TGFB1	4	0.033753	0.091405	0.917592	1840	2	0.37157
P2RY1	4	0.033797	0.091489	0.917592	1841	2	0.34092
GUCD1	4	0.033821	0.091531	0.917592	1842	3	0.81089
ID3	4	0.03384	0.091576	0.917592	1843	2	0.1757
CA1	4	0.033845	0.09158	0.917592	1844	3	0.48385
FAM221B	4	0.033873	0.091631	0.917592	1845	3	1.0199
PPP1R11	4	0.033898	0.091685	0.917592	1846	3	0.92342
GMPPB	4	0.033904	0.091698	0.917592	1847	3	1.0917
PON1	4	0.033906	0.091702	0.917592	1848	2	0.59242
FIBCD1	4	0.03391	0.091714	0.917592	1849	3	0.65141
USP21	4	0.033917	0.091732	0.917592	1850	2	0.44769
EBI3	4	0.03395	0.091813	0.917592	1851	3	0.5358
TKT	4	0.03397	0.091847	0.917592	1852	2	0.13749
ST8SIA5	4	0.03397	0.091848	0.917592	1853	3	0.55216
BLOC1S5	4	0.033988	0.091886	0.917592	1854	3	1.452
TTC22	4	0.034023	0.091964	0.917592	1855	2	0.55615
HIST1H3D	4	0.034038	0.091996	0.917592	1856	2	0.31804
PTH2	4	0.034042	0.092007	0.917592	1857	3	0.69916
RBBP7	4	0.03406	0.09204	0.917592	1858	2	0.52747
PHYH	4	0.034076	0.092076	0.917592	1859	2	0.03503
PLOD1	4	0.034126	0.092174	0.917592	1860	3	1.161
ORC6	4	0.034148	0.092225	0.917592	1861	3	0.604
IKZF5	4	0.034156	0.092239	0.917592	1862	3	0.68112
PTDSS1	4	0.03417	0.092278	0.917592	1863	2	0.49353
SYAP1	4	0.034235	0.092401	0.918236	1864	1	0.040279
KMT5A	4	0.034259	0.09244	0.918236	1865	3	0.57859
CENPV	4	0.034288	0.092494	0.918284	1866	2	0.29296
CRAMP1	4	0.034341	0.092616	0.919008	1867	1	0.18324
SH2D4A	4	0.034435	0.092801	0.919715	1868	2	0.31069
IL6R	4	0.034452	0.092831	0.919715	1869	3	0.65123
AGER	4	0.034476	0.09288	0.919715	1870	3	0.79776
NFYC	4	0.034554	0.093026	0.919715	1871	3	0.57894
HGS	4	0.034573	0.09306	0.919715	1872	3	0.93204
OR7A17	4	0.034579	0.093073	0.919715	1873	3	0.51246
CA9	4	0.034606	0.093118	0.919715	1874	1	-0.22515
SYMPK	4	0.034609	0.093123	0.919715	1875	3	1.8542
ARFIP2	4	0.034612	0.093129	0.919715	1876	3	0.52719
MBD3L3	2	0.034649	0.062927	0.807025	1877	2	1.0084
ETV5	4	0.034659	0.09322	0.919728	1878	2	0.052876
GTF3C5	4	0.034688	0.093274	0.919728	1879	3	0.67208
TBX18	4	0.03469	0.093277	0.919728	1880	2	0.35064
ZXDA	4	0.034815	0.093537	0.921804	1881	3	0.91299
OR4D2	4	0.03487	0.093655	0.922032	1882	3	0.55007
GNG12	4	0.034937	0.093778	0.922722	1883	3	0.77749
NARS	4	0.034962	0.093828	0.922731	1884	3	0.94374
FASTKD2	4	0.034992	0.093893	0.922891	1885	3	0.48079
DDX42	4	0.03503	0.093964	0.923103	1886	3	0.64629
TMIGD2	4	0.035133	0.094188	0.924817	1887	3	0.68187
FZD9	4	0.035189	0.094313	0.925533	1888	3	0.47246
ATF6	4	0.035212	0.09436	0.925533	1889	3	0.55463
TDRD3	4	0.035235	0.094412	0.925567	1890	2	0.50842
ZNHIT3	4	0.035267	0.094486	0.925807	1891	3	1.2755
TAL1	4	0.035316	0.094582	0.926265	1892	3	0.73235
CELF1	4	0.035348	0.094639	0.926334	1893	3	0.44771
CRB2	4	0.035384	0.094716	0.926605	1894	3	0.60206
GUCA2B	4	0.035506	0.094953	0.928095	1895	1	0.05141
ACTC1	4	0.035514	0.094967	0.928095	1896	2	0.24975
MYO10	4	0.035544	0.095023	0.928153	1897	3	0.62534
SLC22A1	4	0.035649	0.095215	0.929546	1898	2	0.52478
OCM2	4	0.035698	0.095309	0.929867	1899	3	0.81161
PRSS36	4	0.035718	0.095349	0.929867	1900	2	0.0055626
SLC26A5	4	0.035741	0.095396	0.929867	1901	3	0.64414
FLOT2	4	0.035771	0.095448	0.929883	1902	1	0.0004365
APBB2	4	0.035877	0.095654	0.930439	1903	1	-1.3299
BCLAF1	4	0.035995	0.095891	0.932266	1904	3	0.62119
PLET1	4	0.036036	0.095979	0.932635	1905	1	-0.36457
FAM199X	4	0.036077	0.096063	0.932967	1906	2	0.74113
S100PBP	4	0.036142	0.096181	0.933635	1907	1	-0.56161
MESDC1	4	0.036263	0.096432	0.934978	1908	3	0.46043
MRPS7	4	0.036275	0.096457	0.934978	1909	3	0.77198
FKBPL	4	0.036281	0.096469	0.934978	1910	3	0.61159
CSRP1	4	0.036459	0.096837	0.936941	1911	1	-0.21606
TTC19	4	0.036495	0.096909	0.936941	1912	3	0.71895
PLIN1	4	0.0365	0.096924	0.936941	1913	3	0.46084
ELP4	4	0.036529	0.096979	0.936941	1914	2	0.67226
TIGAR	4	0.036538	0.096994	0.936941	1915	3	0.62941
S100A7A	4	0.03655	0.097021	0.936941	1916	3	0.8498
KCNA2	4	0.0366	0.097131	0.937337	1917	3	0.67539
CIAO1	4	0.036618	0.097162	0.937337	1918	1	-0.049307
CTNND2	4	0.036745	0.097381	0.938344	1919	3	0.70484
RELA	4	0.03682	0.097542	0.938344	1920	3	0.44141
ST8SIA2	4	0.036827	0.097561	0.938344	1921	3	0.6294
GOT1L1	4	0.03689	0.097688	0.938344	1922	3	0.57
ARNT2	4	0.036915	0.097732	0.938344	1923	3	0.66405
CYHR1	4	0.036921	0.097746	0.938344	1924	3	0.35229
APOL5	4	0.036961	0.097819	0.938344	1925	3	0.63557
UBE2D4	4	0.036972	0.097844	0.938344	1926	3	0.54838
LOXL1	4	0.037041	0.097985	0.938344	1927	3	0.85213
GLYATL2	4	0.037052	0.098008	0.938344	1928	3	0.80253
FAM104B	4	0.037121	0.098133	0.938344	1929	2	0.40682
EIF3B	4	0.037144	0.098181	0.938344	1930	3	1.175
RLN3	4	0.037147	0.098187	0.938344	1931	3	0.6403
METAP2	4	0.037148	0.098191	0.938344	1932	3	1.3583
NDUFA6	4	0.037178	0.098264	0.938344	1933	3	0.88404
DMPK	4	0.037186	0.098274	0.938344	1934	3	0.72068
E4F1	4	0.037193	0.098287	0.938344	1935	3	0.56182
CD151	4	0.037253	0.098426	0.938344	1936	2	0.19507
2021-09-05	4	0.037288	0.098492	0.938344	1937	3	0.59453
BTRC	4	0.037292	0.098499	0.938344	1938	3	0.51146
HSPD1	4	0.0373	0.098511	0.938344	1939	3	1.0266
OR2T1	4	0.037304	0.098517	0.938344	1940	2	0.19462
ATL3	4	0.037305	0.098518	0.938344	1941	1	-0.055808
UBB	3	0.03737	0.092085	0.917592	1942	2	0.2963
AK4	1	0.037451	0.03737	0.662416	1943	1	0.97374
NPFFR2	4	0.037453	0.0988	0.939503	1944	2	0.58986
SPI1	4	0.037472	0.098835	0.939503	1945	3	0.58899
GLCE	4	0.037476	0.09884	0.939503	1946	3	0.52363
COL6A1	4	0.037536	0.098965	0.93994	1947	3	0.59449
PRSS16	4	0.037567	0.099029	0.93994	1948	2	0.63385
TRA2B	4	0.03757	0.099036	0.93994	1949	3	0.4841
BNIPL	4	0.037657	0.099197	0.940746	1950	3	0.37335
CDC42SE1	4	0.037765	0.099398	0.940746	1951	3	0.53585
GTSE1	4	0.037772	0.099409	0.940746	1952	3	0.77881
POLE2	4	0.037823	0.099519	0.940746	1953	3	1.3478
RIMBP3	4	0.037843	0.099559	0.940746	1954	3	0.61404
LAMA3	4	0.037868	0.099608	0.940746	1955	3	0.58387
L1TD1	4	0.037887	0.099648	0.940746	1956	3	0.88581
NR4A2	4	0.037912	0.099685	0.940746	1957	2	0.43857
CDH22	4	0.037924	0.099712	0.940746	1958	2	0.66393
TOMM22	4	0.037925	0.099714	0.940746	1959	3	0.84849
ARMC12	4	0.037932	0.099723	0.940746	1960	3	0.6681
AGO4	4	0.037996	0.09985	0.941164	1961	3	0.82188
RBBP8	4	0.038005	0.099868	0.941164	1962	2	0.61472
NOA1	4	0.038074	0.1	0.941968	1963	2	0.53731
CXXC1	4	0.038105	0.10006	0.941968	1964	3	1.2378
SRCAP	4	0.038163	0.10019	0.941968	1965	3	0.84061
NPBWR2	4	0.038201	0.10026	0.941968	1966	2	0.31127
XPNPEP3	4	0.038202	0.10027	0.941968	1967	3	0.69114
IGF2BP2	4	0.038236	0.10032	0.941968	1968	2	0.44092
CDC123	4	0.038247	0.10035	0.941968	1969	3	1.0852
ZNF7	4	0.038259	0.10037	0.941968	1970	2	0.17621
C17orf98	4	0.038294	0.10042	0.941968	1971	2	0.3999
ZNF576	4	0.03831	0.10046	0.941968	1972	2	0.24539
SLC22A15	4	0.038386	0.10061	0.942937	1973	3	0.78335
LGALS2	4	0.038468	0.10079	0.944157	1974	1	-0.03952
FKBP3	4	0.038549	0.10094	0.94444	1975	2	0.73742
C9orf152	4	0.038607	0.10106	0.94444	1976	2	0.47129
TELO2	4	0.038627	0.1011	0.94444	1977	2	0.27634
C1orf168	4	0.03868	0.10121	0.94444	1978	2	0.67224
C2CD4C	4	0.03868	0.10121	0.94444	1979	3	0.74961
CDC37L1	4	0.038699	0.10125	0.94444	1980	3	0.49486
ZNF396	4	0.038732	0.10131	0.94444	1981	3	0.36388
GAA	4	0.038738	0.10132	0.94444	1982	3	0.56174
ZAN	4	0.038793	0.10143	0.94444	1983	2	0.44737
DEK	4	0.03881	0.10147	0.94444	1984	3	0.67768
NEU1	4	0.038816	0.10148	0.94444	1985	2	0.43303
PTPRG	4	0.038829	0.1015	0.94444	1986	3	0.56341
NFKBIE	4	0.038862	0.10157	0.94444	1987	3	0.53207
SPRY4	4	0.038886	0.10161	0.94444	1988	2	0.52107
RNF40	4	0.038944	0.10174	0.94444	1989	3	0.62449
MROH7	4	0.038953	0.10175	0.94444	1990	3	0.74948
C17orf99	4	0.038956	0.10176	0.94444	1991	2	0.7382
PNLDC1	4	0.038966	0.10177	0.94444	1992	3	0.54177
ACOT2	4	0.038968	0.10178	0.94444	1993	2	0.41124
SPANXB1	4	0.038991	0.10183	0.94444	1994	2	0.25447
SLC13A4	4	0.039102	0.10205	0.944944	1995	2	0.10363
BCL6B	4	0.039129	0.1021	0.944944	1996	3	0.46607
AHCTF1	4	0.039155	0.10214	0.944944	1997	2	0.39094
ASAP2	4	0.039168	0.10216	0.944944	1998	3	0.39886
GOLGB1	4	0.039188	0.10219	0.944944	1999	3	0.75002
[truncated: 16,755 more rows]
